# Supplementary material for: Kinome state is predictive of cell viability in pancreatic cancer tumor and cancer-associated fibroblast cell lines
Source: PeerJ. 2024 Aug 28;12:e17797. doi: 10.7717/peerj.17797 (PMC11365483; doi:10.7717/peerj.17797)
Supplement: Table S1 [file peerj-12-17797-s003.xlsx]

## Sheet: Legend
Table S2 | List of all high and low confidence targets selected after manual data inspection. Target are sorted by the used lysate and beads. The main data for this paper can be found in the sheet titled "Kinobeads".
"Target Annotation"
	Column	Description
	Gene name	Gene name or Uniprot Accession of the target.
	Link to ProteomicsDB	A direct link to the protein in ProteomicsDB.
	URL to ProteomicsDB	Hidden column containing the URL to ProteomicsDB.
	Protein/lipid kinase	An "x" indicates that this protein is a protein or lipid kinase.
	Pseudokinase	An "x" indicates that this protein is a pseudo kinase.
	NTP binding	An "x" indicates that this protein is a nucleotide binding protein.
	metabolic kinase	An "x" indicates that this protein is a metabolic kinase.
	Helicase	An "x" indicates that this protein is a helicase.
	GTPase	An "x" indicates that this protein is a GTPase.
	ATPase	An "x" indicates that this protein is a ATPase.
	FAD cofactor	An "x" indicates that this protein requires FAD as a co-factor.
	heme binding	An "x" indicates that this protein is a heme binder.
	NAD(P)H cofactor	An "x" indicates that this protein requires NAD(P)H as a co-factor.
	might be coenriched	An "x" indicates that this protein might be coenriched as a complex member.
	interacting kinases (BioGrid)	potential complex partner.
	Overall confidence	Shows the highest confidence of an observed drug:protein interaction in all data.
	Confidence in Kinobeads	Shows the highest confidence of an observed drug:protein interaction in Kinobeads data only.
	Lowest observed pKd in Kinobeads [nM]	Most potent interaction observed in Kinobeads data.
	Confidence in BT-474	Shows the highest confidence of an observed drug:protein interaction in BT-474 data only.
	Confidence in Caki-1	Shows the highest confidence of an observed drug:protein interaction in Caki-1 data only.
	Confidence in Omipalisib probe	Shows the highest confidence of an observed drug:protein interaction in Omipalisib prove data only.
"Kinobeads", "in BT-474", "with Caki-1" and "Omipalisib Probe"
	Column	Description
	Drug	Name of the inhibitor. See also Supplementary Table 1 for more details.
	Lysate	Lysate used for the profiling.
	Beads	Beads used for the profiling.
	Gene Name	Gene name or Uniprot Accession of the target.
	Relative Intensity DMSO	Relative intensity used for the curve fit (normalized to DMSO).
	Relative Intensity 3 nM	Relative intensity used for the curve fit (normalized to DMSO).
	Relative Intensity 10 nM	Relative intensity used for the curve fit (normalized to DMSO).
	Relative Intensity 30 nM	Relative intensity used for the curve fit (normalized to DMSO).
	Relative Intensity 100 nM	Relative intensity used for the curve fit (normalized to DMSO).
	Relative Intensity 300 nM	Relative intensity used for the curve fit (normalized to DMSO).
	Relative Intensity 1000 nM	Relative intensity used for the curve fit (normalized to DMSO).
	Relative Intensity 3000 nM	Relative intensity used for the curve fit (normalized to DMSO).
	Relative Intensity 30000 nM	Relative intensity used for the curve fit (normalized to DMSO).
	DMSO Intensity	Protein intensity in the DMSO control
	Intensity Type	Describes the intensity value used for the curve fit. Can be either Normalized LFQ intensity (Maxquant LFQ) or Normalized intensity (raw intensity).
	Slope	Hill slope of the curve fit at the inflection point. See also Supplementary Information for details about the curve fit.
	Bottom	Plateau of the curve fit. See also Supplementary Information for details about the curve fit.
	Top	Maximal residual binding of the curve fit. See also Supplementary Information for details about the curve fit.
	Inflection	Inflection point of the curve fit. This value is the EC50. See also Supplementary Information for details about the curve fit.
	EC50	EC50 (inflection point).
	EC50 Standard Error	Standard error of the EC50 estimation as provided by the drc package.
	Correction Factor	Correction factor used to transform EC50 values into apparent Kd. See details in Supplemantary information.
	Apparent Kd	Calculated based on EC50 * min(1, Correction factor).
	R2	Goodness of fit measured by the coefficient of determination.
	BIC	Goodness of fit measured by the Bayesian information criterion.
	Target Classification	Result of the manual target classification. Target can be either high or low confidence target. See Supplementary Information for details.

## Sheet: Target Annotation
Protein	Link to ProteomicsDB	URL to ProteomicsDB	protein/lipid kinase	pseudokinase	NTP binding	metabolic kinase	Helicase	GTPase	ATPase	FAD cofactor	heme binding	might be coenriched	interacting kinases (BioGrid)	Overall confidence	In Kinobeads	Lowest observed pKd in Kinobeads [nM]	In BT-474	In Caki-1	In Omipalisib probe
AAK1	ProteomicsDB - AAK1	https://www.proteomicsdb.org/proteomicsdb/#human/proteinDetails/61355/assay	x		x									High confidence	High confidence	1	High confidence
AARS	ProteomicsDB - AARS	https://www.proteomicsdb.org/proteomicsdb/#human/proteinDetails/56022/assay			x									High confidence			High confidence
ABL1	ProteomicsDB - ABL1	https://www.proteomicsdb.org/proteomicsdb/#human/proteinDetails/51259/assay	x		x									High confidence	High confidence	2	High confidence	High confidence
ABL2	ProteomicsDB - ABL2	https://www.proteomicsdb.org/proteomicsdb/#human/proteinDetails/55528/assay	x		x									High confidence	High confidence	1	High confidence	High confidence
ACAD10	ProteomicsDB - ACAD10	https://www.proteomicsdb.org/proteomicsdb/#human/proteinDetails/66515/assay								x		x	NTRK3	High confidence	High confidence	78	High confidence
ACAD11	ProteomicsDB - ACAD11	https://www.proteomicsdb.org/proteomicsdb/#human/proteinDetails/68516/assay								x		x	STK25	High confidence	High confidence	1916	High confidence	High confidence
ACADVL	ProteomicsDB - ACADVL	https://www.proteomicsdb.org/proteomicsdb/#human/proteinDetails/56061/assay								x		x	NTRK1|EEF2K	Low confidence	Low confidence			Low confidence
ACOX1	ProteomicsDB - ACOX1	https://www.proteomicsdb.org/proteomicsdb/#human/proteinDetails/60421/assay								x		x	RAF1	Low confidence	Low confidence
ACOX3	ProteomicsDB - ACOX3	https://www.proteomicsdb.org/proteomicsdb/#human/proteinDetails/48541/assay								x				High confidence	High confidence	26
ACP1	ProteomicsDB - ACP1	https://www.proteomicsdb.org/proteomicsdb/#human/proteinDetails/54220/assay										x	EPHA2|EPHB1|EGFR|ZAP7|EPHB2|CDK2	Low confidence	Low confidence
ACSL5	ProteomicsDB - ACSL5	https://www.proteomicsdb.org/proteomicsdb/#human/proteinDetails/84979/assay			x									Low confidence	Low confidence
ACTR2	ProteomicsDB - ACTR2	https://www.proteomicsdb.org/proteomicsdb/#human/proteinDetails/57269/assay			x									Low confidence	Low confidence
ACTR3	ProteomicsDB - ACTR3	https://www.proteomicsdb.org/proteomicsdb/#human/proteinDetails/57268/assay			x							x	LRRK2|NTRK1|TP53RK|PRKACB	High confidence	High confidence	5511
ACVR1	ProteomicsDB - ACVR1	https://www.proteomicsdb.org/proteomicsdb/#human/proteinDetails/58283/assay	x		x									High confidence	High confidence	4	High confidence
ACVR1B	ProteomicsDB - ACVR1B	https://www.proteomicsdb.org/proteomicsdb/#human/proteinDetails/55229/assay	x		x									High confidence	High confidence	1	High confidence
ACVR2B	ProteomicsDB - ACVR2B	https://www.proteomicsdb.org/proteomicsdb/#human/proteinDetails/59666/assay	x		x									High confidence	High confidence	253
ACVRL1	ProteomicsDB - ACVRL1	https://www.proteomicsdb.org/proteomicsdb/#human/proteinDetails/55254/assay	x		x									High confidence	High confidence	15
ADCK1	ProteomicsDB - ADCK1	https://www.proteomicsdb.org/proteomicsdb/#human/proteinDetails/69740/assay	x		x									High confidence	High confidence	24
ADCK3	ProteomicsDB - ADCK3	https://www.proteomicsdb.org/proteomicsdb/#human/proteinDetails/73833/assay	x	x	?									High confidence	High confidence	275	High confidence
ADCK5	ProteomicsDB - ADCK5	https://www.proteomicsdb.org/proteomicsdb/#human/proteinDetails/61799/assay	x		x									Low confidence	Low confidence
ADD2	ProteomicsDB - ADD2	https://www.proteomicsdb.org/proteomicsdb/#human/proteinDetails/55105/assay										x	FYN|ROCK|	Low confidence	Low confidence
ADK	ProteomicsDB - ADK	https://www.proteomicsdb.org/proteomicsdb/#human/proteinDetails/56823/assay			x	x								High confidence	High confidence	13
ADRBK1	ProteomicsDB - ADRBK1	https://www.proteomicsdb.org/proteomicsdb/#human/proteinDetails/54254/assay	x		x									High confidence	High confidence	170
ADSL	ProteomicsDB - ADSL	https://www.proteomicsdb.org/proteomicsdb/#human/proteinDetails/54723/assay			x									Low confidence	Low confidence
AFF1	ProteomicsDB - AFF1	https://www.proteomicsdb.org/proteomicsdb/#human/proteinDetails/56427/assay										x	CDK9|PIP4K2A|CAMKV	High confidence	High confidence	0.8
AFF4	ProteomicsDB - AFF4	https://www.proteomicsdb.org/proteomicsdb/#human/proteinDetails/84300/assay										x	CDK9|CAMKV|PIP4K2A|CDK15|GRK5	High confidence	High confidence	2
AGR2	ProteomicsDB - AGR2	https://www.proteomicsdb.org/proteomicsdb/#human/proteinDetails/51169/assay												High confidence			High confidence
AIMP1	ProteomicsDB - AIMP1	https://www.proteomicsdb.org/proteomicsdb/#human/proteinDetails/59011/assay												High confidence	High confidence	3181
AK2	ProteomicsDB - AK2	https://www.proteomicsdb.org/proteomicsdb/#human/proteinDetails/56726/assay			x	x								High confidence	High confidence	1036
AKAP9	ProteomicsDB - AKAP9	https://www.proteomicsdb.org/proteomicsdb/#human/proteinDetails/78566/assay												High confidence			High confidence
AKR1C3	ProteomicsDB - AKR1C3	https://www.proteomicsdb.org/proteomicsdb/#human/proteinDetails/55504/assay												Low confidence	Low confidence
AKT1	ProteomicsDB - AKT1	https://www.proteomicsdb.org/proteomicsdb/#human/proteinDetails/54800/assay	x		x									High confidence	High confidence	11
AKT2	ProteomicsDB - AKT2	https://www.proteomicsdb.org/proteomicsdb/#human/proteinDetails/54801/assay	x		x									High confidence	High confidence	21
AKT3	ProteomicsDB - AKT3	https://www.proteomicsdb.org/proteomicsdb/#human/proteinDetails/85641/assay	x		x									High confidence	High confidence	7
ALK	ProteomicsDB - ALK	https://www.proteomicsdb.org/proteomicsdb/#human/proteinDetails/85185/assay	x		x									Low confidence	Low confidence
AP1B1	ProteomicsDB - AP1B1	https://www.proteomicsdb.org/proteomicsdb/#human/proteinDetails/58857/assay										x	EGFR|NTRK1|PRKDC|ATR|NTRK2|CDK2|ATM	Low confidence	Low confidence
AP1G1	ProteomicsDB - AP1G1	https://www.proteomicsdb.org/proteomicsdb/#human/proteinDetails/49146/assay			x									High confidence	High confidence	302
AP2A1	ProteomicsDB - AP2A1	https://www.proteomicsdb.org/proteomicsdb/#human/proteinDetails/51043/assay										x	AAK1|EGFR|GAK|NTRK1|ABL1|CRK|GRK5|CSNK1E|EPHA2	High confidence	High confidence	21
AP2A2	ProteomicsDB - AP2A2	https://www.proteomicsdb.org/proteomicsdb/#human/proteinDetails/50592/assay										x	EGFR|NTRK1|GAK|GRK5|PIP5K1C	High confidence	High confidence	28
AP2B1	ProteomicsDB - AP2B1	https://www.proteomicsdb.org/proteomicsdb/#human/proteinDetails/57469/assay										x	EGFR|TGFBR2|BUB1B|NTRK1|AAK1|GAK|EPHA2|ABL1|ERBB2|TGFBR1|PIP5K1C	High confidence	High confidence	20
AP2M1	ProteomicsDB - AP2M1	https://www.proteomicsdb.org/proteomicsdb/#human/proteinDetails/76229/assay										x	EGFR|AAK1|(BCR)|BMP2K|GAK|MARK2|PRKACB|ABL1|CSNK1E|CDK11B|STK11|EPHA2|PRKDC	High confidence	High confidence	194
APRT	ProteomicsDB - APRT	https://www.proteomicsdb.org/proteomicsdb/#human/proteinDetails/52026/assay			x									Low confidence	Low confidence
ARAF	ProteomicsDB - ARAF	https://www.proteomicsdb.org/proteomicsdb/#human/proteinDetails/52601/assay	x		x									High confidence	High confidence	47
ATR	ProteomicsDB - ATR	https://www.proteomicsdb.org/proteomicsdb/#human/proteinDetails/59521/assay	x		x									Low confidence	Low confidence
AURKA	ProteomicsDB - AURKA	https://www.proteomicsdb.org/proteomicsdb/#human/proteinDetails/48339/assay	x		x									High confidence	High confidence	0.1		Low confidence
AURKB	ProteomicsDB - AURKB	https://www.proteomicsdb.org/proteomicsdb/#human/proteinDetails/76623/assay	x		x									High confidence	High confidence	2		High confidence
AXL	ProteomicsDB - AXL	https://www.proteomicsdb.org/proteomicsdb/#human/proteinDetails/54712/assay	x		x									High confidence				High confidence
AZI2	ProteomicsDB - AZI2	https://www.proteomicsdb.org/proteomicsdb/#human/proteinDetails/81026/assay										x	TBK1|IKBKE	High confidence	High confidence	54
BAG2	ProteomicsDB - BAG2	https://www.proteomicsdb.org/proteomicsdb/#human/proteinDetails/51064/assay												Low confidence			Low confidence
BCR	ProteomicsDB - BCR	https://www.proteomicsdb.org/proteomicsdb/#human/proteinDetails/52729/assay			x							x	ABL1	High confidence	High confidence	1		High confidence
BLVRB	ProteomicsDB - BLVRB	https://www.proteomicsdb.org/proteomicsdb/#human/proteinDetails/54623/assay												Low confidence			Low confidence
BMP2K	ProteomicsDB - BMP2K	https://www.proteomicsdb.org/proteomicsdb/#human/proteinDetails/82594/assay	x		x									High confidence	High confidence	0.8	High confidence
BMPR1A	ProteomicsDB - BMPR1A	https://www.proteomicsdb.org/proteomicsdb/#human/proteinDetails/55228/assay	x		x									High confidence	High confidence	60
BMPR1B	ProteomicsDB - BMPR1B	https://www.proteomicsdb.org/proteomicsdb/#human/proteinDetails/47802/assay	x		x									High confidence	High confidence	2
BMPR2	ProteomicsDB - BMPR2	https://www.proteomicsdb.org/proteomicsdb/#human/proteinDetails/59705/assay	x		x									High confidence	High confidence	3
BRAF	ProteomicsDB - BRAF	https://www.proteomicsdb.org/proteomicsdb/#human/proteinDetails/53102/assay	x		x									High confidence	High confidence	3
BRD4	ProteomicsDB - BRD4	https://www.proteomicsdb.org/proteomicsdb/#human/proteinDetails/49651/assay										x	CDK9|PIP4K2A|CSMKV	Low confidence	Low confidence
BRD4;BRD3	ProteomicsDB - BRD4	https://www.proteomicsdb.org/proteomicsdb/#human/proteinDetails/49651/assay										x	CDK9|PIP4K2A|CSMKV	Low confidence	Low confidence
BTK	ProteomicsDB - BTK	https://www.proteomicsdb.org/proteomicsdb/#human/proteinDetails/58419/assay	x		x									High confidence	High confidence	3	High confidence	High confidence
BUB1	ProteomicsDB - BUB1	https://www.proteomicsdb.org/proteomicsdb/#human/proteinDetails/49112/assay	x		x									High confidence	High confidence	94	High confidence
C2CD5	ProteomicsDB - C2CD5	https://www.proteomicsdb.org/proteomicsdb/#human/proteinDetails/70464/assay										x	CDK5|CDK2|NTRK1|LCK	High confidence	High confidence	7
CAB39	ProteomicsDB - CAB39	https://www.proteomicsdb.org/proteomicsdb/#human/proteinDetails/85981/assay										x	STK11|STRADB|STRADA|STK25|PIP4K2A	High confidence	High confidence	50
CABLES1	ProteomicsDB - CABLES1	https://www.proteomicsdb.org/proteomicsdb/#human/proteinDetails/74310/assay										x	CDK5	High confidence	High confidence	10
CACYBP	ProteomicsDB - CACYBP	https://www.proteomicsdb.org/proteomicsdb/#human/proteinDetails/81499/assay												Low confidence			Low confidence
CALM1	ProteomicsDB - CALM1	https://www.proteomicsdb.org/proteomicsdb/#human/proteinDetails/57368/assay												Low confidence	Low confidence
CALR	ProteomicsDB - CALR	https://www.proteomicsdb.org/proteomicsdb/#human/proteinDetails/54410/assay										x	NTRK1|PRKACA|MAPK6|GRK5|CDK2|EEF2K	Low confidence	Low confidence
CAMK1G	ProteomicsDB - CAMK1G	https://www.proteomicsdb.org/proteomicsdb/#human/proteinDetails/77570/assay	x		x									High confidence	High confidence	117
CAMK2B	ProteomicsDB - CAMK2B	https://www.proteomicsdb.org/proteomicsdb/#human/proteinDetails/59530/assay	x		x									High confidence			High confidence
CAMK2D	ProteomicsDB - CAMK2D	https://www.proteomicsdb.org/proteomicsdb/#human/proteinDetails/59548/assay	x		x									High confidence	High confidence	19
CAMK2G	ProteomicsDB - CAMK2G	https://www.proteomicsdb.org/proteomicsdb/#human/proteinDetails/59538/assay	x		x									High confidence	High confidence	18
CAMK4	ProteomicsDB - CAMK4	https://www.proteomicsdb.org/proteomicsdb/#human/proteinDetails/60921/assay	x		x									High confidence	High confidence	196
CAMKK2	ProteomicsDB - CAMKK2	https://www.proteomicsdb.org/proteomicsdb/#human/proteinDetails/78009/assay	x		x									High confidence	High confidence	30	High confidence
CAPNS1	ProteomicsDB - CAPNS1	https://www.proteomicsdb.org/proteomicsdb/#human/proteinDetails/51727/assay										x	PAK2|CDK4|STK24	Low confidence	Low confidence
CAPZA1	ProteomicsDB - CAPZA1	https://www.proteomicsdb.org/proteomicsdb/#human/proteinDetails/56550/assay										x	MARK2|NTRK1|LRRK2|MARK3|RPS6KB2	Low confidence	Low confidence
CARS	ProteomicsDB - CARS	https://www.proteomicsdb.org/proteomicsdb/#human/proteinDetails/56023/assay			x							x	NTRK1	High confidence	High confidence	652
CBR1	ProteomicsDB - CBR1	https://www.proteomicsdb.org/proteomicsdb/#human/proteinDetails/53298/assay												Low confidence	Low confidence
CCAR2	ProteomicsDB - CCAR2	https://www.proteomicsdb.org/proteomicsdb/#human/proteinDetails/71566/assay										x	CDK9|NTRK1|CHEK2|CDK7|NEK6	High confidence	High confidence	3261
CCDC47	ProteomicsDB - CCDC47	https://www.proteomicsdb.org/proteomicsdb/#human/proteinDetails/75902/assay										x	IRAK1|NTRK1|ILK	Low confidence	Low confidence
CCNA2	ProteomicsDB - CCNA2	https://www.proteomicsdb.org/proteomicsdb/#human/proteinDetails/53735/assay										x	CDK2|CDK1|CDK7|CDK4|CDK5|CDK3|PKMYT1|CDK1|CDK6|TP53|DYRK1A|DYRK1B	High confidence	High confidence	109
CCNB1	ProteomicsDB - CCNB1	https://www.proteomicsdb.org/proteomicsdb/#human/proteinDetails/53068/assay										x	CDK1|CDK2|CDK5|CDK7|PRKDC|PKMYT1|TGFBR2|CDK3	High confidence	High confidence	57
CCNB2	ProteomicsDB - CCNB2	https://www.proteomicsdb.org/proteomicsdb/#human/proteinDetails/50636/assay										x	CDK1|CDK2|CDK7|PKMYT1|ATR|TGFBR2|	High confidence	High confidence	18
CCNE1	ProteomicsDB - CCNE1	https://www.proteomicsdb.org/proteomicsdb/#human/proteinDetails/54236/assay										x	CDK2|CDK1|GSK3B|CDK3|CDK5|CDK7|CDK4|CDK6	High confidence	High confidence	4	Low confidence
CCNE2	ProteomicsDB - CCNE2	https://www.proteomicsdb.org/proteomicsdb/#human/proteinDetails/51213/assay										x	CDK2|CDKN1A|CDKN1B|CDK3	Low confidence	Low confidence
CCNH	ProteomicsDB - CCNH	https://www.proteomicsdb.org/proteomicsdb/#human/proteinDetails/56451/assay										x	CDK7|CDK2|CDK2|CDK8|CDK9	High confidence	High confidence	5
CCNI	ProteomicsDB - CCNI	https://www.proteomicsdb.org/proteomicsdb/#human/proteinDetails/59809/assay										x	CDK5|AKT1	High confidence	High confidence	141
CCNK	ProteomicsDB - CCNK	https://www.proteomicsdb.org/proteomicsdb/#human/proteinDetails/50259/assay										x	CDK9|CDK12|CDK13|CDK1|CDK18	High confidence	High confidence	30
CCNT1	ProteomicsDB - CCNT1	https://www.proteomicsdb.org/proteomicsdb/#human/proteinDetails/49468/assay										x	CDK9|CDK6|NTRK1|PIP4K2A|	High confidence	High confidence	0.6
CCNT2	ProteomicsDB - CCNT2	https://www.proteomicsdb.org/proteomicsdb/#human/proteinDetails/49477/assay										x	CDK9|PKN1|CDK6|	High confidence	High confidence	3
CDC23	ProteomicsDB - CDC23	https://www.proteomicsdb.org/proteomicsdb/#human/proteinDetails/84679/assay										x	NEK2|bub1b|MAPK3	Low confidence	Low confidence
CDC42BPA	ProteomicsDB - CDC42BPA	https://www.proteomicsdb.org/proteomicsdb/#human/proteinDetails/65291/assay	x		x									High confidence	High confidence	10
CDC42BPB	ProteomicsDB - CDC42BPB	https://www.proteomicsdb.org/proteomicsdb/#human/proteinDetails/86490/assay	x		x									High confidence	High confidence	16
CDC42BPG	ProteomicsDB - CDC42BPG	https://www.proteomicsdb.org/proteomicsdb/#human/proteinDetails/66255/assay	x		x									High confidence	High confidence	269
CDC7	ProteomicsDB - CDC7	https://www.proteomicsdb.org/proteomicsdb/#human/proteinDetails/47836/assay	x		x									High confidence	High confidence	3993	High confidence
CDK1	ProteomicsDB - CDK1	https://www.proteomicsdb.org/proteomicsdb/#human/proteinDetails/51905/assay	x		x									High confidence	High confidence	77
CDK10	ProteomicsDB - CDK10	https://www.proteomicsdb.org/proteomicsdb/#human/proteinDetails/60454/assay	x		x									Low confidence	Low confidence
CDK12	ProteomicsDB - CDK12	https://www.proteomicsdb.org/proteomicsdb/#human/proteinDetails/83279/assay	x		x									High confidence	High confidence	32
CDK13	ProteomicsDB - CDK13	https://www.proteomicsdb.org/proteomicsdb/#human/proteinDetails/59786/assay	x		x									High confidence	High confidence	21
CDK16	ProteomicsDB - CDK16	https://www.proteomicsdb.org/proteomicsdb/#human/proteinDetails/57854/assay	x		x									High confidence	High confidence	3
CDK17	ProteomicsDB - CDK17	https://www.proteomicsdb.org/proteomicsdb/#human/proteinDetails/57855/assay	x		x									High confidence	High confidence	2		Low confidence
CDK18	ProteomicsDB - CDK18	https://www.proteomicsdb.org/proteomicsdb/#human/proteinDetails/58495/assay	x		x									High confidence	High confidence	67
CDK2	ProteomicsDB - CDK2	https://www.proteomicsdb.org/proteomicsdb/#human/proteinDetails/54241/assay	x		x									High confidence	High confidence	5
CDK3	ProteomicsDB - CDK3	https://www.proteomicsdb.org/proteomicsdb/#human/proteinDetails/57848/assay	x		x									High confidence	High confidence	8
CDK4	ProteomicsDB - CDK4	https://www.proteomicsdb.org/proteomicsdb/#human/proteinDetails/52805/assay	x		x									High confidence	High confidence	97
CDK5	ProteomicsDB - CDK5	https://www.proteomicsdb.org/proteomicsdb/#human/proteinDetails/57852/assay	x		x									High confidence	High confidence	12
CDK6	ProteomicsDB - CDK6	https://www.proteomicsdb.org/proteomicsdb/#human/proteinDetails/57851/assay	x		x									High confidence	High confidence	32
CDK7	ProteomicsDB - CDK7	https://www.proteomicsdb.org/proteomicsdb/#human/proteinDetails/56258/assay	x		x									High confidence	High confidence	3
CDK9	ProteomicsDB - CDK9	https://www.proteomicsdb.org/proteomicsdb/#human/proteinDetails/56263/assay	x		x									High confidence	High confidence	1
CDKL5	ProteomicsDB - CDKL5	https://www.proteomicsdb.org/proteomicsdb/#human/proteinDetails/50359/assay	x		x									High confidence	High confidence	20	High confidence
CERS2	ProteomicsDB - CERS2	https://www.proteomicsdb.org/proteomicsdb/#human/proteinDetails/76584/assay												High confidence	High confidence	2248
CHD4	ProteomicsDB - CHD4	https://www.proteomicsdb.org/proteomicsdb/#human/proteinDetails/60204/assay			x		x							Low confidence	Low confidence
CHEK1	ProteomicsDB - CHEK1	https://www.proteomicsdb.org/proteomicsdb/#human/proteinDetails/48208/assay	x		x									High confidence	High confidence	0.2	High confidence
CIT	ProteomicsDB - CIT	https://www.proteomicsdb.org/proteomicsdb/#human/proteinDetails/48094/assay	x		x									High confidence	High confidence	3	High confidence
CKAP5	ProteomicsDB - CKAP5	https://www.proteomicsdb.org/proteomicsdb/#human/proteinDetails/59791/assay										x	NTRK1|CLK1|GRK5|CDK9|EPHA1	High confidence	High confidence	65
CKS1B	ProteomicsDB - CKS1B	https://www.proteomicsdb.org/proteomicsdb/#human/proteinDetails/57254/assay										x	CDK2|CDK1|CDK3|ICK|PKMYT1	High confidence	High confidence	9
CLIC1	ProteomicsDB - CLIC1	https://www.proteomicsdb.org/proteomicsdb/#human/proteinDetails/47828/assay												Low confidence			Low confidence
CLK1	ProteomicsDB - CLK1	https://www.proteomicsdb.org/proteomicsdb/#human/proteinDetails/56090/assay	x		x									High confidence	High confidence	7	Low confidence		High confidence
CLK2	ProteomicsDB - CLK2	https://www.proteomicsdb.org/proteomicsdb/#human/proteinDetails/56093/assay	x		x									High confidence	High confidence	0.4
CLK3	ProteomicsDB - CLK3	https://www.proteomicsdb.org/proteomicsdb/#human/proteinDetails/56096/assay	x		x									High confidence	High confidence	10	Low confidence
CLK4	ProteomicsDB - CLK4	https://www.proteomicsdb.org/proteomicsdb/#human/proteinDetails/81459/assay	x		x									High confidence	High confidence	13
CLTCL1	ProteomicsDB - CLTCL1	https://www.proteomicsdb.org/proteomicsdb/#human/proteinDetails/56608/assay												Low confidence			Low confidence
CMPK1	ProteomicsDB - CMPK1	https://www.proteomicsdb.org/proteomicsdb/#human/proteinDetails/54633/assay			x	x								High confidence	High confidence	3
CNOT2	ProteomicsDB - CNOT2	https://www.proteomicsdb.org/proteomicsdb/#human/proteinDetails/83462/assay										x	NLK|AURKA	Low confidence	Low confidence
COG1	ProteomicsDB - COG1	https://www.proteomicsdb.org/proteomicsdb/#human/proteinDetails/74609/assay										x	NTRK1	Low confidence	Low confidence
COMT	ProteomicsDB - COMT	https://www.proteomicsdb.org/proteomicsdb/#human/proteinDetails/53945/assay												High confidence	High confidence	4103
COX6C	ProteomicsDB - COX6C	https://www.proteomicsdb.org/proteomicsdb/#human/proteinDetails/52263/assay												Low confidence	Low confidence
CSK	ProteomicsDB - CSK	https://www.proteomicsdb.org/proteomicsdb/#human/proteinDetails/55450/assay	x		x									High confidence	High confidence	22	Low confidence
CSNK1A1	ProteomicsDB - CSNK1A1	https://www.proteomicsdb.org/proteomicsdb/#human/proteinDetails/55928/assay	x		x									High confidence	High confidence	766	High confidence
CSNK1D	ProteomicsDB - CSNK1D	https://www.proteomicsdb.org/proteomicsdb/#human/proteinDetails/55930/assay	x		x									High confidence	High confidence	152
CSNK1E	ProteomicsDB - CSNK1E	https://www.proteomicsdb.org/proteomicsdb/#human/proteinDetails/56045/assay	x		x									High confidence	High confidence	158	High confidence
CSNK1G1	ProteomicsDB - CSNK1G1	https://www.proteomicsdb.org/proteomicsdb/#human/proteinDetails/81782/assay	x		x									High confidence	High confidence	53
CSNK1G2	ProteomicsDB - CSNK1G2	https://www.proteomicsdb.org/proteomicsdb/#human/proteinDetails/57596/assay	x		x									High confidence	High confidence	105
CSNK1G3	ProteomicsDB - CSNK1G3	https://www.proteomicsdb.org/proteomicsdb/#human/proteinDetails/86730/assay	x		x									High confidence	High confidence	97
CSNK2A1;CSNK2A3	ProteomicsDB - CSNK2A1	https://www.proteomicsdb.org/proteomicsdb/#human/proteinDetails/57536/assay	x		x									High confidence	High confidence	0.3	High confidence
CSNK2A2	ProteomicsDB - CSNK2A2	https://www.proteomicsdb.org/proteomicsdb/#human/proteinDetails/53686/assay	x		x									High confidence	High confidence	1	High confidence
CSNK2B	ProteomicsDB - CSNK2B	https://www.proteomicsdb.org/proteomicsdb/#human/proteinDetails/57524/assay										x	CSNK2A1|CSNK2A2	High confidence	High confidence	0.2	Low confidence
CTTN	ProteomicsDB - CTTN	https://www.proteomicsdb.org/proteomicsdb/#human/proteinDetails/59947/assay										x	EGFR|FER|MYLK|TNK2|SYK|NTRK1|PTK2	Low confidence	Low confidence
CYC1	ProteomicsDB - CYC1	https://www.proteomicsdb.org/proteomicsdb/#human/proteinDetails/52124/assay									x	x	NTRK1	Low confidence	Low confidence
DBI	ProteomicsDB - DBI	https://www.proteomicsdb.org/proteomicsdb/#human/proteinDetails/51954/assay												Low confidence	Low confidence
DCAF7	ProteomicsDB - DCAF7	https://www.proteomicsdb.org/proteomicsdb/#human/proteinDetails/57346/assay										x	DYRK1A|DYRK1B|HIPK2|MAP3K1|CSNK2A1|CSNK2A2|DYRK2|AURKA|PRKACB|PRKACA|LATS2	High confidence	High confidence	11
DCK	ProteomicsDB - DCK	https://www.proteomicsdb.org/proteomicsdb/#human/proteinDetails/54408/assay			x	x						x	NTRK1	High confidence	High confidence	12
DCTPP1	ProteomicsDB - DCTPP1	https://www.proteomicsdb.org/proteomicsdb/#human/proteinDetails/81085/assay			x							x	PLK1	High confidence	High confidence	573
DDB1	ProteomicsDB - DDB1	https://www.proteomicsdb.org/proteomicsdb/#human/proteinDetails/60895/assay										x	CHEK1|GRK5|AURKB|DYRK1B|AURKA|NTRK1|ATM|MTOR|ABL1|GRK6	High confidence	High confidence	79
DDR1	ProteomicsDB - DDR1	https://www.proteomicsdb.org/proteomicsdb/#human/proteinDetails/58595/assay	x		x									High confidence	High confidence	3	High confidence	High confidence
DDR2	ProteomicsDB - DDR2	https://www.proteomicsdb.org/proteomicsdb/#human/proteinDetails/61095/assay	x		x									High confidence	High confidence	4		High confidence
DDT;DDTL	ProteomicsDB - DDT	https://www.proteomicsdb.org/proteomicsdb/#human/proteinDetails/54626/assay												Low confidence	Low confidence		Low confidence
DDX1	ProteomicsDB - DDX1	https://www.proteomicsdb.org/proteomicsdb/#human/proteinDetails/75269/assay			x		x							Low confidence	Low confidence
DDX19A	ProteomicsDB - DDX19A	https://www.proteomicsdb.org/proteomicsdb/#human/proteinDetails/82721/assay			x		x							High confidence					High confidence
DDX31	ProteomicsDB - DDX31	https://www.proteomicsdb.org/proteomicsdb/#human/proteinDetails/81209/assay			x		x							High confidence			High confidence
DDX3X	ProteomicsDB - DDX3X	https://www.proteomicsdb.org/proteomicsdb/#human/proteinDetails/47982/assay			x		x		x			x	NTRK1|SRPK2|RPS6KB2|CDK2|ILK|BTK|IKBKE|CSNK2A1	Low confidence	Low confidence
DDX42	ProteomicsDB - DDX42	https://www.proteomicsdb.org/proteomicsdb/#human/proteinDetails/70312/assay			x		x					x	NTRK1|RPS6KA4	Low confidence	Low confidence
DDX6	ProteomicsDB - DDX6	https://www.proteomicsdb.org/proteomicsdb/#human/proteinDetails/54313/assay			x		x							Low confidence	Low confidence
DHCR24	ProteomicsDB - DHCR24	https://www.proteomicsdb.org/proteomicsdb/#human/proteinDetails/60562/assay								x		x	IKBK|EGFR	High confidence	High confidence	432
DHX30	ProteomicsDB - DHX30	https://www.proteomicsdb.org/proteomicsdb/#human/proteinDetails/68758/assay			x		x					x	EIF2AK2|NTRK1|GRK5	Low confidence	Low confidence
DKC1	ProteomicsDB - DKC1	https://www.proteomicsdb.org/proteomicsdb/#human/proteinDetails/49624/assay										x	NTRK1|CSNK2A1	Low confidence	Low confidence
DMPK	ProteomicsDB - DMPK	https://www.proteomicsdb.org/proteomicsdb/#human/proteinDetails/58699/assay	x		x									High confidence			High confidence
DNAJA1	ProteomicsDB - DNAJA1	https://www.proteomicsdb.org/proteomicsdb/#human/proteinDetails/54799/assay			x									High confidence	High confidence	962
DNAJB11	ProteomicsDB - DNAJB11	https://www.proteomicsdb.org/proteomicsdb/#human/proteinDetails/84046/assay										x	ROCK2|ILK|ERBB3|NTRK1	Low confidence	Low confidence
DNAJC3	ProteomicsDB - DNAJC3	https://www.proteomicsdb.org/proteomicsdb/#human/proteinDetails/59230/assay										x	EIF2AK2|EIF2AK3	Low confidence	Low confidence
DNAJC9	ProteomicsDB - DNAJC9	https://www.proteomicsdb.org/proteomicsdb/#human/proteinDetails/75112/assay										x	NTRK1	Low confidence	Low confidence
DSG1	ProteomicsDB - DSG1	https://www.proteomicsdb.org/proteomicsdb/#human/proteinDetails/58089/assay												Low confidence			Low confidence
DYNLL1	ProteomicsDB - DYNLL1	https://www.proteomicsdb.org/proteomicsdb/#human/proteinDetails/57501/assay										x	PAK1|NEK9|PRKACB|PRKCZ|TLK1|TLK2|MASTL|MAST1|NEK6|DYRK1B|DYRK1A|GSK3B|STK26|STK24|CSNK1A1|PRKACA|STK25	High confidence	High confidence	29
DYNLL2	ProteomicsDB - DYNLL2	https://www.proteomicsdb.org/proteomicsdb/#human/proteinDetails/76535/assay										x	PAK1|NEK9|CSNK1A1|DYRK1A	High confidence	High confidence	112
DYRK1A	ProteomicsDB - DYRK1A	https://www.proteomicsdb.org/proteomicsdb/#human/proteinDetails/59619/assay	x		x									High confidence	High confidence	10
DYRK1B	ProteomicsDB - DYRK1B	https://www.proteomicsdb.org/proteomicsdb/#human/proteinDetails/86110/assay	x		x									Low confidence	Low confidence		Low confidence
EFS	ProteomicsDB - EFS	https://www.proteomicsdb.org/proteomicsdb/#human/proteinDetails/48850/assay												High confidence			High confidence
EGFR	ProteomicsDB - EGFR	https://www.proteomicsdb.org/proteomicsdb/#human/proteinDetails/51261/assay	x		x									High confidence	High confidence	1	High confidence
EIF2AK1	ProteomicsDB - EIF2AK1	https://www.proteomicsdb.org/proteomicsdb/#human/proteinDetails/78682/assay	x		x									High confidence	High confidence	170
EIF2B1	ProteomicsDB - EIF2B1	https://www.proteomicsdb.org/proteomicsdb/#human/proteinDetails/59934/assay										x	NTRK1|STK11|EGFR	Low confidence	Low confidence
EIF2S3;EIF2S3L	ProteomicsDB - EIF2S3	https://www.proteomicsdb.org/proteomicsdb/#human/proteinDetails/55399/assay			x			x				x	NTRK1|CDK2|GRK5|MAPK6	Low confidence	Low confidence
EIF3I	ProteomicsDB - EIF3I	https://www.proteomicsdb.org/proteomicsdb/#human/proteinDetails/59333/assay												High confidence			High confidence
EIF3J	ProteomicsDB - EIF3J	https://www.proteomicsdb.org/proteomicsdb/#human/proteinDetails/50215/assay										x	CSNK2A1|CSNK2A2|NTRK1	High confidence	High confidence	0.7	High confidence
EIF3M	ProteomicsDB - EIF3M	https://www.proteomicsdb.org/proteomicsdb/#human/proteinDetails/68761/assay												Low confidence	Low confidence
EIF4G1	ProteomicsDB - EIF4G1	https://www.proteomicsdb.org/proteomicsdb/#human/proteinDetails/58250/assay												High confidence	High confidence	1304
EIF5B	ProteomicsDB - EIF5B	https://www.proteomicsdb.org/proteomicsdb/#human/proteinDetails/49628/assay			x			x						Low confidence	Low confidence
EPHA1	ProteomicsDB - EPHA1	https://www.proteomicsdb.org/proteomicsdb/#human/proteinDetails/53891/assay	x		x									High confidence	High confidence	5	High confidence	Low confidence
EPHA2	ProteomicsDB - EPHA2	https://www.proteomicsdb.org/proteomicsdb/#human/proteinDetails/54535/assay	x		x									High confidence	High confidence	1	High confidence	High confidence
EPHA4	ProteomicsDB - EPHA4	https://www.proteomicsdb.org/proteomicsdb/#human/proteinDetails/56717/assay	x		x									High confidence	High confidence	2	High confidence	High confidence
EPHA5	ProteomicsDB - EPHA5	https://www.proteomicsdb.org/proteomicsdb/#human/proteinDetails/56712/assay	x		x									High confidence	High confidence	0.4		High confidence
EPHA7	ProteomicsDB - EPHA7	https://www.proteomicsdb.org/proteomicsdb/#human/proteinDetails/60549/assay	x		x									High confidence	High confidence	8	Low confidence	High confidence
EPHB2	ProteomicsDB - EPHB2	https://www.proteomicsdb.org/proteomicsdb/#human/proteinDetails/54540/assay	x		x									High confidence	High confidence	2	High confidence	High confidence
EPHB3	ProteomicsDB - EPHB3	https://www.proteomicsdb.org/proteomicsdb/#human/proteinDetails/56711/assay	x		x									High confidence	High confidence	2	High confidence	Low confidence
EPHB4	ProteomicsDB - EPHB4	https://www.proteomicsdb.org/proteomicsdb/#human/proteinDetails/56715/assay	x		x									High confidence	High confidence	0.9	High confidence	High confidence
EPHB6	ProteomicsDB - EPHB6	https://www.proteomicsdb.org/proteomicsdb/#human/proteinDetails/48502/assay	x	x	?									High confidence	High confidence	0.6		High confidence
ERBB3	ProteomicsDB - ERBB3	https://www.proteomicsdb.org/proteomicsdb/#human/proteinDetails/53934/assay	x		x									High confidence			High confidence
ERBB4	ProteomicsDB - ERBB4	https://www.proteomicsdb.org/proteomicsdb/#human/proteinDetails/60520/assay	x											High confidence			High confidence
ERCC2	ProteomicsDB - ERCC2	https://www.proteomicsdb.org/proteomicsdb/#human/proteinDetails/53542/assay			x		x					x	CDK7|NTRK1	High confidence	High confidence	2
ERLIN2	ProteomicsDB - ERLIN2	https://www.proteomicsdb.org/proteomicsdb/#human/proteinDetails/50538/assay										x	NTRK1|STK3	Low confidence	Low confidence
ERN1	ProteomicsDB - ERN1	https://www.proteomicsdb.org/proteomicsdb/#human/proteinDetails/50021/assay	x		x									High confidence	High confidence	19
ERN2	ProteomicsDB - ERN2	https://www.proteomicsdb.org/proteomicsdb/#human/proteinDetails/68688/assay	x		x									High confidence	High confidence	292		Low confidence
ETF1	ProteomicsDB - ETF1	https://www.proteomicsdb.org/proteomicsdb/#human/proteinDetails/57403/assay												Low confidence	Low confidence
ETFB	ProteomicsDB - ETFB	https://www.proteomicsdb.org/proteomicsdb/#human/proteinDetails/55282/assay			x					x		x	NTRK1|PRKACB	Low confidence	Low confidence
EWSR1	ProteomicsDB - EWSR1	https://www.proteomicsdb.org/proteomicsdb/#human/proteinDetails/58004/assay			x									Low confidence	Low confidence
EXOC4	ProteomicsDB - EXOC4	https://www.proteomicsdb.org/proteomicsdb/#human/proteinDetails/75923/assay										x	NTRK1|EGFR	High confidence	High confidence	544
EZR	ProteomicsDB - EZR	https://www.proteomicsdb.org/proteomicsdb/#human/proteinDetails/53128/assay												Low confidence				Low confidence
FADS2	ProteomicsDB - FADS2	https://www.proteomicsdb.org/proteomicsdb/#human/proteinDetails/51097/assay										x	EGFR|NTRK1	Low confidence	Low confidence
FAH	ProteomicsDB - FAH	https://www.proteomicsdb.org/proteomicsdb/#human/proteinDetails/53401/assay										x	EGFR	Low confidence	Low confidence
FAM111A	ProteomicsDB - FAM111A	https://www.proteomicsdb.org/proteomicsdb/#human/proteinDetails/77794/assay												Low confidence			Low confidence
FAM58A;FAM58BP	ProteomicsDB - FAM58A	https://www.proteomicsdb.org/proteomicsdb/#human/proteinDetails/71580/assay										x	CDK10	High confidence	High confidence	19
FAM83A	ProteomicsDB - FAM83A	https://www.proteomicsdb.org/proteomicsdb/#human/proteinDetails/69935/assay										x		High confidence	High confidence	404
FAM83B	ProteomicsDB - FAM83B	https://www.proteomicsdb.org/proteomicsdb/#human/proteinDetails/64210/assay										x	GAK|CSNK1E|CSNK1A1	High confidence	High confidence	375	High confidence
FAM83E	ProteomicsDB - FAM83E	https://www.proteomicsdb.org/proteomicsdb/#human/proteinDetails/61353/assay												High confidence			High confidence
FAM92B	ProteomicsDB - FAM92B	https://www.proteomicsdb.org/proteomicsdb/#human/proteinDetails/68290/assay												Low confidence	Low confidence
FANCD2	ProteomicsDB - FANCD2	https://www.proteomicsdb.org/proteomicsdb/#human/proteinDetails/79531/assay										x	ATM|NTRK1|ATR|CDK2	Low confidence	Low confidence
FANCI	ProteomicsDB - FANCI	https://www.proteomicsdb.org/proteomicsdb/#human/proteinDetails/82811/assay										x	ILK|NTRK1|ATM|NEK6|CAMKK2	High confidence	High confidence	96
FARSB	ProteomicsDB - FARSB	https://www.proteomicsdb.org/proteomicsdb/#human/proteinDetails/82538/assay			x							x	NTRK1|EIF2AK2	Low confidence	Low confidence
FDPS	ProteomicsDB - FDPS	https://www.proteomicsdb.org/proteomicsdb/#human/proteinDetails/53046/assay										x	FGFR1|NTRK1|IGF1R|EGFR	Low confidence	Low confidence
FECH	ProteomicsDB - FECH	https://www.proteomicsdb.org/proteomicsdb/#human/proteinDetails/54041/assay									x	x	ATM	High confidence	High confidence	783	High confidence	High confidence
FER	ProteomicsDB - FER	https://www.proteomicsdb.org/proteomicsdb/#human/proteinDetails/53382/assay	x		x									High confidence	High confidence	47	High confidence	High confidence
FES	ProteomicsDB - FES	https://www.proteomicsdb.org/proteomicsdb/#human/proteinDetails/51989/assay	x		x									High confidence	High confidence	127
FGFR1	ProteomicsDB - FGFR1	https://www.proteomicsdb.org/proteomicsdb/#human/proteinDetails/52745/assay	x		x									High confidence	High confidence	2
FGR	ProteomicsDB - FGR	https://www.proteomicsdb.org/proteomicsdb/#human/proteinDetails/52268/assay	x		x									High confidence	High confidence	5
FIBP	ProteomicsDB - FIBP	https://www.proteomicsdb.org/proteomicsdb/#human/proteinDetails/48941/assay										x	CDK5|GSK3B	High confidence	High confidence	10
FLNB	ProteomicsDB - FLNB	https://www.proteomicsdb.org/proteomicsdb/#human/proteinDetails/49938/assay										x	MAP2K4|CDK2|MAPK8|MAP3K1	High confidence	Low confidence			High confidence
FLT3	ProteomicsDB - FLT3	https://www.proteomicsdb.org/proteomicsdb/#human/proteinDetails/55226/assay	x		x									High confidence	High confidence	0.3		High confidence
FRK	ProteomicsDB - FRK	https://www.proteomicsdb.org/proteomicsdb/#human/proteinDetails/55538/assay	x		x									High confidence	High confidence	1		High confidence
FYN	ProteomicsDB - FYN	https://www.proteomicsdb.org/proteomicsdb/#human/proteinDetails/51877/assay	x		x									High confidence	High confidence	4
GAK	ProteomicsDB - GAK	https://www.proteomicsdb.org/proteomicsdb/#human/proteinDetails/48350/assay	x		x									High confidence	High confidence	0.3	High confidence
GAPVD1	ProteomicsDB - GAPVD1	https://www.proteomicsdb.org/proteomicsdb/#human/proteinDetails/60308/assay										x	CSNK1E|CSNK1D|AURKA|FGFR2|CSNK1A1|NTRK1|TSSK1B	High confidence	High confidence	136	High confidence
GARS	ProteomicsDB - GARS	https://www.proteomicsdb.org/proteomicsdb/#human/proteinDetails/55453/assay			x									High confidence	High confidence	40
GEMIN4	ProteomicsDB - GEMIN4	https://www.proteomicsdb.org/proteomicsdb/#human/proteinDetails/57005/assay										x	NTRK1|ILK|CDK4|GSK3B|GRK5	Low confidence	Low confidence
GFPT1	ProteomicsDB - GFPT1	https://www.proteomicsdb.org/proteomicsdb/#human/proteinDetails/58423/assay										x	NTRK1|PRKAB2|MAPK8|PRKAA2|	Low confidence	Low confidence
GHITM	ProteomicsDB - GHITM	https://www.proteomicsdb.org/proteomicsdb/#human/proteinDetails/80725/assay												Low confidence	Low confidence
GLO1	ProteomicsDB - GLO1	https://www.proteomicsdb.org/proteomicsdb/#human/proteinDetails/58281/assay										x	MAP3K13|IKBKG|	Low confidence	Low confidence
GNAI2	ProteomicsDB - GNAI2	https://www.proteomicsdb.org/proteomicsdb/#human/proteinDetails/51752/assay			x			x						Low confidence	Low confidence
GPI	ProteomicsDB - GPI	https://www.proteomicsdb.org/proteomicsdb/#human/proteinDetails/51924/assay												Low confidence				Low confidence
GRAMD1A	ProteomicsDB - GRAMD1A	https://www.proteomicsdb.org/proteomicsdb/#human/proteinDetails/76203/assay												High confidence	High confidence	2955
GRB2	ProteomicsDB - GRB2	https://www.proteomicsdb.org/proteomicsdb/#human/proteinDetails/57462/assay										x	cell surface growth facotr receptors	High confidence	High confidence	3		Low confidence
GRB7	ProteomicsDB - GRB7	https://www.proteomicsdb.org/proteomicsdb/#human/proteinDetails/59995/assay												High confidence			High confidence
GRK6	ProteomicsDB - GRK6	https://www.proteomicsdb.org/proteomicsdb/#human/proteinDetails/55602/assay	x		x									Low confidence	Low confidence
GSK3A	ProteomicsDB - GSK3A	https://www.proteomicsdb.org/proteomicsdb/#human/proteinDetails/56150/assay	x		x									High confidence	High confidence	6
GSK3B	ProteomicsDB - GSK3B	https://www.proteomicsdb.org/proteomicsdb/#human/proteinDetails/56151/assay	x		x									High confidence	High confidence	7
GSKIP	ProteomicsDB - GSKIP	https://www.proteomicsdb.org/proteomicsdb/#human/proteinDetails/83591/assay										x	GSK3B|GSK3A	High confidence	High confidence	2
GSPT2	ProteomicsDB - GSPT2	https://www.proteomicsdb.org/proteomicsdb/#human/proteinDetails/71156/assay			x			x				x	PIP4K2C|CLK3|CLK2|SMG1	Low confidence	Low confidence
GTPBP4	ProteomicsDB - GTPBP4	https://www.proteomicsdb.org/proteomicsdb/#human/proteinDetails/79822/assay			x			x				x	NTRK1|SRPK2|CSNK2A2|EIF2AK2	Low confidence	Low confidence
HBG1	ProteomicsDB - HBG1	https://www.proteomicsdb.org/proteomicsdb/#human/proteinDetails/57545/assay												Low confidence	Low confidence
HCK	ProteomicsDB - HCK	https://www.proteomicsdb.org/proteomicsdb/#human/proteinDetails/52142/assay	x		x									High confidence	High confidence	29		High confidence
HDAC6	ProteomicsDB - HDAC6	https://www.proteomicsdb.org/proteomicsdb/#human/proteinDetails/84019/assay												High confidence			High confidence
HIST2H2BE;HIST1H2BB;HIST1H2BO;HIST1H2BJ;HIST3H2BB;HIST1H2BA	ProteomicsDB - HIST2H2BE	https://www.proteomicsdb.org/proteomicsdb/#human/proteinDetails/61067/assay										x	HIPK2|STK4|CDK9|LATS2|STK38|AURKB|VRK1|MAP4K4|RPS6KA5|PRKACA|CDK2	Low confidence	Low confidence
HMOX2	ProteomicsDB - HMOX2	https://www.proteomicsdb.org/proteomicsdb/#human/proteinDetails/54710/assay									?			Low confidence	Low confidence
HNRNPH3	ProteomicsDB - HNRNPH3	https://www.proteomicsdb.org/proteomicsdb/#human/proteinDetails/54808/assay												Low confidence	Low confidence
HSP90AB2P	ProteomicsDB - HSP90AB2P	https://www.proteomicsdb.org/proteomicsdb/#human/proteinDetails/62623/assay			x									High confidence	High confidence	2566
HSP90B1	ProteomicsDB - HSP90B1	https://www.proteomicsdb.org/proteomicsdb/#human/proteinDetails/53067/assay			x				x					Low confidence				Low confidence
IARS2	ProteomicsDB - IARS2	https://www.proteomicsdb.org/proteomicsdb/#human/proteinDetails/82542/assay			x									Low confidence	Low confidence
ICK	ProteomicsDB - ICK	https://www.proteomicsdb.org/proteomicsdb/#human/proteinDetails/85480/assay	x		x									High confidence	High confidence	8
IGF1R	ProteomicsDB - IGF1R	https://www.proteomicsdb.org/proteomicsdb/#human/proteinDetails/52065/assay	x		x									High confidence	High confidence	5
IGF2BP3	ProteomicsDB - IGF2BP3	https://www.proteomicsdb.org/proteomicsdb/#human/proteinDetails/47882/assay										x	AURKA|EIF2AK2|NTRK1|CDK2|	Low confidence	Low confidence
IKBKE	ProteomicsDB - IKBKE	https://www.proteomicsdb.org/proteomicsdb/#human/proteinDetails/59892/assay	x		x									High confidence	High confidence	173	Low confidence	Low confidence
ILK	ProteomicsDB - ILK	https://www.proteomicsdb.org/proteomicsdb/#human/proteinDetails/59396/assay	x	x	?									Low confidence	Low confidence
IMPDH2	ProteomicsDB - IMPDH2	https://www.proteomicsdb.org/proteomicsdb/#human/proteinDetails/52839/assay			x							x	AKT1|CDK2|STKLD1|NTRK1|CLK1|IKBKE|MAPK1	Low confidence	Low confidence
INA	ProteomicsDB - INA	https://www.proteomicsdb.org/proteomicsdb/#human/proteinDetails/60861/assay										x	NTRK1	Low confidence	Low confidence
INCENP	ProteomicsDB - INCENP	https://www.proteomicsdb.org/proteomicsdb/#human/proteinDetails/82181/assay										x	AURKA|AURKB	High confidence	High confidence	11	High confidence	Low confidence
INPPL1	ProteomicsDB - INPPL1	https://www.proteomicsdb.org/proteomicsdb/#human/proteinDetails/48609/assay										x	ABL1|INSR|EGFR|NTRK1|MAP3K13|MET|LRRK1	High confidence	High confidence	0.9
INSR	ProteomicsDB - INSR	https://www.proteomicsdb.org/proteomicsdb/#human/proteinDetails/51872/assay	x		x									High confidence	High confidence	20
IPO7	ProteomicsDB - IPO7	https://www.proteomicsdb.org/proteomicsdb/#human/proteinDetails/50828/assay										x	RPS6KB2|NTRK1|CDK2|ILK	High confidence	High confidence	1690
IRAK1	ProteomicsDB - IRAK1	https://www.proteomicsdb.org/proteomicsdb/#human/proteinDetails/56349/assay	x		x									High confidence	High confidence	126		Low confidence
IRAK3	ProteomicsDB - IRAK3	https://www.proteomicsdb.org/proteomicsdb/#human/proteinDetails/86578/assay	x	x	?									High confidence	High confidence	7		High confidence
IRAK4	ProteomicsDB - IRAK4	https://www.proteomicsdb.org/proteomicsdb/#human/proteinDetails/83000/assay	x		x									High confidence	High confidence	9	High confidence
IRS2	ProteomicsDB - IRS2	https://www.proteomicsdb.org/proteomicsdb/#human/proteinDetails/86205/assay												High confidence					High confidence
JAK1	ProteomicsDB - JAK1	https://www.proteomicsdb.org/proteomicsdb/#human/proteinDetails/54097/assay	x	?	?									High confidence	High confidence	26
JAK2	ProteomicsDB - JAK2	https://www.proteomicsdb.org/proteomicsdb/#human/proteinDetails/49519/assay	x	?	?									High confidence	High confidence	5
KIAA0195	ProteomicsDB - KIAA0195	https://www.proteomicsdb.org/proteomicsdb/#human/proteinDetails/58909/assay										x	CDK5	High confidence	High confidence	9
KIT	ProteomicsDB - KIT	https://www.proteomicsdb.org/proteomicsdb/#human/proteinDetails/52640/assay	x		x									High confidence	High confidence	60
KLHL6	ProteomicsDB - KLHL6	https://www.proteomicsdb.org/proteomicsdb/#human/proteinDetails/75222/assay												High confidence	High confidence	53
LAGE3	ProteomicsDB - LAGE3	https://www.proteomicsdb.org/proteomicsdb/#human/proteinDetails/60095/assay										x	TP53RK	High confidence	High confidence	82
LASP1	ProteomicsDB - LASP1	https://www.proteomicsdb.org/proteomicsdb/#human/proteinDetails/60206/assay										x	ILK	High confidence	High confidence	913
LATS1	ProteomicsDB - LATS1	https://www.proteomicsdb.org/proteomicsdb/#human/proteinDetails/51081/assay	x		x									High confidence	High confidence	14
LCK	ProteomicsDB - LCK	https://www.proteomicsdb.org/proteomicsdb/#human/proteinDetails/51874/assay	x		x									High confidence	High confidence	2		High confidence
LIMK1	ProteomicsDB - LIMK1	https://www.proteomicsdb.org/proteomicsdb/#human/proteinDetails/56598/assay	x		x									High confidence	High confidence	26	High confidence	High confidence
LIMK2	ProteomicsDB - LIMK2	https://www.proteomicsdb.org/proteomicsdb/#human/proteinDetails/56602/assay	x		x									High confidence	High confidence	82	High confidence
LMAN1	ProteomicsDB - LMAN1	https://www.proteomicsdb.org/proteomicsdb/#human/proteinDetails/55977/assay										x	NTRK1	Low confidence	Low confidence
LSM3	ProteomicsDB - LSM3	https://www.proteomicsdb.org/proteomicsdb/#human/proteinDetails/57389/assay												Low confidence	Low confidence
LUC7L2	ProteomicsDB - LUC7L2	https://www.proteomicsdb.org/proteomicsdb/#human/proteinDetails/85982/assay												Low confidence			Low confidence
LYN	ProteomicsDB - LYN	https://www.proteomicsdb.org/proteomicsdb/#human/proteinDetails/52045/assay	x		x									High confidence	High confidence	8	High confidence	High confidence
MAP2K1	ProteomicsDB - MAP2K1	https://www.proteomicsdb.org/proteomicsdb/#human/proteinDetails/58119/assay	x		x									High confidence	High confidence	12	High confidence	Low confidence
MAP2K2	ProteomicsDB - MAP2K2	https://www.proteomicsdb.org/proteomicsdb/#human/proteinDetails/55203/assay	x		x									High confidence	High confidence	6	High confidence	Low confidence
MAP2K3	ProteomicsDB - MAP2K3	https://www.proteomicsdb.org/proteomicsdb/#human/proteinDetails/55750/assay	x		x									High confidence	High confidence	120
MAP2K4	ProteomicsDB - MAP2K4	https://www.proteomicsdb.org/proteomicsdb/#human/proteinDetails/55703/assay	x		x									Low confidence	Low confidence
MAP2K5	ProteomicsDB - MAP2K5	https://www.proteomicsdb.org/proteomicsdb/#human/proteinDetails/59199/assay	x		x									High confidence	High confidence	41	High confidence	High confidence
MAP2K6	ProteomicsDB - MAP2K6	https://www.proteomicsdb.org/proteomicsdb/#human/proteinDetails/56487/assay	x		x									High confidence	High confidence	87
MAP3K1	ProteomicsDB - MAP3K1	https://www.proteomicsdb.org/proteomicsdb/#human/proteinDetails/59240/assay	x		x									High confidence	High confidence	97	High confidence	High confidence
MAP3K11	ProteomicsDB - MAP3K11	https://www.proteomicsdb.org/proteomicsdb/#human/proteinDetails/60929/assay	x		x									High confidence	High confidence	29
MAP3K2	ProteomicsDB - MAP3K2	https://www.proteomicsdb.org/proteomicsdb/#human/proteinDetails/85903/assay	x		x									High confidence	High confidence	164	High confidence
MAP3K3	ProteomicsDB - MAP3K3	https://www.proteomicsdb.org/proteomicsdb/#human/proteinDetails/78464/assay	x		x									High confidence	High confidence	246	High confidence
MAP3K4	ProteomicsDB - MAP3K4	https://www.proteomicsdb.org/proteomicsdb/#human/proteinDetails/86777/assay	x		x									High confidence	High confidence	52	High confidence
MAP3K5	ProteomicsDB - MAP3K5	https://www.proteomicsdb.org/proteomicsdb/#human/proteinDetails/78395/assay	x		x									High confidence	High confidence	182
MAP3K6	ProteomicsDB - MAP3K6	https://www.proteomicsdb.org/proteomicsdb/#human/proteinDetails/50834/assay	x		x									High confidence	High confidence	335
MAP4	ProteomicsDB - MAP4	https://www.proteomicsdb.org/proteomicsdb/#human/proteinDetails/54418/assay												High confidence				High confidence
MAP4K1	ProteomicsDB - MAP4K1	https://www.proteomicsdb.org/proteomicsdb/#human/proteinDetails/75603/assay	x		x									High confidence	High confidence	15		High confidence
MAP4K2	ProteomicsDB - MAP4K2	https://www.proteomicsdb.org/proteomicsdb/#human/proteinDetails/58984/assay	x		x									High confidence	High confidence	41	High confidence	High confidence
MAP4K3	ProteomicsDB - MAP4K3	https://www.proteomicsdb.org/proteomicsdb/#human/proteinDetails/70709/assay	x		x									High confidence	High confidence	33	High confidence	High confidence
MAP4K4	ProteomicsDB - MAP4K4	https://www.proteomicsdb.org/proteomicsdb/#human/proteinDetails/51066/assay	x		x									High confidence	High confidence	19
MAP4K5	ProteomicsDB - MAP4K5	https://www.proteomicsdb.org/proteomicsdb/#human/proteinDetails/86226/assay	x		x									High confidence	High confidence	6	High confidence	High confidence
MAPK1	ProteomicsDB - MAPK1	https://www.proteomicsdb.org/proteomicsdb/#human/proteinDetails/54488/assay	x		x									High confidence	High confidence	22
MAPK10	ProteomicsDB - MAPK10	https://www.proteomicsdb.org/proteomicsdb/#human/proteinDetails/56616/assay	x		x									High confidence	High confidence	1	High confidence
MAPK11	ProteomicsDB - MAPK11	https://www.proteomicsdb.org/proteomicsdb/#human/proteinDetails/60745/assay	x		x									High confidence	High confidence	5	High confidence
MAPK14	ProteomicsDB - MAPK14	https://www.proteomicsdb.org/proteomicsdb/#human/proteinDetails/60901/assay	x		x									High confidence	High confidence	5	High confidence
MAPK15	ProteomicsDB - MAPK15	https://www.proteomicsdb.org/proteomicsdb/#human/proteinDetails/74209/assay	x		x									High confidence	High confidence	90
MAPK3	ProteomicsDB - MAPK3	https://www.proteomicsdb.org/proteomicsdb/#human/proteinDetails/54383/assay	x		x									High confidence	High confidence	19
MAPK7	ProteomicsDB - MAPK7	https://www.proteomicsdb.org/proteomicsdb/#human/proteinDetails/59203/assay	x		x									High confidence	High confidence	253
MAPK8	ProteomicsDB - MAPK8	https://www.proteomicsdb.org/proteomicsdb/#human/proteinDetails/55694/assay	x		x									High confidence	High confidence	17
MAPK9	ProteomicsDB - MAPK9	https://www.proteomicsdb.org/proteomicsdb/#human/proteinDetails/55698/assay	x		x									High confidence	High confidence	2	Low confidence
MAPKAPK2	ProteomicsDB - MAPKAPK2	https://www.proteomicsdb.org/proteomicsdb/#human/proteinDetails/55964/assay	x		x									High confidence	High confidence	0.3
MAPKAPK3	ProteomicsDB - MAPKAPK3	https://www.proteomicsdb.org/proteomicsdb/#human/proteinDetails/60998/assay	x		x									High confidence	High confidence	23
MAPKAPK5	ProteomicsDB - MAPKAPK5	https://www.proteomicsdb.org/proteomicsdb/#human/proteinDetails/70805/assay	x		x									High confidence	High confidence	272
MARK2	ProteomicsDB - MARK2	https://www.proteomicsdb.org/proteomicsdb/#human/proteinDetails/68707/assay	x		x									High confidence	High confidence	13	High confidence
MARK3	ProteomicsDB - MARK3	https://www.proteomicsdb.org/proteomicsdb/#human/proteinDetails/54386/assay	x		x									High confidence	High confidence	16	High confidence
MARK4	ProteomicsDB - MARK4	https://www.proteomicsdb.org/proteomicsdb/#human/proteinDetails/77145/assay	x		x									High confidence	High confidence	8
MAT2A	ProteomicsDB - MAT2A	https://www.proteomicsdb.org/proteomicsdb/#human/proteinDetails/54763/assay			x							x	NTRK1|GRK5	High confidence	High confidence	1285
MCM4	ProteomicsDB - MCM4	https://www.proteomicsdb.org/proteomicsdb/#human/proteinDetails/54934/assay			x		x							Low confidence	Low confidence
MDH1	ProteomicsDB - MDH1	https://www.proteomicsdb.org/proteomicsdb/#human/proteinDetails/55384/assay										x	NTRK1|PDXK|AKT1|EGFR	Low confidence	Low confidence
MDN1	ProteomicsDB - MDN1	https://www.proteomicsdb.org/proteomicsdb/#human/proteinDetails/82649/assay			x				x			x	GSK3A|STK17B|LRRK2	Low confidence	Low confidence
MED23	ProteomicsDB - MED23	https://www.proteomicsdb.org/proteomicsdb/#human/proteinDetails/85057/assay										x	CDK8|CDK19|DYRK1B|PHKB|PHKG2|AGK|RIOK1|DYRK1A|ROCK1|NTRK1	Low confidence	Low confidence
MELK	ProteomicsDB - MELK	https://www.proteomicsdb.org/proteomicsdb/#human/proteinDetails/60115/assay	x		x									High confidence	High confidence	29		High confidence
MERTK	ProteomicsDB - MERTK	https://www.proteomicsdb.org/proteomicsdb/#human/proteinDetails/58992/assay	x		x									High confidence	Low confidence		High confidence	High confidence
MET	ProteomicsDB - MET	https://www.proteomicsdb.org/proteomicsdb/#human/proteinDetails/52128/assay	x		x									High confidence	High confidence	0.3		High confidence
MFAP1	ProteomicsDB - MFAP1	https://www.proteomicsdb.org/proteomicsdb/#human/proteinDetails/56782/assay										x	NTRK1|CDK2|CSNK2A1	Low confidence	Low confidence
MINK1	ProteomicsDB - MINK1	https://www.proteomicsdb.org/proteomicsdb/#human/proteinDetails/71917/assay	x		x									High confidence	High confidence	41
MLLT1	ProteomicsDB - MLLT1	https://www.proteomicsdb.org/proteomicsdb/#human/proteinDetails/58185/assay										x	CDK9|PIP4K2A|CAMKV|CSNK2A1	Low confidence	Low confidence
MLST8	ProteomicsDB - MLST8	https://www.proteomicsdb.org/proteomicsdb/#human/proteinDetails/79194/assay												High confidence					High confidence
MNAT1	ProteomicsDB - MNAT1	https://www.proteomicsdb.org/proteomicsdb/#human/proteinDetails/56452/assay										x	CDK7|CDK2|ICK	High confidence	High confidence	3
MOB1A;MOB1B	ProteomicsDB - MOB1A	https://www.proteomicsdb.org/proteomicsdb/#human/proteinDetails/81237/assay										x	LATS1|LATS2|STK38L|STK38|STK3|STK4	High confidence	High confidence	31
MST1R	ProteomicsDB - MST1R	https://www.proteomicsdb.org/proteomicsdb/#human/proteinDetails/58294/assay	x		x									High confidence	High confidence	25		High confidence
MTOR	ProteomicsDB - MTOR	https://www.proteomicsdb.org/proteomicsdb/#human/proteinDetails/55511/assay	x											High confidence					High confidence
MYH10	ProteomicsDB - MYH10	https://www.proteomicsdb.org/proteomicsdb/#human/proteinDetails/55095/assay			x				x			x	BMP2K|DAPK3|PIK3C2A|LYN	High confidence	High confidence	229
MYH14	ProteomicsDB - MYH14	https://www.proteomicsdb.org/proteomicsdb/#human/proteinDetails/69113/assay			x									Low confidence	Low confidence
MYLK	ProteomicsDB - MYLK	https://www.proteomicsdb.org/proteomicsdb/#human/proteinDetails/60733/assay	x		x									High confidence	High confidence	72
MYLK3	ProteomicsDB - MYLK3	https://www.proteomicsdb.org/proteomicsdb/#human/proteinDetails/61603/assay	x		x									High confidence	High confidence	15
NASP	ProteomicsDB - NASP	https://www.proteomicsdb.org/proteomicsdb/#human/proteinDetails/55984/assay												High confidence			High confidence
NAT10	ProteomicsDB - NAT10	https://www.proteomicsdb.org/proteomicsdb/#human/proteinDetails/80229/assay			x									Low confidence	Low confidence
NCKAP1L	ProteomicsDB - NCKAP1L	https://www.proteomicsdb.org/proteomicsdb/#human/proteinDetails/56795/assay												Low confidence	Low confidence
NCL	ProteomicsDB - NCL	https://www.proteomicsdb.org/proteomicsdb/#human/proteinDetails/53647/assay			x									Low confidence	Low confidence
NDUFA13	ProteomicsDB - NDUFA13	https://www.proteomicsdb.org/proteomicsdb/#human/proteinDetails/83552/assay			x									Low confidence	Low confidence
NDUFB5	ProteomicsDB - NDUFB5	https://www.proteomicsdb.org/proteomicsdb/#human/proteinDetails/49102/assay												High confidence			High confidence
NEK1	ProteomicsDB - NEK1	https://www.proteomicsdb.org/proteomicsdb/#human/proteinDetails/77788/assay	x		x									High confidence	High confidence	365	High confidence
NEK2	ProteomicsDB - NEK2	https://www.proteomicsdb.org/proteomicsdb/#human/proteinDetails/56453/assay	x		x									Low confidence	Low confidence
NEK3	ProteomicsDB - NEK3	https://www.proteomicsdb.org/proteomicsdb/#human/proteinDetails/56457/assay	x		x									High confidence	High confidence	286
NEK7	ProteomicsDB - NEK7	https://www.proteomicsdb.org/proteomicsdb/#human/proteinDetails/74364/assay	x		x									High confidence	High confidence	2126
NEK9	ProteomicsDB - NEK9	https://www.proteomicsdb.org/proteomicsdb/#human/proteinDetails/74219/assay	x		x									High confidence	High confidence	41
NLK	ProteomicsDB - NLK	https://www.proteomicsdb.org/proteomicsdb/#human/proteinDetails/83953/assay	x		x									High confidence	High confidence	3
NME2	ProteomicsDB - NME2	https://www.proteomicsdb.org/proteomicsdb/#human/proteinDetails/53986/assay			x	x								High confidence	High confidence	142
NME2;NME2P1	ProteomicsDB - NME2	https://www.proteomicsdb.org/proteomicsdb/#human/proteinDetails/53986/assay			x									Low confidence			Low confidence
NME2P1	ProteomicsDB - NME2P1	https://www.proteomicsdb.org/proteomicsdb/#human/proteinDetails/49381/assay			x	x								Low confidence	Low confidence
NNT	ProteomicsDB - NNT	https://www.proteomicsdb.org/proteomicsdb/#human/proteinDetails/59408/assay												Low confidence			Low confidence
NPM1	ProteomicsDB - NPM1	https://www.proteomicsdb.org/proteomicsdb/#human/proteinDetails/51927/assay										x	CDKN2A|PRKCA|AURKA|RPS6KB2|NTRK1	High confidence	High confidence	482
NQO2	ProteomicsDB - NQO2	https://www.proteomicsdb.org/proteomicsdb/#human/proteinDetails/53285/assay								x		x	RPS6KA2	High confidence	High confidence	4	High confidence	High confidence
NRK	ProteomicsDB - NRK	https://www.proteomicsdb.org/proteomicsdb/#human/proteinDetails/68985/assay	x		x									High confidence			High confidence
NTRK1	ProteomicsDB - NTRK1	https://www.proteomicsdb.org/proteomicsdb/#human/proteinDetails/51723/assay	x		x									High confidence	High confidence	2		High confidence
NUAK2	ProteomicsDB - NUAK2	https://www.proteomicsdb.org/proteomicsdb/#human/proteinDetails/80220/assay	x		x									High confidence	High confidence	24
NUCKS1	ProteomicsDB - NUCKS1	https://www.proteomicsdb.org/proteomicsdb/#human/proteinDetails/80404/assay												Low confidence	Low confidence
OLA1	ProteomicsDB - OLA1	https://www.proteomicsdb.org/proteomicsdb/#human/proteinDetails/82622/assay			x			x	x			x	NTRK1|GRK5	Low confidence	Low confidence
OPA1	ProteomicsDB - OPA1	https://www.proteomicsdb.org/proteomicsdb/#human/proteinDetails/49340/assay			x			x				x	EPHA1|NTRK1|EGFR	Low confidence	Low confidence
OSBPL3	ProteomicsDB - OSBPL3	https://www.proteomicsdb.org/proteomicsdb/#human/proteinDetails/80852/assay										x	AURKA	High confidence	High confidence	1918
OSBPL8	ProteomicsDB - OSBPL8	https://www.proteomicsdb.org/proteomicsdb/#human/proteinDetails/79828/assay										x	NTRK1	Low confidence	Low confidence
OSGEP	ProteomicsDB - OSGEP	https://www.proteomicsdb.org/proteomicsdb/#human/proteinDetails/81984/assay										x	TP53RK|RYK|EEF2K	High confidence	High confidence	48
OXA1L	ProteomicsDB - OXA1L	https://www.proteomicsdb.org/proteomicsdb/#human/proteinDetails/60423/assay												High confidence			High confidence
P4HB	ProteomicsDB - P4HB	https://www.proteomicsdb.org/proteomicsdb/#human/proteinDetails/51976/assay												Low confidence	Low confidence
PAG1	ProteomicsDB - PAG1	https://www.proteomicsdb.org/proteomicsdb/#human/proteinDetails/82961/assay										x	CSK|ABL1|FYN|NTRK3|ZAP7|LCK|LYN|SYK	High confidence	High confidence	4
PAICS	ProteomicsDB - PAICS	https://www.proteomicsdb.org/proteomicsdb/#human/proteinDetails/53968/assay			x							x	NTRK1|CDK2	Low confidence	Low confidence
PAK2	ProteomicsDB - PAK2	https://www.proteomicsdb.org/proteomicsdb/#human/proteinDetails/59208/assay	x		x									High confidence	High confidence	4
PAK4	ProteomicsDB - PAK4	https://www.proteomicsdb.org/proteomicsdb/#human/proteinDetails/51192/assay	x		x									High confidence	High confidence	25
PAK6	ProteomicsDB - PAK6	https://www.proteomicsdb.org/proteomicsdb/#human/proteinDetails/82189/assay	x		x									High confidence	High confidence	3
PASK	ProteomicsDB - PASK	https://www.proteomicsdb.org/proteomicsdb/#human/proteinDetails/77959/assay	x		x									Low confidence	Low confidence
PCBP2;PCBP3	ProteomicsDB - PCBP2	https://www.proteomicsdb.org/proteomicsdb/#human/proteinDetails/60542/assay										x	CASK|NTRK1|CDK2|CDK9	Low confidence	Low confidence
PCYT1A	ProteomicsDB - PCYT1A	https://www.proteomicsdb.org/proteomicsdb/#human/proteinDetails/56021/assay			x									Low confidence	Low confidence
PDCD10	ProteomicsDB - PDCD10	https://www.proteomicsdb.org/proteomicsdb/#human/proteinDetails/79108/assay										x	STK24|STK25|STK26	High confidence	High confidence	61
PDCD11	ProteomicsDB - PDCD11	https://www.proteomicsdb.org/proteomicsdb/#human/proteinDetails/60128/assay										x	NTRK1	High confidence	High confidence	63
PDGFRB	ProteomicsDB - PDGFRB	https://www.proteomicsdb.org/proteomicsdb/#human/proteinDetails/52253/assay	x		x									High confidence	High confidence	4		Low confidence
PDPK1;PDPK2P	ProteomicsDB - PDPK1	https://www.proteomicsdb.org/proteomicsdb/#human/proteinDetails/48736/assay	x		x									High confidence	High confidence	6
PDXK	ProteomicsDB - PDXK	https://www.proteomicsdb.org/proteomicsdb/#human/proteinDetails/48024/assay			x	x								High confidence	High confidence	286
PEBP1	ProteomicsDB - PEBP1	https://www.proteomicsdb.org/proteomicsdb/#human/proteinDetails/54634/assay			x							x	RAF1|AKT1|MAP2K1|MAPK1|ADRBK1	Low confidence	Low confidence
PFKP	ProteomicsDB - PFKP	https://www.proteomicsdb.org/proteomicsdb/#human/proteinDetails/57992/assay			x	x								High confidence	High confidence	983
PGD	ProteomicsDB - PGD	https://www.proteomicsdb.org/proteomicsdb/#human/proteinDetails/56472/assay										x	RPS6KA1|CDK4|CDK2	Low confidence	Low confidence
PGRMC1	ProteomicsDB - PGRMC1	https://www.proteomicsdb.org/proteomicsdb/#human/proteinDetails/47815/assay									x			Low confidence	Low confidence
PHKA1	ProteomicsDB - PHKA1	https://www.proteomicsdb.org/proteomicsdb/#human/proteinDetails/55708/assay										x	PHKG2	Low confidence	Low confidence
PHKA2	ProteomicsDB - PHKA2	https://www.proteomicsdb.org/proteomicsdb/#human/proteinDetails/55707/assay										x	RAF1|PHKG2	High confidence	High confidence	49	High confidence
PHKB	ProteomicsDB - PHKB	https://www.proteomicsdb.org/proteomicsdb/#human/proteinDetails/75726/assay												High confidence	Low confidence		High confidence
PHKG2	ProteomicsDB - PHKG2	https://www.proteomicsdb.org/proteomicsdb/#human/proteinDetails/53208/assay	x		x									High confidence	High confidence	53
PI4KA	ProteomicsDB - PI4KA	https://www.proteomicsdb.org/proteomicsdb/#human/proteinDetails/55512/assay	x		x									High confidence					High confidence
PI4KB	ProteomicsDB - PI4KB	https://www.proteomicsdb.org/proteomicsdb/#human/proteinDetails/83959/assay	x		x									High confidence					High confidence
PIGK	ProteomicsDB - PIGK	https://www.proteomicsdb.org/proteomicsdb/#human/proteinDetails/75395/assay												Low confidence	Low confidence
PIGT	ProteomicsDB - PIGT	https://www.proteomicsdb.org/proteomicsdb/#human/proteinDetails/75800/assay										x	NTRK1	Low confidence	Low confidence
PIK3C2A	ProteomicsDB - PIK3C2A	https://www.proteomicsdb.org/proteomicsdb/#human/proteinDetails/47892/assay	x		x									High confidence					High confidence
PIK3C2B	ProteomicsDB - PIK3C2B	https://www.proteomicsdb.org/proteomicsdb/#human/proteinDetails/48017/assay	x		x									High confidence			High confidence		High confidence
PIK3C3	ProteomicsDB - PIK3C3	https://www.proteomicsdb.org/proteomicsdb/#human/proteinDetails/73147/assay	x		x									High confidence					High confidence
PIK3CA	ProteomicsDB - PIK3CA	https://www.proteomicsdb.org/proteomicsdb/#human/proteinDetails/55509/assay	x		x									High confidence					High confidence
PIK3CG	ProteomicsDB - PIK3CG	https://www.proteomicsdb.org/proteomicsdb/#human/proteinDetails/55933/assay	x		x									High confidence					High confidence
PIK3R1	ProteomicsDB - PIK3R1	https://www.proteomicsdb.org/proteomicsdb/#human/proteinDetails/54429/assay												High confidence	Low confidence		Low confidence		High confidence
PIK3R2	ProteomicsDB - PIK3R2	https://www.proteomicsdb.org/proteomicsdb/#human/proteinDetails/47910/assay												High confidence					High confidence
PIK3R4	ProteomicsDB - PIK3R4	https://www.proteomicsdb.org/proteomicsdb/#human/proteinDetails/78330/assay												High confidence					High confidence
PIM1	ProteomicsDB - PIM1	https://www.proteomicsdb.org/proteomicsdb/#human/proteinDetails/52741/assay	x		x									High confidence	High confidence	1	High confidence
PIM2	ProteomicsDB - PIM2	https://www.proteomicsdb.org/proteomicsdb/#human/proteinDetails/83676/assay	x		x									High confidence	High confidence	42
PIP4K2A	ProteomicsDB - PIP4K2A	https://www.proteomicsdb.org/proteomicsdb/#human/proteinDetails/55887/assay	x		x									High confidence	High confidence	208
PIP4K2A;PIP4K2B	ProteomicsDB - PIP4K2A	https://www.proteomicsdb.org/proteomicsdb/#human/proteinDetails/55887/assay	x		x									High confidence	High confidence	126
PIP4K2B	ProteomicsDB - PIP4K2B	https://www.proteomicsdb.org/proteomicsdb/#human/proteinDetails/57586/assay	x		x									High confidence			High confidence
PIP4K2C	ProteomicsDB - PIP4K2C	https://www.proteomicsdb.org/proteomicsdb/#human/proteinDetails/74044/assay	x		x									High confidence	High confidence	67	High confidence	Low confidence
PKMYT1	ProteomicsDB - PKMYT1	https://www.proteomicsdb.org/proteomicsdb/#human/proteinDetails/78372/assay	x		x									High confidence	High confidence	876	High confidence
PKN1	ProteomicsDB - PKN1	https://www.proteomicsdb.org/proteomicsdb/#human/proteinDetails/60877/assay	x		x									High confidence	High confidence	8	High confidence
PKN2	ProteomicsDB - PKN2	https://www.proteomicsdb.org/proteomicsdb/#human/proteinDetails/60880/assay	x		x									High confidence	High confidence	8	High confidence
PKN3	ProteomicsDB - PKN3	https://www.proteomicsdb.org/proteomicsdb/#human/proteinDetails/67014/assay	x		x									Low confidence	Low confidence
PLA2G2A	ProteomicsDB - PLA2G2A	https://www.proteomicsdb.org/proteomicsdb/#human/proteinDetails/53059/assay												High confidence	High confidence	3139
PLK1	ProteomicsDB - PLK1	https://www.proteomicsdb.org/proteomicsdb/#human/proteinDetails/56569/assay	x		x									High confidence	High confidence	672
PLK4	ProteomicsDB - PLK4	https://www.proteomicsdb.org/proteomicsdb/#human/proteinDetails/47893/assay	x		x									High confidence	High confidence	3	Low confidence	High confidence
PPIB	ProteomicsDB - PPIB	https://www.proteomicsdb.org/proteomicsdb/#human/proteinDetails/54078/assay												Low confidence	Low confidence
PPP1CA	ProteomicsDB - PPP1CA	https://www.proteomicsdb.org/proteomicsdb/#human/proteinDetails/57365/assay										x	LMTK2|AURKA|EIF2AK2|AKAP11|CDK4|IKBKB|GSK3B|MST1R|AATK|CSNK2B|PRKAR1A|PKM|STK24|CHUK|MAP4k4 and many more (35)	Low confidence	Low confidence
PPP4R2	ProteomicsDB - PPP4R2	https://www.proteomicsdb.org/proteomicsdb/#human/proteinDetails/83154/assay												Low confidence	Low confidence
PRKAA1	ProteomicsDB - PRKAA1	https://www.proteomicsdb.org/proteomicsdb/#human/proteinDetails/59180/assay	x		x									High confidence	High confidence	6
PRKAB1	ProteomicsDB - PRKAB1	https://www.proteomicsdb.org/proteomicsdb/#human/proteinDetails/86122/assay										x	PRKAA1|PRKAA2|ULK1|MAP3K7|MAPK6|MAST3|NEK4	High confidence	High confidence	9
PRKAB2	ProteomicsDB - PRKAB2	https://www.proteomicsdb.org/proteomicsdb/#human/proteinDetails/49144/assay										x	PRKAA1|PRKAA2|PHKG2|ULK1|MAP3K15|MAP3K6|MAP3K5|MAST3|PRKDC	High confidence	High confidence	2
PRKACA	ProteomicsDB - PRKACA	https://www.proteomicsdb.org/proteomicsdb/#human/proteinDetails/53496/assay	x	x	?									High confidence	High confidence	10	High confidence
PRKACB	ProteomicsDB - PRKACB	https://www.proteomicsdb.org/proteomicsdb/#human/proteinDetails/54019/assay	x		x									High confidence	High confidence	14	High confidence
PRKACG	ProteomicsDB - PRKACG	https://www.proteomicsdb.org/proteomicsdb/#human/proteinDetails/54009/assay	x		x									High confidence	High confidence	3	Low confidence
PRKAG1	ProteomicsDB - PRKAG1	https://www.proteomicsdb.org/proteomicsdb/#human/proteinDetails/56688/assay			x									High confidence	High confidence	6
PRKAG2	ProteomicsDB - PRKAG2	https://www.proteomicsdb.org/proteomicsdb/#human/proteinDetails/84222/assay			x									High confidence	High confidence	5
PRKAR2A	ProteomicsDB - PRKAR2A	https://www.proteomicsdb.org/proteomicsdb/#human/proteinDetails/52996/assay			x							x	PRKACB|PRKACA|GSK3B|CSNK1E	High confidence	High confidence	3455
PRKCA	ProteomicsDB - PRKCA	https://www.proteomicsdb.org/proteomicsdb/#human/proteinDetails/53464/assay	x		x									High confidence	High confidence	13
PRKCB	ProteomicsDB - PRKCB	https://www.proteomicsdb.org/proteomicsdb/#human/proteinDetails/51855/assay	x		x									High confidence	High confidence	19	High confidence
PRKCD	ProteomicsDB - PRKCD	https://www.proteomicsdb.org/proteomicsdb/#human/proteinDetails/58342/assay	x		x									High confidence	High confidence	5	High confidence
PRKCE;PRKCH	ProteomicsDB - PRKCE	https://www.proteomicsdb.org/proteomicsdb/#human/proteinDetails/58054/assay	x		x									High confidence	High confidence	16
PRKCI	ProteomicsDB - PRKCI	https://www.proteomicsdb.org/proteomicsdb/#human/proteinDetails/55477/assay	x		x									High confidence	High confidence	1230	High confidence
PRKCQ	ProteomicsDB - PRKCQ	https://www.proteomicsdb.org/proteomicsdb/#human/proteinDetails/58279/assay	x		x									High confidence	High confidence	10
PRKCSH	ProteomicsDB - PRKCSH	https://www.proteomicsdb.org/proteomicsdb/#human/proteinDetails/53041/assay												High confidence				High confidence
PRKCZ	ProteomicsDB - PRKCZ	https://www.proteomicsdb.org/proteomicsdb/#human/proteinDetails/58330/assay	x		x									High confidence	Low confidence		High confidence
PRKD1	ProteomicsDB - PRKD1	https://www.proteomicsdb.org/proteomicsdb/#human/proteinDetails/60458/assay	x		x									High confidence			High confidence
PRKD2	ProteomicsDB - PRKD2	https://www.proteomicsdb.org/proteomicsdb/#human/proteinDetails/79872/assay	x		x									High confidence	High confidence	3	High confidence	Low confidence
PRKD3	ProteomicsDB - PRKD3	https://www.proteomicsdb.org/proteomicsdb/#human/proteinDetails/50446/assay	x		x									High confidence	High confidence	38	High confidence
PRKG1	ProteomicsDB - PRKG1	https://www.proteomicsdb.org/proteomicsdb/#human/proteinDetails/59781/assay	x		x									High confidence	High confidence	88
PRKX	ProteomicsDB - PRKX	https://www.proteomicsdb.org/proteomicsdb/#human/proteinDetails/56426/assay	x		x									High confidence	High confidence	1282	High confidence
PRKX;PRKY	ProteomicsDB - PRKX	https://www.proteomicsdb.org/proteomicsdb/#human/proteinDetails/56426/assay	x		x									High confidence	High confidence	8
PRPH	ProteomicsDB - PRPH	https://www.proteomicsdb.org/proteomicsdb/#human/proteinDetails/55423/assay												Low confidence	Low confidence
PSMA7	ProteomicsDB - PSMA7	https://www.proteomicsdb.org/proteomicsdb/#human/proteinDetails/48256/assay												Low confidence	Low confidence
PSMB6	ProteomicsDB - PSMB6	https://www.proteomicsdb.org/proteomicsdb/#human/proteinDetails/54447/assay												Low confidence	Low confidence
PSMC4	ProteomicsDB - PSMC4	https://www.proteomicsdb.org/proteomicsdb/#human/proteinDetails/55650/assay			x				x			x	NTRK1|MAP3K5	Low confidence	Low confidence
PSMD12	ProteomicsDB - PSMD12	https://www.proteomicsdb.org/proteomicsdb/#human/proteinDetails/47797/assay												Low confidence	Low confidence
PSMD6	ProteomicsDB - PSMD6	https://www.proteomicsdb.org/proteomicsdb/#human/proteinDetails/60360/assay							x					Low confidence	Low confidence
PSMD7	ProteomicsDB - PSMD7	https://www.proteomicsdb.org/proteomicsdb/#human/proteinDetails/56361/assay										x	NTRK1	Low confidence	Low confidence
PSMG1	ProteomicsDB - PSMG1	https://www.proteomicsdb.org/proteomicsdb/#human/proteinDetails/50890/assay												High confidence	High confidence	789
PTCD3	ProteomicsDB - PTCD3	https://www.proteomicsdb.org/proteomicsdb/#human/proteinDetails/76472/assay										x	NTRK1|ERBB3	Low confidence	Low confidence
PTK2	ProteomicsDB - PTK2	https://www.proteomicsdb.org/proteomicsdb/#human/proteinDetails/58320/assay	x		x									High confidence	High confidence	0.5	High confidence
PTK2B	ProteomicsDB - PTK2B	https://www.proteomicsdb.org/proteomicsdb/#human/proteinDetails/59955/assay	x		x									High confidence	High confidence	30		High confidence
PTK6	ProteomicsDB - PTK6	https://www.proteomicsdb.org/proteomicsdb/#human/proteinDetails/59709/assay	x		x									High confidence	High confidence	31	High confidence	High confidence
PTMA	ProteomicsDB - PTMA	https://www.proteomicsdb.org/proteomicsdb/#human/proteinDetails/51903/assay										x	STK26|CDK17|CDK2|CDK4|CDK1	Low confidence	Low confidence
PTPN1	ProteomicsDB - PTPN1	https://www.proteomicsdb.org/proteomicsdb/#human/proteinDetails/53539/assay										x	EGFR|JAK2|IGF1R|INSR|NTRK1|TYK2|LTK|NTRK3|NTRK2|CSNK2A1|SRC|GSK3B	High confidence	High confidence	4750
PTPRC	ProteomicsDB - PTPRC	https://www.proteomicsdb.org/proteomicsdb/#human/proteinDetails/52125/assay												High confidence			High confidence
PYCR1	ProteomicsDB - PYCR1	https://www.proteomicsdb.org/proteomicsdb/#human/proteinDetails/54872/assay										x	NTRK1	Low confidence	Low confidence
PYCR2	ProteomicsDB - PYCR2	https://www.proteomicsdb.org/proteomicsdb/#human/proteinDetails/76158/assay												Low confidence	Low confidence
PYGB	ProteomicsDB - PYGB	https://www.proteomicsdb.org/proteomicsdb/#human/proteinDetails/52720/assay												High confidence	High confidence	3569
PYGL	ProteomicsDB - PYGL	https://www.proteomicsdb.org/proteomicsdb/#human/proteinDetails/51923/assay												High confidence	High confidence	2121
Q6ZSR9	ProteomicsDB - Q6ZSR9	https://www.proteomicsdb.org/proteomicsdb/#human/proteinDetails/68234/assay	x		x									High confidence	High confidence	0.7	High confidence
RAB10	ProteomicsDB - RAB10	https://www.proteomicsdb.org/proteomicsdb/#human/proteinDetails/57255/assay			x			x				x	MAP3K15|AURKA	Low confidence	Low confidence
RAB27A	ProteomicsDB - RAB27A	https://www.proteomicsdb.org/proteomicsdb/#human/proteinDetails/56289/assay			x			x						Low confidence	Low confidence
RAB6A	ProteomicsDB - RAB6A	https://www.proteomicsdb.org/proteomicsdb/#human/proteinDetails/53752/assay			x			x				x	TGFBR	Low confidence	Low confidence
RABGAP1	ProteomicsDB - RABGAP1	https://www.proteomicsdb.org/proteomicsdb/#human/proteinDetails/86054/assay												Low confidence			Low confidence
RABL3	ProteomicsDB - RABL3	https://www.proteomicsdb.org/proteomicsdb/#human/proteinDetails/62938/assay												Low confidence	Low confidence
RAC1	ProteomicsDB - RAC1	https://www.proteomicsdb.org/proteomicsdb/#human/proteinDetails/57467/assay			x							x	PAK1|PAK2|PAK3|MAP3K1|CDC42BPG|MAP3K11|MAP3K4|PAK4|PAK7|LRRK2|CDK2|PTK2|LATS1	Low confidence	Low confidence
RAN	ProteomicsDB - RAN	https://www.proteomicsdb.org/proteomicsdb/#human/proteinDetails/57429/assay			x			x				x	NEK9|TYK2|IKBKB|ILK|NTRK1|ABL1|PAK4|CDK2	Low confidence	Low confidence
RANGAP1	ProteomicsDB - RANGAP1	https://www.proteomicsdb.org/proteomicsdb/#human/proteinDetails/55712/assay										x	NTRK1|TP53K|NLK	Low confidence	Low confidence
RASSF2	ProteomicsDB - RASSF2	https://www.proteomicsdb.org/proteomicsdb/#human/proteinDetails/56262/assay										x	STK3|STK4	High confidence	High confidence	22
RASSF3	ProteomicsDB - RASSF3	https://www.proteomicsdb.org/proteomicsdb/#human/proteinDetails/70160/assay										x	STK3|STK4	High confidence	High confidence	14
RASSF5	ProteomicsDB - RASSF5	https://www.proteomicsdb.org/proteomicsdb/#human/proteinDetails/74944/assay										x	STK3|STK4|HIPK1	High confidence	High confidence	31
RET	ProteomicsDB - RET	https://www.proteomicsdb.org/proteomicsdb/#human/proteinDetails/52047/assay	x		x									High confidence	High confidence	1	High confidence	High confidence
RIPK2	ProteomicsDB - RIPK2	https://www.proteomicsdb.org/proteomicsdb/#human/proteinDetails/48908/assay	x		x									High confidence	High confidence	0.9	High confidence	High confidence
RIPK3	ProteomicsDB - RIPK3	https://www.proteomicsdb.org/proteomicsdb/#human/proteinDetails/86299/assay	x		x									High confidence	High confidence	3		High confidence
RNPEP	ProteomicsDB - RNPEP	https://www.proteomicsdb.org/proteomicsdb/#human/proteinDetails/80809/assay												Low confidence	Low confidence
ROCK1	ProteomicsDB - ROCK1	https://www.proteomicsdb.org/proteomicsdb/#human/proteinDetails/59461/assay	x		x									High confidence	High confidence	8
ROCK2	ProteomicsDB - ROCK2	https://www.proteomicsdb.org/proteomicsdb/#human/proteinDetails/49773/assay	x		x									High confidence	High confidence	9
RPL10	ProteomicsDB - RPL10	https://www.proteomicsdb.org/proteomicsdb/#human/proteinDetails/54403/assay												High confidence	High confidence	710
RPL13	ProteomicsDB - RPL13	https://www.proteomicsdb.org/proteomicsdb/#human/proteinDetails/54328/assay												Low confidence	Low confidence
RPL28	ProteomicsDB - RPL28	https://www.proteomicsdb.org/proteomicsdb/#human/proteinDetails/55761/assay												High confidence	Low confidence				High confidence
RPL31	ProteomicsDB - RPL31	https://www.proteomicsdb.org/proteomicsdb/#human/proteinDetails/57447/assay										x	CDK2	Low confidence	Low confidence
RPL35	ProteomicsDB - RPL35	https://www.proteomicsdb.org/proteomicsdb/#human/proteinDetails/55549/assay												Low confidence	Low confidence
RPL35A	ProteomicsDB - RPL35A	https://www.proteomicsdb.org/proteomicsdb/#human/proteinDetails/53545/assay												High confidence	High confidence	373
RPL4	ProteomicsDB - RPL4	https://www.proteomicsdb.org/proteomicsdb/#human/proteinDetails/55216/assay												High confidence	High confidence	43
RPL6	ProteomicsDB - RPL6	https://www.proteomicsdb.org/proteomicsdb/#human/proteinDetails/58132/assay												Low confidence	Low confidence
RPS4X	ProteomicsDB - RPS4X	https://www.proteomicsdb.org/proteomicsdb/#human/proteinDetails/57417/assay										x	AURKB|RPS6KB2|AURKA|NTRK1|CDK9|CDK2|CAMK2D	High confidence	High confidence	211
RPS6KA1	ProteomicsDB - RPS6KA1	https://www.proteomicsdb.org/proteomicsdb/#human/proteinDetails/60583/assay	x		x									High confidence	High confidence	251
RPS6KA3	ProteomicsDB - RPS6KA3	https://www.proteomicsdb.org/proteomicsdb/#human/proteinDetails/56408/assay	x		x									High confidence	High confidence	100
RPS6KA4	ProteomicsDB - RPS6KA4	https://www.proteomicsdb.org/proteomicsdb/#human/proteinDetails/50149/assay	x		x									High confidence	High confidence	73
RPS6KA5	ProteomicsDB - RPS6KA5	https://www.proteomicsdb.org/proteomicsdb/#human/proteinDetails/50098/assay	x		x									High confidence	High confidence	298
RPS6KA6	ProteomicsDB - RPS6KA6	https://www.proteomicsdb.org/proteomicsdb/#human/proteinDetails/84712/assay	x		x									High confidence	High confidence	4
RPS6KB1	ProteomicsDB - RPS6KB1	https://www.proteomicsdb.org/proteomicsdb/#human/proteinDetails/54095/assay	x		x									High confidence	High confidence	15
RPS9	ProteomicsDB - RPS9	https://www.proteomicsdb.org/proteomicsdb/#human/proteinDetails/55763/assay												High confidence					High confidence
RRP8	ProteomicsDB - RRP8	https://www.proteomicsdb.org/proteomicsdb/#human/proteinDetails/48780/assay										x	ILK	Low confidence	Low confidence
S100A6	ProteomicsDB - S100A6	https://www.proteomicsdb.org/proteomicsdb/#human/proteinDetails/51911/assay										x	CDK2	Low confidence	Low confidence
S100A8	ProteomicsDB - S100A8	https://www.proteomicsdb.org/proteomicsdb/#human/proteinDetails/51795/assay										x	CDK2|LLRK1|NUAK1|	High confidence	High confidence	2273	Low confidence
S100A9	ProteomicsDB - S100A9	https://www.proteomicsdb.org/proteomicsdb/#human/proteinDetails/51910/assay												Low confidence			Low confidence
SAE1	ProteomicsDB - SAE1	https://www.proteomicsdb.org/proteomicsdb/#human/proteinDetails/83952/assay			x									Low confidence	Low confidence
SARNP	ProteomicsDB - SARNP	https://www.proteomicsdb.org/proteomicsdb/#human/proteinDetails/57726/assay										x	LIMK1|CSNK2B|CDK2	Low confidence	Low confidence
SAV1	ProteomicsDB - SAV1	https://www.proteomicsdb.org/proteomicsdb/#human/proteinDetails/80818/assay										x	STK3|STK4|LATS2|CSNK1E|LATS1	High confidence	High confidence	25
SBK1	ProteomicsDB - SBK1	https://www.proteomicsdb.org/proteomicsdb/#human/proteinDetails/62433/assay	x		x									High confidence			High confidence
SDAD1	ProteomicsDB - SDAD1	https://www.proteomicsdb.org/proteomicsdb/#human/proteinDetails/82860/assay												High confidence			High confidence
SEC16A	ProteomicsDB - SEC16A	https://www.proteomicsdb.org/proteomicsdb/#human/proteinDetails/48383/assay												Low confidence	Low confidence
SEPT9	ProteomicsDB - SEPT9	https://www.proteomicsdb.org/proteomicsdb/#human/proteinDetails/84325/assay			x			x				x	STK11|NTRK1	Low confidence	Low confidence
SGTA	ProteomicsDB - SGTA	https://www.proteomicsdb.org/proteomicsdb/#human/proteinDetails/49156/assay										x	NME3|PHKA1|HK1	Low confidence	Low confidence
SIK2	ProteomicsDB - SIK2	https://www.proteomicsdb.org/proteomicsdb/#human/proteinDetails/80290/assay	x		x									High confidence	High confidence	2	High confidence
SIK3	ProteomicsDB - SIK3	https://www.proteomicsdb.org/proteomicsdb/#human/proteinDetails/85820/assay	x		x									High confidence	High confidence	2	High confidence
SKIV2L2	ProteomicsDB - SKIV2L2	https://www.proteomicsdb.org/proteomicsdb/#human/proteinDetails/55503/assay			x		x							Low confidence	Low confidence
SLC16A3	ProteomicsDB - SLC16A3	https://www.proteomicsdb.org/proteomicsdb/#human/proteinDetails/48655/assay												High confidence	High confidence	2592
SLC25A11	ProteomicsDB - SLC25A11	https://www.proteomicsdb.org/proteomicsdb/#human/proteinDetails/58148/assay										x	PRKCA|NTRK1|FYN|YES1|CAMKK2|AATK	Low confidence	Low confidence
SLC25A5	ProteomicsDB - SLC25A5	https://www.proteomicsdb.org/proteomicsdb/#human/proteinDetails/51804/assay			x							x	ERBB3|RPS6KB2|NTRK1	High confidence	High confidence	451
SLC25A6	ProteomicsDB - SLC25A6	https://www.proteomicsdb.org/proteomicsdb/#human/proteinDetails/52837/assay			x							x	ERBB3|CHEK2|NTRK1|FGFR3	Low confidence	Low confidence
SLC2A1	ProteomicsDB - SLC2A1	https://www.proteomicsdb.org/proteomicsdb/#human/proteinDetails/52703/assay										x	TYK2|IRAK1|ILK|JAK2|STK17B|PTK2B	Low confidence	Low confidence
SLC5A1	ProteomicsDB - SLC5A1	https://www.proteomicsdb.org/proteomicsdb/#human/proteinDetails/52997/assay												High confidence	High confidence	98
SLK	ProteomicsDB - SLK	https://www.proteomicsdb.org/proteomicsdb/#human/proteinDetails/80544/assay	x		x									High confidence	High confidence	58	High confidence	High confidence
SMARCC1	ProteomicsDB - SMARCC1	https://www.proteomicsdb.org/proteomicsdb/#human/proteinDetails/75605/assay										x	AURKB|NTRK1|Rock1|CDK8|STK11	High confidence	High confidence	2652
SMARCE1	ProteomicsDB - SMARCE1	https://www.proteomicsdb.org/proteomicsdb/#human/proteinDetails/75754/assay										x	TNIK|	Low confidence	Low confidence
SMC1A	ProteomicsDB - SMC1A	https://www.proteomicsdb.org/proteomicsdb/#human/proteinDetails/60117/assay			x							x	ATM|NTRK1|PLK1|EGFR|ATR|PRKAA2|CAMKK2|CDK4|CDK2|CDK8|CDK2	Low confidence	Low confidence
SMC2	ProteomicsDB - SMC2	https://www.proteomicsdb.org/proteomicsdb/#human/proteinDetails/50812/assay			x							x	EGFR|NTRK1|AURKA|EPHA1|CDK9	High confidence	High confidence	1106
SMEK1	ProteomicsDB - SMEK1	https://www.proteomicsdb.org/proteomicsdb/#human/proteinDetails/66444/assay												High confidence			High confidence
SMS	ProteomicsDB - SMS	https://www.proteomicsdb.org/proteomicsdb/#human/proteinDetails/56531/assay										x	TP53RK|NTRK1|MAPKAPK3|RPS6KA3|MAPK6	Low confidence	Low confidence
SNAP29	ProteomicsDB - SNAP29	https://www.proteomicsdb.org/proteomicsdb/#human/proteinDetails/51014/assay												Low confidence	Low confidence
SNRNP200	ProteomicsDB - SNRNP200	https://www.proteomicsdb.org/proteomicsdb/#human/proteinDetails/50136/assay			x		x					x	NTRK1|IRAK1|IRAK2	High confidence	High confidence	1382
SNRPF	ProteomicsDB - SNRPF	https://www.proteomicsdb.org/proteomicsdb/#human/proteinDetails/57387/assay										x	CDK2|EGFR	High confidence	High confidence	45
SOD2	ProteomicsDB - SOD2	https://www.proteomicsdb.org/proteomicsdb/#human/proteinDetails/51669/assay												Low confidence				Low confidence
SPAG9	ProteomicsDB - SPAG9	https://www.proteomicsdb.org/proteomicsdb/#human/proteinDetails/49302/assay										x	PLK1|MAP2K3|MAPK14|MAP2K4|MAP3K3|ABL1	Low confidence	Low confidence
SPG11	ProteomicsDB - SPG11	https://www.proteomicsdb.org/proteomicsdb/#human/proteinDetails/76968/assay												High confidence			High confidence
SRC	ProteomicsDB - SRC	https://www.proteomicsdb.org/proteomicsdb/#human/proteinDetails/52884/assay	x		x									High confidence	High confidence	1		Low confidence
SRP68	ProteomicsDB - SRP68	https://www.proteomicsdb.org/proteomicsdb/#human/proteinDetails/84303/assay												Low confidence			Low confidence
SRPR	ProteomicsDB - SRPR	https://www.proteomicsdb.org/proteomicsdb/#human/proteinDetails/52097/assay			x							x	MAP3K4|NTRK1	Low confidence	Low confidence
SRRT	ProteomicsDB - SRRT	https://www.proteomicsdb.org/proteomicsdb/#human/proteinDetails/79475/assay			x									Low confidence			Low confidence
SRSF2	ProteomicsDB - SRSF2	https://www.proteomicsdb.org/proteomicsdb/#human/proteinDetails/57922/assay			x									Low confidence	Low confidence
SSR1	ProteomicsDB - SSR1	https://www.proteomicsdb.org/proteomicsdb/#human/proteinDetails/55609/assay										x	NTRK1|ERBB3|RPS6KB2|ILK	Low confidence	Low confidence
STK10	ProteomicsDB - STK10	https://www.proteomicsdb.org/proteomicsdb/#human/proteinDetails/50444/assay	x		x									High confidence	High confidence	3	High confidence	High confidence
STK11	ProteomicsDB - STK11	https://www.proteomicsdb.org/proteomicsdb/#human/proteinDetails/60780/assay	x		x									High confidence	High confidence	434
STK16	ProteomicsDB - STK16	https://www.proteomicsdb.org/proteomicsdb/#human/proteinDetails/50174/assay	x		x									High confidence	High confidence	95
STK17A	ProteomicsDB - STK17A	https://www.proteomicsdb.org/proteomicsdb/#human/proteinDetails/84141/assay	x		x									High confidence			High confidence
STK24	ProteomicsDB - STK24	https://www.proteomicsdb.org/proteomicsdb/#human/proteinDetails/86657/assay	x		x									High confidence	High confidence	57	Low confidence
STK26	ProteomicsDB - STK26	https://www.proteomicsdb.org/proteomicsdb/#human/proteinDetails/83756/assay	x		x									High confidence	High confidence	13
STK3	ProteomicsDB - STK3	https://www.proteomicsdb.org/proteomicsdb/#human/proteinDetails/59211/assay	x		x									High confidence	High confidence	30
STK38	ProteomicsDB - STK38	https://www.proteomicsdb.org/proteomicsdb/#human/proteinDetails/60489/assay	x		x									Low confidence	Low confidence
STK38L	ProteomicsDB - STK38L	https://www.proteomicsdb.org/proteomicsdb/#human/proteinDetails/85780/assay	x		x									High confidence	High confidence	2137
STK4	ProteomicsDB - STK4	https://www.proteomicsdb.org/proteomicsdb/#human/proteinDetails/59119/assay	x		x									High confidence	High confidence	29
STRADA	ProteomicsDB - STRADA	https://www.proteomicsdb.org/proteomicsdb/#human/proteinDetails/68873/assay	x	x	?									Low confidence	Low confidence
SUCLA2	ProteomicsDB - SUCLA2	https://www.proteomicsdb.org/proteomicsdb/#human/proteinDetails/83885/assay			x							x	NTRK1|EGFR	Low confidence	Low confidence
SUMO2	ProteomicsDB - SUMO2	https://www.proteomicsdb.org/proteomicsdb/#human/proteinDetails/57342/assay										x	PRKDC|HIPK2	Low confidence	Low confidence
SYK	ProteomicsDB - SYK	https://www.proteomicsdb.org/proteomicsdb/#human/proteinDetails/55634/assay	x		x									High confidence	High confidence	116
SYNGR2	ProteomicsDB - SYNGR2	https://www.proteomicsdb.org/proteomicsdb/#human/proteinDetails/49153/assay												High confidence	High confidence	399
TAGLN2	ProteomicsDB - TAGLN2	https://www.proteomicsdb.org/proteomicsdb/#human/proteinDetails/55277/assay												Low confidence			Low confidence
TANK	ProteomicsDB - TANK	https://www.proteomicsdb.org/proteomicsdb/#human/proteinDetails/75537/assay										x	TBK1|IKBKE	High confidence	High confidence	78
TAOK1	ProteomicsDB - TAOK1	https://www.proteomicsdb.org/proteomicsdb/#human/proteinDetails/68829/assay	x		x									High confidence	High confidence	2
TAOK2	ProteomicsDB - TAOK2	https://www.proteomicsdb.org/proteomicsdb/#human/proteinDetails/84953/assay	x		x									High confidence	High confidence	737		High confidence
TAOK3	ProteomicsDB - TAOK3	https://www.proteomicsdb.org/proteomicsdb/#human/proteinDetails/80560/assay	x		x									High confidence	High confidence	21
TAP1	ProteomicsDB - TAP1	https://www.proteomicsdb.org/proteomicsdb/#human/proteinDetails/58214/assay			x				x					Low confidence			Low confidence
TBK1	ProteomicsDB - TBK1	https://www.proteomicsdb.org/proteomicsdb/#human/proteinDetails/84323/assay	x		x									High confidence	High confidence	78
TBKBP1	ProteomicsDB - TBKBP1	https://www.proteomicsdb.org/proteomicsdb/#human/proteinDetails/1810/assay										x	TBK1|IKBKE|LATS2	High confidence	High confidence	77
TEC	ProteomicsDB - TEC	https://www.proteomicsdb.org/proteomicsdb/#human/proteinDetails/55526/assay	x		x									High confidence	High confidence	25	High confidence
TESK1	ProteomicsDB - TESK1	https://www.proteomicsdb.org/proteomicsdb/#human/proteinDetails/60637/assay	x		x									High confidence	High confidence	65		Low confidence
TESK2	ProteomicsDB - TESK2	https://www.proteomicsdb.org/proteomicsdb/#human/proteinDetails/78067/assay	x		x									Low confidence	Low confidence
TEX264	ProteomicsDB - TEX264	https://www.proteomicsdb.org/proteomicsdb/#human/proteinDetails/86698/assay										x	CSNK1D|CSNK1E|CHEK2|CSNK1A1|MAP4K4|MINK1	High confidence	High confidence	806
TGFBR1	ProteomicsDB - TGFBR1	https://www.proteomicsdb.org/proteomicsdb/#human/proteinDetails/55234/assay	x		x									High confidence	High confidence	2	Low confidence
TGFBR2	ProteomicsDB - TGFBR2	https://www.proteomicsdb.org/proteomicsdb/#human/proteinDetails/55264/assay	x		x									High confidence	High confidence	80	High confidence
THRAP3	ProteomicsDB - THRAP3	https://www.proteomicsdb.org/proteomicsdb/#human/proteinDetails/85914/assay			x							x	CLK2|SRPK3|SRPK1|SRPK2|CSNK2A2|CLK3|CLK1|PLK2|CAMKV|NTRK1|CSNK2A1	Low confidence	Low confidence
TM9SF4	ProteomicsDB - TM9SF4	https://www.proteomicsdb.org/proteomicsdb/#human/proteinDetails/75305/assay												High confidence			High confidence
TMEM33	ProteomicsDB - TMEM33	https://www.proteomicsdb.org/proteomicsdb/#human/proteinDetails/56997/assay										x	NTRK1	Low confidence	Low confidence
TNIK	ProteomicsDB - TNIK	https://www.proteomicsdb.org/proteomicsdb/#human/proteinDetails/84769/assay	x		x									High confidence	High confidence	10
TNK1	ProteomicsDB - TNK1	https://www.proteomicsdb.org/proteomicsdb/#human/proteinDetails/59467/assay	x		x									High confidence	High confidence	3	High confidence	Low confidence
TNK2	ProteomicsDB - TNK2	https://www.proteomicsdb.org/proteomicsdb/#human/proteinDetails/58556/assay	x		x									High confidence	High confidence	5	High confidence
TOP2A	ProteomicsDB - TOP2A	https://www.proteomicsdb.org/proteomicsdb/#human/proteinDetails/52767/assay			x							x	CSNK2A1|MAPK1|CSNK2B|GSK3B|PRKCA|SRPK1|PRKCG|PRKCB|CSNK2A2	Low confidence	Low confidence
TOP2B	ProteomicsDB - TOP2B	https://www.proteomicsdb.org/proteomicsdb/#human/proteinDetails/58133/assay			x							x	NTRK1|CSNK2B	High confidence	High confidence	148
TP53RK	ProteomicsDB - TP53RK	https://www.proteomicsdb.org/proteomicsdb/#human/proteinDetails/78064/assay	x		x									High confidence	High confidence	58
TPRKB	ProteomicsDB - TPRKB	https://www.proteomicsdb.org/proteomicsdb/#human/proteinDetails/86011/assay										x	TP53RK|PRKACB	High confidence	High confidence	47
TRAF2	ProteomicsDB - TRAF2	https://www.proteomicsdb.org/proteomicsdb/#human/proteinDetails/59035/assay										x	RIPK1|MAP3K14|TANK|IKBK|MAP3K5|IKBKE|TBK1|CHUK|EGFR|MAP3K1|IKBKG|ERN1|PKN1|MAP3K7|RIPK2|MAP4K2|EIF2AK2|ERN2GSK3B|MAP3K8|MAPK9|MTOR|YES1|TAOK3|MAST|TNIK|RIPK3|MAP4K5|LRRK2	Low confidence	Low confidence
TRAF7	ProteomicsDB - TRAF7	https://www.proteomicsdb.org/proteomicsdb/#human/proteinDetails/67263/assay										x	RIPK4|MAP3K3|MAP3K2|MAP2K5	Low confidence	Low confidence
TRRAP	ProteomicsDB - TRRAP	https://www.proteomicsdb.org/proteomicsdb/#human/proteinDetails/86142/assay										x	CDK8	High confidence	High confidence	21
TTC7B	ProteomicsDB - TTC7B	https://www.proteomicsdb.org/proteomicsdb/#human/proteinDetails/69737/assay												High confidence					High confidence
TTK	ProteomicsDB - TTK	https://www.proteomicsdb.org/proteomicsdb/#human/proteinDetails/54932/assay	x		x									Low confidence	Low confidence
TUBB6	ProteomicsDB - TUBB6	https://www.proteomicsdb.org/proteomicsdb/#human/proteinDetails/79081/assay			x			x						High confidence			High confidence
TUFM	ProteomicsDB - TUFM	https://www.proteomicsdb.org/proteomicsdb/#human/proteinDetails/56003/assay			x			x				x	CAMK1D|ERBB3|NTRK1|TSSK1B|RPS6KB2|GRK5|CDK2	Low confidence	Low confidence
TXN	ProteomicsDB - TXN	https://www.proteomicsdb.org/proteomicsdb/#human/proteinDetails/52616/assay										x	MAP3K5|MELK|EGFR|MAP2K2|CDK2|	Low confidence	Low confidence
TYK2	ProteomicsDB - TYK2	https://www.proteomicsdb.org/proteomicsdb/#human/proteinDetails/54601/assay	x	?	?									High confidence	High confidence	0.7
U2AF1;U2AF1L4	ProteomicsDB - U2AF1	https://www.proteomicsdb.org/proteomicsdb/#human/proteinDetails/57906/assay			x									High confidence	High confidence	658
UBA1	ProteomicsDB - UBA1	https://www.proteomicsdb.org/proteomicsdb/#human/proteinDetails/53983/assay			x									Low confidence				Low confidence
UBAP2L	ProteomicsDB - UBAP2L	https://www.proteomicsdb.org/proteomicsdb/#human/proteinDetails/59867/assay										x	NLK|NTRK1|ILK	Low confidence	Low confidence
UBASH3B	ProteomicsDB - UBASH3B	https://www.proteomicsdb.org/proteomicsdb/#human/proteinDetails/74552/assay										x	EGFR|SYK|AURKB|ABL1|MAP3K1|CSK	High confidence	High confidence	19
UBE3C	ProteomicsDB - UBE3C	https://www.proteomicsdb.org/proteomicsdb/#human/proteinDetails/60555/assay										x	NTRK1|TLK1|PHKA2	Low confidence	Low confidence
UGGT1	ProteomicsDB - UGGT1	https://www.proteomicsdb.org/proteomicsdb/#human/proteinDetails/83277/assay										x	NTRK1	Low confidence	Low confidence
ULK1	ProteomicsDB - ULK1	https://www.proteomicsdb.org/proteomicsdb/#human/proteinDetails/49958/assay	x		x									High confidence	High confidence	28
ULK3	ProteomicsDB - ULK3	https://www.proteomicsdb.org/proteomicsdb/#human/proteinDetails/67125/assay	x		x									High confidence	High confidence	6
UNC119	ProteomicsDB - UNC119	https://www.proteomicsdb.org/proteomicsdb/#human/proteinDetails/59426/assay										x	LYN|LCK|FYN|RPS6KA5|ZAK|HCK|PSKH1|PRKG2|PSKH2|LIMK2|(BCR)|MAPK1	High confidence	High confidence	6		Low confidence
VDAC3	ProteomicsDB - VDAC3	https://www.proteomicsdb.org/proteomicsdb/#human/proteinDetails/85680/assay			x							x	NTRK1|SRC	Low confidence	Low confidence
WEE1	ProteomicsDB - WEE1	https://www.proteomicsdb.org/proteomicsdb/#human/proteinDetails/54650/assay	x		x									High confidence	High confidence	12	High confidence
YARS	ProteomicsDB - YARS	https://www.proteomicsdb.org/proteomicsdb/#human/proteinDetails/56686/assay			x							x	NTRK1|CDK2|EGFR	Low confidence	Low confidence
YES1	ProteomicsDB - YES1	https://www.proteomicsdb.org/proteomicsdb/#human/proteinDetails/52044/assay	x		x									High confidence	High confidence	1	High confidence
YTHDF2	ProteomicsDB - YTHDF2	https://www.proteomicsdb.org/proteomicsdb/#human/proteinDetails/86326/assay												Low confidence			Low confidence
YTHDF3;YTHDF1	ProteomicsDB - YTHDF3	https://www.proteomicsdb.org/proteomicsdb/#human/proteinDetails/69483/assay										x	NTRK1	Low confidence	Low confidence
YWHAG	ProteomicsDB - YWHAG	https://www.proteomicsdb.org/proteomicsdb/#human/proteinDetails/57355/assay										x	RAF1|ABL1|BRAF|ARAF|LRRK2|CDK11B|LATS2|MAP3K2|MARK2|IGF1R|PI4KB|MARK3|PAK4|CDK2|AKT1|MAP3K1|GRK5|MST1R|MAPK7|KDR|NTRK1|PAK2|PAK6|TNK1|WNK1|CLK3|CLK2|DYRK1A|CLK1|PRKCA|PRKCD|PRKCB|CDK16|PRKCZ|PRKCG|PRKCQ|MAP3K3|PAK1|GSK3A|PIK3C3|CDK17	Low confidence	Low confidence
YWHAQ	ProteomicsDB - YWHAQ	https://www.proteomicsdb.org/proteomicsdb/#human/proteinDetails/54380/assay										x	RAF1|ABL1|MARK2|BRAF|PRKD1|PRKZ|MARK3|CDK11B|EGFR|PRKCQ|PRKDC|PDPK1|CDK18|PAK4|WEE1|NTRK1|ARAF|PRKD2|MAP3K2|MTOR|CDK17|SIK3|ADCK2|WNK4	Low confidence	Low confidence
ZAK	ProteomicsDB - ZAK	https://www.proteomicsdb.org/proteomicsdb/#human/proteinDetails/83246/assay	x		x									High confidence	High confidence	41	High confidence	High confidence

## Sheet: Kinobeads
Drug	Lysate	Beads	Gene Name	Relative Intensity DMSO	Relative Intensity 3 nM	Relative Intensity 10 nM	Relative Intensity 30 nM	Relative Intensity 100 nM	Relative Intensity 300 nM	Relative Intensity 1000 nM	Relative Intensity 3000 nM	Relative Intensity 30000 nM	DMSO Intensity	Intensity Type	Slope	Bottom	Top	Inflection	EC50	EC50 Standard Error	Correction Factor	Apparent Kd	R2	BIC	Target Classification
Abemaciclib	4 cell line mix	Kinobeads	AAK1	1	0.905556	0.791054	0.738292	0.639565	0.323354	0.181984	0.0634211	0.0571028	136300000	Normalized LFQ intensity	0.773714	0.00909176	0.957905	151.289	151.289	45.697	0.673073	101.828	0.985386	-20.5035	High confidence
Abemaciclib	4 cell line mix	Kinobeads	ADCK1	1	1.04597	0.869866	1.14157	0	0	0	0	0	10460000	Normalized LFQ intensity	12.0514	-0.00120038	1.01436	63.9355	63.9355	68.833	0.622595	39.8059	0.98352	-12.6061	High confidence
Abemaciclib	4 cell line mix	Kinobeads	BMP2K	1	1.1017	1.0123	1.08789	0.97374	0.86323	0.885498	0.862572	0.313434	72050000	Normalized LFQ intensity	0.603088	-1.00328	1.03456	84774.1	84774.1	217756	0.660952	56031.6	0.937247	-15.3305	High confidence
Abemaciclib	4 cell line mix	Kinobeads	CAMK2D	1	0.894551	0.984481	0.900583	0.440384	0.178266	0.021331	0.0042195	0.0174241	888660000	Normalized LFQ intensity	1.77488	0.0186902	0.97285	95.3734	95.3734	12.1314	0.203913	19.4479	0.992088	-22.4869	High confidence
Abemaciclib	4 cell line mix	Kinobeads	CAMK2G	1	1.12544	1.56525	1.23645	0.315507	0.139777	0.0134313	0.00538175	0.0174731	266400000	Normalized LFQ intensity	6.256	0.0432645	1.23233	82.3638	82.3638	NA	0.217204	17.8898	0.939239	1.73462	High confidence
Abemaciclib	4 cell line mix	Kinobeads	CAMKK2	1	0.926425	0.861896	0.941537	0.742063	0.619142	0.723119	0.529284	0	14020000	Normalized LFQ intensity	0.664257	-0.113462	0.920528	3911.21	3911.21	3766.17	0.664348	2598.41	0.91067	-7.53283	High confidence
Abemaciclib	4 cell line mix	Kinobeads	CCNA2	1	1.10775	1.68223	0.892227	1.34816	1.38703	0	0	0	5602500	Normalized LFQ intensity	11.3119	-0.00177097	1.23624	678.691	678.691	1291.15	0.86194	584.991	0.877904	9.05237	High confidence
Abemaciclib	4 cell line mix	Kinobeads	CCNB1	1	0.893231	0.887648	0.817281	0.938596	0.972639	0.751616	0.495589	0.351498	6886000	Normalized LFQ intensity	2.07747	0.356215	0.918657	1657.65	1657.65	523.273	0.766242	1270.16	0.939052	-16.6538	High confidence
Abemaciclib	4 cell line mix	Kinobeads	CCNE1	1	2.60828	1.01759	2.57809	2.41831	1.73133	0.98061	0.507527	0	1222300	Normalized Intensity	1.61856	-0.00256781	1.91836	1224.48	1224.48	1625.93	0.728854	892.465	0.599576	26.315	Low confidence
Abemaciclib	4 cell line mix	Kinobeads	CCNT1	1	0.87959	0.824165	0.840515	0.753519	0.341151	0.255213	0.102503	0.0290586	48542000	Normalized LFQ intensity	1.04087	0.0395422	0.926623	239.721	239.721	81.667	0.983173	235.687	0.973332	-14.8981	High confidence
Abemaciclib	4 cell line mix	Kinobeads	CCNT2	1	1.38815	0.793999	1.64718	0.835646	0.236543	0.0427767	0	0	5772300	Normalized Intensity	2.64929	0.022549	1.19986	150.062	150.062	92.4942	0.880012	132.057	0.850855	9.81085	High confidence
Abemaciclib	4 cell line mix	Kinobeads	CDK16	1	1.11328	0.668597	0.923386	0	0	0	0	0	8626100	Normalized LFQ intensity	7.81814	-0.00116907	0.92895	53.2817	53.2817	72.299	0.942646	50.2258	0.946928	-3.37366	High confidence
Abemaciclib	4 cell line mix	Kinobeads	CDK2	1	0.881417	0.97895	0.804046	0.689487	0.866051	0.725833	0.656485	0.381148	274510000	Normalized LFQ intensity	0.342122	-0.0641584	0.970421	19695	19695	49550.4	0.532482	10487.2	0.847813	-11.2842	High confidence
Abemaciclib	4 cell line mix	Kinobeads	CDK4	1	2.10822	2.39806	2.55836	0.638239	0.669925	0.120657	0	0	2035600	Normalized Intensity	32.53	0.198404	2.01611	96.5494	96.5494	207.337	1	96.5494	0.792027	21.9819	High confidence
Abemaciclib	4 cell line mix	Kinobeads	CDK6	1	0.983592	1.16163	0.806036	0.449799	0	0.253991	0	0	9333000	Normalized LFQ intensity	1.88372	0.0540235	1.03993	71.428	71.428	24.2587	0.819855	58.5606	0.950397	-4.86403	High confidence
Abemaciclib	4 cell line mix	Kinobeads	CDK9	1	1.0579	1.00649	0.858902	0.804875	0.470718	0.243012	0.139084	0.0660975	179700000	Normalized LFQ intensity	1.04073	0.0636223	1.02412	245.175	245.175	45.0276	0.711499	174.442	0.99164	-24.0933	High confidence
Abemaciclib	4 cell line mix	Kinobeads	CIT	1	1.12994	1.08536	1.2897	1.67215	1.13988	0.548157	0.342155	0.0985288	47863000	Normalized LFQ intensity	2.5456	0.1952	1.23279	798.333	798.333	374.853	1.21394	798.333	0.843051	6.21281	High confidence
Abemaciclib	4 cell line mix	Kinobeads	CLK1	1	1.1544	0	0.696317	0	0	0	0	0	5270900	Normalized LFQ intensity	1.03865	-0.00114022	1.09023	9.25593	9.25593	15.3021	0.715477	6.62241	0.689329	12.0761	High confidence
Abemaciclib	4 cell line mix	Kinobeads	CLK4	1	1.29009	0.640786	0	0.768994	0	0	0	0	1562300	Normalized Intensity	1.02084	0.0100915	1.15779	15.7049	15.7049	NA	0.84504	13.2713	0.690996	13.0518	Low confidence
Abemaciclib	4 cell line mix	Kinobeads	CSNK2A1;CSNK2A3	1	0.527821	0.411013	0.28662	0.134094	0.0553305	0.0486389	0.0179512	0.107771	87801000	Normalized LFQ intensity	0.615172	0.033851	0.995986	4.02209	4.02209	1.24366	1.01946	4.02209	0.986309	-23.6522	High confidence
Abemaciclib	4 cell line mix	Kinobeads	CSNK2A2	1	0.938888	0.729797	0.365928	0.121712	0.0235662	0.0106305	0	0.0281351	147670000	Normalized LFQ intensity	1.38048	0.0106371	1.00288	20.052	20.052	0.76917	0.962701	19.3041	0.999425	-47.2818	High confidence
Abemaciclib	4 cell line mix	Kinobeads	CSNK2B	1	1.65781	0.815403	0.795379	0.415957	0	0	0	0	17649000	Normalized LFQ intensity	1.24425	-0.00206882	1.24624	43.897	43.897	32.1001	1.08129	43.897	0.8726	7.41199	High confidence
Abemaciclib	4 cell line mix	Kinobeads	DCAF7	1	0.918309	1.04889	0.564134	0.334183	0.274368	0	0	0.194037	5029900	Normalized LFQ intensity	1.32085	0.0910715	1.01398	43.3054	43.3054	19.572	0.89643	38.8202	0.941428	-5.76151	High confidence
Abemaciclib	4 cell line mix	Kinobeads	DYRK1A	1	0.839712	0.917808	0.935542	0.531892	0.491765	0	0	0	7560000	Normalized LFQ intensity	1.16801	-0.040268	0.938881	218.254	218.254	87.9807	0.933007	203.632	0.956214	-7.90289	High confidence
Abemaciclib	4 cell line mix	Kinobeads	EIF2AK1	1	0.887639	0.673451	1.00914	1.32621	1.07082	1.1504	0.88758	0	5187800	Normalized LFQ intensity	3.52238	-0.00152856	1.01657	5247.48	5247.48	9928.4	0.921519	4835.65	0.781817	4.35551	High confidence
Abemaciclib	4 cell line mix	Kinobeads	EIF3J	1	2.80252	1.44125	1.98297	0.524033	0.165092	0.0993883	0.076544	0.0888055	21154000	Normalized LFQ intensity	7.52451	0.107629	1.80662	86.0966	86.0966	90.5242	1.10588	86.0966	0.766297	22.1016	High confidence
Abemaciclib	4 cell line mix	Kinobeads	EIF4G1	1	0.829661	0.465198	1.01086	1.39811	0.767948	0.7827	0	0	6585600	Normalized LFQ intensity	6.76221	1.5344e-05	0.912023	1304.36	1304.36	4522.22	1.47723	1304.36	0.723123	10.1646	High confidence
Abemaciclib	4 cell line mix	Kinobeads	GAK	1	0.963194	0.912344	0.913823	1.04411	1.02469	0.907742	0.728065	0.333482	675530000	Normalized LFQ intensity	1.84203	0.318827	0.974918	3906.63	3906.63	1260.88	0.56156	2193.81	0.957481	-20.0746	High confidence
Abemaciclib	4 cell line mix	Kinobeads	GSK3A	1	0.90911	0.847335	0.473269	0.179668	0.151829	0.0708785	0.0272881	0.101534	269450000	Normalized LFQ intensity	1.54166	0.0794065	0.979373	26.6951	26.6951	3.41025	0.500216	13.3533	0.992684	-25.3685	High confidence
Abemaciclib	4 cell line mix	Kinobeads	GSK3B	1	1.11242	1.21741	0.523083	0.349351	0.210316	0.164294	0.0541451	0.102452	259560000	Normalized LFQ intensity	9.97265	0.17611	1.10995	28.4602	28.4602	10.9778	0.464999	13.2339	0.955991	-6.52797	High confidence
Abemaciclib	4 cell line mix	Kinobeads	ICK	1	0.579904	0.530184	0.626291	0.536815	0.415902	0	0	0	2789600	Normalized Intensity	0.387158	-0.108844	0.947274	78.7039	78.7039	130.139	0.677837	53.3484	0.874919	-2.33757	High confidence
Abemaciclib	4 cell line mix	Kinobeads	IRAK1	1	0.979203	0.678831	0.751292	0.556582	0.416317	0.279249	0	0	11624000	Normalized LFQ intensity	0.539868	-0.105027	0.998964	206.248	206.248	146.989	0.610351	125.883	0.961185	-11.3822	High confidence
Abemaciclib	4 cell line mix	Kinobeads	MAP4K4	1	0.780606	0.416491	0.641699	0.838356	0.459804	0.506406	0	0	3749700	Normalized LFQ intensity	3.22819	-0.0148375	0.692444	1321.54	1321.54	819.104	1.01351	1321.54	0.736562	4.46917	High confidence
Abemaciclib	4 cell line mix	Kinobeads	MAPK8	1	0.835942	1.05737	0.79714	0.66735	0.741684	0.689367	0.341422	0.172682	172920000	Normalized LFQ intensity	0.400481	-0.269494	0.986339	5795.88	5795.88	26521.6	0.648022	3755.86	0.882324	-6.31185	High confidence
Abemaciclib	4 cell line mix	Kinobeads	PIGT	1	1.65628	1.29258	1.33417	0.868257	0.667011	0	0	0	1751200	Normalized LFQ intensity	1.37415	-0.0498946	1.32703	239.572	239.572	124.348	1.08955	239.572	0.913585	5.25957	Low confidence
Abemaciclib	4 cell line mix	Kinobeads	PIM1	1	0.878203	0.774752	0.491771	0.355403	0.396559	0.365883	0.280857	0.169484	28578000	Normalized LFQ intensity	0.946484	0.274494	1.00565	16.763	16.763	6.95795	0.426106	7.14282	0.956934	-15.1518	High confidence
Abemaciclib	4 cell line mix	Kinobeads	PRKCA	1	1.44635	1.19681	1.14465	0.833606	0.980367	0.588215	0.309535	0.169151	49996000	Normalized LFQ intensity	0.849689	0.105258	1.20148	728.299	728.299	605.761	0.728153	530.313	0.884568	0.518249	High confidence
Abemaciclib	4 cell line mix	Kinobeads	PRKCB	1	1.17836	0.905859	1.23745	1.42726	0.927374	0.836511	0.581698	0.221478	126380000	Normalized LFQ intensity	1.23406	0.197431	1.13069	2035.49	2035.49	1734.48	0.797918	1624.15	0.808058	2.25596	High confidence
Abemaciclib	4 cell line mix	Kinobeads	PRKCD	1	1.29908	1.16556	1.28008	1.44412	1.22418	0.734857	0.573008	0.370653	21812000	Normalized LFQ intensity	2.75363	0.453867	1.24207	839.1	839.1	300.64	0.947106	794.717	0.882501	-1.73953	High confidence
Abemaciclib	4 cell line mix	Kinobeads	PRKD2	1	1.01423	0.876829	0.88	0.910732	0.926423	0.701813	0.500423	0.10122	67244000	Normalized LFQ intensity	1.01602	0.0163035	0.951057	3130.81	3130.81	1604.91	0.659146	2063.66	0.97249	-18.7344	High confidence
Abemaciclib	4 cell line mix	Kinobeads	PRKD3	1	0.702373	0.755755	0.658638	0.691543	0.804166	0.635202	0.323714	0	9159400	Normalized LFQ intensity	1.8043	-0.00121111	0.770605	2487.57	2487.57	1029.19	0.740225	1841.36	0.88491	-6.14361	High confidence
Abemaciclib	4 cell line mix	Kinobeads	Q6ZSR9	1	0.710485	0.60791	0.587925	0.569504	0.329964	0.165589	0	0	47673000	Normalized LFQ intensity	0.411901	-0.124771	0.965734	115.252	115.252	103.415	0.761466	87.7607	0.958343	-12.523	High confidence
Abemaciclib	4 cell line mix	Kinobeads	STK10	1	1.04269	1.03409	1.07803	1.46688	1.12262	0.881055	0.656626	0.221637	104200000	Normalized LFQ intensity	1.47914	0.203002	1.12331	2698.3	2698.3	1780.08	0.915468	2470.21	0.83058	0.33674	High confidence
Abemaciclib	4 cell line mix	Kinobeads	STK16	1	0.896362	1.09015	0.676568	0.382016	0.467811	0.576074	0.418901	0	7394500	Normalized LFQ intensity	0.360437	-0.134228	1.03885	687.967	687.967	3537.6	0.720023	495.352	0.786335	2.4098	High confidence
Abemaciclib	4 cell line mix	Kinobeads	TAOK1	1	1.7011	0.883186	1.19135	0.811474	0.576938	0	0.492544	0	4666900	Normalized LFQ intensity	1.25856	0.144885	1.22992	161.64	161.64	159.398	0.664809	107.46	0.758516	11.8564	High confidence
Abemaciclib	4 cell line mix	Kinobeads	TAOK3	1	0.911895	0.863179	0.773524	1.10506	0.820992	0.739481	0.47142	0.189049	37661000	Normalized LFQ intensity	1.39265	0.170362	0.922449	2224.46	2224.46	1195.74	0.773652	1720.96	0.885171	-6.97362	High confidence
AC-480	4 cell line mix	Kinobeads	EGFR	1	0.602416	0	0	0	0	0	0	0	4555100	Normalized LFQ intensity	6.01584	-0.000997405	1.00007	3.21538	3.21538	0.00830587	0.793047	2.54995	0.999994	-91.4925	High confidence
AC-480	4 cell line mix	Kinobeads	MAP2K5	1	0.950992	0.12424	0.867099	0.965544	0.324304	0.234213	0.451534	0.068803	18673000	Normalized LFQ intensity	0.227403	-0.513438	0.986827	6767.59	6767.59	72909	0.875759	5926.78	0.456131	12.9828	Low confidence
ACTB-1003	4 cell line mix	Kinobeads	BCR	1	1.14528	0.825736	1.20015	0.991472	0.995933	0.80258	0.852504	0.539241	33504000	Normalized LFQ intensity	0.633721	0.315368	1.04374	8802.12	8802.12	51024.1	0.477847	4206.07	0.684971	-3.95158	High confidence
ACTB-1003	4 cell line mix	Kinobeads	DDR1	1	1.22444	1.04885	0.992728	0.980293	0.637726	0.373765	0	0	14774000	Normalized LFQ intensity	1.17495	-0.0443672	1.08539	500.758	500.758	154.144	0.627266	314.109	0.972787	-10.6939	High confidence
ACTB-1003	4 cell line mix	Kinobeads	DDR2	1	1.04593	1.10533	1.11946	1.10599	1.10813	0.940489	0.714264	0	46807000	Normalized LFQ intensity	1.70136	-0.00117111	1.0769	4264.78	4264.78	867.387	0.762065	3250.04	0.984099	-20.0527	High confidence
ACTB-1003	4 cell line mix	Kinobeads	FGFR1	1	1.04646	0.944859	0	1.12262	0	0	0	0	4249400	Normalized LFQ intensity	0.714668	-0.00113042	1.04307	54.6811	54.6811	140.862	0.736349	40.2644	0.571229	16.8874	High confidence
ACTB-1003	4 cell line mix	Kinobeads	FLT3	1	0.791716	0.71425	0.841484	0.837713	0.541595	0.35953	0.271505	0	14696000	Normalized LFQ intensity	0.724814	-0.0395586	0.882551	864.89	864.89	744.414	0.537356	464.754	0.931975	-8.86379	High confidence
ACTB-1003	4 cell line mix	Kinobeads	FRK	1	0.878254	0.968049	0.970315	1.06224	0.939844	0.842558	0.700929	0.235164	210230000	Normalized LFQ intensity	1.14079	0.129778	0.973832	5486.47	5486.47	4135.94	0.339663	1863.55	0.960398	-18.46	High confidence
ACTB-1003	4 cell line mix	Kinobeads	MAP3K11	1	1.02752	0.947497	0.884399	0.815925	0.929074	0.731217	0.597715	0	7643500	Normalized LFQ intensity	1.14157	-0.0484822	0.940863	4340.09	4340.09	1986.48	0.696515	3022.94	0.956807	-13.3645	High confidence
ACTB-1003	4 cell line mix	Kinobeads	MAP4K2	1	1.11558	1.06733	1.09769	0.919792	1.10308	0.864774	0.740644	0.198841	24200000	Normalized LFQ intensity	0.937435	-0.0203265	1.0591	7051.81	7051.81	9407.62	0.590017	4160.69	0.948821	-13.4254	High confidence
ACTB-1003	4 cell line mix	Kinobeads	MAPK9	1	0.635461	0.796737	1.17782	1.06237	0.873866	0.750623	0.410063	0.116053	50949000	Normalized LFQ intensity	1.71531	0.108643	0.929221	2157.01	2157.01	1378.08	0.699871	1509.63	0.785964	1.83482	High confidence
ACTB-1003	4 cell line mix	Kinobeads	PRKCD	1	0.961401	0.982688	1.1097	0.956103	0.959117	0.900123	0.805294	0.563242	40389000	Normalized LFQ intensity	0.863712	0.463867	1.00615	5359.5	5359.5	7817.97	0.947106	5076.01	0.918617	-20.7014	High confidence
ACTB-1003	4 cell line mix	Kinobeads	RET	1	1.28707	0.569077	0.930506	0.837282	0.26638	0.0157526	0	0	88772000	Normalized LFQ intensity	2.63062	-0.00125159	0.949186	210.91	210.91	99.2412	0.440569	92.9204	0.865642	4.66995	High confidence
ACTB-1003	4 cell line mix	Kinobeads	RPS6KA1	1	1.231	1.05646	1.04063	1.10456	0.910123	0.87089	0.835291	0.436994	704000000	Normalized LFQ intensity	0.675799	0.258779	1.09441	5499.21	5499.21	6960.53	0.751989	4135.34	0.883185	-10.6272	High confidence
ACTB-1003	4 cell line mix	Kinobeads	RPS6KA3	1	1.14595	1.08194	1.04511	1.06052	1.04314	0.932786	0.969531	0.603675	273220000	Normalized LFQ intensity	1.04181	0.512064	1.06413	7318.19	7318.19	5902.35	0.724844	5304.55	0.896842	-18.3323	High confidence
ACTB-1003	4 cell line mix	Kinobeads	RPS6KA6	1	1.36913	1.0732	1.20581	1.21056	1.0362	1.04285	0.869958	0.393041	56241000	Normalized LFQ intensity	0.963447	0.223901	1.16467	6371.82	6371.82	10849.4	0.421785	2687.54	0.852583	-4.89335	High confidence
ACTB-1003	4 cell line mix	Kinobeads	TNK1	1	1.22357	0.870428	1.00359	1.03894	1.00446	0.581822	0.655594	0	8193700	Normalized LFQ intensity	0.943623	-0.00456367	1.03886	2924.27	2924.27	2561.62	0.432597	1265.03	0.875041	-1.36005	High confidence
AEE-788	4 cell line mix	Kinobeads	ABL1	1	1.05349	0.952075	1.15692	0.804426	0.735855	0.612519	0.517987	0.164779	173610000	Normalized LFQ intensity	0.57152	-0.00428039	1.05323	1990.27	1990.27	2993.8	0.547922	1090.51	0.926845	-9.10696	High confidence
AEE-788	4 cell line mix	Kinobeads	ABL2	1	1.07015	0.962572	1.06798	0.990899	0.880967	0.862102	0.740658	0.263995	116960000	Normalized LFQ intensity	0.572943	-0.697796	1.03002	45035.9	45035.9	129371	0.331378	14923.9	0.973	-21.931	High confidence
AEE-788	4 cell line mix	Kinobeads	ACVR1	1	0.980372	0.995485	0.87235	0.879351	0.86921	0.69949	0.697461	0.318902	11474000	Normalized LFQ intensity	0.431448	-0.365419	0.995636	33675.2	33675.2	60604.9	0.478716	16120.9	0.967024	-22.7179	High confidence
AEE-788	4 cell line mix	Kinobeads	BCR	1	0.968278	0.644598	1.06018	0.905421	0.559013	0.414928	0.371814	0.0387582	66311000	Normalized LFQ intensity	0.690255	-0.0271152	0.955246	1035.18	1035.18	1734.06	0.477847	494.656	0.85149	-0.681981	High confidence
AEE-788	4 cell line mix	Kinobeads	DDR1	1	0.992566	0.910505	0.984614	0.994814	1.04576	0.842506	0.848268	0	11367000	Normalized LFQ intensity	1.75625	-0.0894861	0.974652	8327.39	8327.39	5575.24	0.627266	5223.49	0.972407	-17.0611	High confidence
AEE-788	4 cell line mix	Kinobeads	DDR2	1	0.947199	0.976286	1.06255	0.924333	0.851995	0.792725	0.764076	0.319491	46713000	Normalized LFQ intensity	0.552154	-0.419828	0.994642	36993.7	36993.7	75363	0.762065	28191.6	0.955579	-19.7329	High confidence
AEE-788	4 cell line mix	Kinobeads	EGFR	1	1.05484	0.925722	0.930364	0.768745	0.614791	0.335169	0.19485	0	14870000	Normalized LFQ intensity	0.763302	-0.0390735	1.02143	507.605	507.605	105.899	0.793047	402.555	0.993977	-27.7291	High confidence
AEE-788	4 cell line mix	Kinobeads	EPHB4	1	1.12069	0.971468	0.948918	0.871797	0.808334	0.892453	0.8193	0.38058	35615000	Normalized LFQ intensity	0.523326	-0.408032	1.00165	53349.5	53349.5	118973	0.494832	26399	0.875826	-11.6621	High confidence
AEE-788	4 cell line mix	Kinobeads	GRB2	1	0.794853	0.758632	0.871596	0.825537	0.740521	0.549661	0.387759	0.488919	12198000	Normalized LFQ intensity	1.93185	0.439666	0.853626	514.568	514.568	285.329	0.623754	320.964	0.867244	-11.8925	High confidence
AEE-788	4 cell line mix	Kinobeads	INPPL1	1	1.24744	1.25561	1.20776	0.926654	0.957739	0.744683	0	0	10561000	Normalized LFQ intensity	4.00466	-0.00165952	1.1005	1196.7	1196.7	458.57	0.483409	578.496	0.939403	-2.53468	High confidence
AEE-788	4 cell line mix	Kinobeads	LIMK1	1	1.08217	0.900955	0.887146	1.12678	0.806205	0	0.777931	0	7202900	Normalized LFQ intensity	0.670008	-0.000776566	1.04135	1063.39	1063.39	7838.44	0.594601	632.29	0.613682	11.7337	High confidence
AEE-788	4 cell line mix	Kinobeads	LIMK2	1	0.979704	0.940372	0.976459	0.981496	0.991668	0.789508	0.788612	0.317276	28312000	Normalized LFQ intensity	0.676293	-0.391261	0.986919	32841	32841	113824	0.662896	21770.2	0.966741	-22.3397	High confidence
AEE-788	4 cell line mix	Kinobeads	MAP2K5	1	1.22291	1.08264	1.05945	1.13774	0.893683	0.853339	1.00955	0.372515	16367000	Normalized LFQ intensity	0.942529	0.141644	1.07322	10768.3	10768.3	12990.5	0.875759	9430.45	0.803377	-4.29526	High confidence
AEE-788	4 cell line mix	Kinobeads	MAP3K4	1	1.09309	1.04981	1.05662	1.1677	0.784031	0.881196	0.763783	0.488988	18203000	Normalized LFQ intensity	0.687643	0.376187	1.06873	3259.07	3259.07	6031.71	0.671624	2188.87	0.829773	-8.29407	High confidence
AEE-788	4 cell line mix	Kinobeads	MAP4K2	1	0.918271	0.793036	1.08698	0.992505	0.9397	0.78854	0.664361	0	22275000	Normalized LFQ intensity	1.22553	-0.115327	0.955236	5990.01	5990.01	4675.2	0.590017	3534.21	0.936496	-9.50499	High confidence
AEE-788	4 cell line mix	Kinobeads	MAP4K4	1	1.36967	1.02095	1.29883	0.971037	0.999586	1.053	0.943731	0.474898	2807800	Normalized LFQ intensity	0.963943	0.309974	1.12758	7979.37	7979.37	15359.9	1.01351	7979.37	0.705177	-0.353363	High confidence
AEE-788	4 cell line mix	Kinobeads	MAP4K5	1	1.05653	0.952111	1.1147	1.00239	0.820777	0.904715	0.846293	0.253871	87158000	Normalized LFQ intensity	0.68979	-1.05761	1.01275	67480.1	67480.1	175610	0.744124	50213.6	0.920294	-11.9326	High confidence
AEE-788	4 cell line mix	Kinobeads	NEK3	1	1.0269	1.02597	0.987306	0.893392	0.881764	0.684028	0.903746	0.453473	18836000	Normalized LFQ intensity	0.421259	-0.146361	1.02047	44561.5	44561.5	150596	0.854721	38087.7	0.814981	-9.59219	High confidence
AEE-788	4 cell line mix	Kinobeads	PDGFRB	1	0.778085	0.757006	0.886687	0.818447	0.740784	0.81155	0.636845	0.286663	12671000	Normalized LFQ intensity	0.83405	0.050213	0.848998	10736.1	10736.1	31893.3	0.873974	9383.09	0.854336	-10.8992	High confidence
AEE-788	4 cell line mix	Kinobeads	SIK2	1	1.00493	0.903849	0.949823	0.766199	0.746946	0.789284	0.682148	0.266874	29887000	Normalized LFQ intensity	0.395298	-0.72525	0.983663	80646.1	80646.1	181583	0.518256	41795.3	0.929052	-14.9428	High confidence
AEE-788	4 cell line mix	Kinobeads	SLK	1	1.0265	0.851209	0.989292	0.811854	0.76353	0.746104	0.697268	0.235372	201550000	Normalized LFQ intensity	0.410068	-0.983866	0.984252	111409	111409	300650	0.890695	99231.8	0.92865	-13.9436	High confidence
AEE-788	4 cell line mix	Kinobeads	STK10	1	1.05562	0.850214	0.905886	0.80361	0.768092	0.651072	0.560634	0.140413	67520000	Normalized LFQ intensity	0.376765	-0.849108	1.00773	46479.4	46479.4	110813	0.915468	42550.4	0.968075	-18.6862	High confidence
AEE-788	4 cell line mix	Kinobeads	TNK2	1	1.1223	0.825565	0.993381	0.965944	0.901758	0.831819	0.532025	0.27706	17886000	Normalized LFQ intensity	1.44436	0.257784	0.978886	2233.99	2233.99	957.842	0.450162	1005.66	0.915898	-10.7612	High confidence
AEE-788	4 cell line mix	Kinobeads	WEE1	1	0.997593	0.876333	1.01276	0.870074	0.742002	0.759079	0.72977	0.205558	64945000	Normalized LFQ intensity	0.468884	-1.10868	0.975639	102956	102956	267189	0.632874	65158	0.931169	-13.6006	High confidence
AEE-788	4 cell line mix	Kinobeads	YES1	1	1.09082	0.915122	0.992646	0.908766	0.789245	0.783856	0.814568	0.386392	46859000	Normalized LFQ intensity	0.441037	-0.274344	1.01243	41512.7	41512.7	98294.1	0.41317	17151.8	0.88905	-12.9412	High confidence
AEE-788	4 cell line mix	Kinobeads	ZAK	1	0.981036	0.910178	1.16788	0.99015	0.91253	0.874161	0.755427	0.218366	15230000	Normalized LFQ intensity	0.769853	-0.32152	1.00946	18340.2	18340.2	63448.5	0.743597	13637.7	0.930087	-12.1958	High confidence
AEW-541	4 cell line mix	Kinobeads	ACVR1	1	0.967932	0.742768	0.993765	0.844182	0.644004	0.736844	0.558267	0.438927	86747000	Normalized LFQ intensity	0.361943	0.208205	0.993491	2510.74	2510.74	13393.3	0.478716	1201.93	0.809062	-8.41063	High confidence
AEW-541	4 cell line mix	Kinobeads	ADCK3	1	0.847072	0.962406	0.921088	0.805448	0.771322	0.565344	0.540043	0.352479	31424000	Normalized LFQ intensity	0.618027	0.286727	0.961651	937.761	937.761	885.168	0.890745	835.306	0.952186	-19.1787	High confidence
AEW-541	4 cell line mix	Kinobeads	ATR	1	0.639934	0.32663	0.126717	0	0	0	0	0	872730	Normalized Intensity	1.12957	-0.00185359	0.998332	5.14822	5.14822	0.292837	1.10895	5.14822	0.998788	-43.2856	Low confidence
AEW-541	4 cell line mix	Kinobeads	BMPR1B	1	0.727888	0.768037	0.904523	0.693495	0.642991	0.56378	0.65121	0.458689	10833000	Normalized LFQ intensity	0.194766	0.181573	0.993204	2349.12	2349.12	11674.5	0.613955	1442.26	0.803432	-11.5842	High confidence
AEW-541	4 cell line mix	Kinobeads	COMT	1	1.00775	1.07532	1.323	1.19145	1.22548	0.929708	0.733973	0	18105000	Normalized LFQ intensity	1.59609	-0.00136821	1.12937	4102.65	4102.65	1888.95	1.22504	4102.65	0.919144	-3.91882	High confidence
AEW-541	4 cell line mix	Kinobeads	CSNK1E	1	1.24479	0.934976	1.21737	0.867696	0.770292	0.960809	0.823639	0.28209	48389000	Normalized LFQ intensity	0.52905	-0.901262	1.06498	70796.1	70796.1	295990	0.85489	60522.9	0.759049	-0.0725462	High confidence
AEW-541	4 cell line mix	Kinobeads	FECH	1	1.01401	0.839047	1.18164	0.74979	0.982746	0.743688	0.651661	0.313575	150020000	Normalized LFQ intensity	0.644206	0.0606692	0.993567	6534.38	6534.38	28792.4	0.994935	6501.28	0.783453	-2.86479	High confidence
AEW-541	4 cell line mix	Kinobeads	HCK	1	0.916079	0.870567	1.09938	0.803461	0.814747	0.595716	0.522226	0.297777	1468100000	Normalized LFQ intensity	0.763133	0.248888	0.972628	1201.49	1201.49	1203.81	0.518348	622.79	0.907057	-10.6774	High confidence
AEW-541	4 cell line mix	Kinobeads	IGF1R	1	0.819017	0.734616	0.88239	0.732682	0.774061	0.541258	0.478238	0.212143	416440000	Normalized LFQ intensity	0.341479	-0.342733	0.945247	14761.8	14761.8	36176.8	0.661793	9769.29	0.920653	-13.1244	High confidence
AEW-541	4 cell line mix	Kinobeads	INSR	1	1.02173	0.944788	1.25165	0.816376	0.982404	0.832056	0.791969	0.540064	96664000	Normalized LFQ intensity	0.627348	0.379762	1.03181	5381.74	5381.74	21873.7	0.750837	4040.81	0.68568	-4.22283	High confidence
AEW-541	4 cell line mix	Kinobeads	LATS1	1	0.945686	0.985077	0.961636	0.884485	0.85609	0.82697	0.639862	0.439826	36985000	Normalized LFQ intensity	0.591558	0.248208	0.983768	4925.9	4925.9	6324.56	0.787536	3879.32	0.977755	-29.112	High confidence
AEW-541	4 cell line mix	Kinobeads	LYN	1	0.92709	0.788702	0.916497	0.791632	0.841151	0.671489	0.607423	0.504255	2182200000	Normalized LFQ intensity	0.310826	0.221823	0.986726	4871.27	4871.27	17842.4	0.501873	2444.76	0.894255	-17.5091	High confidence
AEW-541	4 cell line mix	Kinobeads	MAP2K1	1	1.00524	1.41388	1.21077	1.38453	1.11424	1.24248	0.901943	0.400765	46251000	Normalized LFQ intensity	5.09635	0.401648	1.1963	3325.66	3325.66	1356.67	1.23132	3325.66	0.77836	0.64692	High confidence
AEW-541	4 cell line mix	Kinobeads	MAP2K2	1	1.4153	1.40096	1.45104	1.21969	1.43433	1.03456	0.968952	0.32022	62489000	Normalized LFQ intensity	1.05931	0.151062	1.31733	5762.08	5762.08	9787.9	1.17379	5762.08	0.823382	1.71997	High confidence
AEW-541	4 cell line mix	Kinobeads	MAP2K5	1	1.18752	1.16329	1.05277	0.799536	0.498675	0.299551	0.233792	0.192862	62093000	Normalized LFQ intensity	1.3773	0.211975	1.12276	166.51	166.51	38.3902	0.875759	145.823	0.981857	-16.6305	High confidence
AEW-541	4 cell line mix	Kinobeads	MAP4K2	1	0.821768	0.885701	0.956044	0.884039	0.95523	0.812271	0.719577	0.261633	56383000	Normalized LFQ intensity	1.11741	0.117779	0.917791	7753.72	7753.72	12130.1	0.590017	4574.83	0.940453	-16.9116	High confidence
AEW-541	4 cell line mix	Kinobeads	MAP4K5	1	1.07208	0.980571	1.11114	0.939458	0.977649	0.77849	0.632388	0.273199	345450000	Normalized LFQ intensity	0.857657	0.158683	1.03769	3351.35	3351.35	2316.83	0.744124	2493.82	0.966407	-18.9265	High confidence
AEW-541	4 cell line mix	Kinobeads	MOB1A;MOB1B	1	1.20456	1.3689	1.05527	1.20647	1.06934	0.904929	0.840381	0	9449300	Normalized LFQ intensity	1.35768	-0.0120302	1.14567	4990.55	4990.55	2824.57	0.914475	4563.73	0.905475	-2.47465	High confidence
AEW-541	4 cell line mix	Kinobeads	PKN3	1	1.21686	0.321002	0.203489	0.715579	0.295237	0	0	0	2032200	Normalized Intensity	0.568871	-0.0012428	1.07446	23.3562	23.3562	60.9206	1.05862	23.3562	0.671479	11.2956	Low confidence
AEW-541	4 cell line mix	Kinobeads	PTK6	1	0.832153	0.781847	1.19721	0.812441	0.973206	0.540562	0.576807	0	18690000	Normalized LFQ intensity	0.894809	-0.11703	0.943194	4014.33	4014.33	5791.51	0.483081	1939.25	0.820095	0.948527	High confidence
AEW-541	4 cell line mix	Kinobeads	RET	1	1.1002	1.04137	1.08331	0.920615	0.838699	0.93548	0.790879	0.405649	306150000	Normalized LFQ intensity	0.514088	-0.430866	1.04562	52556.8	52556.8	200922	0.440569	23154.9	0.912401	-14.2245	High confidence
AEW-541	4 cell line mix	Kinobeads	RIPK2	1	0.839058	0.697576	0.996063	0.837649	0.83133	0.52385	0.44086	0.209258	1164100000	Normalized LFQ intensity	1.13594	0.206126	0.887835	1266.29	1266.29	1001.6	0.280618	355.343	0.869833	-6.63281	High confidence
AEW-541	4 cell line mix	Kinobeads	RIPK3	1	0.936303	1.20796	1.66029	1.19527	0.909406	0.758085	0.955737	0	8961400	Normalized LFQ intensity	0.971593	-0.174997	1.15424	7217.01	7217.01	12172.8	0.894178	6453.29	0.698602	10.0425	High confidence
AEW-541	4 cell line mix	Kinobeads	ROCK2	1	0.855542	0.839894	0.974393	0.774686	0.887753	0.733398	0.674998	0.38843	1193100000	Normalized LFQ intensity	0.495543	-0.0492109	0.92781	20949.2	20949.2	69330.3	0.871861	18264.8	0.878705	-13.9407	High confidence
AEW-541	4 cell line mix	Kinobeads	SRC	1	0.84788	0.784072	0.964381	0.750095	0.810342	0.652979	0.634874	0.47394	1841200000	Normalized LFQ intensity	0.284976	0.136691	0.976151	9155.33	9155.33	31968.5	0.388259	3554.64	0.84481	-13.7021	High confidence
AEW-541	4 cell line mix	Kinobeads	STK4	1	1.08348	0.954479	1.18854	0.949255	1.16571	0.887202	0.7834	0.312646	203990000	Normalized LFQ intensity	1.23384	0.234001	1.05394	4949.28	4949.28	5381.98	0.762521	3773.93	0.882774	-7.82296	High confidence
AEW-541	4 cell line mix	Kinobeads	YES1	1	0.809852	0.683895	1.09286	0.675773	0.755876	0.465367	0.504637	0.302764	132070000	Normalized LFQ intensity	0.629706	0.248629	0.911869	816.217	816.217	2779.55	0.41317	337.237	0.722824	-0.831673	High confidence
Afatinib	4 cell line mix	Kinobeads	ADK	1	1.10125	1.48667	1.07784	1.11498	1.37177	1.10673	0.704253	0	2399300	Normalized LFQ intensity	2.39385	-0.00145437	1.18887	3493.26	3493.26	1341.72	1.12458	3493.26	0.876841	1.57246	High confidence
Afatinib	4 cell line mix	Kinobeads	EGFR	1	0.50103	0	0	0	0	0	0	0	5052400	Normalized LFQ intensity	4.21939	-0.00397946	1.00006	3.00832	3.00832	0.0145235	0.793047	2.38574	0.9999	-66.157	High confidence
Afatinib	4 cell line mix	Kinobeads	GAK	1	1.1051	1.00615	1.02547	1.01538	1.00272	0.931173	0.625327	0.203584	285970000	Normalized LFQ intensity	1.71836	0.186387	1.02932	3154.29	3154.29	448.111	0.56156	1771.32	0.988713	-27.3373	High confidence
Afatinib	4 cell line mix	Kinobeads	GRB2	1	1.18654	1.00172	1.11852	1.02292	1.13047	1.02153	0.829582	0.440902	12731000	Normalized LFQ intensity	1.95894	0.429695	1.07587	3828.26	3828.26	1660.49	0.623754	2387.89	0.921144	-14.3183	High confidence
Afatinib	4 cell line mix	Kinobeads	MAPK11	1	0.929032	1.08123	1.3073	1.44043	1.22184	0.860905	0.741909	0	3214900	Normalized LFQ intensity	1.42863	-0.00235418	1.1528	3884.32	3884.32	2740.31	0.723785	2811.41	0.839606	3.41055	High confidence
Afatinib	4 cell line mix	Kinobeads	MAPK14	1	1.09816	1.15193	1.14722	1.06527	0.968552	0.814896	0.503224	0.171431	937810000	Normalized LFQ intensity	1.13944	0.127395	1.09691	2043.98	2043.98	531.509	0.512104	1046.73	0.980787	-19.7878	High confidence
Afatinib	4 cell line mix	Kinobeads	MAPK9	1	1.04798	0.975537	0.825968	0.942182	1.01624	0.927097	0.617913	0.0574967	44570000	Normalized LFQ intensity	2.49659	0.0528739	0.967486	3633.36	3633.36	895.293	0.699871	2542.88	0.961232	-14.5567	High confidence
Afatinib	4 cell line mix	Kinobeads	MAPKAPK2	1	0.917176	1.03183	1.1467	1.07778	0.844028	0.491498	0.322004	0	6557500	Normalized LFQ intensity	1.17526	-0.00120793	1.04213	1131.01	1131.01	457.286	0.7227	817.379	0.960001	-10.1717	High confidence
Afatinib	4 cell line mix	Kinobeads	MET	1	1.64381	0.391551	1.14318	0.226175	0.79866	0.474673	0.128583	0	1507900	Normalized Intensity	0.532043	-0.00240101	1.15959	195.843	195.843	795.359	0.803492	157.359	0.524695	17.7353	Low confidence
Afatinib	4 cell line mix	Kinobeads	MYLK	1	1.09489	0.586428	0.929611	0.599101	0.727329	0.679513	0.472882	0.140181	48289000	Normalized Intensity	0.307706	-0.705459	0.992014	37923.1	37923.1	167248	0.833234	31598.8	0.757635	0.62184	Low confidence
Afatinib	4 cell line mix	Kinobeads	PHKG2	1	1.42645	1.24679	1.45205	1.10272	1.04147	0.938035	0.758121	0	2545800	Normalized LFQ intensity	1.04653	-0.00258016	1.23648	3489.64	3489.64	2614.06	0.969809	3384.29	0.876449	1.70989	High confidence
Afatinib	4 cell line mix	Kinobeads	UNC119	1	1.28462	0.799362	0.697074	0.887901	0.814637	0.389687	0.398586	0.122526	1315800	Normalized Intensity	0.488559	-0.0698462	1.05996	1159.03	1159.03	3019.9	0.72583	841.261	0.807993	1.98719	Low confidence
Alectinib	4 cell line mix	Kinobeads	ACOX1	1	7.32534	7.52522	11.9266	6.30061	2.78322	1.33888	0	0	469780	Normalized Intensity	2.44608	-0.0075656	6.91743	270.95	270.95	287.496	1.27856	270.95	0.557856	53.9224	Low confidence
Alectinib	4 cell line mix	Kinobeads	ACOX3	1	0.919616	1.03335	0.943155	0.97454	0.982306	0.852442	0.609327	0.108395	402030000	Normalized LFQ intensity	1.42759	0.0611491	0.978723	3918.76	3918.76	953.99	0.663938	2601.82	0.987231	-25.6428	High confidence
Alectinib	4 cell line mix	Kinobeads	BRD4	1	1.05382	0.989104	0.818194	0.68881	0.429436	0	0	0	698040	Normalized LFQ intensity	1.15577	-0.0459081	1.00832	200.199	200.199	47.7959	1.19574	200.199	0.984265	-16.0411	Low confidence
Alectinib	4 cell line mix	Kinobeads	CAMKK2	1	0.905342	0.959991	0.85701	0.729481	0.881333	0.80883	0.651792	0.149113	145770000	Normalized LFQ intensity	0.603672	-0.93206	0.92154	53524.9	53524.9	146789	0.664348	35559.2	0.93076	-12.9954	High confidence
Alectinib	4 cell line mix	Kinobeads	CLK1	1	0.97404	1.03557	0.908882	0.697397	0.888766	0.701346	0.815398	0.317203	27614000	Normalized LFQ intensity	0.446009	-0.359005	0.978415	41763.9	41763.9	112480	0.715477	29881.1	0.802391	-6.1561	High confidence
Alectinib	4 cell line mix	Kinobeads	CLK2	1	0.959522	0.97173	0.693085	0.563544	0.521115	0.539778	0.609477	0.16409	25126000	Normalized LFQ intensity	0.279693	-0.213853	1.0349	3586.16	3586.16	32730.5	0.646848	2319.7	0.832791	-4.02709	High confidence
Alectinib	4 cell line mix	Kinobeads	CLK3	1	0.910206	0.922745	0.496419	0.626525	0.578852	0.62539	0.705976	0	12118000	Normalized LFQ intensity	0.327376	-0.000972884	0.976896	1396.91	1396.91	6973.9	1.02868	1396.91	0.65697	4.16612	High confidence
Alectinib	4 cell line mix	Kinobeads	CSNK1G2	1	1.13302	1.55636	1.69102	1.81364	1.60804	0.33476	0.472032	0.331145	8881600	Normalized Intensity	10.8802	0.378323	1.46713	587.511	587.511	1104.54	0.875279	514.236	0.813802	11.2274	Low confidence
Alectinib	4 cell line mix	Kinobeads	EPHA1	1	0.788778	0.820579	0.879847	0.673076	0.784298	0.514182	0.611663	0.515276	22720000	Normalized LFQ intensity	0.261603	0.338404	0.992296	479.506	479.506	2847.51	0.402092	192.805	0.804919	-11.5902	High confidence
Alectinib	4 cell line mix	Kinobeads	FER	1	0.882151	0.918371	0.85424	0.791642	0.956872	0.83055	0.728652	0.281075	1106200000	Normalized LFQ intensity	1.13424	0.124483	0.902574	8899.2	8899.2	28671.5	0.422267	3757.84	0.920806	-15.179	High confidence
Alectinib	4 cell line mix	Kinobeads	GAK	1	0.882792	0.960925	0.911839	0.703169	0.577803	0.370218	0.259753	0.069839	1038400000	Normalized LFQ intensity	0.698731	0.0317459	0.983223	461.15	461.15	161.721	0.56156	258.963	0.986867	-23.0344	High confidence
Alectinib	4 cell line mix	Kinobeads	OSBPL8	1	0.945942	0.826015	0.790625	0.678937	0.463271	0	0	0	2971100	Normalized LFQ intensity	1.27282	-0.0447173	0.914036	255.427	255.427	73.8206	1.08239	255.427	0.97474	-13.2097	Low confidence
Alectinib	4 cell line mix	Kinobeads	PHKA1	1	1.38883	1.28423	1.43674	1.26958	1.43015	0	0	0	3299900	Normalized LFQ intensity	11.74	-0.00161114	1.30158	637.2	637.2	990.46	0.968031	616.829	0.961747	-1.28603	Low confidence
Alectinib	4 cell line mix	Kinobeads	PHKG2	1	1.04389	1.18113	1.0192	1.0758	1.19591	0.592585	0.439167	0	24434000	Normalized LFQ intensity	1.3452	-0.00119245	1.0905	1764.62	1764.62	851.089	0.969809	1711.34	0.9304	-4.69752	High confidence
Alectinib	4 cell line mix	Kinobeads	RET	1	0.983454	1.17348	0.94689	0.795137	0.792674	0.430287	0.324951	0.0520834	235690000	Normalized LFQ intensity	0.768562	-0.000386763	1.04721	838.605	838.605	500.565	0.440569	369.464	0.956635	-10.6173	High confidence
Alisertib	4 cell line mix	Kinobeads	ABL2	1	1.05119	1.15232	0.848785	0.932931	0.895405	0.763121	0.523758	0.237837	151790000	Normalized LFQ intensity	0.692598	0.0687197	1.03314	3044.37	3044.37	4158.77	0.331378	1008.83	0.930164	-11.1435	High confidence
Alisertib	4 cell line mix	Kinobeads	ACAD10	1	1.19274	1.22516	0.724557	0.604641	0	0	0	0	10054000	Normalized LFQ intensity	1.44169	-0.0289022	1.12396	81.6526	81.6526	32.5161	0.958432	78.2584	0.950619	-2.78509	High confidence
Alisertib	4 cell line mix	Kinobeads	AURKA	1	1.07999	0.775074	0.162648	0.020501	0	0.0136246	0	0	110330000	Normalized LFQ intensity	2.6008	0.00589288	1.0447	15.1908	15.1908	0.9361	0.353704	5.37303	0.997248	-31.2219	High confidence
Alisertib	4 cell line mix	Kinobeads	AURKB	1	6.98979	7.29574	6.26695	4.8697	3.10715	0	0	0	1975600	Normalized LFQ intensity	2.96348	-0.0334044	5.32119	332.899	332.899	222.244	0.585272	194.836	0.665363	46.2065	High confidence
Alisertib	4 cell line mix	Kinobeads	CSNK2A1;CSNK2A3	1	1.01503	1.03619	1.0594	1.16569	1.2133	0.952011	0.776503	0.313444	108740000	Normalized LFQ intensity	1.72051	0.292798	1.07611	3833.75	3833.75	1631.89	1.01946	3833.75	0.923393	-11.315	High confidence
Alisertib	4 cell line mix	Kinobeads	CSNK2A2	1	0.897355	1.08747	0.932178	1.14576	1.15314	0.874306	0.796974	0.251231	160750000	Normalized LFQ intensity	1.37164	0.171955	1.02811	5749.45	5749.45	6278.38	0.962701	5535	0.880919	-6.95696	High confidence
Alisertib	4 cell line mix	Kinobeads	CSNK2B	1	0.945566	0.995169	0.942416	0.892946	1.04086	0.777767	0.755602	0.297052	128760000	Normalized LFQ intensity	0.730907	-0.175178	0.976336	18333.9	18333.9	78228.9	1.08129	18333.9	0.937447	-16.014	High confidence
Alisertib	4 cell line mix	Kinobeads	DNAJA1	1	0.838995	0.794147	1.11844	0.956539	0.908129	0.71	0.675759	0.542577	5049800	Normalized LFQ intensity	1.5187	0.5675	0.944851	961.76	961.76	1220.8	1.01532	961.76	0.712488	-6.73787	High confidence
Alisertib	4 cell line mix	Kinobeads	EIF3J	1	1.085	1.32278	1.15466	1.17625	1.25873	1.31287	0.842873	0.401688	41265000	Normalized LFQ intensity	7.07267	0.401661	1.18719	3107.45	3107.45	469.513	1.10588	3107.45	0.873436	-5.32617	High confidence
Alisertib	4 cell line mix	Kinobeads	EPHA2	1	1.06939	1.11233	0.941379	1.03385	0.75701	0.547621	0.393865	0.192226	96005000	Normalized LFQ intensity	0.97373	0.183105	1.05578	749.434	749.434	286.103	0.412958	309.485	0.971678	-16.4542	High confidence
Alisertib	4 cell line mix	Kinobeads	EPHA4	1	1.09967	1.12738	0.905103	1.02455	0.816747	0.549958	0.463419	0.25496	20469000	Normalized LFQ intensity	0.957333	0.248596	1.05954	737.499	737.499	367.471	0.616594	454.738	0.954128	-13.3209	High confidence
Alisertib	4 cell line mix	Kinobeads	EPHB4	1	1.05403	1.08263	0.96124	1.0878	0.937567	0.896001	0.697564	0.463659	74122000	Normalized LFQ intensity	1.11933	0.426455	1.03486	2556.15	2556.15	1191.25	0.494832	1264.86	0.952398	-20.4096	High confidence
Alisertib	4 cell line mix	Kinobeads	GNAI2	1	0.565266	0.5284	0.694746	0.711948	0	0	0	0	3543400	Normalized LFQ intensity	12.7248	-0.00431256	0.700112	200.889	200.889	1011.66	0.916198	184.054	0.88766	-1.08372	Low confidence
Alisertib	4 cell line mix	Kinobeads	GRB2	1	0.923279	0.983783	1.1228	1.01471	1.61617	0.877817	0.77364	0.218157	26634000	Normalized LFQ intensity	1.81009	0.199181	1.0912	3914.1	3914.1	3841.62	0.623754	2441.44	0.657988	7.56958	High confidence
Alisertib	4 cell line mix	Kinobeads	HCK	1	1.00988	1.05692	0.87209	0.960713	0.920276	0.828506	0.749831	0.345087	394210000	Normalized LFQ intensity	0.577002	-0.310162	0.99958	30853.8	30853.8	70773.4	0.518348	15993	0.955318	-20.0966	High confidence
Alisertib	4 cell line mix	Kinobeads	MCM4	1	1.03009	1.02576	1.03504	0.887055	1.14589	0	0	0	4804500	Normalized LFQ intensity	12.431	-0.00132836	1.02065	628.537	628.537	838.298	1.29072	628.537	0.983796	-13.5975	Low confidence
Alisertib	4 cell line mix	Kinobeads	NDUFA13	1	0.767064	0.778005	0.853534	0.659256	0.881858	0.704612	0.513492	0	3643700	Normalized LFQ intensity	1.62007	-0.00035536	0.821642	3920.41	3920.41	2093.55	1.10949	3920.41	0.895712	-7.04522	Low confidence
Alisertib	4 cell line mix	Kinobeads	PDPK1;PDPK2P	1	0.832908	0.943323	1.05621	0.82341	0.664463	0.56727	0.349481	0.463582	9372400	Normalized LFQ intensity	1.42217	0.421723	0.955643	289.469	289.469	166.259	1.04203	289.469	0.902629	-10.6534	High confidence
Alisertib	4 cell line mix	Kinobeads	PLK4	1	0.864879	1.1694	0.857321	1.04453	1.02903	0.790524	0.67123	0.411675	5249200	Normalized LFQ intensity	1.3194	0.397796	0.996199	2312.55	2312.55	1877.64	0.509269	1177.71	0.812663	-6.16437	High confidence
Alisertib	4 cell line mix	Kinobeads	PSMA7	1	0.733119	0.840101	1.02317	0.907837	0.787758	0	0	0	5438600	Normalized LFQ intensity	6.46702	-0.00122465	0.900802	405.232	405.232	614.599	1.21239	405.232	0.965085	-9.08211	Low confidence
Alisertib	4 cell line mix	Kinobeads	PTK2	1	1.0541	1.16041	0.94196	1.06861	1.00682	1.04172	0.820725	0.354226	655710000	Normalized LFQ intensity	3.72282	0.353852	1.0398	3679.12	3679.12	2020.63	0.408006	1501.1	0.938589	-15.4684	High confidence
Alisertib	4 cell line mix	Kinobeads	RAB10	1	0.866735	0.738445	0.754499	0.726693	0.760147	0.475384	0.336333	0.307	6454200	Normalized LFQ intensity	0.329471	0.0135403	0.980793	1347.99	1347.99	4493.47	1.59724	1347.99	0.905642	-11.6549	Low confidence
Alisertib	4 cell line mix	Kinobeads	TNK1	1	1.02998	0.993359	0.853506	0.951971	0.842004	0.731412	0.505944	0.223606	24685000	Normalized LFQ intensity	0.717923	0.0732661	0.993235	2936.45	2936.45	2536.06	0.432597	1270.3	0.97234	-20.4266	High confidence
Alvocidib	4 cell line mix	Kinobeads	ADK	1	0.672837	0.562306	0.723688	0.600227	0.697724	0.672239	0.2386	0	668230	Normalized Intensity	3.21845	-0.00412734	0.709697	2441.46	2441.46	1010.67	1.12458	2441.46	0.824374	-2.35499	Low confidence
Alvocidib	4 cell line mix	Kinobeads	AFF1	1	0.512519	0.144358	0	0.0311464	0	0	0.0568785	0	673400	Normalized Intensity	1.66942	0.012162	0.999563	3.06601	3.06601	0.235957	0.926593	2.84094	0.995802	-32.9729	Low confidence
Alvocidib	4 cell line mix	Kinobeads	AFF4	1	0.315347	0.424289	0.0252502	0	0	0.0386614	0	0	4286700	Normalized Intensity	0.59584	-0.0212255	0.996607	1.58706	1.58706	1.48656	1.00904	1.58706	0.935986	-8.7346	High confidence
Alvocidib	4 cell line mix	Kinobeads	AZI2	1	1.16256	0.992557	1.5803	1.32198	0.948993	0.925231	0.756513	0.170288	21403000	Normalized LFQ intensity	0.918125	-0.0140725	1.19001	4844.49	4844.49	9666.87	0.701841	3400.06	0.763083	5.58548	High confidence
Alvocidib	4 cell line mix	Kinobeads	C2CD5	1	1.13951	0.923833	1.23505	0.960375	0.873391	0.722046	0.550846	0.246641	121980000	Normalized LFQ intensity	0.820546	0.170931	1.07158	1818.52	1818.52	1698.21	0.545264	991.574	0.9073	-7.33111	High confidence
Alvocidib	4 cell line mix	Kinobeads	CAB39	1	1.3656	1.37596	1.22213	0.963094	0.89091	1.02891	0.716969	0	3850600	Normalized LFQ intensity	1.13649	-0.00235192	1.16409	3965.14	3965.14	3100.62	1.12309	3965.14	0.847013	2.86683	Low confidence
Alvocidib	4 cell line mix	Kinobeads	CABLES1	1	0.963324	0.71838	0.961229	0.856961	0.700516	0.564175	0.713265	0.343103	9218200	Normalized LFQ intensity	0.318263	-0.115297	0.986819	15893.5	15893.5	69639	0.549533	8734.03	0.790529	-6.3038	High confidence
Alvocidib	4 cell line mix	Kinobeads	CAMK4	1	1.23246	1.34238	1.50453	1.32221	1.0466	1.02221	0.949553	0	2330500	Normalized LFQ intensity	1.49575	-0.00829809	1.23423	5459.69	5459.69	3756.06	1.01957	5459.69	0.864867	2.47868	High confidence
Alvocidib	4 cell line mix	Kinobeads	CAMKK2	1	1.12802	0.941401	1.06993	1.01649	0.808563	0.724895	0.477454	0.162534	80866000	Normalized LFQ intensity	0.808879	0.0613058	1.04769	2075.63	2075.63	1241.66	0.664348	1378.94	0.964034	-15.1652	High confidence
Alvocidib	4 cell line mix	Kinobeads	CCNA2	1	1.31387	1.05071	1.26375	0.897652	0.826194	0.795449	0.709781	0.270618	42325000	Normalized LFQ intensity	0.512542	-0.0798149	1.15325	5683.52	5683.52	19591.4	0.86194	4898.86	0.838006	-1.80938	High confidence
Alvocidib	4 cell line mix	Kinobeads	CCNB1	1	1.15567	1.08684	1.06238	0.848303	0.577914	0.466538	0.252271	0.0784597	79063000	Normalized LFQ intensity	0.839958	0.0762519	1.10663	405.532	405.532	170.195	0.766242	310.736	0.97538	-14.5704	High confidence
Alvocidib	4 cell line mix	Kinobeads	CCNB2	1	1.21407	0.980458	1.2631	0.721696	0.737627	0.394116	0.28059	0.0417541	27949000	Normalized LFQ intensity	0.845824	0.0356947	1.11835	495.572	495.572	400.172	0.701269	347.53	0.910621	-1.68571	High confidence
Alvocidib	4 cell line mix	Kinobeads	CCNH	1	1.08551	1.01868	1.29573	1.02113	0.786532	0.692225	0.333305	0	41816000	Normalized LFQ intensity	1.02338	-0.00128875	1.0913	1367.25	1367.25	703.412	0.758128	1036.55	0.938372	-5.73783	High confidence
Alvocidib	4 cell line mix	Kinobeads	CCNK	1	1.13228	0.728726	0.950894	0.844933	0.549206	0.409064	0.305513	0.0693712	38042000	Normalized LFQ intensity	0.623799	-0.000280467	1.02174	579.815	579.815	632.274	1.1145	579.815	0.914521	-5.27904	High confidence
Alvocidib	4 cell line mix	Kinobeads	CCNT1	1	0.640017	0.326566	0.110817	0.0346061	0.0287399	0	0	0	61042000	Normalized LFQ intensity	1.12265	0.00219152	0.999404	5.05865	5.05865	0.178766	0.983173	4.97353	0.999523	-51.8948	High confidence
Alvocidib	4 cell line mix	Kinobeads	CCNT2	1	0.825733	0	0	0	0	0	0	0	5086500	Normalized LFQ intensity	6.35805	0.00266692	1.00015	3.82827	3.82827	0.0581275	0.880012	3.36892	0.999949	-69.7923	High confidence
Alvocidib	4 cell line mix	Kinobeads	CDC42BPA	1	1.25505	1.1175	1.22648	0.752532	0.655305	0.64882	0.775038	0.0157073	59703000	Normalized LFQ intensity	0.43376	-0.686096	1.14016	14596.6	14596.6	58452.4	0.960473	14019.6	0.799853	3.79978	High confidence
Alvocidib	4 cell line mix	Kinobeads	CDC42BPB	1	1.10111	0.977069	1.26845	0.643804	0.945804	0.92153	0.762969	0.204648	127550000	Normalized LFQ intensity	0.608657	-0.91653	1.02831	51455.8	51455.8	258125	0.9718	50004.7	0.73831	2.14832	High confidence
Alvocidib	4 cell line mix	Kinobeads	CDK1	1	1.01416	0.9739	1.11953	1.00367	0.778887	0.747871	0.490447	0.176348	474740000	Normalized LFQ intensity	0.82555	0.0786043	1.03169	2209.39	2209.39	1355.2	0.685984	1515.6	0.960145	-14.8831	High confidence
Alvocidib	4 cell line mix	Kinobeads	CDK12	1	1.16628	0.968827	1.0295	0.785757	0.621177	0.515857	0.305384	0.463197	221750000	Normalized LFQ intensity	1.19725	0.39928	1.06403	156.601	156.601	74.0892	1.11983	156.601	0.93894	-11.4532	High confidence
Alvocidib	4 cell line mix	Kinobeads	CDK13	1	1.36082	1.03349	1.33368	1.31574	0.929975	0.75347	0.708636	0.281596	9107700	Normalized LFQ intensity	0.879008	0.230515	1.2054	1813.74	1813.74	2460.9	1.24846	1813.74	0.819955	1.32236	High confidence
Alvocidib	4 cell line mix	Kinobeads	CDK16	1	1.58024	1.18989	1.64163	1.48146	0.963232	0.665703	0.492296	0	7438000	Normalized LFQ intensity	1.04627	-0.00162365	1.37769	1158.24	1158.24	1173.91	0.942646	1091.81	0.837917	8.20582	High confidence
Alvocidib	4 cell line mix	Kinobeads	CDK17	1	1.29727	0	0	0	0	0	0	0	3148200	Normalized LFQ intensity	12.176	-0.00118811	1.14867	6.45462	6.45462	6.41182	1.02071	6.45462	0.978898	-11.3109	High confidence
Alvocidib	4 cell line mix	Kinobeads	CDK2	1	1.08277	1.00761	1.38663	1.16237	0.870051	0.8529	0.661725	0.296878	441530000	Normalized LFQ intensity	0.915171	0.221523	1.11879	2510.69	2510.69	3005.49	0.532482	1336.9	0.828121	-1.34605	High confidence
Alvocidib	4 cell line mix	Kinobeads	CDK5	1	0.990257	0.976136	1.13196	0.742988	0.399343	0.229623	0.0960331	0.0241051	834570000	Normalized LFQ intensity	1.50306	0.0768968	1.02998	203.821	203.821	56.1932	0.523615	106.723	0.974951	-12.6839	High confidence
Alvocidib	4 cell line mix	Kinobeads	CDK6	1	0.980401	1.12109	1.18828	1.23463	1.06798	1.0155	0.814344	0.389393	31001000	Normalized LFQ intensity	1.58004	0.360917	1.1001	3975.59	3975.59	2427.79	0.819855	3259.41	0.899156	-9.88928	High confidence
Alvocidib	4 cell line mix	Kinobeads	CDK7	1	1.15214	1.02465	1.25598	1.05724	0.754838	0.54468	0.315153	0.0139507	88263000	Normalized LFQ intensity	0.993947	0.00856475	1.11659	930.053	930.053	459.406	0.725457	674.713	0.953642	-7.81073	High confidence
Alvocidib	4 cell line mix	Kinobeads	CDK9	1	0.777	0.444297	0.297206	0.0596616	0.0428081	0.0190281	0.00722164	0.00599175	200450000	Normalized LFQ intensity	0.978524	0.00476999	1.00449	9.30585	9.30585	1.28181	0.711499	6.6211	0.9945	-29.1104	High confidence
Alvocidib	4 cell line mix	Kinobeads	CIT	1	0.644734	0.779753	1.08777	0.309412	0.445777	0.486526	0.145683	0.00706337	198120000	Normalized LFQ intensity	0.397943	-0.205674	0.955382	738.021	738.021	3380.06	1.21394	738.021	0.725704	5.83826	High confidence
Alvocidib	4 cell line mix	Kinobeads	CSNK2A1;CSNK2A3	1	1.03632	1.04608	1.20861	1.06271	0.84855	1.01629	0.625346	0.178312	127300000	Normalized LFQ intensity	2.77681	0.176559	1.03633	3103.99	3103.99	748.643	1.01946	3103.99	0.914721	-7.6015	High confidence
Alvocidib	4 cell line mix	Kinobeads	CSNK2A2	1	1.12173	0.902532	1.17804	1.19905	0.916019	0.963149	0.776886	0.27989	227390000	Normalized LFQ intensity	1.01754	0.105898	1.06526	6836.92	6836.92	13713.2	0.962701	6581.91	0.869687	-5.83873	High confidence
Alvocidib	4 cell line mix	Kinobeads	CSNK2B	1	0.991886	1.02918	1.06458	1.06568	0.835793	1.08069	0.748868	0.289077	57518000	Normalized LFQ intensity	5.62307	0.288957	1.00976	3319.75	3319.75	751.306	1.08129	3319.75	0.918966	-11.7061	Low confidence
Alvocidib	4 cell line mix	Kinobeads	DCAF7	1	0.680173	0.953614	1.03342	0.899469	0.988381	0.735359	0.540748	0.277237	8316500	Normalized LFQ intensity	1.5637	0.271159	0.926182	2218.75	2218.75	1389.57	0.89643	1988.95	0.828934	-4.99769	High confidence
Alvocidib	4 cell line mix	Kinobeads	DYRK1A	1	0.897359	0.927172	1.10632	1.13197	0.693322	0.611001	0.463148	0.22098	13780000	Normalized LFQ intensity	1.06927	0.228933	1.00693	975.289	975.289	812.592	0.933007	909.951	0.881955	-4.91195	High confidence
Alvocidib	4 cell line mix	Kinobeads	EIF2AK1	1	0.351421	0.593309	0.829654	0.375701	0.312824	0	0.0276738	0	3084900	Normalized Intensity	0.352925	-0.119956	0.937283	63.1125	63.1125	171.05	0.921519	58.1594	0.748225	4.77658	Low confidence
Alvocidib	4 cell line mix	Kinobeads	EIF3J	1	1.32649	1.08297	1.18783	1.02692	0.988918	0.937121	0.966586	0.299719	54658000	Normalized LFQ intensity	0.935208	-0.013295	1.11311	11697.9	11697.9	15975.7	1.10588	11697.9	0.852677	-4.48208	High confidence
Alvocidib	4 cell line mix	Kinobeads	ERCC2	1	1.05374	0.952388	1.16769	1.02045	0.747191	0.509954	0.321436	0	54444000	Normalized LFQ intensity	0.995043	-0.00102173	1.05512	1018.36	1018.36	439.332	0.904725	921.34	0.96413	-11.2116	High confidence
Alvocidib	4 cell line mix	Kinobeads	FIBP	1	1.1224	0.967227	1.29408	1.09336	0.742274	0.691346	0.554126	0.280588	59179000	Normalized LFQ intensity	0.903458	0.273301	1.10288	975.107	975.107	1040.67	0.570275	556.079	0.864261	-3.06879	High confidence
Alvocidib	4 cell line mix	Kinobeads	GSK3A	1	1.22291	1.0008	1.2847	1.18737	1.04299	0.840185	0.54272	0.20538	360330000	Normalized LFQ intensity	1.30917	0.184155	1.13873	1941.18	1941.18	881.937	0.500216	971.011	0.925669	-6.79123	High confidence
Alvocidib	4 cell line mix	Kinobeads	GSK3B	1	1.1386	0.989122	1.41827	1.23917	0.898286	0.754836	0.499431	0.150884	365590000	Normalized LFQ intensity	1.10588	0.125546	1.14939	1591.42	1591.42	1223.18	0.464999	740.01	0.868142	0.167618	High confidence
Alvocidib	4 cell line mix	Kinobeads	GSKIP	1	1.15463	1.31253	1.45701	1.2828	1.40283	0.902877	0.344844	0	2286800	Normalized Intensity	2.02103	-0.00144978	1.26848	1743.57	1743.57	619.78	0.837391	1460.05	0.922611	0.000995662	High confidence
Alvocidib	4 cell line mix	Kinobeads	KLHL6	1	1.05946	1.46948	0.967337	1.21849	1.11534	0.955666	0.814866	0.232005	8474400	Normalized Intensity	1.05814	0.0737294	1.1446	5869.41	5869.41	10766.2	0.740829	4348.23	0.807311	1.07325	Low confidence
Alvocidib	4 cell line mix	Kinobeads	MNAT1	1	1.09256	0.791741	1.3153	0.798897	0.733153	0.58444	0.285889	0.0888269	30354000	Normalized LFQ intensity	0.877857	0.0414039	1.03695	954.028	954.028	961.89	0.878192	837.82	0.847334	1.35195	High confidence
Alvocidib	4 cell line mix	Kinobeads	PIP4K2C	1	1.01505	1.00271	1.04459	1.16024	0.77999	1.06275	0.737392	0.395674	7052500	Normalized LFQ intensity	5.23615	0.395485	1.00949	3136.56	3136.56	666.835	0.907123	2845.24	0.819878	-6.00234	Low confidence
Alvocidib	4 cell line mix	Kinobeads	PKN1	1	1.06627	0.963381	1.21585	1.04182	0.885533	0.898288	0.774618	0.368372	71720000	Normalized LFQ intensity	0.69257	0.0291524	1.0562	10981	10981	32639.7	0.874092	9598.45	0.888601	-10.015	High confidence
Alvocidib	4 cell line mix	Kinobeads	PRKCD	1	1.06242	1.03293	1.04998	1.11579	0.73616	0.657849	0.519201	0.167625	19764000	Normalized LFQ intensity	0.78419	0.0913401	1.06251	1681.41	1681.41	1306.86	0.947106	1592.47	0.944104	-10.9255	High confidence
Alvocidib	4 cell line mix	Kinobeads	PRKD2	1	0.864845	0.822153	1.10773	0.926669	0.854329	0.655348	0.354137	0.0166398	55279000	Normalized LFQ intensity	1.24027	-0.0138162	0.947854	1997.14	1997.14	816.709	0.659146	1316.41	0.944891	-9.77666	High confidence
Alvocidib	4 cell line mix	Kinobeads	PRKD3	1	1.25959	1.10573	1.44954	1.23873	0.982272	0.643478	0.310998	0	17953000	Normalized LFQ intensity	1.2847	-0.00143435	1.2137	1157.29	1157.29	551.1	0.740225	856.652	0.928883	-1.61719	High confidence
Alvocidib	4 cell line mix	Kinobeads	PYGB	1	0.791486	0.754851	0.955413	0.88918	1.09055	0.781776	0.532935	0	6816500	Normalized LFQ intensity	1.89161	-0.00682485	0.907893	3568.82	3568.82	1507.76	1.07339	3568.82	0.897645	-5.20144	High confidence
Alvocidib	4 cell line mix	Kinobeads	PYGL	1	1.14429	0.910832	1.08569	0.969845	0.902009	0.708777	0.479509	0.144703	201650000	Normalized LFQ intensity	0.912551	0.0657642	1.0394	2121	2121	1136.63	1.08227	2121	0.961036	-14.1335	High confidence
Alvocidib	4 cell line mix	Kinobeads	RPS6KA1	1	1.07633	0.890998	1.19913	1.00812	0.845253	0.786002	0.730955	0.440047	609900000	Normalized LFQ intensity	0.676999	0.320837	1.04405	3111.06	3111.06	6739.99	0.751989	2339.48	0.83305	-7.67793	Low confidence
Alvocidib	4 cell line mix	Kinobeads	TANK	1	1.11485	0.947101	1.32168	1.0438	1.02746	0.96865	0.783383	0.363696	80117000	Normalized LFQ intensity	1.19422	0.295204	1.08391	4348.48	4348.48	4798.56	0.63618	2766.42	0.845257	-5.3501	High confidence
Alvocidib	4 cell line mix	Kinobeads	TAOK1	1	1.36483	1.50846	1.54508	1.32618	1.22004	1.30644	1.07959	0.430656	6040400	Normalized LFQ intensity	2.00083	0.407155	1.33039	4895.55	4895.55	17000.4	0.664809	3254.61	0.781763	2.25689	Low confidence
Alvocidib	4 cell line mix	Kinobeads	TAOK3	1	1.21323	1.11715	1.35284	1.23587	1.01669	1.01556	0.921776	0.538296	81703000	Normalized LFQ intensity	0.888621	0.404009	1.17124	5570.79	5570.79	9876.44	0.773652	4309.85	0.799137	-5.0764	Low confidence
Alvocidib	4 cell line mix	Kinobeads	TBK1	1	1.04977	0.858786	1.19491	1.09193	0.8978	0.785859	0.637357	0.263855	688740000	Normalized LFQ intensity	0.947802	0.180877	1.03625	3047.99	3047.99	3101.21	0.639531	1949.28	0.885607	-6.8727	High confidence
Alvocidib	4 cell line mix	Kinobeads	TBKBP1	1	1.20198	1.10463	1.38228	1.13367	1.18523	1.03268	0.82037	0	4998200	Normalized LFQ intensity	1.77666	-0.00137336	1.16248	4682.86	4682.86	2231	0.793595	3716.3	0.932097	-5.22456	High confidence
Alvocidib	4 cell line mix	Kinobeads	TYK2	1	1.04123	0.915756	1.18011	0.989569	0.936751	0.883967	0.782293	0.469019	39695000	Normalized LFQ intensity	0.773308	0.296385	1.02858	6652.08	6652.08	15572.7	0.521407	3468.44	0.872529	-12.1321	High confidence
AMG-208	4 cell line mix	Kinobeads	FAM83B	1	1.07875	0	0	0	0	0	0	0	5584700	Normalized LFQ intensity	12.5995	-0.000545099	1.03943	6.16264	6.16264	3.30877	1.05785	6.16264	0.99815	-35.1922	Low confidence
AMG-208	4 cell line mix	Kinobeads	FLNB	1	1.33784	1.37847	1.14088	1.18609	0.566035	0.394543	0.200737	0.355415	2373000	Normalized Intensity	3.58574	0.314329	1.21698	231.635	231.635	77.0606	0.961019	222.606	0.932613	-2.79767	Low confidence
AMG-208	4 cell line mix	Kinobeads	MET	1	0.80389	0.850951	0.575933	0	0	0	0	0	6934300	Normalized LFQ intensity	3.96257	-0.00105226	0.887423	34.9723	34.9723	6.04781	0.803492	28.0999	0.986562	-18.1357	High confidence
AMG-208	4 cell line mix	Kinobeads	PRKACG	1	0.817593	0	0	0	0	0	0	0	9811200	Normalized LFQ intensity	6.69336	0.00155717	0.999913	3.75256	3.75256	0.031784	0.513401	1.92657	0.999982	-79.2226	Low confidence
AMG-900	4 cell line mix	Kinobeads	ABL1	1	1.10781	1.13842	1.20176	1.12143	1.08528	NA	0.895086	0.563917	30965000	Normalized LFQ intensity	3.03247	0.563165	1.10919	3465.67	3465.67	NA	0.547922	1898.92	0.924745	-14.0491	High confidence
AMG-900	4 cell line mix	Kinobeads	AURKA	1	0.788425	0.738218	0.355773	0.152258	0.0999884	NA	0	0.105497	12517000	Normalized LFQ intensity	1.17974	0.0512209	0.962583	18.8469	18.8469	5.14171	0.353704	6.66621	0.980902	-15.0019	High confidence
AMG-900	4 cell line mix	Kinobeads	AURKB	1	0.989632	1.20053	0.823846	0	0	NA	0	0	1721700	Normalized LFQ intensity	9.93704	0.000177203	1.06341	33.9705	33.9705	39.5041	0.585272	19.882	0.986444	-12.0633	High confidence
AMG-900	4 cell line mix	Kinobeads	BCR	1	1.41901	1.28211	1.20364	0.988878	1.03663	NA	0.768241	0.351011	7800500	Normalized LFQ intensity	0.632049	0.123282	1.21841	4119.27	4119.27	9302.92	0.477847	1968.38	0.842916	-0.4062	High confidence
AMG-900	4 cell line mix	Kinobeads	BRAF	1	1.09187	1.1107	1.11078	1.11769	1.19237	NA	0.671601	0.466691	9417500	Normalized LFQ intensity	3.92569	0.466559	1.10391	2481.88	2481.88	1006.86	1.11087	2481.88	0.95932	-15.2088	High confidence
AMG-900	4 cell line mix	Kinobeads	CAMK4	1	1.30018	1.1552	1.16641	1.18975	1.29689	NA	0.699406	0.644741	2876700	Normalized LFQ intensity	4.35817	0.64482	1.18477	1817.49	1817.49	2600.58	1.01957	1817.49	0.865833	-5.86924	High confidence
AMG-900	4 cell line mix	Kinobeads	CDK12	1	1.18065	1.04409	1.22316	1.06493	1.12681	NA	0.814095	0.529191	52695000	Normalized LFQ intensity	3.05427	0.528609	1.10668	2977.4	2977.4	736.029	1.11983	2977.4	0.898839	-10.0177	Low confidence
AMG-900	4 cell line mix	Kinobeads	CDK13	1	1.29839	1.12136	1.49374	1.0054	1.18212	NA	0.799788	0.485955	3453900	Normalized LFQ intensity	1.26347	0.463094	1.19467	2506.52	2506.52	2885.44	1.24846	2506.52	0.733261	2.64558	Low confidence
AMG-900	4 cell line mix	Kinobeads	CERS2	1	1.4425	1.24326	1.35618	1.30537	1.2324	NA	0.678593	0.338101	3280200	Normalized LFQ intensity	1.81583	0.32951	1.26786	2248.21	2248.21	1431.3	1.13643	2248.21	0.890333	-1.01192	High confidence
AMG-900	4 cell line mix	Kinobeads	CLK1	1	1.21139	1.13767	1.03446	1.00862	0.951877	NA	0.778301	0.437993	5258300	Normalized LFQ intensity	0.670251	0.311779	1.1038	3435.12	3435.12	3754.86	0.715477	2457.75	0.920693	-10.9815	High confidence
AMG-900	4 cell line mix	Kinobeads	CLK2	1	1.2973	1.13817	1.00991	0.950722	0.958268	NA	0.831647	0	2240400	Normalized LFQ intensity	2.55599	-0.00252208	1.05934	4975.32	4975.32	NA	0.646848	3218.27	0.914202	-2.73583	High confidence
AMG-900	4 cell line mix	Kinobeads	CLK3	1	1.23686	0.920659	0.888846	0.870927	1.01803	NA	0.688703	0.617853	1631000	Normalized LFQ intensity	0.493973	0.507097	1.05377	1479.31	1479.31	6256.54	1.02868	1479.31	0.664209	-2.95515	High confidence
AMG-900	4 cell line mix	Kinobeads	CSNK2B	1	1.08209	1.24527	1.23024	1.13774	1.19206	NA	0.804591	0.681121	36065000	Normalized LFQ intensity	4.07438	0.681064	1.14791	2334.73	2334.73	3084.45	1.08129	2334.73	0.850691	-8.42828	High confidence
AMG-900	4 cell line mix	Kinobeads	DDR1	1	1.0037	1.13091	1.03377	0.66233	0.377105	NA	0	0	3598700	Normalized LFQ intensity	1.39046	-0.00422586	1.05932	175.909	175.909	38.3802	0.627266	110.342	0.984668	-13.4736	High confidence
AMG-900	4 cell line mix	Kinobeads	DDR2	1	1.4857	1.21	1.18615	1.068	0.803964	NA	0.189423	0.17327	16725000	Normalized LFQ intensity	1.41209	0.153851	1.2263	391.121	391.121	226.582	0.762065	298.06	0.924542	-0.445415	High confidence
AMG-900	4 cell line mix	Kinobeads	DKC1	1	0.884464	0.798863	1.01519	0.868216	0.936962	NA	0.579927	0.416118	4469200	Normalized LFQ intensity	4.15966	0.416025	0.917222	2524.07	2524.07	3125.98	1.48149	2524.07	0.889771	-10.51	Low confidence
AMG-900	4 cell line mix	Kinobeads	FAM83B	1	1.25265	1.17344	1.24541	1.17019	1.12931	NA	0.798301	0.48563	2870800	Normalized LFQ intensity	1.434	0.464134	1.1679	2773.96	2773.96	1431.52	1.05785	2773.96	0.915938	-8.93884	High confidence
AMG-900	4 cell line mix	Kinobeads	FES	1	1.07132	1.19347	1.13291	1.09305	0.849724	NA	0.47155	0.429493	16460000	Normalized LFQ intensity	3.36986	0.450473	1.10008	344.543	344.543	108.869	0.369564	127.33	0.965512	-14.242	High confidence
AMG-900	4 cell line mix	Kinobeads	GAPVD1	1	1.4512	1.0753	1.09014	1.02028	1.16295	NA	0.758872	0.514496	4634700	Normalized LFQ intensity	3.4652	0.514635	1.13339	2649.6	2649.6	3062.28	0.994854	2635.97	0.743779	0.604702	Low confidence
AMG-900	4 cell line mix	Kinobeads	GRAMD1A	1	1.41936	1.13577	1.15189	1.19784	1.12771	NA	0.817632	0.416868	4923800	Normalized LFQ intensity	1.21387	0.364843	1.18178	3469.31	3469.31	3466.02	0.851756	2955.01	0.853461	-2.50433	High confidence
AMG-900	4 cell line mix	Kinobeads	INPPL1	1	1.25695	1.14356	1.01286	1.09401	0.996996	NA	0.607531	0	1300300	Normalized LFQ intensity	1.41291	-0.00285905	1.09259	3390.66	3390.66	1318.13	0.483409	1639.08	0.956154	-7.42626	High confidence
AMG-900	4 cell line mix	Kinobeads	IPO7	1	1.78326	1.21893	1.35898	1.39308	1.22834	NA	0.741391	0.446407	4068700	Normalized LFQ intensity	1.24894	0.427244	1.35284	1689.59	1689.59	2397.33	1.22084	1689.59	0.722185	7.67059	High confidence
AMG-900	4 cell line mix	Kinobeads	MAP2K1	1	0.87225	1.00705	1.05558	0.944521	1.0132	NA	0.774344	0.449786	3592900	Normalized LFQ intensity	4.48488	0.449758	0.982102	3313.83	3313.83	3985.85	1.23132	3313.83	0.925445	-14.5217	High confidence
AMG-900	4 cell line mix	Kinobeads	MAP2K2	1	0.969978	1.14289	1.26425	1.09396	1.14515	NA	0.831976	0.396509	11797000	Normalized LFQ intensity	3.17322	0.395696	1.10273	3487.65	3487.65	2692.04	1.17379	3487.65	0.88681	-6.34429	High confidence
AMG-900	4 cell line mix	Kinobeads	MAP3K2	1	1.19025	1.16056	1.05153	1.13793	1.12771	NA	0.756388	0.469403	11705000	Normalized LFQ intensity	3.30991	0.469078	1.11139	2814.98	2814.98	834.907	0.698286	1965.66	0.941717	-12.8529	High confidence
AMG-900	4 cell line mix	Kinobeads	MAP3K3	1	1.6181	1.65345	1.4061	1.4746	1.25691	NA	1.03331	0.467922	1651600	Normalized LFQ intensity	1.06265	0.371369	1.42229	4092.99	4092.99	5796.36	0.67104	2746.56	0.734686	6.56305	High confidence
AMG-900	4 cell line mix	Kinobeads	MAP3K5	1	1.1859	0.989421	1.15047	1.06047	1.06144	NA	0.844927	0.462453	6734000	Normalized LFQ intensity	3.38574	0.462055	1.07465	3488.1	3488.1	NA	0.800358	2791.73	0.915372	-11.2398	High confidence
AMG-900	4 cell line mix	Kinobeads	MAP4K2	1	0.911895	1.08234	0.974129	0.845652	0.519552	NA	0	0	4371500	Normalized LFQ intensity	1.60868	-0.0116902	0.996547	315.499	315.499	55.5617	0.590017	186.15	0.988638	-16.7721	High confidence
AMG-900	4 cell line mix	Kinobeads	MAP4K5	1	1.05285	1.17714	1.11804	1.0316	0.970988	NA	0.732524	0.493145	36156000	Normalized LFQ intensity	0.88647	0.436565	1.0845	2297.59	2297.59	1870.53	0.744124	1709.69	0.942007	-14.5786	High confidence
AMG-900	4 cell line mix	Kinobeads	MAPK14	1	0.950076	1.11671	1.07489	1.03168	0.914369	NA	0.537778	0.333943	200820000	Normalized LFQ intensity	1.16487	0.316476	1.03889	1435.03	1435.03	695.73	0.512104	734.884	0.965884	-15.3129	High confidence
AMG-900	4 cell line mix	Kinobeads	MAPKAPK2	1	1.00065	1.39744	1.1925	1.01176	0.971958	NA	0.659975	0	2604300	Normalized LFQ intensity	1.29385	-0.00420186	1.1077	3716.39	3716.39	2524.21	0.7227	2685.84	0.88981	0.530039	High confidence
AMG-900	4 cell line mix	Kinobeads	MFAP1	1	1.08693	1.27413	1.15443	1.72574	1.42159	NA	0	0	347950	Normalized LFQ intensity	7.38703	-0.00170851	1.27715	1141.91	1141.91	27122.5	1.00753	1141.91	0.87479	8.07036	Low confidence
AMG-900	4 cell line mix	Kinobeads	NCL	1	0.995275	0.811236	0.943253	0.869684	0.837791	NA	0.710452	0.325151	147050000	Normalized LFQ intensity	0.52387	-0.307026	0.950022	33064.6	33064.6	77890.1	1.36459	33064.6	0.93152	-13.6748	Low confidence
AMG-900	4 cell line mix	Kinobeads	NEK1	1	1.2276	1.07587	1.29112	1.14613	1.15724	NA	0.817601	0.519339	4306100	Normalized LFQ intensity	2.70858	0.518395	1.14991	2884.15	2884.15	1013.91	0.825635	2381.26	0.87882	-6.88236	High confidence
AMG-900	4 cell line mix	Kinobeads	NQO2	1	0.959375	0.99054	1.15472	1.0163	1.12288	NA	0.821543	0.474675	37992000	Normalized LFQ intensity	4.08444	0.474846	1.0407	3352.77	3352.77	1985.4	1.06667	3352.77	0.903412	-11.2892	High confidence
AMG-900	4 cell line mix	Kinobeads	OSBPL3	1	1.40648	0.77397	1.20037	1.02175	1.1937	NA	0.475812	0.098848	5996800	Normalized LFQ intensity	3.89745	0.0985829	1.09943	2635.69	2635.69	2321.75	0.829353	2185.92	0.818401	4.88757	High confidence
AMG-900	4 cell line mix	Kinobeads	PAG1	1	0.938698	0.910208	0.959612	0.961856	0.871858	NA	0.630458	0.426831	3035600	Normalized LFQ intensity	0.968532	0.385247	0.95954	2185.25	2185.25	892.18	0.49264	1076.54	0.981209	-25.3724	High confidence
AMG-900	4 cell line mix	Kinobeads	PRKCD	1	1.34582	1.14651	1.17265	1.08252	1.10035	NA	0.731239	0.621852	4663600	Normalized LFQ intensity	1.30531	0.612912	1.15896	1152.67	1152.67	1252.97	0.947106	1091.71	0.838584	-5.49737	High confidence
AMG-900	4 cell line mix	Kinobeads	PRKD2	1	0.995935	1.09671	0.986006	0.940661	0.930615	NA	0.808146	0.608006	18676000	Normalized LFQ intensity	0.534762	0.397669	1.02574	8606.64	8606.64	23704.4	0.659146	5673.03	0.936552	-20.35	High confidence
AMG-900	4 cell line mix	Kinobeads	PRKD3	1	1.16858	1.09131	1.12452	0.972303	0.928724	NA	0.730622	0.477459	8747400	Normalized LFQ intensity	0.657053	0.360733	1.09763	2582.41	2582.41	3689.19	0.740225	1911.57	0.936931	-13.5618	High confidence
AMG-900	4 cell line mix	Kinobeads	PTCD3	1	1.04446	0.894803	0.886432	0.78907	0.884536	NA	0	0	1374800	Normalized LFQ intensity	3.20325	-0.0018171	0.924672	746.46	746.46	903.095	1.22229	746.46	0.968896	-9.187	Low confidence
AMG-900	4 cell line mix	Kinobeads	Q6ZSR9	1	1.48216	1.22983	1.44857	1.21008	1.13752	NA	1.01209	0.646994	10375000	Normalized LFQ intensity	0.865288	0.536886	1.27262	4670.21	4670.21	10347.6	0.761466	3556.21	0.677001	1.94264	High confidence
AMG-900	4 cell line mix	Kinobeads	RET	1	1.11282	1.24271	1.16775	1.11247	1.11507	NA	0.695154	0.376064	28974000	Normalized LFQ intensity	1.87674	0.36833	1.12761	2586.34	2586.34	905.787	0.440569	1139.46	0.947739	-11.1817	High confidence
AMG-900	4 cell line mix	Kinobeads	RPS6KA4	1	1.07527	1.19583	1.1622	1.07438	1.01388	NA	0.845283	0.602599	27575000	Normalized LFQ intensity	0.902357	0.537171	1.10357	3351.63	3351.63	3789	0.617388	2069.26	0.898509	-12.6823	High confidence
AMG-900	4 cell line mix	Kinobeads	RPS6KA5	1	1.11782	0.931474	1.02462	1.33463	1.25803	NA	0.852728	0.53866	3746800	Normalized LFQ intensity	3.42874	0.538075	1.11106	3182.79	3182.79	1575.27	0.676383	2152.79	0.713459	-0.251808	High confidence
AMG-900	4 cell line mix	Kinobeads	STK26	1	1.0464	0.74099	1.03827	0.797789	0.897873	NA	0.513283	0	927310	Normalized LFQ intensity	1.50065	-0.0125612	0.925751	3441.29	3441.29	2783.37	0.878316	3022.54	0.905486	-3.46587	High confidence
AMG-900	4 cell line mix	Kinobeads	TAOK1	1	1.75934	1.29006	1.55927	1.33559	1.55691	NA	0.869302	0.414396	3332200	Normalized LFQ intensity	3.67125	0.41418	1.4169	2852.69	2852.69	1347.95	0.664809	1896.5	0.739551	8.15046	High confidence
AMG-900	4 cell line mix	Kinobeads	TAOK3	1	1.34919	1.07218	1.14681	1.12077	1.16467	NA	0.737023	0.566239	16943000	Normalized LFQ intensity	3.16214	0.566018	1.14247	2282.66	2282.66	2649.35	0.773652	1765.98	0.844826	-4.92516	High confidence
AMG-900	4 cell line mix	Kinobeads	THRAP3	1	0.63598	0.701668	0.761366	1.03429	0.95859	NA	0.49389	0.256436	2640100	Normalized LFQ intensity	4.47567	0.255941	0.84862	2746.48	2746.48	2420.13	1.07538	2746.48	0.716917	0.956428	Low confidence
AMG-900	4 cell line mix	Kinobeads	TOP2B	1	0.571883	0.524228	0.589094	0.465156	0.446669	NA	0.421847	0.149755	3899000	Normalized LFQ intensity	0.131872	-0.326504	0.997921	2597.49	2597.49	9835.22	1.19774	2597.49	0.941273	-13.6862	Low confidence
AMG-900	4 cell line mix	Kinobeads	ULK1	1	1.84001	1.53765	1.86275	1.4045	1.20368	NA	0.928541	0.826402	1908200	Normalized LFQ intensity	1.99223	0.8751	1.54754	283.852	283.852	341.627	0.668058	189.63	0.559177	10.9042	High confidence
Amuvatinib	4 cell line mix	Kinobeads	CBR1	1	0.243727	0	0	0	0	0	0	0	4587200	Normalized LFQ intensity	3.55109	-0.00188562	0.999978	2.1856	2.1856	0.0458351	1.51425	2.1856	0.999969	-77.6464	Low confidence
Amuvatinib	4 cell line mix	Kinobeads	PYCR2	1	0.319514	0	0	0	0	0	0	0	6169000	Normalized LFQ intensity	4.1052	-0.000418703	1.00122	2.49846	2.49846	0.0200838	3.54698	2.49846	0.999986	-84.7696	Low confidence
Apatinib	4 cell line mix	Kinobeads	RET	1	0.967016	0.863368	0.788532	0.56972	0.485695	0.309976	0.126428	0.0213535	195280000	Normalized LFQ intensity	0.578937	-0.0471132	1.01411	251.658	251.658	69.9539	0.440569	110.873	0.993683	-28.3995	High confidence
Apatinib	4 cell line mix	Kinobeads	RIPK3	1	1.21297	0.911347	0.913727	0.992742	1.1148	0.773334	0.47374	0	21907000	Normalized LFQ intensity	1.50426	-0.0188383	1.02511	2653.61	2653.61	1067.35	0.894178	2372.8	0.926979	-5.82012	High confidence
Apatinib	4 cell line mix	Kinobeads	ZAK	1	1.00517	0.998966	1.21606	1.08932	1.06431	0.962486	0.853469	0.331224	87492000	Normalized LFQ intensity	1.311	0.235917	1.06222	6401.63	6401.63	6464.06	0.743597	4760.23	0.925477	-12.7939	High confidence
Apitolisib	4 cell line mix	Kinobeads	ABL1	1	1.14854	1.06596	1.13919	0.90777	0.967227	0.743478	0.769078	0.519113	81863000	Normalized LFQ intensity	0.660751	0.459522	1.08946	1486.12	1486.12	2217.46	0.547922	814.278	0.879858	-11.8985	High confidence
Apitolisib	4 cell line mix	Kinobeads	BTK	1	0.902656	0.926778	0.99809	0.854812	0.916227	0.696498	0.653802	0.379289	812690000	Normalized LFQ intensity	0.660273	0.228277	0.963949	3979.25	3979.25	6805.82	0.390881	1555.41	0.941669	-18.8109	High confidence
Apitolisib	4 cell line mix	Kinobeads	EGFR	1	0.987021	1.16047	1.32511	1.22241	0.949307	0.913312	0.765436	0	7942000	Normalized LFQ intensity	1.09371	-0.165308	1.11668	6146.31	6146.31	5826.2	0.793047	4874.31	0.906086	-2.93104	High confidence
Apitolisib	4 cell line mix	Kinobeads	FER	1	0.972909	0.943837	1.12745	0.830923	0.858968	0.685684	0.684766	0.388173	121440000	Normalized LFQ intensity	0.546794	0.206604	1.01502	3544.11	3544.11	9146.1	0.422267	1496.56	0.885612	-11.2666	High confidence
Apitolisib	4 cell line mix	Kinobeads	JAK1	1	1.50771	1.25266	1.08571	0.41792	0.510717	0.245993	0.170576	0	13575000	Normalized LFQ intensity	1.43886	0.165837	1.28133	69.4999	69.4999	56.3488	0.372562	25.893	0.891442	4.21335	High confidence
Apitolisib	4 cell line mix	Kinobeads	MAP2K5	1	0.773935	0.735212	0.710906	1.03012	1.05217	0.605016	0.640397	0.232497	12667000	Normalized LFQ intensity	1.22376	0.183134	0.870293	4083.36	4083.36	6401.15	0.875759	3576.04	0.684133	0.756336	High confidence
Apitolisib	4 cell line mix	Kinobeads	PAK4	1	0.947989	1.00309	1.04782	0.834416	0.761671	0.637519	0.61778	0.346047	229450000	Normalized LFQ intensity	0.563717	0.241571	1.0181	1503.89	1503.89	1949.34	0.600921	903.722	0.94575	-17.0108	High confidence
Apitolisib	4 cell line mix	Kinobeads	PRKCA	1	1.0045	1.137	1.07407	0.97063	0.805297	0.726165	0.672802	0.330429	27040000	Normalized LFQ intensity	0.605776	0.168187	1.0639	2930.98	2930.98	4120.22	0.728153	2134.2	0.938842	-14.4281	High confidence
Apitolisib	4 cell line mix	Kinobeads	SLK	1	0.990336	0.990548	1.05879	0.867888	0.934105	0.74698	0.701862	0.348118	89536000	Normalized LFQ intensity	0.550413	-0.0380121	1.01434	11418.4	11418.4	28854.5	0.890695	10170.3	0.954683	-19.4009	High confidence
Apitolisib	4 cell line mix	Kinobeads	STK10	1	1.07672	0.972964	0.918309	0.866244	0.987194	0.693158	0.574098	0.299704	31745000	Normalized LFQ intensity	0.783647	0.198455	1.00183	2478.62	2478.62	2748.69	0.915468	2269.1	0.939466	-14.5718	High confidence
Apitolisib	4 cell line mix	Kinobeads	TEC	1	0.935919	0.981319	1.09865	0.90951	0.94216	0.692676	0.565755	0.354418	40921000	Normalized LFQ intensity	1.10573	0.339947	0.998783	1417.39	1417.39	636.486	0.402382	570.33	0.950383	-17.0944	High confidence
Apitolisib	4 cell line mix	Kinobeads	ULK3	1	0.969319	0.949236	1.09429	0.889531	0.917626	0.676116	0.66358	0.423091	65437000	Normalized LFQ intensity	0.792859	0.378443	1.00379	1588.2	1588.2	1517.27	0.453962	720.984	0.919859	-15.1803	High confidence
ARRY-380	4 cell line mix	Kinobeads	EGFR	1	1.06531	0.886071	0.984647	0.916272	1.10872	0.648824	0.565938	0	25495000	Normalized LFQ intensity	1.16071	-0.0322077	0.994125	3195.77	3195.77	1829.36	0.793047	2534.39	0.923262	-6.55171	High confidence
ARRY-380	4 cell line mix	Kinobeads	FECH	1	1.08918	1.05629	0.979448	1.12764	1.08266	1.12061	0.922977	0.419097	59169000	Normalized LFQ intensity	4.69317	0.419071	1.06522	3931.54	3931.54	1765.1	0.994935	3911.63	0.949362	-18.6147	High confidence
ARRY-380	4 cell line mix	Kinobeads	MYH14	1	1.75949	1.15966	1.74802	0.737101	0.640718	0.512732	0.131276	0	6106900	Normalized Intensity	1.01893	0.0549383	1.40632	256.73	256.73	364.26	0.734006	188.441	0.779582	13.5005	Low confidence
ARRY-380	4 cell line mix	Kinobeads	NQO2	1	0.949423	0.934082	0.89947	1.21659	1.02501	0.918304	0.619202	0.368413	357220000	Normalized LFQ intensity	2.22282	0.366793	1.00382	2463.12	2463.12	938.317	1.06667	2463.12	0.866725	-7.84236	High confidence
ARRY-380	4 cell line mix	Kinobeads	RIPK3	1	1.25216	1.45595	1.47254	1.83776	2.21354	1.20138	0	0	19823000	Normalized LFQ intensity	7.26083	-0.0022562	1.53868	1191.28	1191.28	1457.77	0.894178	1065.22	0.792825	16.084	Low confidence
ASP-3026	4 cell line mix	Kinobeads	AAK1	1	0.866526	1.08054	0.853709	0.845932	0.744471	0.624173	0.393783	0.140793	167260000	Normalized LFQ intensity	0.642983	-0.00944811	0.978118	1968.55	1968.55	1958.18	0.673073	1324.98	0.953124	-13.8129	High confidence
ASP-3026	4 cell line mix	Kinobeads	ABL1	1	0.795476	0.888591	0.752237	0.678536	0.781805	0.8389	0.569	0.342551	167000000	Normalized LFQ intensity	0.428742	0.0663587	0.89958	9595.78	9595.78	19261.9	0.547922	5257.74	0.764757	-7.24703	High confidence
ASP-3026	4 cell line mix	Kinobeads	AURKB	1	0.776029	1.07806	1.21944	1.0183	0	0	0	0	6278800	Normalized LFQ intensity	11.4615	-0.00106792	1.0188	170.671	170.671	717.024	0.585272	99.8891	0.957193	-3.69957	High confidence
ASP-3026	4 cell line mix	Kinobeads	BMPR1B	1	1.00889	0.998947	1.16561	1.06124	0.911132	0.575412	0.551742	0	3207900	Normalized LFQ intensity	0.821934	-0.135148	1.0588	2969.24	2969.24	2483.46	0.613955	1822.98	0.946082	-8.7637	High confidence
ASP-3026	4 cell line mix	Kinobeads	BTK	1	0.695914	1.02406	0.894326	0.815145	0.750865	0.538064	0.310149	0.10041	971300000	Normalized LFQ intensity	0.996951	0.0647894	0.905639	1263.57	1263.57	811.942	0.390881	493.905	0.912322	-7.3552	High confidence
ASP-3026	4 cell line mix	Kinobeads	CAMK2D	1	0.882018	0.965636	0.900409	0.904293	0.960817	1.04362	0.755331	0.138416	1388700000	Normalized LFQ intensity	8.21775	0.138413	0.950972	3450.02	3450.02	2042.05	0.203913	703.505	0.965706	-18.1054	High confidence
ASP-3026	4 cell line mix	Kinobeads	CAMK2G	1	0.804531	0.794203	0.985618	1.05992	0.859507	0.900155	0.760273	0.130697	442460000	Normalized LFQ intensity	1.87259	0.0856958	0.918699	6511.75	6511.75	16719.8	0.217204	1414.38	0.895898	-8.14442	High confidence
ASP-3026	4 cell line mix	Kinobeads	CAMKK2	1	0.717677	0.741117	0.700906	0.684981	0.702001	0.68722	0.547178	0.24464	47286000	Normalized LFQ intensity	0.229524	-0.155561	0.95826	13742.5	13742.5	31981.1	0.664348	9129.79	0.844913	-10.4258	High confidence
ASP-3026	4 cell line mix	Kinobeads	CSNK2B	1	0.780834	0.840321	0.895445	0.919698	0.68848	0.371894	0.846754	0.223758	66753000	Normalized LFQ intensity	0.368616	-0.355091	0.938269	29018.4	29018.4	130889	1.08129	29018.4	0.621397	2.64456	Low confidence
ASP-3026	4 cell line mix	Kinobeads	DDR1	1	0.831057	0.940473	0.819845	0.781395	0.891899	0.836992	0.733478	0.382281	18731000	Normalized LFQ intensity	1.30769	0.315892	0.880322	6440.29	6440.29	12955.8	0.627266	4039.77	0.864921	-13.7369	High confidence
ASP-3026	4 cell line mix	Kinobeads	EGFR	1	1.01741	1.16589	1.04645	0.958948	0.868805	0.665861	0.815449	0.297179	9480200	Normalized LFQ intensity	0.470179	-0.38902	1.06671	26261.5	26261.5	107657	0.793047	20826.6	0.878595	-7.80482	High confidence
ASP-3026	4 cell line mix	Kinobeads	EIF3J	1	0.584086	0.836178	0.833315	0.77957	0.722907	0.302786	0.745374	0.178805	34241000	Normalized LFQ intensity	0.33143	-0.212583	0.902761	12460.5	12460.5	56287.7	1.10588	12460.5	0.581681	3.80069	Low confidence
ASP-3026	4 cell line mix	Kinobeads	EPHA2	1	0.705448	1.00355	0.918089	0.893085	0.92879	0.916163	0.68577	0.44635	128180000	Normalized LFQ intensity	6.42401	0.446346	0.909353	3032.25	3032.25	584.837	0.412958	1252.19	0.780966	-8.65345	High confidence
ASP-3026	4 cell line mix	Kinobeads	EPHB3	1	0.808399	1.11021	1.07885	1.02849	1.04491	0.920805	0.842095	0.389493	23569000	Normalized LFQ intensity	1.38815	0.320942	1.00951	6280.02	6280.02	8411.39	0.87586	5500.41	0.848582	-8.602	High confidence
ASP-3026	4 cell line mix	Kinobeads	ERN1	1	0.730171	0.835574	0.795253	0.734921	0.648144	0.690654	0.578863	0.270663	16955000	Normalized LFQ intensity	0.291656	-0.158043	0.943169	14972.1	14972.1	28919.5	0.814917	12201.1	0.885217	-12.9478	High confidence
ASP-3026	4 cell line mix	Kinobeads	FER	1	0.777937	0.968737	0.888114	0.830461	0.706795	0.424793	0.302848	0.0851758	182030000	Normalized LFQ intensity	0.936573	0.0657371	0.923735	860.411	860.411	401.429	0.422267	363.323	0.960586	-14.1236	High confidence
ASP-3026	4 cell line mix	Kinobeads	FES	1	0.707799	0.935564	0.800414	0.79801	0.823874	0.813257	0.568754	0.302729	80155000	Normalized LFQ intensity	2.47047	0.297619	0.84433	3036.26	3036.26	1159.69	0.369564	1122.09	0.839091	-9.24412	High confidence
ASP-3026	4 cell line mix	Kinobeads	FLT3	1	1.12673	0.569358	1.16558	1.04421	0.606725	0.44008	0.41195	0	7207600	Normalized LFQ intensity	0.799221	-0.0287412	0.997018	1167.08	1167.08	2091.41	0.537356	627.139	0.764595	5.90762	High confidence
ASP-3026	4 cell line mix	Kinobeads	FRK	1	0.617487	0.773118	0.936962	0.867146	0.807267	0.546254	0.449102	0.275133	131610000	Normalized LFQ intensity	1.45117	0.29165	0.844415	1148.96	1148.96	1045.94	0.339663	390.26	0.790467	-4.2099	High confidence
ASP-3026	4 cell line mix	Kinobeads	FYN	1	0.755227	0.957624	0.925382	0.91883	0.907534	0.867517	0.729194	0.492925	142640000	Normalized LFQ intensity	1.73433	0.48269	0.911733	3556.35	3556.35	2440.83	0.431007	1532.81	0.82516	-13.5102	High confidence
ASP-3026	4 cell line mix	Kinobeads	GAK	1	0.84502	0.929761	0.784985	0.783434	0.733485	0.574184	0.362093	0.127123	378880000	Normalized LFQ intensity	0.434718	-0.273118	0.962306	5021.95	5021.95	11293.8	0.56156	2820.13	0.972207	-19.5893	High confidence
ASP-3026	4 cell line mix	Kinobeads	GTPBP4	1	1.49462	0.269523	0	0	0.256465	0.165114	0	0.293015	3261500	Normalized Intensity	20.0315	0.118815	1.24731	9.10869	9.10869	4.62319	1.25001	9.10869	0.899051	2.96437	Low confidence
ASP-3026	4 cell line mix	Kinobeads	HCK	1	0.755962	0.993355	0.876343	0.852949	0.969916	0.843892	0.556208	0.351875	503580000	Normalized LFQ intensity	2.49437	0.351398	0.907532	2404.94	2404.94	837.237	0.518348	1246.6	0.875557	-10.735	High confidence
ASP-3026	4 cell line mix	Kinobeads	IGF1R	1	0.785804	1.03028	0.925856	0.915469	0.871823	0.791554	0.694425	0.30192	172150000	Normalized LFQ intensity	0.695136	-0.085302	0.940532	14690.9	14690.9	54707.7	0.661793	9722.35	0.906187	-13.1287	High confidence
ASP-3026	4 cell line mix	Kinobeads	INSR	1	0.883466	1.12826	1.1652	1.236	0.982195	0.954057	0.922637	0.521121	36728000	Normalized LFQ intensity	0.981879	0.327926	1.06706	10530.2	10530.2	36085.5	0.750837	7906.44	0.740355	-4.936	High confidence
ASP-3026	4 cell line mix	Kinobeads	LCK	1	0.67433	0.899771	0.884832	0.934898	0.961621	0.899256	0.620979	0.412151	670980000	Normalized LFQ intensity	7.48614	0.412149	0.893553	2895.15	2895.15	1489.81	0.440511	1275.35	0.786605	-7.72704	High confidence
ASP-3026	4 cell line mix	Kinobeads	LIMK1	1	0.878698	1.26208	1.10468	1.09339	1.04353	0.767046	0.907525	0	5803700	Normalized LFQ intensity	1.87221	-0.0032607	1.03365	6690.24	6690.24	5301.49	0.594601	3978.02	0.859873	-0.334513	High confidence
ASP-3026	4 cell line mix	Kinobeads	LIMK2	1	0.637754	1.12189	0.857951	0.87877	0.884098	0.833934	0.729943	0.363049	26811000	Normalized LFQ intensity	1.06409	0.231774	0.901575	8003.77	8003.77	38031	0.662896	5305.67	0.659854	-1.608	High confidence
ASP-3026	4 cell line mix	Kinobeads	NQO2	1	1.07024	1.39742	1.48135	1.34495	0.707917	0.585792	1.00999	0.0945881	122340000	Normalized LFQ intensity	0.618228	-0.239202	1.22968	6362.63	6362.63	21026.2	1.06667	6362.63	0.639294	11.6904	High confidence
ASP-3026	4 cell line mix	Kinobeads	PAG1	1	0.874747	0.716146	0.575803	0.539423	0.628662	0.746767	0.530167	0.210615	17268000	Normalized LFQ intensity	0.19968	-0.191579	0.995184	8920.99	8920.99	39395.5	0.49264	4394.84	0.747411	-3.60655	High confidence
ASP-3026	4 cell line mix	Kinobeads	PLK4	1	0.97401	1.06506	1.03787	0.970317	0	0	0	0	1824600	Normalized LFQ intensity	9.48728	-0.000251617	1.01924	137.014	137.014	183.186	0.509269	69.7769	0.997859	-31.1831	High confidence
ASP-3026	4 cell line mix	Kinobeads	PRKD2	1	0.815208	0.865468	0.865468	0.836157	0.834691	0.887926	0.730419	0.230213	45488000	Normalized LFQ intensity	4.219	0.230062	0.872299	4051.08	4051.08	3739.42	0.659146	2670.25	0.941318	-17.3234	High confidence
ASP-3026	4 cell line mix	Kinobeads	PTK2	1	0.810327	1.01831	0.783422	0.59403	0.439471	0.314733	0.206504	0.0951556	619080000	Normalized LFQ intensity	0.732129	0.0925487	0.977303	180.405	180.405	102.742	0.408006	73.6061	0.959824	-12.8545	High confidence
ASP-3026	4 cell line mix	Kinobeads	PTK2B	1	0.757472	0.989298	0.805598	0.664134	0.583365	0.419915	0.280952	0.105661	354720000	Normalized LFQ intensity	0.520289	-0.0163965	0.962102	657.733	657.733	748.827	0.414584	272.685	0.946002	-12.0244	High confidence
ASP-3026	4 cell line mix	Kinobeads	PTK6	1	0.891801	1.00321	1.10952	0.879532	0	0	0	0	2931300	Normalized LFQ intensity	8.5088	-8.85833e-05	1.00113	126.182	126.182	190.717	0.483081	60.9561	0.989003	-16.9252	High confidence
ASP-3026	4 cell line mix	Kinobeads	Q6ZSR9	1	0.850431	0.741725	0.664937	0.563316	0.594554	0.564068	0.299513	0	67638000	Normalized LFQ intensity	0.35498	-0.149822	0.963242	1079.12	1079.12	1577.15	0.761466	821.711	0.928897	-10.2721	High confidence
ASP-3026	4 cell line mix	Kinobeads	SIK2	1	0.723089	0.995144	0.734026	0.667998	0.404738	0.240057	0.136645	0.0426811	44691000	Normalized LFQ intensity	0.822041	0.0291648	0.923684	236.775	236.775	142.338	0.518256	122.71	0.941557	-8.5937	High confidence
ASP-3026	4 cell line mix	Kinobeads	SLK	1	0.925467	0.824803	0.746304	0.710891	0.698681	0.619394	0.46821	0.158586	195830000	Normalized LFQ intensity	0.297323	-0.694042	0.984182	40764.6	40764.6	63131.6	0.890695	36308.8	0.976874	-23.2164	High confidence
ASP-3026	4 cell line mix	Kinobeads	STK10	1	0.943692	0.848386	0.724063	0.744898	0.650585	0.531181	0.452217	0.0966584	87387000	Normalized LFQ intensity	0.304007	-0.726537	0.999982	25888.9	25888.9	42960.5	0.915468	23700.5	0.982126	-23.7728	High confidence
ASP-3026	4 cell line mix	Kinobeads	TEC	1	0.56513	0.977066	0.787578	0.810946	0.813472	0.703284	0.474718	0.211712	122350000	Normalized LFQ intensity	1.48915	0.195974	0.830765	2545.11	2545.11	2045.69	0.402382	1024.11	0.757857	-2.12907	High confidence
ASP-3026	4 cell line mix	Kinobeads	TNK1	1	1.15895	0.821312	0.575504	0.485831	0.39472	0	0	0	9847500	Normalized LFQ intensity	0.731006	-0.0448076	1.07667	75.9069	75.9069	50.7411	0.432597	32.8371	0.943552	-5.15041	High confidence
ASP-3026	4 cell line mix	Kinobeads	TNK2	1	1.04043	0.648312	0	0	0	0	0	0	10025000	Normalized LFQ intensity	7.14815	-0.000572071	1.02026	10.8097	10.8097	0.659313	0.450162	4.86611	0.999516	-47.1676	High confidence
ASP-3026	4 cell line mix	Kinobeads	YES1	1	0.799551	0.870419	1.05283	1.05773	1.08902	0.904644	0.623588	0.522943	44022000	Normalized LFQ intensity	2.88182	0.525066	0.977197	1891.02	1891.02	1086.99	0.41317	781.313	0.784849	-7.33185	High confidence
AT-13148	4 cell line mix	Kinobeads	ADRBK1	1	1.79882	1.75925	0.946339	0.757347	0.683499	0.528838	0.297912	0	80510000	Normalized LFQ intensity	0.819427	0.116814	1.46912	170.274	170.274	335.843	1.12537	170.274	0.767361	13.2837	High confidence
AT-13148	4 cell line mix	Kinobeads	LATS1	1	3.31977	3.76377	2.11355	0	0	0	0.512568	0	16223000	Normalized LFQ intensity	10.5094	0.10319	2.69451	33.7614	33.7614	91.03	0.787536	26.5883	0.746	30.5174	High confidence
AT-13148	4 cell line mix	Kinobeads	PKN1	1	3.69675	3.17467	1.03428	0.288805	0.170566	0.188252	0.173519	0.0614505	202920000	Normalized LFQ intensity	9.4263	0.175393	2.62375	28.1021	28.1021	19.166	0.874092	24.5638	0.73176	29.4894	High confidence
AT-13148	4 cell line mix	Kinobeads	PKN2	1	5.19248	2.32414	0	0	0	0	0	0	12974000	Normalized LFQ intensity	7.43907	-0.00533338	3.09603	11.602	11.602	15.4715	0.815959	9.46676	0.652662	36.3136	High confidence
AT-13148	4 cell line mix	Kinobeads	PRKACA	1	3.21	3.0003	1.50185	0.405228	0.125535	0.239366	0.204033	0.151482	736860000	Normalized LFQ intensity	10.4493	0.225	2.40344	31.0154	31.0154	25.3078	0.470095	14.5802	0.750212	26.7138	High confidence
AT-13148	4 cell line mix	Kinobeads	PRKACB	1	3.09811	3.35408	1.43379	0.526458	0.226219	0.208909	0.194169	0.140612	51093000	Normalized LFQ intensity	9.7879	0.259392	2.48407	30.3475	30.3475	7.02287	0.472983	14.3538	0.732323	27.8446	High confidence
AT-13148	4 cell line mix	Kinobeads	PRKCD	1	4.7335	4.02966	2.9659	0.891218	0.276736	1.18321	0.937927	0.815965	121610000	Normalized LFQ intensity	4.72875	0.809535	3.25219	46.3567	46.3567	91.6651	0.947106	43.9048	0.599671	35.8142	High confidence
AT-13148	4 cell line mix	Kinobeads	ROCK1	1	4.47988	3.73644	1.32466	0.0149509	0.0114244	0.0129146	0.00511858	0.00709012	930200000	Normalized LFQ intensity	10.4517	0.00815179	3.07207	29.1999	29.1999	15.3528	0.909344	26.5527	0.723798	33.8937	High confidence
AT-13148	4 cell line mix	Kinobeads	ROCK2	1	4.9154	4.18795	1.69529	0.0185788	0.0179142	0.0218337	0.00775062	0.00686398	1117700000	Normalized LFQ intensity	9.69571	0.0164467	3.36773	30.0128	30.0128	5.1881	0.871861	26.1669	0.710037	36.1955	High confidence
AT-7519	4 cell line mix	Kinobeads	AFF1	1	0.295474	0.183655	0	0	0	0	0	0	2158500	Normalized Intensity	0.732436	-0.00468448	1.0066	0.828555	0.828555	0.37308	0.926593	0.767733	0.991651	-27.4898	High confidence
AT-7519	4 cell line mix	Kinobeads	AFF4	1	1.52902	0.901751	0.420161	0.338803	0	0	0	0	3670000	Normalized LFQ intensity	1.58804	0.0321463	1.25144	21.5441	21.5441	11.5176	1.00904	21.5441	0.907719	3.52333	High confidence
AT-7519	4 cell line mix	Kinobeads	BRD4;BRD3	1	0.812768	0.469829	0.076967	0.178577	0.21187	0.129993	0.192401	0.418394	1069900	Normalized Intensity	3.51888	0.201864	0.916741	8.4104	8.4104	NA	2.16902	8.4104	0.898742	-5.43821	Low confidence
AT-7519	4 cell line mix	Kinobeads	CABLES1	1	1.29468	1.04493	1.28703	1.27314	1.42359	1.06319	0.895006	0.372988	7726300	Normalized LFQ intensity	1.71499	0.348339	1.21209	3967.17	3967.17	2867.25	0.549533	2180.09	0.81651	-0.677441	High confidence
AT-7519	4 cell line mix	Kinobeads	CCNA2	1	1.16376	0.90292	1.16982	0.784323	0.57207	0.383855	0.223571	0	18812000	Normalized LFQ intensity	0.839415	-0.00120127	1.08074	442.464	442.464	290.469	0.86194	381.378	0.942757	-5.92344	High confidence
AT-7519	4 cell line mix	Kinobeads	CCNB1	1	1.04567	0.905994	1.19562	0.927263	0.608966	0.49135	0.205869	0	36829000	Normalized LFQ intensity	0.968709	-0.00119561	1.04406	692.841	692.841	382.769	0.766242	530.884	0.944408	-6.65871	High confidence
AT-7519	4 cell line mix	Kinobeads	CCNB2	1	0.889241	0.854642	0.942932	0.84837	0.638073	0.409808	0.216879	0	14214000	Normalized LFQ intensity	0.905063	-0.028364	0.941188	828.083	828.083	235.331	0.701269	580.709	0.985567	-21.263	High confidence
AT-7519	4 cell line mix	Kinobeads	CCNE1	1	4.08683	1.86239	1.16737	1.13709	0.65656	0.161551	0.160083	0	2321800	Normalized Intensity	1.09029	0.0845204	2.32696	67.2555	67.2555	148.636	0.728854	49.0194	0.566106	32.0954	High confidence
AT-7519	4 cell line mix	Kinobeads	CCNE2	1	6.04526	4.6406	1.67954	2.94242	1.3725	0.832352	0	0	516140	Normalized Intensity	1.08132	-0.00602743	3.55885	227.151	227.151	457.647	0.760273	172.697	0.516758	42.2193	Low confidence
AT-7519	4 cell line mix	Kinobeads	CCNH	1	1.05642	1.0453	1.1495	1.05869	1.00673	0.95406	0.817521	0.386178	41376000	Normalized LFQ intensity	1.07319	0.266891	1.06026	6091.75	6091.75	4323.04	0.758128	4618.33	0.968386	-22.3037	High confidence
AT-7519	4 cell line mix	Kinobeads	CCNI	1	5.13378	2.47553	1.72278	1.95766	1.62075	0.247976	0.256638	0	1181000	Normalized Intensity	1.01062	-0.00489226	2.72511	256.905	256.905	535.588	0.37147	95.4323	0.514008	37.1971	Low confidence
AT-7519	4 cell line mix	Kinobeads	CCNK	1	1.2874	0.972128	0.863908	0.386565	0.196196	0.0441158	0	0	27548000	Normalized LFQ intensity	1.31086	0.00999463	1.12619	66.7695	66.7695	19.9944	1.1145	66.7695	0.971436	-8.87001	High confidence
AT-7519	4 cell line mix	Kinobeads	CCNT1	1	0.879078	0.486116	0.154461	0.0379674	0.00945864	0	0	0	56553000	Normalized LFQ intensity	1.57801	0.00382621	1.00503	9.74022	9.74022	0.219807	0.983173	9.57633	0.999738	-55.0803	High confidence
AT-7519	4 cell line mix	Kinobeads	CCNT2	1	0.852785	0.451271	0	0	0	0	0	0	6771900	Normalized LFQ intensity	2.27698	-0.0013778	0.968384	9.01818	9.01818	0.864707	0.880012	7.9361	0.994976	-28.2479	High confidence
AT-7519	4 cell line mix	Kinobeads	CDK1	1	1.00979	0.930338	1.03173	0.961041	0.784644	0.685419	0.40559	0.0887958	258720000	Normalized LFQ intensity	0.866595	-0.00185665	1.00131	2049.02	2049.02	693.996	0.685984	1405.6	0.985383	-22.7922	High confidence
AT-7519	4 cell line mix	Kinobeads	CDK12	1	1.20564	1.01615	1.03102	0.626968	0.329782	0.310649	0.546553	0	199570000	Normalized LFQ intensity	0.575882	-0.00106844	1.14791	249.779	249.779	NA	1.11983	249.779	0.829964	3.5517	High confidence
AT-7519	4 cell line mix	Kinobeads	CDK13	1	1.35853	1.20166	1.13425	0.877603	0.422642	0	0	0	8352200	Normalized LFQ intensity	1.66845	-0.0245449	1.18511	203.18	203.18	50.5939	1.24846	203.18	0.972107	-7.10116	High confidence
AT-7519	4 cell line mix	Kinobeads	CDK16	1	0.858172	0.417682	0	0	0	0	0	0	6476200	Normalized LFQ intensity	2.21719	-0.0037992	0.978622	8.43584	8.43584	0.663302	0.942646	7.95202	0.996561	-31.6977	High confidence
AT-7519	4 cell line mix	Kinobeads	CDK17	1	3.1924	0	0	0	0	0	0	0	684000	Normalized Intensity	11.7345	-0.00318023	2.09596	6.90685	6.90685	13.0985	1.02071	6.90685	0.739764	24.6469	High confidence
AT-7519	4 cell line mix	Kinobeads	CDK2	1	1.01673	0.95336	0.991208	0.735954	0.521623	0.299843	0.129171	0.0301841	327010000	Normalized LFQ intensity	0.9408	0.0237496	1.01924	317.63	317.63	56.8899	0.532482	169.132	0.993707	-26.7544	High confidence
AT-7519	4 cell line mix	Kinobeads	CDK4	1	1.31977	1.14468	1.29689	0	0.980557	0	0	0	2509400	Normalized LFQ intensity	0.915221	-0.00130914	1.21461	131.424	131.424	260.872	1	131.424	0.661636	16.983	High confidence
AT-7519	4 cell line mix	Kinobeads	CDK5	1	1.09315	1.06162	1.2433	1.075	0.957258	0.951293	0.593296	0.207549	625740000	Normalized LFQ intensity	1.38414	0.172388	1.08557	2794.11	2794.11	1094.98	0.523615	1463.04	0.945991	-11.5169	High confidence
AT-7519	4 cell line mix	Kinobeads	CDK6	1	1.13956	1.01067	1.15182	1.20525	0.787173	0.712158	0.386399	0	11673000	Normalized LFQ intensity	1.06489	-0.00120301	1.09443	1592.23	1592.23	773.308	0.819855	1305.39	0.942	-6.49527	High confidence
AT-7519	4 cell line mix	Kinobeads	CDK7	1	1.21805	1.17961	1.21209	1.2511	1.20278	1.10481	0.970423	0.458325	72500000	Normalized LFQ intensity	1.56658	0.407045	1.17581	5598.09	5598.09	5379.59	0.725457	4061.17	0.915774	-11.8522	High confidence
AT-7519	4 cell line mix	Kinobeads	CDK9	1	0.758667	0.497906	0.222112	0.0852421	0.035184	0	0	0	134860000	Normalized LFQ intensity	1.02465	-0.00154852	0.998592	9.54332	9.54332	0.348284	0.711499	6.79006	0.999592	-52.3851	High confidence
AT-7519	4 cell line mix	Kinobeads	CLK1	1	1.90926	1.5496	1.48971	1.71705	1.5634	1.04499	1.27706	0	5983600	Normalized LFQ intensity	1.59657	-0.00843445	1.49686	6242.35	6242.35	6140.29	0.715477	4466.26	0.747341	12.8162	High confidence
AT-7519	4 cell line mix	Kinobeads	CLK3	1	4.8048	2.537	0.409515	0.824796	1.147	0.117072	0	0.154714	2740800	Normalized Intensity	8.39761	0.434578	2.90214	12.3206	12.3206	39.2517	1.02868	12.3206	0.571483	35.7623	Low confidence
AT-7519	4 cell line mix	Kinobeads	CTTN	1	0.572788	0.619724	0.18989	0.225435	0.296673	0.23912	0.274009	0.197636	10069000	Normalized Intensity	0.834989	0.225818	0.995602	3.46077	3.46077	2.5727	0.884987	3.06274	0.899399	-8.4236	Low confidence
AT-7519	4 cell line mix	Kinobeads	DCAF7	1	1.10371	1.00111	1.02411	1.12144	0.853592	0.752771	0.489725	0.303965	7264600	Normalized LFQ intensity	1.15291	0.283507	1.04887	1312.36	1312.36	484.047	0.89643	1176.44	0.959206	-15.9027	High confidence
AT-7519	4 cell line mix	Kinobeads	DYRK1A	1	0.925363	0.857686	1.13877	1.08692	0.772636	0.656564	0.374378	0.192058	9297900	Normalized LFQ intensity	1.25855	0.18219	0.995543	1177.07	1177.07	624.803	0.933007	1098.22	0.911724	-6.83645	High confidence
AT-7519	4 cell line mix	Kinobeads	FIBP	1	1.22708	1.13016	1.31042	1.13022	1.08697	1.08545	0.79828	0.363619	62185000	Normalized LFQ intensity	1.7342	0.34453	1.152	3489.85	3489.85	1729.31	0.570275	1990.18	0.909519	-8.8822	High confidence
AT-7519	4 cell line mix	Kinobeads	GEMIN4	1	2.5277	2.42714	1.20208	0.986742	0.349689	0.322853	0.305688	0	1561300	Normalized Intensity	1.53384	0.200849	1.92324	72.7512	72.7512	76.6489	1.15019	72.7512	0.736457	21.9673	Low confidence
AT-7519	4 cell line mix	Kinobeads	GSK3A	1	1.14972	0.935201	0.770501	0.419367	0.125857	0.0682032	0.022764	0.00220612	322830000	Normalized LFQ intensity	1.25025	0.0124757	1.06674	65.151	65.151	12.1678	0.500216	32.5896	0.989395	-19.1642	High confidence
AT-7519	4 cell line mix	Kinobeads	GSK3B	1	0.897851	0.812931	0.866431	0.511743	0.263307	0.133297	0.0462822	0.00828573	323230000	Normalized LFQ intensity	1.08711	0.0182443	0.94658	124.923	124.923	29.1475	0.464999	58.089	0.985516	-19.1486	High confidence
AT-7519	4 cell line mix	Kinobeads	MAPK7	1	1.25931	1.27076	1.04603	1.24944	0.743769	0	0	0	3789500	Normalized LFQ intensity	7.26252	-0.0012629	1.16515	324.503	324.503	89.1639	0.778912	252.759	0.973745	-7.35888	High confidence
AT-7519	4 cell line mix	Kinobeads	PTMA	1	0.365949	0.349342	0.213394	0.0802673	0.0750845	0.0686694	0.167856	0.127712	10176000	Normalized Intensity	0.609487	0.0946489	0.998734	1.02022	1.02022	0.759735	1.54853	1.02022	0.970166	-18.1086	Low confidence
AT-7519	4 cell line mix	Kinobeads	TAOK1	1	1.74169	1.29756	1.53738	1.3796	1.19763	0.914789	0.723474	0.36142	4452300	Normalized LFQ intensity	1.05139	0.339419	1.40062	1403.93	1403.93	1565.77	0.664809	933.344	0.780191	6.48732	High confidence
AT-7519	4 cell line mix	Kinobeads	TAOK2	1	1.28598	1.18985	1.19672	1.08907	0.978227	0.654613	0.320699	0	11355000	Normalized LFQ intensity	1.1639	-0.0012796	1.16768	1250.79	1250.79	390.285	0.589614	737.483	0.970371	-10.9038	High confidence
AT-7519	4 cell line mix	Kinobeads	TAOK3	1	0.908061	0.795575	0.876085	1.01212	0.86621	0.729185	0.655335	0.223628	40396000	Normalized LFQ intensity	0.81093	-0.0195474	0.921684	8267.16	8267.16	19121.9	0.773652	6395.91	0.916317	-12.5043	High confidence
AT-9283	4 cell line mix	Kinobeads	AAK1	1	1.10194	0.805468	0.501191	0.157755	0.111668	0.0394518	0.0105082	0.010921	290840000	Normalized LFQ intensity	1.39937	0.0311248	1.05921	25.9443	25.9443	4.29011	0.673073	17.4624	0.989611	-20.1203	High confidence
AT-9283	4 cell line mix	Kinobeads	ABL1	1	1.14663	1.121	1.13974	0.649778	0.752914	0.519646	0.319001	0.107314	291410000	Normalized LFQ intensity	0.693482	0.0576106	1.11646	574.125	574.125	547.411	0.547922	314.576	0.918305	-4.36806	High confidence
AT-9283	4 cell line mix	Kinobeads	ABL2	1	1.07456	1.06948	1.08638	0.724638	0.861197	0.705037	0.512868	0.20005	215840000	Normalized LFQ intensity	0.538951	-0.0571977	1.06423	3265.42	3265.42	6192.48	0.331378	1082.09	0.920502	-8.85974	High confidence
AT-9283	4 cell line mix	Kinobeads	ACAD10	1	1.25712	1.29272	0	0.785507	0.742485	0	0	0	5891800	Normalized LFQ intensity	0.595809	-0.104937	1.1355	149.936	149.936	426.622	0.958432	143.703	0.592324	17.1184	Low confidence
AT-9283	4 cell line mix	Kinobeads	ACVR1	1	1.81426	1.4058	1.253	0.724311	0.671937	0.225785	0.197621	0	14501000	Normalized LFQ intensity	1.02849	0.0676423	1.42099	163.117	163.117	150.032	0.478716	78.0869	0.860802	8.87679	High confidence
AT-9283	4 cell line mix	Kinobeads	ACVR1B	1	1.16807	1.15477	1.14936	0.752301	0.797648	0.57629	0.455005	0	16666000	Normalized LFQ intensity	0.589476	-0.185874	1.12758	1907.27	1907.27	2318.19	0.425219	811.009	0.933147	-5.71507	High confidence
AT-9283	4 cell line mix	Kinobeads	ACVRL1	1	0.946529	0.524363	0.450698	0	0	0	0	0	929470	Normalized Intensity	1.17838	-0.00118675	1.01441	15.4488	15.4488	5.07941	1.23467	15.4488	0.968786	-11.2587	High confidence
AT-9283	4 cell line mix	Kinobeads	ADCK1	1	1.33478	0.891725	1.03245	0.922285	0.870093	0.580863	0.465692	0.246755	22070000	Normalized LFQ intensity	0.739434	0.185327	1.09454	897.899	897.899	971.82	0.622595	559.027	0.876056	-3.27366	High confidence
AT-9283	4 cell line mix	Kinobeads	AFF1	1	2.1349	2.50179	2.0478	2.15054	1.14592	1.50759	0.402047	0	1343200	Normalized Intensity	1.2495	-0.00248496	1.91807	1460.76	1460.76	1536.6	0.926593	1353.53	0.70165	21.871	High confidence
AT-9283	4 cell line mix	Kinobeads	AFF4	1	1.42666	1.14669	1.17343	0.806888	0.800857	0.734196	0.475907	0	8399200	Normalized LFQ intensity	0.558208	-0.269759	1.19722	2660.58	2660.58	4711.77	1.00904	2660.58	0.886302	0.384224	High confidence
AT-9283	4 cell line mix	Kinobeads	AP2A1	1	1.00451	0.875172	0.752103	0.444559	0.348618	0.401274	0.417297	0.634312	25048000	Normalized LFQ intensity	2.1866	0.443346	0.980589	31.0124	31.0124	14.9189	0.918545	28.4863	0.899511	-9.16962	High confidence
AT-9283	4 cell line mix	Kinobeads	AP2B1	1	0.965382	0.899909	0.663397	0.679537	0.593533	0.568319	0.483512	0.586689	19636000	Normalized LFQ intensity	1.11718	0.556463	1.01099	19.516	19.516	8.79723	1.0069	19.516	0.943789	-20.3481	High confidence
AT-9283	4 cell line mix	Kinobeads	AURKA	1	0.99025	0.928537	0.681371	0.25149	0.161439	0.0832937	0.0499841	0.0585176	272510000	Normalized LFQ intensity	1.58051	0.0713756	1.0045	44.2001	44.2001	3.31542	0.353704	15.6338	0.997626	-34.3246	High confidence
AT-9283	4 cell line mix	Kinobeads	AURKB	1	1.09038	0.84992	0.518786	0.077117	0.0426558	0	0	0	70201000	Normalized LFQ intensity	1.71913	0.000846752	1.04169	28.2394	28.2394	3.1246	0.585272	16.5277	0.994018	-24.2059	High confidence
AT-9283	4 cell line mix	Kinobeads	AZI2	1	1.01005	0.670863	0.699415	0.527848	0.329137	0.169692	0.105759	0.083046	49895000	Normalized LFQ intensity	0.643926	0.0399677	1.01567	76.5643	76.5643	40.4352	0.701841	53.736	0.967727	-13.7413	High confidence
AT-9283	4 cell line mix	Kinobeads	BCR	1	1.07666	0.8798	0.934335	0.545722	0.591187	0.418141	0.246181	0.0782763	123960000	Normalized LFQ intensity	0.56707	0.0194451	1.05207	325.513	325.513	293.283	0.477847	155.546	0.949101	-10.0897	High confidence
AT-9283	4 cell line mix	Kinobeads	BMP2K	1	1.2844	0.969582	0.876828	0.299178	0.229491	0.129426	0.0764752	0.0625979	193260000	Normalized LFQ intensity	1.75572	0.103951	1.11345	51.9009	51.9009	14.6509	0.660952	34.304	0.963797	-7.6819	High confidence
AT-9283	4 cell line mix	Kinobeads	BMPR1A	1	1.12887	1.13529	1.09017	0.573997	0.797071	0.442708	0.308207	0	16789000	Normalized LFQ intensity	0.637743	-0.0707393	1.10787	734.537	734.537	857.84	0.528053	387.874	0.903302	-1.59132	High confidence
AT-9283	4 cell line mix	Kinobeads	BMPR1B	1	1.06837	0.993484	0	0.870072	0	0	0	0	3076400	Normalized LFQ intensity	0.802642	-0.00106609	1.08468	34.3161	34.3161	64.8638	0.613955	21.0685	0.667877	13.7946	High confidence
AT-9283	4 cell line mix	Kinobeads	BMPR2	1	1.35791	1.21052	0.745848	0.485685	0	0.351399	0	0	9100800	Normalized LFQ intensity	1.5122	0.0809308	1.2023	51.0689	51.0689	27.1298	0.841936	42.9968	0.909358	2.54793	High confidence
AT-9283	4 cell line mix	Kinobeads	BTK	1	1.12162	1.14966	1.08794	0.784169	0.906873	0.640974	0.42543	0.164191	2097700000	Normalized LFQ intensity	0.717297	0.0614072	1.09111	1374.14	1374.14	1099.65	0.390881	537.124	0.939571	-9.16352	High confidence
AT-9283	4 cell line mix	Kinobeads	BUB1	1	1.19262	1.0528	1.11158	0.397992	0	0	0	0	8723700	Normalized LFQ intensity	9.49901	9.12742e-05	1.08926	94.3513	94.3513	45.1086	1.04467	94.3513	0.991512	-18.2435	High confidence
AT-9283	4 cell line mix	Kinobeads	C2CD5	1	1.10677	1.05774	1.16445	0.722033	0.99512	0.79354	0.602325	0.360945	194140000	Normalized LFQ intensity	0.626362	0.195178	1.06634	2876.4	2876.4	6506.69	0.545264	1568.4	0.821315	-3.8219	High confidence
AT-9283	4 cell line mix	Kinobeads	CABLES1	1	1.11826	1.09028	1.04691	0.679514	1.05835	0.668362	0.684436	0.43844	14879000	Normalized LFQ intensity	0.535319	0.309094	1.07077	1857.3	1857.3	5658.98	0.549533	1020.65	0.732253	-1.50522	High confidence
AT-9283	4 cell line mix	Kinobeads	CCNT1	1	0.983764	1.00088	1.16398	0.714895	0.989565	0.781449	0.474098	0.235488	97858000	Normalized LFQ intensity	1.36869	0.212795	0.988503	1943.88	1943.88	1198.08	0.983173	1911.17	0.854669	-3.65484	High confidence
AT-9283	4 cell line mix	Kinobeads	CCNT2	1	1.40435	1.03177	1.19664	0.78315	0.780072	0	0.458874	0	11293000	Normalized LFQ intensity	1.26119	0.115507	1.1635	264.306	264.306	208.991	0.880012	232.592	0.826689	7.12722	High confidence
AT-9283	4 cell line mix	Kinobeads	CDC7	1	1.30526	1.49081	1.01221	1.0496	0.650854	0.687896	0	0	352030	Normalized Intensity	0.980344	-0.00175904	1.2229	554.589	554.589	469.186	0.92117	510.871	0.87072	5.41426	Low confidence
AT-9283	4 cell line mix	Kinobeads	CDK10	1	0.502829	0.753984	0	0	0	0	0	0	864130	Normalized Intensity	1.06459	-0.0033884	0.942449	8.74452	8.74452	10.7827	1.34624	8.74452	0.847167	1.89351	Low confidence
AT-9283	4 cell line mix	Kinobeads	CDK16	1	1.46664	1.50926	1.29529	0	0.684736	0	0	0	14299000	Normalized LFQ intensity	28.0943	0.138052	1.3253	34.1665	34.1665	240.998	0.942646	32.2069	0.852855	11.1182	High confidence
AT-9283	4 cell line mix	Kinobeads	CDK17	1	1.31531	1.00611	1.28318	0.895045	0.931304	0.953727	0	0	4760400	Normalized LFQ intensity	15.122	-0.00135643	1.07182	1148.24	1148.24	NA	1.02071	1148.24	0.913801	0.50474	High confidence
AT-9283	4 cell line mix	Kinobeads	CDK4	1	0.968609	0.859604	0.771402	0.737369	0.765883	0.707785	0	0	6494200	Normalized LFQ intensity	6.35371	-0.00182457	0.850514	1286.8	1286.8	1849.37	1	1286.8	0.945663	-8.18809	High confidence
AT-9283	4 cell line mix	Kinobeads	CDK5	1	1.14158	0.95771	0.94615	0.783198	1.10587	0.805442	0.59987	0.274604	909600000	Normalized LFQ intensity	1.45722	0.255809	0.989835	2645.11	2645.11	1698.25	0.523615	1385.02	0.849821	-5.00246	High confidence
AT-9283	4 cell line mix	Kinobeads	CDK6	1	1.32064	1.09864	1.31255	0.478297	0.736224	0.234834	0.199239	0.126967	23219000	Normalized LFQ intensity	1.04015	0.141615	1.1924	171.122	171.122	171.042	0.819855	140.295	0.842234	5.67138	High confidence
AT-9283	4 cell line mix	Kinobeads	CDK9	1	1.18206	1.03376	1.21387	0.883244	1.00072	0.83716	0.556394	0.259753	350190000	Normalized LFQ intensity	0.951896	0.183809	1.08435	2305.21	2305.21	1822.07	0.711499	1640.16	0.910147	-7.56726	High confidence
AT-9283	4 cell line mix	Kinobeads	CHEK1	1	1.18132	1.09024	1.10846	0.568877	0.419562	0.285549	0.193328	0.111208	35953000	Normalized LFQ intensity	1.56854	0.197297	1.11907	101.974	101.974	37.1726	0.824825	84.1108	0.961901	-9.01397	High confidence
AT-9283	4 cell line mix	Kinobeads	CLK1	1	1.22715	1.11466	1.0326	0.641805	0.851478	0.834584	0.520607	0	13009000	Normalized LFQ intensity	0.694742	-0.0718877	1.06072	2857.9	2857.9	3490.51	0.715477	2044.76	0.842649	1.1481	High confidence
AT-9283	4 cell line mix	Kinobeads	CSK	1	1.04791	1.0692	1.08839	0.888473	1.23402	0.956675	0.736309	0.468134	2145300000	Normalized LFQ intensity	2.12561	0.466107	1.05097	2736.63	2736.63	1193.3	0.538187	1472.82	0.835148	-7.55426	High confidence
AT-9283	4 cell line mix	Kinobeads	CSNK2A1;CSNK2A3	1	1.19603	1.04934	0.954079	0.570999	0.426787	0.195525	0.139553	0.137767	233070000	Normalized LFQ intensity	1.16902	0.137987	1.10615	106.062	106.062	30.8447	1.01946	106.062	0.977658	-14.0876	High confidence
AT-9283	4 cell line mix	Kinobeads	CSNK2A2	1	1.17331	1.0371	0.876159	0.40293	0.260884	0.0843311	0.0436797	0.105762	321670000	Normalized LFQ intensity	1.49501	0.0865849	1.09245	67.3639	67.3639	13.9274	0.962701	64.8514	0.9839	-15.5784	High confidence
AT-9283	4 cell line mix	Kinobeads	CSNK2B	1	1.29814	1.11359	1.00169	0.50381	0.464284	0.137336	0.0586896	0.0992433	135490000	Normalized LFQ intensity	1.15413	0.0854757	1.16508	102.586	102.586	46.8688	1.08129	102.586	0.950907	-4.83992	High confidence
AT-9283	4 cell line mix	Kinobeads	DCAF7	1	1.1437	1.07888	0.907334	0.973572	1.16539	0.836296	0.583494	0.500649	17072000	Normalized LFQ intensity	4.34473	0.538164	1.04475	1093.63	1093.63	715.792	0.89643	980.359	0.875363	-9.37559	High confidence
AT-9283	4 cell line mix	Kinobeads	DYNLL1	1	1.13862	1.03731	0.954723	0.588856	1.21419	0.737372	0.739501	0.393884	32329000	Normalized LFQ intensity	0.477738	-0.174406	1.0285	25432.6	25432.6	175194	0.500942	12740.3	0.56334	4.43797	Low confidence
AT-9283	4 cell line mix	Kinobeads	DYNLL2	1	0.906774	1.33174	0.865785	1.09294	0.968421	0.771132	0.695299	0.325516	8157600	Normalized LFQ intensity	0.838801	0.209626	1.0481	3585.1	3585.1	7533.51	0.54642	1958.97	0.766486	-0.55694	Low confidence
AT-9283	4 cell line mix	Kinobeads	DYRK1A	1	1.24125	1.45767	1.54065	0.886984	1.431	1.1537	0.652936	0.217517	17424000	Normalized LFQ intensity	2.49601	0.216091	1.25775	2622.35	2622.35	1276.78	0.933007	2446.67	0.75906	7.4548	High confidence
AT-9283	4 cell line mix	Kinobeads	EIF3J	1	1.29507	1.05768	0.961681	0.458363	0.364693	0.141669	0.0719296	0.12026	139510000	Normalized LFQ intensity	1.34528	0.116238	1.14706	76.6191	76.6191	27.5081	1.10588	76.6191	0.960123	-7.06952	High confidence
AT-9283	4 cell line mix	Kinobeads	EPHA2	1	1.12985	1.06503	1.15018	0.800498	1.01	0.916273	0.772445	0.588133	89261000	Normalized LFQ intensity	0.605258	0.46588	1.06908	3460.3	3460.3	8130.4	0.412958	1428.96	0.749176	-7.27563	High confidence
AT-9283	4 cell line mix	Kinobeads	EPHA4	1	1.05336	1.10374	1.05933	0.560458	0.782851	0.931386	0.810518	0.243204	21970000	Normalized LFQ intensity	0.564634	-0.892341	0.983487	71265.9	71265.9	281171	0.616594	43942.1	0.667955	2.75034	High confidence
AT-9283	4 cell line mix	Kinobeads	EPHA7	1	1.17823	0.468041	0	0.0526061	0.0657861	0	0	0	1008800	Normalized Intensity	10.9154	0.0199174	1.08912	9.70546	9.70546	1.85427	0.791806	7.68484	0.988305	-18.1713	High confidence
AT-9283	4 cell line mix	Kinobeads	EPHB6	1	0.950396	1.05486	0	0	0	0	0	0	8415100	Normalized LFQ intensity	13.3519	-0.000949891	1.00179	19.5384	19.5384	10.237	0.614674	12.0097	0.997274	-30.0994	High confidence
AT-9283	4 cell line mix	Kinobeads	FAM58A;FAM58BP	1	1.02041	1.00614	0.560842	0.777157	0.458683	0.288073	0.347766	0	1009500	Normalized Intensity	0.501344	-0.0448305	1.04719	318.25	318.25	522.226	0.722993	230.092	0.892965	-2.7076	High confidence
AT-9283	4 cell line mix	Kinobeads	FER	1	1.06809	1.14738	1.10421	0.725944	0.808401	0.5717	0.397775	0.193304	351030000	Normalized LFQ intensity	0.719153	0.140829	1.08681	726.297	726.297	598.621	0.422267	306.691	0.930657	-8.1259	High confidence
AT-9283	4 cell line mix	Kinobeads	FGFR1	1	0.700914	0.931279	0.672498	0	0	0.384334	0	0	8679800	Normalized LFQ intensity	9.9897	0.0769851	0.8774	33.3812	33.3812	45.5418	0.736349	24.5802	0.884367	0.657816	High confidence
AT-9283	4 cell line mix	Kinobeads	FGR	1	0.932137	1.09201	0.959213	0.754412	0.915739	0.705027	0.519917	0	6605000	Normalized LFQ intensity	0.897306	-0.0967415	0.970368	3663.47	3663.47	2537.49	0.419542	1536.98	0.939242	-9.40865	High confidence
AT-9283	4 cell line mix	Kinobeads	FIBP	1	1.08919	0.984381	0.945781	0.819366	0.989413	0.954976	0.714733	0.445319	75905000	Normalized LFQ intensity	3.11995	0.444896	0.971326	3048.67	3048.67	755.728	0.570275	1738.58	0.874645	-12.4533	Low confidence
AT-9283	4 cell line mix	Kinobeads	FLT3	1	1.2625	1.06442	0.938199	0.702039	0	0	0	0	10063000	Normalized LFQ intensity	3.61421	-0.00861537	1.0694	118.973	118.973	21.4523	0.537356	63.9306	0.975184	-8.79178	High confidence
AT-9283	4 cell line mix	Kinobeads	FYN	1	1.16672	1.12085	1.05852	0.798926	0.920499	0.65682	0.487171	0.263276	204240000	Normalized LFQ intensity	0.686587	0.172727	1.09571	1186.58	1186.58	1046.63	0.431007	511.425	0.931742	-9.9143	High confidence
AT-9283	4 cell line mix	Kinobeads	GAK	1	1.08896	1.04279	1.0902	0.742066	1.0604	0.857682	0.632744	0.341514	521090000	Normalized LFQ intensity	1.14102	0.292495	1.01597	2866.72	2866.72	4517.45	0.56156	1609.83	0.833061	-5.04822	High confidence
AT-9283	4 cell line mix	Kinobeads	GRB2	1	1.0424	0.785013	0.862928	0.616151	0.687689	0.534094	0.547033	0	25626000	Normalized LFQ intensity	0.454567	-0.0718881	0.986265	1671.48	1671.48	2849.05	0.623754	1042.59	0.879181	-4.46491	High confidence
AT-9283	4 cell line mix	Kinobeads	GRK6	1	1.23353	1.15358	1.11744	1.09953	1.85229	1.42256	2.10545	0	3083700	Normalized LFQ intensity	5.94512	-0.00276114	1.37304	13552.2	13552.2	73725.5	1.0269	13552.2	0.600244	17.7383	Low confidence
AT-9283	4 cell line mix	Kinobeads	GSK3A	1	0.977564	0.571157	0.262081	0.0685348	0.0521838	0.0143322	0.00804496	0.042267	515430000	Normalized LFQ intensity	1.54235	0.0301862	1.0287	12.3449	12.3449	1.2615	0.500216	6.1751	0.99497	-28.0952	High confidence
AT-9283	4 cell line mix	Kinobeads	GSK3B	1	1.00789	0.659694	0.294924	0.103279	0.0754603	0.0324948	0.0123927	0.041161	738770000	Normalized LFQ intensity	1.58344	0.0419121	1.03178	14.8062	14.8062	1.40489	0.464999	6.88488	0.995656	-29.1702	High confidence
AT-9283	4 cell line mix	Kinobeads	HCK	1	1.17579	1.05152	1.10542	0.767381	0.989041	0.662105	0.425171	0.226029	238600000	Normalized LFQ intensity	0.839397	0.154482	1.07243	1281.47	1281.47	1017.46	0.518348	664.249	0.903846	-5.69243	High confidence
AT-9283	4 cell line mix	Kinobeads	IKBKE	1	1.05076	1.16338	1.04937	0.588202	0.524598	0.366789	0.382502	0	18289000	Normalized LFQ intensity	0.640566	-0.00110238	1.112	346.845	346.845	518.174	0.620827	215.331	0.908887	-2.50645	High confidence
AT-9283	4 cell line mix	Kinobeads	INCENP	1	0.95468	0.732051	0	0	0	0	0	0	10955000	Normalized LFQ intensity	5.94743	-0.00102377	0.977495	12.0192	12.0192	1.01774	0.892521	10.7274	0.999373	-45.1435	High confidence
AT-9283	4 cell line mix	Kinobeads	INPPL1	1	1.36383	2.26557	1.25839	0.980627	0.836969	0.872841	0.707852	0	8586100	Normalized LFQ intensity	0.605161	-0.213234	1.44218	2276.41	2276.41	8390.24	0.483409	1100.44	0.612836	17.8566	High confidence
AT-9283	4 cell line mix	Kinobeads	JAK1	1	1.14424	0.85065	1.0088	0.602354	0.710394	0.544619	0.312213	0.0952647	50196000	Normalized LFQ intensity	0.50093	-0.0755018	1.05813	987.565	987.565	1624.19	0.372562	367.929	0.906485	-4.98763	High confidence
AT-9283	4 cell line mix	Kinobeads	KLHL6	1	0.891708	0.870585	0.610183	0.580931	0.188112	0.111592	0.11904	0.100989	17185000	Normalized Intensity	0.897696	0.0699099	0.973261	71.935	71.935	29.0162	0.740829	53.2915	0.970098	-13.8822	High confidence
AT-9283	4 cell line mix	Kinobeads	LATS1	1	1.0355	1.05828	0.855264	0.288262	0.318777	0.10522	0.106989	0	35858000	Normalized LFQ intensity	1.96634	0.111992	1.04353	57.0065	57.0065	14.9458	0.787536	44.8947	0.969035	-10.2661	High confidence
AT-9283	4 cell line mix	Kinobeads	LCK	1	0.997435	1.08712	1.1458	0.740364	0.980354	0.751459	0.585373	0.363683	566630000	Normalized LFQ intensity	0.730174	0.267053	1.03842	2020.04	2020.04	3025.36	0.440511	889.849	0.84095	-5.45435	High confidence
AT-9283	4 cell line mix	Kinobeads	LIMK1	1	1.0985	1.1088	0.989126	0.677286	0.829963	0.781254	0.39691	0	18062000	Normalized LFQ intensity	0.671275	-0.155919	1.03537	2844.77	2844.77	2994.69	0.594601	1691.5	0.906643	-3.99978	High confidence
AT-9283	4 cell line mix	Kinobeads	LIMK2	1	1.1301	1.11156	1.16998	0.76988	1.07494	0.924836	0.728284	0.296162	47396000	Normalized LFQ intensity	0.8381	0.0807359	1.06466	6686.14	6686.14	15517.1	0.662896	4432.21	0.83498	-3.74216	High confidence
AT-9283	4 cell line mix	Kinobeads	LYN	1	1.04433	1.11356	1.17484	0.789185	0.997133	0.832366	0.638298	0.390393	692030000	Normalized LFQ intensity	0.735997	0.269642	1.06008	2828.43	2828.43	4684.73	0.501873	1419.51	0.848173	-6.36439	High confidence
AT-9283	4 cell line mix	Kinobeads	MAP2K5	1	1.0958	0.965772	0.714428	0.306258	0.293711	0.14338	0.0150607	0	80327000	Normalized LFQ intensity	1.09865	0.0497074	1.0733	53.5333	53.5333	17.212	0.875759	46.8822	0.975797	-12.736	High confidence
AT-9283	4 cell line mix	Kinobeads	MAP2K6	1	1.22052	1.01226	1.18042	0.737803	1.25398	0.908144	0.790923	0.448796	80453000	Normalized LFQ intensity	1.37167	0.417778	1.06407	3544.81	3544.81	5334.02	1.00798	3544.81	0.64155	2.11059	High confidence
AT-9283	4 cell line mix	Kinobeads	MAP3K1	1	1.21374	1.14517	1.18007	0.67883	0.88386	0.765676	0.508172	0.204355	162710000	Normalized LFQ intensity	0.549997	-0.0200677	1.12978	2423.92	2423.92	5518.06	0.577183	1399.04	0.84731	-0.896942	High confidence
AT-9283	4 cell line mix	Kinobeads	MAP3K11	1	1.17408	1.08185	0.812643	0.315957	0.480133	0	0	0	12858000	Normalized LFQ intensity	1.00006	-0.00117604	1.12333	79.9169	79.9169	49.6711	0.696515	55.6634	0.931287	-1.52362	High confidence
AT-9283	4 cell line mix	Kinobeads	MAP3K2	1	1.20671	1.17573	1.16392	0.703623	0.660213	0.381144	0.245678	0	68478000	Normalized LFQ intensity	0.802383	-0.0012467	1.1577	397.401	397.401	269.266	0.698286	277.5	0.945432	-5.29601	High confidence
AT-9283	4 cell line mix	Kinobeads	MAP3K3	1	1.26528	1.23251	1.13023	0.836426	0.706949	0.473126	0	0	12456000	Normalized LFQ intensity	0.956602	-0.0695155	1.16578	514.398	514.398	250.574	0.67104	345.182	0.951021	-4.54711	High confidence
AT-9283	4 cell line mix	Kinobeads	MAP3K5	1	1.19701	1.34277	1.03447	0.593849	0.94757	0.909578	0.703994	0.261614	28639000	Normalized LFQ intensity	0.432633	-0.540447	1.12138	28947.3	28947.3	164638	0.800358	23168.2	0.68333	4.97252	High confidence
AT-9283	4 cell line mix	Kinobeads	MAP4K1	1	1.0556	0.944395	1.08341	0.694395	0.821082	0.594291	0.508713	0.453742	6393400	Normalized LFQ intensity	0.782958	0.436227	1.03382	294.944	294.944	291.435	0.726208	214.191	0.87762	-9.04627	High confidence
AT-9283	4 cell line mix	Kinobeads	MAP4K4	1	1.37021	1.41678	1.44194	0.865556	0	0	0	0	4024100	Normalized LFQ intensity	9.17365	-0.000715851	1.30723	107.619	107.619	95.4129	1.01351	107.619	0.964165	-1.71382	High confidence
AT-9283	4 cell line mix	Kinobeads	MAP4K5	1	1.13365	1.1311	1.20134	0.77804	1.08663	1.02884	0.721023	0.393933	214860000	Normalized LFQ intensity	2.91696	0.393235	1.05526	2979.34	2979.34	1063.35	0.744124	2217	0.791553	-2.7796	High confidence
AT-9283	4 cell line mix	Kinobeads	MAPK10	1	1.09226	1.54844	1.31975	0.765638	0.912642	0	0	0	131720000	Normalized LFQ intensity	3.43753	-0.0195842	1.15116	425.379	425.379	222.578	0.840483	357.523	0.874436	7.51792	High confidence
AT-9283	4 cell line mix	Kinobeads	MAPK8	1	1.27069	1.06579	1.10176	0.624844	0.684265	0.412857	0.231909	0.147481	347010000	Normalized LFQ intensity	0.821172	0.139444	1.14507	243.036	243.036	187.174	0.648022	157.493	0.922124	-3.74188	High confidence
AT-9283	4 cell line mix	Kinobeads	MAPK9	1	1.15142	1.13665	1.32572	0.656082	0.866885	0.666182	0.397552	0.237235	117170000	Normalized LFQ intensity	0.753277	0.185068	1.13228	726.928	726.928	974.608	0.699871	508.756	0.818427	1.99508	High confidence
AT-9283	4 cell line mix	Kinobeads	MAPKAPK5	1	0.797139	0.790868	0.357215	0.547421	0.62042	0.285154	0.251811	0.102093	14192000	Normalized Intensity	0.256174	-0.235335	1.00595	634.029	634.029	4428.5	0.929367	589.246	0.839928	-2.70551	High confidence
AT-9283	4 cell line mix	Kinobeads	MARK2	1	1.29743	1.17627	1.22626	0.858162	0.999783	0.753973	0.524852	0.212587	312270000	Normalized LFQ intensity	0.736989	0.0932986	1.16371	1810.24	1810.24	1972.02	0.753322	1363.7	0.897691	-3.79523	High confidence
AT-9283	4 cell line mix	Kinobeads	MARK3	1	1.12791	1.00543	1.2671	0.739985	0.978038	0.650946	0.42262	0.100575	66251000	Normalized LFQ intensity	0.821079	0.00345109	1.07577	1776.82	1776.82	1875.05	0.770892	1369.74	0.877475	-1.3173	High confidence
AT-9283	4 cell line mix	Kinobeads	MELK	1	1.0589	0.970336	0.955719	0.881238	0.721782	0.52137	0.407095	0	16824000	Normalized LFQ intensity	0.605319	-0.177874	1.03393	2030.76	2030.76	889.066	0.883754	1794.69	0.991205	-25.912	High confidence
AT-9283	4 cell line mix	Kinobeads	MET	1	0.701588	0.41211	0.305015	0.333067	0.271654	0	0.367054	0	4634200	Normalized Intensity	0.337717	-0.000944509	1.01013	8.22362	8.22362	NA	0.803492	6.60761	0.848257	-2.25699	High confidence
AT-9283	4 cell line mix	Kinobeads	MOB1A;MOB1B	1	1.0319	0.813867	0.847087	0.377974	0.452484	0.26328	0.277719	0	6391500	Normalized LFQ intensity	0.596256	0.0419565	1.05042	113.01	113.01	121.341	0.914475	103.345	0.926908	-6.02411	High confidence
AT-9283	4 cell line mix	Kinobeads	MYLK3	1	0.815424	0.819987	0.601972	0.536696	0.460169	0	0	0	3044900	Normalized LFQ intensity	0.654132	-0.0864633	0.949178	148.624	148.624	98.9862	0.870308	129.348	0.949453	-8.41564	High confidence
AT-9283	4 cell line mix	Kinobeads	NEK3	1	1.27943	1.3947	1.46063	0.989709	1.26515	1.24979	0.572357	0.377719	25694000	Normalized LFQ intensity	5.45608	0.376781	1.23514	2403.73	2403.73	1372.81	0.854721	2054.52	0.824224	2.04727	High confidence
AT-9283	4 cell line mix	Kinobeads	NEK9	1	1.06057	1.05805	1.05161	0.783874	1.30342	0.934474	0.68317	0.192011	1497800000	Normalized LFQ intensity	2.12441	0.184547	1.03702	3472.19	3472.19	1729.06	0.441168	1531.82	0.82445	-0.810645	High confidence
AT-9283	4 cell line mix	Kinobeads	PAK4	1	1.15973	1.08584	0.991566	0.637294	0.538612	0.308863	0.170059	0.0958792	403120000	Normalized LFQ intensity	0.920697	0.105699	1.10655	183.272	183.272	70.9628	0.600921	110.132	0.974055	-13.3919	High confidence
AT-9283	4 cell line mix	Kinobeads	PAK6	1	2.14709	2.01718	0.873953	1.09313	0.936285	0.280834	0	0	1373300	Normalized Intensity	0.923819	-0.0798425	1.59885	286.269	286.269	389.782	0.744928	213.25	0.73775	18.9151	High confidence
AT-9283	4 cell line mix	Kinobeads	PDPK1;PDPK2P	1	1.15829	1.07536	0.875833	0.510929	0	0	0	0	12716000	Normalized LFQ intensity	1.87773	-0.020175	1.07005	87.914	87.914	14.9307	1.04203	87.914	0.987145	-15.5275	High confidence
AT-9283	4 cell line mix	Kinobeads	PKN1	1	1.2625	1.18129	1.27391	0.821616	1.21799	1.17761	0.890827	0.383648	84651000	Normalized LFQ intensity	4.51692	0.382804	1.13401	3532.9	3532.9	2115.19	0.874092	3088.08	0.758312	0.428677	High confidence
AT-9283	4 cell line mix	Kinobeads	PKN2	1	1.12155	1.14276	1.24878	0.780442	1.08326	0.883757	0.674586	0.352807	20380000	Normalized LFQ intensity	0.841512	0.236389	1.09137	3390.65	3390.65	5826.51	0.815959	2766.63	0.804999	-2.06048	High confidence
AT-9283	4 cell line mix	Kinobeads	PLK4	1	1.11914	1.03876	0.929124	0	0	0	0	0	8630500	Normalized LFQ intensity	6.4665	-0.00111654	1.05269	40.9881	40.9881	16.7537	0.509269	20.874	0.996839	-27.4144	High confidence
AT-9283	4 cell line mix	Kinobeads	PRKAA1	1	0.986645	1.06881	0.897458	0.445932	0.421708	0.281066	0.191123	0.112959	643680000	Normalized LFQ intensity	1.30644	0.194672	1.04019	79.1373	79.1373	32.4133	0.637811	50.4746	0.962955	-11.4238	High confidence
AT-9283	4 cell line mix	Kinobeads	PRKAB1	1	1.06718	0.930326	0.782572	0.388535	0.438826	0.244156	0.158647	0.117902	466090000	Normalized LFQ intensity	0.935217	0.154302	1.05743	62.8929	62.8929	27.0205	0.662068	41.6394	0.966612	-12.6883	High confidence
AT-9283	4 cell line mix	Kinobeads	PRKAB2	1	1.14408	0.874273	0.618777	0.26933	0.367936	0.238712	0.23609	0	53885000	Normalized LFQ intensity	1.3538	0.187131	1.07838	28.2715	28.2715	12.4471	0.601053	16.9927	0.93562	-5.77847	High confidence
AT-9283	4 cell line mix	Kinobeads	PRKACA	1	1.05157	1.13494	1.14482	0.756189	1.00914	0.863469	0.750029	0.332393	271880000	Normalized LFQ intensity	0.710746	0.104065	1.04969	6788.04	6788.04	11350.3	0.470095	3191.03	0.827178	-4.82374	High confidence
AT-9283	4 cell line mix	Kinobeads	PRKACB	1	1.1046	1.14008	1.03663	0.688375	0.906358	0.662256	0.476408	0.200041	54852000	Normalized LFQ intensity	0.56523	0.0139544	1.08202	1960.84	1960.84	3296.75	0.472983	927.442	0.895911	-5.4869	High confidence
AT-9283	4 cell line mix	Kinobeads	PRKACG	1	0.695993	0.324422	0.169055	0	0.209266	0.0640597	0	0	17095000	Normalized Intensity	1.29046	0.0522132	1.00181	5.2159	5.2159	1.46231	0.513401	2.67785	0.964764	-13.4295	High confidence
AT-9283	4 cell line mix	Kinobeads	PRKAG1	1	1.07235	0.961318	0.744424	0.397647	0.418367	0.26308	0.191428	0.11733	1060500000	Normalized LFQ intensity	1.01643	0.182502	1.06235	53.8724	53.8724	20.7489	0.632872	34.0943	0.970267	-13.9013	High confidence
AT-9283	4 cell line mix	Kinobeads	PRKAG2	1	1.11353	0.795503	0.881815	0.347527	0.361199	0.299235	0	0	14764000	Normalized LFQ intensity	0.738107	-0.00109591	1.0657	95.7839	95.7839	76.9457	0.644818	61.7632	0.925712	-3.41192	High confidence
AT-9283	4 cell line mix	Kinobeads	PRKCA	1	1.17319	1.37469	1.26337	0.970176	1.32308	0.874235	0.588289	0.20305	56982000	Normalized LFQ intensity	1.52056	0.19287	1.18551	2118.84	2118.84	1205.11	0.728153	1542.84	0.862408	0.233505	High confidence
AT-9283	4 cell line mix	Kinobeads	PRKCB	1	1.18051	1.19127	1.1181	0.99491	1.39532	0.990226	0.889589	0.43044	225840000	Normalized LFQ intensity	1.64161	0.404485	1.13706	4235.48	4235.48	3713.73	0.797918	3379.57	0.785401	-2.12525	High confidence
AT-9283	4 cell line mix	Kinobeads	PRKD2	1	1.18192	1.13042	1.10363	0.532882	0.849948	0.213657	0.0832913	0.0171518	107960000	Normalized LFQ intensity	0.887716	-0.0382517	1.11362	369.962	369.962	301.618	0.659146	243.859	0.886497	2.45916	High confidence
AT-9283	4 cell line mix	Kinobeads	PRKD3	1	1.2715	1.10539	1.37123	0.89246	0.894255	0.420682	0.295337	0	33214000	Normalized LFQ intensity	1.01556	-0.000863954	1.17631	718.233	718.233	454.39	0.740225	531.654	0.921231	-1.14659	High confidence
AT-9283	4 cell line mix	Kinobeads	PRKX;PRKY	1	1.33676	1.05394	1.13481	0.828556	0.870053	0.68822	0	0	8012100	Normalized LFQ intensity	2.97301	-0.0276089	1.04238	1228.45	1228.45	388.119	0.812178	997.717	0.905159	0.810591	High confidence
AT-9283	4 cell line mix	Kinobeads	PTK6	1	1.12805	1.26985	0.942319	0.562188	0.554591	0.455067	0.446096	0	10929000	Normalized LFQ intensity	0.564849	-0.00147332	1.14659	388.755	388.755	867.652	0.483081	187.8	0.863687	1.25316	High confidence
AT-9283	4 cell line mix	Kinobeads	Q6ZSR9	1	1.20143	0.919691	0.623583	0.233653	0.287834	0	0.239752	0	37722000	Normalized LFQ intensity	1.49631	0.114605	1.10034	31.3653	31.3653	12.0713	0.761466	23.8836	0.943503	-4.78435	High confidence
AT-9283	4 cell line mix	Kinobeads	RET	1	1.08856	0.694953	0.529303	0.102989	0.0968135	0	0	0	87521000	Normalized LFQ intensity	1.24354	0.00134515	1.05054	24.6998	24.6998	6.41798	0.440569	10.882	0.978529	-13.6038	High confidence
AT-9283	4 cell line mix	Kinobeads	RPS6KA1	1	1.17685	1.1408	1.20688	0.738977	0.86655	0.589387	0.386262	0.230232	976850000	Normalized LFQ intensity	0.804436	0.191918	1.12653	626.825	626.825	531.993	0.751989	471.365	0.903402	-4.19338	High confidence
AT-9283	4 cell line mix	Kinobeads	RPS6KA3	1	1.11745	1.09379	1.04207	0.574892	0.538805	0.354392	0.202654	0.141071	371590000	Normalized LFQ intensity	0.993061	0.172893	1.10103	148.367	148.367	76.2279	0.724844	107.543	0.955643	-9.27139	High confidence
AT-9283	4 cell line mix	Kinobeads	RPS6KA4	1	1.14839	1.09256	1.09339	0.506357	0.426922	0.214434	0.0981555	0.0354252	109170000	Normalized LFQ intensity	1.24706	0.0932647	1.11587	118.745	118.745	51.5464	0.617388	73.3118	0.958045	-7.01494	High confidence
AT-9283	4 cell line mix	Kinobeads	RPS6KA5	1	1.32022	1.21824	1.33072	0.823399	1.20496	0.8745	0.745917	0.510188	16142000	Normalized LFQ intensity	0.83766	0.446206	1.18253	1847.03	1847.03	3230.28	0.676383	1249.3	0.694505	2.24227	High confidence
AT-9283	4 cell line mix	Kinobeads	RPS6KA6	1	1.08685	0.941697	0.702934	0.185074	0.221492	0.15164	0.0815323	0.0378005	112390000	Normalized LFQ intensity	2.07638	0.112477	1.03236	38.1431	38.1431	6.2903	0.421785	16.0882	0.983577	-16.4815	High confidence
AT-9283	4 cell line mix	Kinobeads	RPS6KB1	1	1.04311	1.07784	0.907056	0.875178	0	0	0	0	12209000	Normalized LFQ intensity	6.83542	-0.00146798	1.00706	131.91	131.91	76.8262	0.890655	117.486	0.99245	-20.2628	High confidence
AT-9283	4 cell line mix	Kinobeads	SIK2	1	0.915636	0.944716	0.773992	0.31883	0.206672	0.146442	0.107212	0.0263884	62128000	Normalized LFQ intensity	1.68817	0.101088	0.97132	58.4225	58.4225	9.30907	0.518256	30.2778	0.988741	-21.1445	High confidence
AT-9283	4 cell line mix	Kinobeads	SIK3	1	1.42639	1.10251	1.23299	0.875872	1.05292	0.970401	0.956997	0	15035000	Normalized LFQ intensity	3.67581	-0.00127563	1.09549	5018.08	5018.08	NA	0.818608	4107.84	0.838119	2.38184	High confidence
AT-9283	4 cell line mix	Kinobeads	SLK	1	1.21699	1.19103	1.32876	0.762446	0.805459	0.472516	0.274506	0.132011	272060000	Normalized LFQ intensity	0.959138	0.125144	1.17339	451.191	451.191	325.869	0.890695	401.873	0.908954	-1.30305	High confidence
AT-9283	4 cell line mix	Kinobeads	SRC	1	1.05963	1.12154	1.16937	0.751061	0.993662	0.734388	0.470282	0.265762	805820000	Normalized LFQ intensity	0.895672	0.200594	1.06059	1524.02	1524.02	1314.89	0.388259	591.716	0.87637	-4.40628	High confidence
AT-9283	4 cell line mix	Kinobeads	STK10	1	1.20499	1.26804	1.31081	0.453447	0.381139	0.133285	0.0683694	0.0240493	139700000	Normalized LFQ intensity	8.16548	0.150857	1.19594	89.5968	89.5968	69.3427	0.915468	82.0231	0.943535	-1.39805	High confidence
AT-9283	4 cell line mix	Kinobeads	STK16	1	0.977128	0.982536	0.812495	0.587205	0.772671	0.464333	0.509076	0	16474000	Normalized LFQ intensity	0.467507	-0.128389	1.00206	1778.57	1778.57	2831.99	0.720023	1280.61	0.89707	-5.1205	High confidence
AT-9283	4 cell line mix	Kinobeads	SYK	1	1.0303	1.07141	0.990465	0.526639	0.493343	0.282573	0.155045	0.103762	460520000	Normalized LFQ intensity	1.01492	0.130114	1.06407	138.322	138.322	61.5877	0.838521	115.986	0.963577	-10.8783	High confidence
AT-9283	4 cell line mix	Kinobeads	TANK	1	1.08294	1.05245	1.11293	0.516503	0.560008	0.313744	0.145512	0.0605906	114270000	Normalized LFQ intensity	0.913661	0.079381	1.08913	194.383	194.383	132.273	0.63618	123.662	0.932249	-4.27445	High confidence
AT-9283	4 cell line mix	Kinobeads	TAOK1	1	0.973649	1.04937	1.15734	0.750371	1.02007	1.01912	0.674505	0.15508	13097000	Normalized LFQ intensity	4.52595	0.154982	0.996283	3337.4	3337.4	1108.6	0.664809	2218.73	0.878746	-4.81779	High confidence
AT-9283	4 cell line mix	Kinobeads	TBK1	1	1.16217	1.10006	1.09599	0.573425	0.542637	0.333322	0.181534	0.103598	669540000	Normalized LFQ intensity	1.00022	0.13945	1.12238	159.931	159.931	89.8791	0.639531	102.281	0.947515	-6.64617	High confidence
AT-9283	4 cell line mix	Kinobeads	TBKBP1	1	1.04013	0.977292	1.13616	0.590284	0.597426	0.499792	0	0	12688000	Normalized LFQ intensity	0.786045	-0.0734474	1.04842	486.599	486.599	396.384	0.793595	386.162	0.909225	-1.24095	High confidence
AT-9283	4 cell line mix	Kinobeads	TEC	1	1.07811	1.08863	1.0225	0.621206	0.673244	0.436681	0.267959	0.126903	207910000	Normalized LFQ intensity	0.732789	0.106386	1.08165	335.028	335.028	229.298	0.402382	134.809	0.948612	-9.27604	High confidence
AT-9283	4 cell line mix	Kinobeads	TGFBR1	1	1.24362	0.875186	1.00245	0.557643	0.422851	0.181495	0.199843	0.0871429	102850000	Normalized LFQ intensity	1.07069	0.123471	1.08911	111.574	111.574	55.3826	0.693169	77.3398	0.942113	-5.60833	High confidence
AT-9283	4 cell line mix	Kinobeads	TGFBR2	1	0.996961	1.2147	0.857615	0.599404	0.829659	0.578375	0.448675	0	5105900	Normalized LFQ intensity	0.552002	-0.119497	1.04011	1839.77	1839.77	2958.87	0.752316	1384.09	0.861488	-0.538661	High confidence
AT-9283	4 cell line mix	Kinobeads	TNIK	1	1.24689	1.15128	1.18579	0.835594	0.9579	0.676544	0.422082	0.304473	20557000	Normalized LFQ intensity	0.898814	0.257749	1.13577	800.594	800.594	561.977	1.02305	800.594	0.907071	-5.53661	High confidence
AT-9283	4 cell line mix	Kinobeads	TYK2	1	1.19823	1.20401	1.23919	0.746681	0.657395	0.571517	0	0	12861000	Normalized LFQ intensity	0.883235	-0.0671661	1.15787	534.307	534.307	384.004	0.521407	278.591	0.914609	0.251874	High confidence
AT-9283	4 cell line mix	Kinobeads	U2AF1;U2AF1L4	1	1.35416	1.38559	1.37969	1.02639	0.807787	0.527303	0.456329	0	20544000	Normalized LFQ intensity	0.826272	-0.0013807	1.28324	793.894	793.894	750.852	0.829176	658.278	0.907154	0.894716	High confidence
AT-9283	4 cell line mix	Kinobeads	ULK3	1	1.15802	0.990099	0.92926	0.473659	0.464518	0.312668	0.223702	0.0689532	174320000	Normalized LFQ intensity	0.90284	0.146417	1.09849	99.014	99.014	58.1304	0.453962	44.9486	0.951148	-8.28849	High confidence
AT-9283	4 cell line mix	Kinobeads	YES1	1	1.03139	0.971499	0.974136	0.584523	0.743317	0.491384	0.298597	0	100060000	Normalized LFQ intensity	0.521243	-0.193305	1.03758	1389.84	1389.84	1775.16	0.41317	574.243	0.94276	-8.52039	High confidence
AV-412	4 cell line mix	Kinobeads	BTK	1	1.03709	1.15964	0.735724	0.883329	0.546843	0.613613	0.364062	0.13161	1160800000	Normalized LFQ intensity	0.527416	0.00190686	1.06308	882.466	882.466	1541.39	0.390881	344.939	0.886537	-3.65034	High confidence
AV-412	4 cell line mix	Kinobeads	EGFR	1	0.781551	0.674829	0	0	0	0	0	0	6766100	Normalized LFQ intensity	5.22426	-0.00104267	0.891329	12.4236	12.4236	4.11535	0.793047	9.85251	0.982941	-16.8866	High confidence
AV-412	4 cell line mix	Kinobeads	MAP3K1	1	0.857483	0.95675	0.672379	0.708788	0.47797	0.617205	0.497941	0.0676101	108080000	Normalized LFQ intensity	0.298722	-0.554596	0.995949	13790.6	13790.6	38580.6	0.577183	7959.67	0.88725	-6.67785	High confidence
AV-412	4 cell line mix	Kinobeads	SLK	1	0.857564	0.956939	0.67242	0.786699	0.534814	0.768025	0.647326	0.297096	165290000	Normalized LFQ intensity	0.265522	-0.1368	0.989552	15063	15063	58978	0.890695	13416.6	0.747823	-4.33782	High confidence
AV-412	4 cell line mix	Kinobeads	STK10	1	0.879982	1.1013	0.672431	0.811759	0.520703	0.703094	0.551602	0.0890223	125630000	Normalized LFQ intensity	0.341666	-0.726817	0.994274	31287.8	31287.8	131496	0.915468	28643	0.813937	-1.28893	High confidence
AV-412	4 cell line mix	Kinobeads	TEC	1	1.10238	1.206	0.852673	0.964115	0.568442	0.69982	0.58405	0.261663	164070000	Normalized LFQ intensity	0.519131	0.159318	1.09767	1047.69	1047.69	2723.17	0.402382	421.57	0.832722	-2.22398	High confidence
AV-412	4 cell line mix	Kinobeads	YES1	1	1.04459	1.29408	0.873397	1.08426	0.548566	0.82533	0.997844	0.49389	42607000	Normalized LFQ intensity	0.382202	0.160178	1.07644	15169	15169	121759	0.41317	6267.39	0.421354	6.01243	High confidence
Axitinib	4 cell line mix	Kinobeads	AAK1	1	1.04984	1.24127	1.00695	1.08306	1.04469	0.870107	0.596468	0.118392	974100000	Normalized LFQ intensity	1.22949	0.0580684	1.08126	3208.22	3208.22	1424.89	0.673073	2159.36	0.95724	-12.3889	High confidence
Axitinib	4 cell line mix	Kinobeads	ABL1	1	0.88873	1.16072	0.948825	0.946791	0.791193	0.620767	0.463057	0.157978	581900000	Normalized LFQ intensity	0.781579	0.0766784	1.01511	1652.78	1652.78	1266.48	0.547922	905.597	0.943024	-11.3381	High confidence
Axitinib	4 cell line mix	Kinobeads	ABL2	1	0.926879	1.2013	1.05766	1.02964	1.00424	0.766542	0.617337	0.189566	542750000	Normalized LFQ intensity	0.991651	0.10333	1.05275	3136.7	3136.7	2203.45	0.331378	1039.43	0.937229	-10.7996	High confidence
Axitinib	4 cell line mix	Kinobeads	AP2A1	1	1.08979	1.16014	0.995286	1.17595	1.16391	1.02904	0.737785	0.55635	64848000	Normalized LFQ intensity	2.5447	0.556226	1.09675	2281.8	2281.8	718.042	0.918545	2095.94	0.901874	-13.4105	High confidence
Axitinib	4 cell line mix	Kinobeads	AURKA	1	0.995156	1.11487	0.840601	0.931417	0.882444	0.569853	0.408015	0.210474	635970000	Normalized LFQ intensity	1.03787	0.187978	1.0011	1056.44	1056.44	494.49	0.353704	373.666	0.948267	-12.4883	High confidence
Axitinib	4 cell line mix	Kinobeads	AURKB	1	0.88834	1.04696	0.775706	0.723276	0.550708	0.331843	0.235999	0	143700000	Normalized LFQ intensity	0.685703	-0.00108708	0.992846	403.425	403.425	208.002	0.585272	236.113	0.970894	-14.6125	High confidence
Axitinib	4 cell line mix	Kinobeads	BCR	1	1.18568	1.37201	1.0327	0.967857	0.657552	0.38123	0.186957	0.043245	119900000	Normalized LFQ intensity	1.05143	0.0518886	1.17173	393.765	393.765	191.612	0.477847	188.159	0.949592	-5.219	High confidence
Axitinib	4 cell line mix	Kinobeads	BMP2K	1	0.910412	1.14877	1.02017	1.01475	0.97785	0.757165	0.579315	0.128102	570300000	Normalized LFQ intensity	1.00873	0.0325624	1.02752	3363.91	3363.91	1999.33	0.660952	2223.38	0.957948	-13.8954	High confidence
Axitinib	4 cell line mix	Kinobeads	FECH	1	1.07493	1.2687	1.09152	1.19597	1.19122	0.952054	0.865892	0.244212	615350000	Normalized LFQ intensity	1.15098	0.0834482	1.13399	6874.55	6874.55	8406.32	0.994935	6839.73	0.919728	-8.52408	High confidence
Axitinib	4 cell line mix	Kinobeads	FGFR1	1	0.839413	0.838624	0.95735	1.17712	0.862175	0	0	0	4092700	Normalized LFQ intensity	11.2389	-0.000728182	0.962501	363.302	363.302	1901.54	0.736349	267.517	0.958413	-6.20852	High confidence
Axitinib	4 cell line mix	Kinobeads	FGR	1	0.812606	0.698294	0.722309	0.685869	0.528205	0.463391	0.39451	0.253925	49900000	Normalized LFQ intensity	0.250021	-0.106556	0.997463	1530.52	1530.52	3851.79	0.419542	642.117	0.980558	-26.5142	High confidence
Axitinib	4 cell line mix	Kinobeads	INCENP	1	0.832279	1.11728	0.697012	0.68543	0.655309	0.376702	0	0	38777000	Normalized LFQ intensity	0.867256	-0.0540488	0.941036	542.068	542.068	398.79	0.892521	483.807	0.907169	-2.48241	High confidence
Axitinib	4 cell line mix	Kinobeads	INPPL1	1	1.42938	1.36094	0	1.02301	0	0	0	0	8157200	Normalized LFQ intensity	0.947489	-0.00141753	1.24914	46.4806	46.4806	94.9255	0.483409	22.4691	0.632589	18.6684	High confidence
Axitinib	4 cell line mix	Kinobeads	MAP4K4	1	0.934956	0.90847	1.01871	1.03129	0.884387	0.753603	0.673515	0.464046	16346000	Normalized LFQ intensity	1.01292	0.442233	0.979624	1812.11	1812.11	1087.12	1.01351	1812.11	0.936431	-19.3458	High confidence
Axitinib	4 cell line mix	Kinobeads	MAP4K5	1	0.971016	1.17368	0.933035	1.15805	1.11492	1.06563	0.799984	0.229519	531020000	Normalized LFQ intensity	3.8672	0.230008	1.06016	3675.08	3675.08	1918.6	0.744124	2734.72	0.921302	-9.63125	High confidence
Axitinib	4 cell line mix	Kinobeads	MYLK3	1	1.54019	1.20949	1.29461	1.49001	1.47803	1.28339	0.985562	0	3451900	Normalized LFQ intensity	2.58401	-0.00156621	1.33223	4485.54	4485.54	4123.34	0.870308	3903.81	0.878614	3.00899	High confidence
Axitinib	4 cell line mix	Kinobeads	PDGFRB	1	1.51004	1.38984	1.32131	1.01879	1.18059	0	0	0	8240500	Normalized LFQ intensity	6.56029	-0.00153448	1.24833	462.051	462.051	577.311	0.873974	403.821	0.936345	2.62971	High confidence
Axitinib	4 cell line mix	Kinobeads	PLK4	1	1.15406	1.31463	1.24469	1.25378	1.01309	0.630934	0.438532	0	23575000	Normalized LFQ intensity	1.12791	-0.00130761	1.20055	1416.61	1416.61	680.696	0.509269	721.436	0.945544	-5.22086	High confidence
Axitinib	4 cell line mix	Kinobeads	Q6ZSR9	1	1.00538	1.15771	1.05493	1.09311	1.01506	0.823538	0.561603	0	148950000	Normalized LFQ intensity	1.32774	-0.00164738	1.06139	3019.02	3019.02	721.976	0.761466	2298.88	0.978917	-17.3255	High confidence
Axitinib	4 cell line mix	Kinobeads	RET	1	1.24178	1.47538	1.15478	0.832823	0.534113	0.343722	0.107325	0	238520000	Normalized LFQ intensity	1.09867	0.0411356	1.24134	239.048	239.048	142.942	0.440569	105.317	0.931465	-0.324766	High confidence
Axitinib	4 cell line mix	Kinobeads	SLK	1	1.00446	1.21568	1.00458	1.1327	0.990637	0.929837	0.866292	0.28945	1019500000	Normalized LFQ intensity	1.22005	0.176346	1.06014	6691.68	6691.68	5490.77	0.890695	5960.25	0.914692	-10.6794	High confidence
Axitinib	4 cell line mix	Kinobeads	STK10	1	1.0022	1.32368	1.09889	1.17231	1.1042	0.914847	0.61305	0.129309	438200000	Normalized LFQ intensity	1.40449	0.0926839	1.12261	2963.87	2963.87	1342.11	0.915468	2713.33	0.926682	-6.54709	High confidence
Axitinib	4 cell line mix	Kinobeads	TNIK	1	2.47788	2.94902	2.20768	3.68884	1.77105	1.648	0.814645	0	2683500	Normalized Intensity	1.44186	-0.00343413	2.38881	1770.04	1770.04	2231.02	1.02305	1770.04	0.587954	29.8265	High confidence
Axitinib	4 cell line mix	Kinobeads	TNK1	1	0.720348	1.16504	0.767581	1.08986	1.26912	0.760165	0.711809	0.199934	53436000	Normalized LFQ intensity	1.46826	0.157569	0.986686	4321.96	4321.96	5703.92	0.432597	1869.67	0.671825	5.02737	Low confidence
Axitinib	4 cell line mix	Kinobeads	ZAK	1	0.978445	1.08058	1.11122	1.10517	1.03992	0.95897	0.82146	0.31267	121950000	Normalized LFQ intensity	1.26699	0.212752	1.05423	6206.43	6206.43	4532.48	0.743597	4615.08	0.967433	-20.323	High confidence
AXL-1717	4 cell line mix	Kinobeads	TOP2A	1	1.64511	1.72076	1.33217	1.02055	0.548794	1.03442	0	0	827350	Normalized LFQ intensity	0.822257	-0.00171315	1.43392	505.064	505.064	818.677	0.961681	485.711	0.745717	14.8882	Low confidence
AZD-1208	4 cell line mix	Kinobeads	CSNK2A1;CSNK2A3	1	1.06498	1.02257	1.00324	0.761819	0.794603	1.12178	0.72983	0.212603	53834000	Normalized LFQ intensity	5.07294	0.212297	0.967238	3505.09	3505.09	1300.81	1.01946	3505.09	0.822526	-3.00987	High confidence
AZD-1208	4 cell line mix	Kinobeads	CSNK2A2	1	1.01881	0.917133	1.01905	0.724077	0.708919	1.28517	0.610433	0.107177	104750000	Normalized LFQ intensity	8.82103	0.107182	0.953298	3133.53	3133.53	987.493	0.962701	3016.66	0.742537	3.70041	High confidence
AZD-1208	4 cell line mix	Kinobeads	CSNK2B	1	1.37575	1.43641	1.26019	0.893976	0.708002	1.12855	0.584278	0.170417	66153000	Normalized LFQ intensity	0.546008	-0.254486	1.24057	5990.35	5990.35	20215.7	1.08129	5990.35	0.730042	7.67855	High confidence
AZD-1208	4 cell line mix	Kinobeads	EIF3J	1	1.53569	2.17504	2.72881	1.48973	1.54551	2.30412	1.04902	0.130527	10548000	Normalized LFQ intensity	6.01336	0.130832	1.82568	3086.05	3086.05	950.273	1.10588	3086.05	0.568062	23.5387	Low confidence
AZD-1208	4 cell line mix	Kinobeads	PIM1	1	0.431846	0.311958	0	0	0	0	0	0	14259000	Normalized LFQ intensity	0.944151	-0.00338802	0.99843	2.57198	2.57198	0.773467	0.426106	1.09593	0.980247	-19.0682	High confidence
AZD-1208	4 cell line mix	Kinobeads	PTPN1	1	0.83576	0	0	0	0	0	0	0	5652400	Normalized LFQ intensity	4.79998	-0.00966998	1.0005	4.21329	4.21329	0.159828	1.08033	4.21329	0.999549	-50.067	Low confidence
AZD-1480	4 cell line mix	Kinobeads	AURKA	1	1.17383	1.21139	1.07969	1.02444	0.950727	0.659442	0.4262	0.291694	205220000	Normalized LFQ intensity	1.21256	0.278156	1.1158	865.344	865.344	275.752	0.353704	306.076	0.967221	-15.2032	High confidence
AZD-1480	4 cell line mix	Kinobeads	AURKB	1	1.27701	1.38785	1.10172	1.28339	1.1423	1.17039	0.785617	0.498427	37372000	Normalized LFQ intensity	3.061	0.498065	1.19956	2663.5	2663.5	920.242	0.585272	1558.87	0.836487	-3.87471	High confidence
AZD-1480	4 cell line mix	Kinobeads	CDK3	1	0.845086	0.940588	0.656007	1.10979	0.58786	0.511422	0	0	8781000	Normalized Intensity	1.52068	-0.0432725	0.895351	941.547	941.547	562.47	2.154	941.547	0.863605	1.32155	Low confidence
AZD-1480	4 cell line mix	Kinobeads	COG1	1	0.905119	0.677179	0.370832	0.597371	0.331366	0	0.121679	0	1506100	Normalized Intensity	0.504623	-0.0490543	1.01443	56.9717	56.9717	68.9068	1.1165	56.9717	0.899306	-2.92242	Low confidence
AZD-1480	4 cell line mix	Kinobeads	CSNK2A1;CSNK2A3	1	1.31327	1.20658	1.14584	1.21965	1.0129	0.954582	0.784744	0.338207	199890000	Normalized LFQ intensity	0.823795	0.155673	1.17748	4868.1	4868.1	6616.77	1.01946	4868.1	0.907801	-7.95364	High confidence
AZD-1480	4 cell line mix	Kinobeads	CSNK2A2	1	1.53886	1.29413	1.40616	1.3046	1.2499	1.137	0.869311	0.293502	291060000	Normalized LFQ intensity	1.22273	0.206772	1.3086	4109.31	4109.31	4260.95	0.962701	3956.04	0.855397	0.199547	High confidence
AZD-1480	4 cell line mix	Kinobeads	CSNK2B	1	1.53765	1.41401	1.43919	1.32532	1.19505	1.33676	0.970922	0.326364	157670000	Normalized LFQ intensity	4.03726	0.326241	1.32209	3484.67	3484.67	1984.67	1.08129	3484.67	0.82822	1.75554	High confidence
AZD-1480	4 cell line mix	Kinobeads	EIF3J	1	0.914585	1.33073	1.15174	1.28877	1.29893	1.18182	0.936991	0.257614	173440000	Normalized LFQ intensity	3.60653	0.256561	1.16734	4059.15	4059.15	4357.7	1.10588	4059.15	0.829233	-0.243188	High confidence
AZD-1480	4 cell line mix	Kinobeads	FER	1	1.35066	1.48075	1.28707	1.19829	1.03656	0.893811	0.601768	0.373632	413070000	Normalized LFQ intensity	1.01371	0.340028	1.27694	1225.45	1225.45	956.669	0.422267	517.466	0.871407	-1.40835	High confidence
AZD-1480	4 cell line mix	Kinobeads	FGFR1	1	1.41556	1.32249	1.17223	1.01801	0.749883	0.739425	0.415434	0	10653000	Normalized LFQ intensity	0.752416	-0.00176978	1.23879	1054.99	1054.99	961.451	0.736349	776.838	0.907267	-0.266696	High confidence
AZD-1480	4 cell line mix	Kinobeads	FLT3	1	1.40724	1.4672	1.23578	1.16202	1.382	1.2752	0.939901	0.540171	6764500	Normalized LFQ intensity	3.95755	0.539948	1.27674	3135.45	3135.45	997.103	0.537356	1684.85	0.771435	0.0231705	High confidence
AZD-1480	4 cell line mix	Kinobeads	INCENP	1	1.40854	1.12529	0.905876	1.30514	1.08478	1.06014	0.564627	0.53479	3445500	Normalized LFQ intensity	6.8664	0.548602	1.13824	1315.01	1315.01	NA	0.892521	1173.68	0.74701	1.18936	Low confidence
AZD-1480	4 cell line mix	Kinobeads	PAK4	1	1.1923	1.30211	1.26829	1.16411	1.14363	1.14003	0.832262	0.451003	528960000	Normalized LFQ intensity	2.39136	0.447574	1.17964	3135.59	3135.59	931.38	0.600921	1884.24	0.900562	-9.08354	High confidence
AZD-1480	4 cell line mix	Kinobeads	PLK4	1	1.35497	1.19869	1.30568	1.40842	1.05626	0.548521	0.501209	0.22302	7894300	Normalized LFQ intensity	2.09258	0.335081	1.25292	604.786	604.786	301.062	0.509269	307.999	0.90227	-0.727991	High confidence
AZD-1480	4 cell line mix	Kinobeads	PTK2	1	1.50179	1.39954	1.30575	1.14708	0.910235	0.686848	0.480454	0.359125	1147400000	Normalized LFQ intensity	1.10587	0.36651	1.30851	469.025	469.025	349.722	0.408006	191.365	0.885369	-0.322705	High confidence
AZD-1480	4 cell line mix	Kinobeads	PTK2B	1	1.42059	1.45963	1.32856	1.38925	1.25196	1.16834	1.03033	0.617304	574440000	Normalized LFQ intensity	1.11627	0.536045	1.31473	4544.05	4544.05	7051.71	0.414584	1883.89	0.756678	-0.895141	High confidence
AZD-1480	4 cell line mix	Kinobeads	RASSF5	1	1.408	1.33518	1.10559	1.11189	0.900848	0	0	0	4891800	Normalized LFQ intensity	4.53963	-0.00146125	1.19296	383.874	383.874	199.4	0.983194	377.423	0.958034	-2.50597	High confidence
AZD-1480	4 cell line mix	Kinobeads	RET	1	1.32965	1.12679	1.12767	1.04622	0.692113	0.449348	0.247481	0.0331502	154610000	Normalized LFQ intensity	0.992902	0.0359372	1.17047	539.533	539.533	252.651	0.440569	237.702	0.958264	-7.48898	High confidence
AZD-1480	4 cell line mix	Kinobeads	SAV1	1	0.666591	1.50605	0.943059	1.0239	0.974602	0	0	0	2510800	Normalized LFQ intensity	6.72274	-0.00104463	1.02813	460.536	460.536	980.053	0.8668	399.193	0.849905	7.73515	High confidence
AZD-1480	4 cell line mix	Kinobeads	SLK	1	1.19412	0.806271	1.05693	1.06777	0.797715	0.556782	0.303447	0.19826	361080000	Normalized LFQ intensity	1.37131	0.194785	1.02938	769.77	769.77	400.064	0.890695	685.631	0.910766	-5.03629	High confidence
AZD-1480	4 cell line mix	Kinobeads	STK10	1	1.15509	1.04483	0.997325	0.999757	0.766899	0.605772	0.285715	0.177438	220040000	Normalized LFQ intensity	1.02739	0.142035	1.06338	795.024	795.024	242.936	0.915468	727.82	0.976589	-17.1052	High confidence
AZD-1480	4 cell line mix	Kinobeads	STK11	1	2.31366	3.24714	3.99328	1.1392	1.36819	1.64548	0.401959	0	1250700	Normalized Intensity	0.939821	-0.00353873	2.41781	846.85	846.85	2199.84	0.843505	714.322	0.48019	34.2994	Low confidence
AZD-1480	4 cell line mix	Kinobeads	STK3	1	1.58782	1.49383	1.42649	1.43328	1.16331	0.876908	0.489541	0.254789	48940000	Normalized LFQ intensity	1.34755	0.245361	1.38932	1125.58	1125.58	673.927	0.764244	860.221	0.877175	2.95769	High confidence
AZD-1480	4 cell line mix	Kinobeads	STK4	1	1.21845	1.36116	1.27736	1.30343	0.998231	0.746691	0.447084	0.190617	280900000	Normalized LFQ intensity	1.26361	0.187126	1.23203	1129.76	1129.76	537.251	0.762521	861.463	0.930345	-4.53193	High confidence
AZD-1480	4 cell line mix	Kinobeads	STRADA	1	1.99532	1.81134	1.46946	2.16216	1.23395	0.616481	0.750936	0.36297	3844400	Normalized Intensity	6.98195	0.576614	1.68764	316.449	316.449	112.425	1.02005	316.449	0.712605	16.1328	Low confidence
AZD-1480	4 cell line mix	Kinobeads	TNK1	1	1.26769	1.30895	1.15973	1.13836	1.08539	0.778196	0.686818	0	20886000	Normalized LFQ intensity	1.01863	-0.00176255	1.18036	2922.66	2922.66	1650.31	0.432597	1264.33	0.932257	-4.91229	High confidence
AZD-1480	4 cell line mix	Kinobeads	TNK2	1	1.40588	1.58132	1.33422	1.32976	1.08239	0.834622	0.580089	0.285175	34802000	Normalized LFQ intensity	1.09514	0.271244	1.33965	1144.3	1144.3	887.532	0.450162	515.119	0.866796	1.78836	High confidence
AZD-2014	4 cell line mix	Kinobeads	ETF1	1	5.42558	2.5992	0.921501	0.651422	0.436117	1.24585	0.115988	0.427323	1420400	Normalized Intensity	3.47916	0.590282	3.17447	15.4143	15.4143	23.128	1.25499	15.4143	0.522727	37.9694	Low confidence
AZD-2014	4 cell line mix	Kinobeads	FAH	1	1.50062	1.35745	0.874124	0.506707	0	0.265696	0.0369762	0	1283800	Normalized Intensity	1.68999	0.06859	1.28524	57.7804	57.7804	27.6424	1.14702	57.7804	0.917254	3.51075	Low confidence
AZD-2014	4 cell line mix	Kinobeads	PFKP	1	1.80528	1.35605	1.13865	0.990827	0.964664	0.833282	0	0	3362700	Normalized LFQ intensity	0.983626	-0.123831	1.31432	982.564	982.564	925.684	1.38685	982.564	0.809374	10.8781	High confidence
AZD-4547	4 cell line mix	Kinobeads	AURKB	1	0.805661	0.988365	0.950774	1.05564	1.01015	0.962481	0.639483	0.37484	35395000	Normalized LFQ intensity	4.4494	0.374919	0.968384	2856.78	2856.78	645.072	0.585272	1671.99	0.906678	-12.7872	Low confidence
AZD-4547	4 cell line mix	Kinobeads	DDR1	1	0.952847	0.4576	0.640422	0.45146	0.421781	0.231952	0.192039	0.039541	51040000	Normalized LFQ intensity	0.370643	-0.0567116	1.01699	89.9815	89.9815	191.554	0.627266	56.4424	0.894724	-4.84112	High confidence
AZD-4547	4 cell line mix	Kinobeads	DDR2	1	0.835334	0.748986	0.885261	0.722786	0.640574	0.502717	0.389674	0.113015	100620000	Normalized LFQ intensity	0.315155	-0.60469	0.974395	16926.1	16926.1	45867.6	0.762065	12898.8	0.966411	-18.3102	High confidence
AZD-4547	4 cell line mix	Kinobeads	EIF2AK1	1	1.03377	1.2677	1.40211	0.674788	0.52657	0.396648	0.308786	0	5672400	Normalized LFQ intensity	1.32511	0.181651	1.16686	183.977	183.977	244.117	0.921519	169.538	0.856804	4.40767	High confidence
AZD-4547	4 cell line mix	Kinobeads	FGFR1	1	0.409636	0.323822	0	0	0	0	0	0	11217000	Normalized LFQ intensity	0.884141	-0.00399654	0.99843	2.36006	2.36006	0.85758	0.736349	1.73783	0.975899	-17.346	High confidence
AZD-4547	4 cell line mix	Kinobeads	INCENP	1	0.940909	1.0013	1.28701	0.848252	0.768831	0.565185	0.456633	0	10210000	Normalized LFQ intensity	0.754256	-0.0864244	1.04557	1858.22	1858.22	2007.92	0.892521	1658.5	0.899538	-2.73743	High confidence
AZD-4547	4 cell line mix	Kinobeads	MAP3K11	1	0.957306	0.769132	1.0148	0.738806	0.79892	0.817485	0.519418	0.227878	13509000	Normalized LFQ intensity	0.44516	-0.573516	0.953728	37327.5	37327.5	191300	0.696515	25999.2	0.863313	-7.25692	Low confidence
AZD-4547	4 cell line mix	Kinobeads	MAP4K1	1	0.85708	0.906267	0.933034	0.617008	0.510624	0.471655	0	0	7628200	Normalized LFQ intensity	0.735837	-0.0704056	0.956458	487.057	487.057	333.053	0.726208	353.704	0.937763	-6.79293	High confidence
AZD-4547	4 cell line mix	Kinobeads	MAP4K2	1	1.1921	0.94747	0.972949	0.624765	0.446532	0.165459	0	0	22843000	Normalized LFQ intensity	0.971721	-0.0265977	1.08049	186.584	186.584	62.6321	0.590017	110.088	0.976349	-12.1552	High confidence
AZD-4547	4 cell line mix	Kinobeads	MAP4K3	1	1.76146	1.1798	1.22671	0.453421	0.221735	0.076661	0	0	13623000	Normalized LFQ intensity	2.03999	0.0460833	1.33652	74.5581	74.5581	32.4803	0.655746	48.8911	0.900111	6.94326	High confidence
AZD-4547	4 cell line mix	Kinobeads	MAP4K5	1	0.769379	0.373376	0.269211	0.0698571	0.00627384	0	0	0	161190000	Normalized LFQ intensity	1.0006	-0.00277578	1.00934	7.88981	7.88981	1.37574	0.744124	5.871	0.990546	-24.1727	High confidence
AZD-4547	4 cell line mix	Kinobeads	MARK2	1	1.01276	1.00936	1.0919	0.904831	0.934098	0.823183	0.644926	0.234713	192490000	Normalized LFQ intensity	0.740238	-0.0215545	1.02182	6583.99	6583.99	7592.99	0.753322	4959.87	0.975575	-21.8063	High confidence
AZD-4547	4 cell line mix	Kinobeads	MARK3	1	1.04376	1.06417	1.2303	0.998039	0.975904	0.883819	0.770198	0.264253	31091000	Normalized LFQ intensity	0.743846	-0.134348	1.073	11705.4	11705.4	26846.6	0.770892	9023.58	0.936014	-12.565	High confidence
AZD-4547	4 cell line mix	Kinobeads	NTRK1	1	0.69705	0.544177	0.73649	0.541741	0.511971	0.439249	0.389287	0.229525	24310000	Normalized LFQ intensity	0.171183	-0.24833	0.995702	3190.75	3190.75	11909.9	0.705864	2252.23	0.924096	-14.7198	Low confidence
AZD-4547	4 cell line mix	Kinobeads	PDGFRB	1	0.761828	0.69809	0.909736	0.719907	0.602088	0.399337	0.268754	0.334105	37752000	Normalized LFQ intensity	1.40888	0.295772	0.841979	329.163	329.163	200.86	0.873974	287.68	0.876685	-8.01863	High confidence
AZD-4547	4 cell line mix	Kinobeads	PHKA1	1	0.900846	0.72981	0	0	0	0	0	0	2239800	Normalized LFQ intensity	5.75645	-0.00108603	0.950621	12.3088	12.3088	2.13366	0.968031	11.9153	0.99688	-31.0884	Low confidence
AZD-4547	4 cell line mix	Kinobeads	RET	1	0.793793	0.639522	0.689218	0.434779	0.199977	0.111504	0.0751733	0.00524554	242670000	Normalized LFQ intensity	0.564659	-0.044633	0.975899	66.5931	66.5931	32.6666	0.440569	29.3389	0.975513	-16.3832	High confidence
AZD-4547	4 cell line mix	Kinobeads	SGTA	1	1.99259	2.23386	1.63859	1.70358	0.623018	0.402716	0	0	5479300	Normalized Intensity	1.95301	-0.00220321	1.74964	267.601	267.601	378.511	0.957277	256.169	0.829641	16.7522	Low confidence
AZD-4547	4 cell line mix	Kinobeads	STK26	1	0.93052	0.937202	0.771853	1.05448	0.736261	0.786104	0.600532	0	7777700	Normalized LFQ intensity	1.07248	-0.122243	0.919578	5688.54	5688.54	5301.27	0.878316	4996.33	0.912005	-7.02823	High confidence
AZD-4547	4 cell line mix	Kinobeads	TNIK	1	0.933322	1.02524	1.17781	0.846454	0.851014	0	0.917914	0	4757500	Normalized LFQ intensity	0.586635	-0.0139129	1.05663	1387.24	1387.24	7927.94	1.02305	1387.24	0.55049	13.3688	Low confidence
AZD-4547	4 cell line mix	Kinobeads	TNK2	1	0.875745	0.763728	0.939453	0.805804	0.69244	0.56679	0.490665	0.472564	42436000	Normalized LFQ intensity	1.06651	0.461588	0.904902	329.581	329.581	219.717	0.450162	148.365	0.894038	-14.3961	Low confidence
AZD-4547	4 cell line mix	Kinobeads	ZAK	1	0.956765	1.14577	0.918915	0.949585	1.05918	0.758159	0.754053	0.286508	16884000	Normalized LFQ intensity	0.706894	-0.110451	1.01643	12829	12829	50632.1	0.743597	9539.61	0.89348	-9.43819	High confidence
AZD-5363	4 cell line mix	Kinobeads	ADRBK1	1	0.867062	0.936048	1.0213	0.885132	0.742772	0.87229	0.616766	0	13674000	Normalized LFQ intensity	1.55369	-0.0349915	0.916768	4859.25	4859.25	3933.8	1.12537	4859.25	0.938221	-10.3832	High confidence
AZD-5363	4 cell line mix	Kinobeads	AKT1	1	1.23134	1.04058	0.924389	0.992748	1.21677	0.923781	0.857216	0.510793	52094000	Normalized LFQ intensity	1.38042	0.474883	1.06164	4317.29	4317.29	5379.49	0.899386	3882.91	0.75273	-4.93656	High confidence
AZD-5363	4 cell line mix	Kinobeads	AKT2	1	1.17424	1.07711	0.842081	0.989806	1.14499	0.889247	0.744955	0.456225	37687000	Normalized LFQ intensity	1.51799	0.441967	1.03558	2906.3	2906.3	2123.42	0.856753	2489.98	0.801737	-5.97314	High confidence
AZD-5363	4 cell line mix	Kinobeads	CLK1	1	0.85883	0.971023	0.800365	1.01375	1.15918	0	0	0	9033100	Normalized LFQ intensity	14.5193	-0.00138947	0.967207	663.615	663.615	2044.58	0.715477	474.802	0.959141	-6.01351	Low confidence
AZD-5363	4 cell line mix	Kinobeads	CLK4	1	0.420849	0.890344	1.06439	0.783781	0.516884	0.344754	0	0	1939700	Normalized Intensity	1.36599	-0.0261226	0.840028	607.629	607.629	553.437	0.84504	513.471	0.786233	5.24079	High confidence
AZD-5363	4 cell line mix	Kinobeads	FGFR1	1	1.11616	1.03731	0.933032	1.15632	1.25691	0.981209	0	0.536155	10257000	Normalized LFQ intensity	12.101	0.26619	1.08329	1174.5	1174.5	1829.49	0.736349	864.84	0.825997	2.78848	Low confidence
AZD-5363	4 cell line mix	Kinobeads	LATS1	1	0.833912	0.88121	0.803513	0.764139	0.843326	0.694891	0.468199	0.10792	35981000	Normalized LFQ intensity	0.521969	-0.500131	0.909152	17907.7	17907.7	NA	0.787536	14103	0.950084	-15.1365	High confidence
AZD-5363	4 cell line mix	Kinobeads	LIMK1	1	0.845543	0.877321	0.71253	0.720797	0.481786	0.479683	0.228832	0	22001000	Normalized LFQ intensity	0.50604	-0.0627648	0.96083	600.431	600.431	443.49	0.594601	357.016	0.966186	-15.189	High confidence
AZD-5363	4 cell line mix	Kinobeads	LIMK2	1	1.02725	1.01362	0.875107	0.884342	0.770932	0.387145	0.144852	0.0233875	73679000	Normalized LFQ intensity	1.21914	0.005772	0.986472	718.952	718.952	129.578	0.662896	476.59	0.98914	-22.1209	High confidence
AZD-5363	4 cell line mix	Kinobeads	MAP3K11	1	0.772874	0.774206	0.619254	0.787919	0.849212	0.788918	0.364035	0	13926000	Normalized LFQ intensity	4.07463	-0.000549154	0.800463	2870.41	2870.41	611.768	0.696515	1999.28	0.89572	-6.36516	High confidence
AZD-5363	4 cell line mix	Kinobeads	MAP4K3	1	1.05772	1.00172	0.839581	1.00674	1.05772	0.810169	0.70371	0.412413	22259000	Normalized LFQ intensity	1.26634	0.385911	0.99421	2897.62	2897.62	1965.14	0.655746	1900.1	0.887517	-11.9939	High confidence
AZD-5363	4 cell line mix	Kinobeads	PKN1	1	0.981844	1.07286	0.85896	1.08809	1.01989	0.743631	0.475482	0.209083	52226000	Normalized LFQ intensity	1.59149	0.207505	1.00817	1804.02	1804.02	602.666	0.874092	1576.88	0.945806	-12.2792	High confidence
AZD-5363	4 cell line mix	Kinobeads	PRKAA1	1	0.985522	0.976154	0.940726	1.11071	1.14589	0.887072	0.643604	0.285054	817050000	Normalized LFQ intensity	1.85723	0.277964	1.02284	2855.31	2855.31	867.338	0.637811	1821.15	0.932241	-12.5024	High confidence
AZD-5363	4 cell line mix	Kinobeads	PRKAB1	1	0.71381	1.32652	0.804906	0.953616	1.1162	0.980844	0.667475	0.306401	84765000	Normalized LFQ intensity	3.838	0.306098	0.98634	3101.48	3101.48	1272.45	0.662068	2053.39	0.651794	3.94805	High confidence
AZD-5363	4 cell line mix	Kinobeads	PRKAB2	1	0.707213	1.34905	0.770977	0.859093	1.11575	0.697716	0.522514	0.322085	7721000	Normalized LFQ intensity	1.84197	0.339817	0.965209	1517.31	1517.31	1907.39	0.601053	911.985	0.60546	6.00178	High confidence
AZD-5363	4 cell line mix	Kinobeads	PRKACA	1	1.01307	0.923505	0.678758	0.666493	0.786466	0.275983	0.238824	0	64164000	Normalized LFQ intensity	0.514061	-0.162674	1.00797	822.412	822.412	1105.22	0.470095	386.612	0.916488	-4.96389	High confidence
AZD-5363	4 cell line mix	Kinobeads	PRKACB	1	1.39226	1.01405	0.691728	0.629386	0.83263	0.423851	0.21532	0.0511323	123240000	Normalized LFQ intensity	0.529401	-0.0782702	1.14	505.767	505.767	978.34	0.472983	239.219	0.824445	4.265	High confidence
AZD-5363	4 cell line mix	Kinobeads	PRKAG1	1	1.17987	1.34395	0.791034	0.916582	1.16611	1.0569	0.859732	0.368717	486170000	Normalized LFQ intensity	3.43735	0.368096	1.06588	3863.24	3863.24	6729.06	0.632872	2444.94	0.683068	2.38164	High confidence
AZD-5363	4 cell line mix	Kinobeads	PRKAG2	1	1.18215	1.35982	0.904086	1.1112	1.13937	1.09545	0.869614	0	5222100	Normalized LFQ intensity	3.75154	-0.00130107	1.114	4203.87	4203.87	NA	0.644818	2710.73	0.898959	-2.11027	High confidence
AZD-5363	4 cell line mix	Kinobeads	PRKCA	1	0.957035	0.809028	0.771137	0.87743	0.931269	0.762109	0.416606	0.115697	111200000	Normalized LFQ intensity	1.99467	0.111756	0.891664	2380.29	2380.29	639.84	0.728153	1733.21	0.939834	-12.1388	High confidence
AZD-5363	4 cell line mix	Kinobeads	PRKCB	1	0.95358	0.90231	0.882062	1.09229	1.12241	0.894936	0.595715	0.184472	302200000	Normalized LFQ intensity	2.16533	0.179713	0.989082	3047	3047	831.278	0.797918	2431.25	0.924774	-10.0114	High confidence
AZD-5363	4 cell line mix	Kinobeads	PRKCD	1	0.914216	0.803962	0.745333	0.850423	1.0852	0.904977	0.528263	0.183795	37820000	Normalized LFQ intensity	6.82344	0.183791	0.900648	2965.97	2965.97	517.408	0.947106	2809.09	0.866614	-5.96483	High confidence
AZD-5363	4 cell line mix	Kinobeads	PRKCQ	1	1.03801	1.09195	1.22474	0.89699	1.05769	1.06987	0.840819	0	3194300	Normalized LFQ intensity	3.95863	-0.00127504	1.05445	4246.38	4246.38	4663.17	1.22906	4246.38	0.943297	-8.75062	High confidence
AZD-5363	4 cell line mix	Kinobeads	PRKD2	1	0.865874	0.942556	0.845969	1.04829	1.04716	0.918977	0.625656	0.160838	107160000	Normalized LFQ intensity	2.66722	0.158541	0.957136	3407.15	3407.15	815.256	0.659146	2245.81	0.937887	-12.3395	High confidence
AZD-5363	4 cell line mix	Kinobeads	PRKD3	1	0.815889	0.839705	0.829748	1.04508	1.19598	0.997571	0.499566	0.0615816	54973000	Normalized LFQ intensity	8.30793	0.0615828	0.96058	2981.58	2981.58	320.512	0.740225	2207.04	0.873413	-2.47042	High confidence
AZD-5363	4 cell line mix	Kinobeads	PRKG1	1	1.13053	0.865389	0.880166	0.961749	0.64644	0.350196	0	0	11392000	Normalized LFQ intensity	1.34069	-0.0370947	0.985197	585.613	585.613	194.1	0.506362	296.532	0.962058	-9.13557	High confidence
AZD-5363	4 cell line mix	Kinobeads	PRKX;PRKY	1	0.883482	0.824571	0.822611	0.762458	0.909542	0.542375	0	0	8512100	Normalized LFQ intensity	6.46295	-0.00115342	0.867306	1082.37	1082.37	274.805	0.812178	879.074	0.970588	-13.5517	High confidence
AZD-5363	4 cell line mix	Kinobeads	RET	1	0.913809	0.853079	0.84689	0.998453	0.975841	0.850441	0.497872	0.212343	193060000	Normalized LFQ intensity	2.37901	0.210912	0.930987	2512.97	2512.97	497.776	0.440569	1107.14	0.955381	-16.3386	High confidence
AZD-5363	4 cell line mix	Kinobeads	ROCK1	1	0.902918	0.786745	0.774639	0.769646	0.683819	0.374275	0.175089	0.0422571	509270000	Normalized LFQ intensity	0.857981	-0.0134138	0.897149	776.455	776.455	326.044	0.909344	706.064	0.967056	-14.9712	High confidence
AZD-5363	4 cell line mix	Kinobeads	ROCK2	1	1.01381	0.85216	0.768603	0.695879	0.566228	0.296986	0.144483	0.0322103	527580000	Normalized LFQ intensity	0.614622	-0.0533567	1.00367	372.003	372.003	136.996	0.871861	324.335	0.986738	-21.6701	High confidence
AZD-5438	4 cell line mix	Kinobeads	AAK1	1	0.682974	0.965613	0.517563	0.442523	0.622335	0.325891	0.144645	0	94393000	Normalized LFQ intensity	0.381286	-0.132269	0.973847	338.823	338.823	769.19	0.673073	228.053	0.848733	-0.987734	High confidence
AZD-5438	4 cell line mix	Kinobeads	BMP2K	1	0.428634	0.631119	0.420181	0.31448	0.486642	0.323468	0.18531	0.0713976	90471000	Normalized LFQ intensity	0.136654	-0.458367	0.998303	1250.1	1250.1	6628.57	0.660952	826.256	0.885754	-7.64714	High confidence
AZD-5438	4 cell line mix	Kinobeads	C2CD5	1	0.404302	0.447259	0.335882	0.334053	0.364935	0.195859	0.110923	0.0383707	109150000	Normalized LFQ intensity	0.12018	-0.523606	0.998986	501.936	501.936	1952.48	0.545264	273.688	0.968435	-18.7557	High confidence
AZD-5438	4 cell line mix	Kinobeads	CCNT1	1	0.290565	0.394502	0.33634	0.160546	0.309601	0.244101	0.136415	0	27479000	Normalized LFQ intensity	0.138051	-0.113984	0.996593	0.579835	0.579835	1.992	0.983173	0.570078	0.932788	-11.6135	High confidence
AZD-5438	4 cell line mix	Kinobeads	CDK1	1	1.07412	1.33903	0.783025	1.06968	1.80229	1.45399	0.798097	0.463053	124580000	Normalized LFQ intensity	6.58146	0.461821	1.21748	2903.28	2903.28	1059.8	0.685984	1991.61	0.461062	13.4318	Low confidence
AZD-5438	4 cell line mix	Kinobeads	CDK2	1	0.683874	0.941326	0.623822	0.512749	0.820891	0.500226	0.173544	0.0428935	78025000	Normalized LFQ intensity	2.04679	0.0461364	0.767836	1354.65	1354.65	897.153	0.532482	721.325	0.783119	1.44397	High confidence
AZD-5438	4 cell line mix	Kinobeads	CDK5	1	1.53159	1.82242	1.57981	0.887749	1.25523	0.759637	0.491719	0.10263	173840000	Normalized LFQ intensity	0.862503	0.0299757	1.43726	1196.76	1196.76	1636.69	0.523615	626.641	0.761082	12.0186	High confidence
AZD-5438	4 cell line mix	Kinobeads	CDK7	1	1.10295	1.38576	0.95415	0.778457	1.46422	1.16724	0.768388	0.279679	35380000	Normalized LFQ intensity	4.81734	0.279271	1.12208	3214.9	3214.9	1342.07	0.725457	2332.27	0.658242	7.31552	High confidence
AZD-5438	4 cell line mix	Kinobeads	CDK9	1	0.761219	1.2623	0.66345	0.539806	0.765815	0.415884	0.189447	0.144773	58835000	Normalized LFQ intensity	0.588735	0.0423841	0.989396	449.695	449.695	894.8	0.711499	319.958	0.745579	4.92705	High confidence
AZD-5438	4 cell line mix	Kinobeads	CSNK1A1	1	1.26828	1.43634	1.34521	0	1.31691	1.08257	0.687017	0	11106000	Normalized LFQ intensity	3.7794	-0.00119294	1.06566	3506.17	3506.17	4009.15	0.923531	3238.06	0.416738	20.1605	High confidence
AZD-5438	4 cell line mix	Kinobeads	CSNK1D	1	0.867866	1.39302	0.71532	0.61506	1.04615	0.466884	0.290094	0	27464000	Normalized LFQ intensity	0.834211	-0.0719038	0.993219	1421.47	1421.47	2243.6	0.822647	1169.37	0.719565	8.57294	High confidence
AZD-5438	4 cell line mix	Kinobeads	CSNK2A1;CSNK2A3	1	1.29407	1.49634	1.18258	1.59748	1.45485	1.08355	0.558327	0.382694	20534000	Normalized LFQ intensity	2.64812	0.399035	1.33743	1526.51	1526.51	902.291	1.01946	1526.51	0.819337	4.32007	High confidence
AZD-5438	4 cell line mix	Kinobeads	CSNK2A2	1	1.22238	1.36318	0.992442	0.934628	1.39756	0.730006	0.436576	0	43580000	Normalized LFQ intensity	1.59162	-0.00232453	1.14834	1955.16	1955.16	1195.03	0.962701	1882.23	0.847427	4.27977	High confidence
AZD-5438	4 cell line mix	Kinobeads	CSNK2B	1	0.634607	1.04561	0.72706	0.552486	0.945303	0.720751	0.28529	0	13233000	Normalized LFQ intensity	2.56181	-0.00101118	0.816377	2344.62	2344.62	1187.51	1.08129	2344.62	0.772105	2.90438	High confidence
AZD-5438	4 cell line mix	Kinobeads	EIF3J	1	0.393751	0.473928	0.357729	0.507882	0.374884	0.343612	0.130366	0.080933	16256000	Normalized LFQ intensity	0.112852	-0.475961	0.997905	1179.46	1179.46	5972.6	1.10588	1179.46	0.900703	-9.3046	High confidence
AZD-5438	4 cell line mix	Kinobeads	FIBP	1	1.11014	2.31164	1.53606	1.04717	0.902503	0.96065	0.396478	0	9059700	Normalized LFQ intensity	0.87437	-0.00214517	1.44018	1130.69	1130.69	2126.23	0.570275	644.805	0.627402	18.8532	High confidence
AZD-5438	4 cell line mix	Kinobeads	GSK3A	1	0.656413	1.07076	0.593359	0.426745	0.428855	0.198934	0.0921772	0.0647604	86336000	Normalized LFQ intensity	0.645165	0.0251778	0.956107	110.925	110.925	130.062	0.500216	55.4865	0.861797	-0.487005	High confidence
AZD-5438	4 cell line mix	Kinobeads	GSK3B	1	1.27411	1.66742	0.985701	0.682689	0.47916	0.208701	0.0948585	0	94230000	Normalized LFQ intensity	1.17974	0.0601434	1.28615	133.494	133.494	103.318	0.464999	62.0745	0.880891	6.14247	High confidence
AZD-5438	4 cell line mix	Kinobeads	IRAK3	1	1.60532	2.09563	1.67569	1.23077	1.24107	0.891112	0.757365	0	6856000	Normalized LFQ intensity	0.85716	-0.00251041	1.55442	1797.1	1797.1	2658.64	0.428885	770.751	0.750502	14.0132	High confidence
AZD-5438	4 cell line mix	Kinobeads	MAPK8	1	0.583737	1.81168	0.727761	0.479856	1.18061	0.852508	0.443796	0.0742683	43192000	Normalized LFQ intensity	2.37651	0.0729696	0.961276	2585.76	2585.76	2843.49	0.648022	1675.63	0.40354	18.4244	High confidence
AZD-5438	4 cell line mix	Kinobeads	MAPK9	1	0.829865	1.43169	0.812936	0.915256	1.55522	1.47281	0.274129	0	15385000	Normalized LFQ intensity	11.4187	-0.000931076	1.1454	2711.9	2711.9	3826.57	0.699871	1897.98	0.716288	12.754	High confidence
AZD-5438	4 cell line mix	Kinobeads	PRKD2	1	0.774809	0.740727	0.942968	0.814739	0.803557	0.562096	0.547759	0	29003000	Normalized LFQ intensity	0.987863	-0.019632	0.858255	3511.17	3511.17	2605.7	0.659146	2314.38	0.896487	-6.73095	High confidence
AZD-5438	4 cell line mix	Kinobeads	PRKD3	1	0	0.0501635	0	0	0.256025	0.215885	0.0853397	0	10274000	Normalized Intensity	-2.91737e-05	0.99989	-0.850651	54098497323113	54098497323113	NA	0.740225	4.00451e+13	0.909139	-6.45813	Low confidence
AZD-5438	4 cell line mix	Kinobeads	YWHAG	1	0.582738	0.72866	0.667603	0.570213	0.729154	0.540007	0.617027	0.304829	30462000	Normalized LFQ intensity	0.131035	0.0161864	0.994545	3469.63	3469.63	18717.8	0.983251	3411.51	0.738358	-6.86403	Low confidence
AZD-6482	4 cell line mix	Kinobeads	DDX6	1	1.33387	1.19034	1.20592	0.698883	1.12516	0.873494	0.715102	0	6285500	Normalized LFQ intensity	1.23751	-0.00133692	1.0981	4103.05	4103.05	3632.66	1.1178	4103.05	0.804641	4.49945	Low confidence
AZD-6482	4 cell line mix	Kinobeads	PGD	1	1.80316	1.84357	1.25309	0.849245	1.31587	0.881882	0.804121	0.713702	9333600	Normalized LFQ intensity	0.938505	0.772599	1.49348	150.821	150.821	791.565	1.53162	150.821	0.485426	14.0488	Low confidence
AZD-7762	4 cell line mix	Kinobeads	AAK1	1	1.91857	1.83562	1.40798	0.746964	0.443676	0.113633	0.0171381	0	90397000	Normalized LFQ intensity	1.54469	0.0450823	1.58662	108.058	108.058	70.3989	0.673073	72.7308	0.874174	11.788	High confidence
AZD-7762	4 cell line mix	Kinobeads	ABL1	1	1.38794	1.28869	1.45785	1.30807	1.09187	0.669828	0.47622	0.105921	73814000	Normalized LFQ intensity	1.2143	0.119601	1.2977	1112.51	1112.51	652.893	0.547922	609.572	0.914889	-0.517894	High confidence
AZD-7762	4 cell line mix	Kinobeads	ABL2	1	1.48322	1.51619	1.5935	1.56437	1.43945	0.958688	0.866926	0.251538	83387000	Normalized LFQ intensity	1.13261	0.191069	1.43792	2712.98	2712.98	2735.94	0.331378	899.02	0.816778	5.88741	High confidence
AZD-7762	4 cell line mix	Kinobeads	ACVR2B	1	1.18013	0.92637	1.01915	1.00256	0.810063	0	0	0	2272300	Normalized LFQ intensity	5.64896	-0.00160923	1.02577	379.265	379.265	304.215	0.666614	252.824	0.982812	-13.4352	High confidence
AZD-7762	4 cell line mix	Kinobeads	AP2M1	1	0.729779	1.04714	1.021	0.920044	0.942138	0	0	0	1665200	Normalized LFQ intensity	10.8656	-0.00131035	0.943537	553.733	553.733	3617.59	1.03198	553.733	0.964154	-7.68763	Low confidence
AZD-7762	4 cell line mix	Kinobeads	AURKB	1	1.37884	1.7323	1.88127	1.6348	1.60954	0.882849	0.660313	0.232914	9455500	Normalized LFQ intensity	1.69645	0.297894	1.54776	1221.18	1221.18	1204.39	0.585272	714.72	0.775917	11.5308	High confidence
AZD-7762	4 cell line mix	Kinobeads	BCR	1	0.94024	1.04977	0.897692	0.594267	0.411348	0	0	0	17472000	Normalized LFQ intensity	1.21358	-0.033121	1.00256	177.145	177.145	42.6038	0.477847	84.6481	0.983083	-15.4355	High confidence
AZD-7762	4 cell line mix	Kinobeads	BMP2K	1	2.84036	2.3933	2.21189	1.52769	1.09559	0.58417	0.283974	0.124773	33997000	Normalized LFQ intensity	1.29867	0.18995	2.10987	274.6	274.6	313.751	0.660952	181.498	0.739173	22.7845	High confidence
AZD-7762	4 cell line mix	Kinobeads	BTK	1	1.30612	1.36834	1.48873	1.25473	1.33166	1.12865	1.03498	0.331954	628900000	Normalized LFQ intensity	1.18238	0.13882	1.28946	7843.07	7843.07	14555.5	0.390881	3065.71	0.849042	-0.870443	High confidence
AZD-7762	4 cell line mix	Kinobeads	CDK3	1	1.24878	1.22477	0.922633	0.737328	0.277199	0.127136	0	0	4419200	Normalized Intensity	1.30918	0.00145471	1.14981	139.317	139.317	40.4531	2.154	139.317	0.972254	-8.66331	High confidence
AZD-7762	4 cell line mix	Kinobeads	CHEK1	1	1.8713	0	0	0	0	0	0	0	2326600	Normalized LFQ intensity	12.0946	-0.00195288	1.43567	6.29012	6.29012	14.0135	0.824825	5.18824	0.894086	8.03847	High confidence
AZD-7762	4 cell line mix	Kinobeads	CSK	1	1.28545	1.36805	1.42958	1.17275	0.890126	0.466726	0.261327	0.0508335	816430000	Normalized LFQ intensity	1.34191	0.0864366	1.27192	581.592	581.592	267.746	0.538187	313.005	0.939927	-2.11516	High confidence
AZD-7762	4 cell line mix	Kinobeads	CSNK2A1;CSNK2A3	1	1.58712	1.79256	1.81039	1.70851	1.497	1.20887	0.875569	0.17772	79304000	Normalized LFQ intensity	1.24893	0.106546	1.57681	2985.01	2985.01	2746.74	1.01946	2985.01	0.799892	9.88089	High confidence
AZD-7762	4 cell line mix	Kinobeads	CSNK2A2	1	1.31532	1.48712	1.48807	1.33465	1.40605	1.15897	0.787241	0.158206	140280000	Normalized LFQ intensity	1.67813	0.131156	1.33821	3275.51	3275.51	1592.55	0.962701	3153.34	0.886453	0.746996	High confidence
AZD-7762	4 cell line mix	Kinobeads	CSNK2B	1	1.53682	1.52654	1.62032	1.43889	1.41647	1.13176	0.933852	0.16403	49528000	Normalized LFQ intensity	1.10344	-0.000572817	1.42946	4828.71	4828.71	6096.51	1.08129	4828.71	0.848487	4.48706	High confidence
AZD-7762	4 cell line mix	Kinobeads	DCAF7	1	1.377	1.4167	1.25482	1.09099	1.20871	0.792658	0.603157	0.371546	7264600	Normalized LFQ intensity	1.27123	0.368776	1.25009	1146.87	1146.87	765.078	0.89643	1028.09	0.868224	-1.25263	High confidence
AZD-7762	4 cell line mix	Kinobeads	DYRK1A	1	1.07006	1.29719	1.33103	1.23087	1.15635	0.914229	0.768753	0.502644	11000000	Normalized LFQ intensity	1.31215	0.497377	1.18908	1800.57	1800.57	1325.42	0.933007	1679.95	0.842436	-4.77281	High confidence
AZD-7762	4 cell line mix	Kinobeads	EGFR	1	3.29638	3.17549	3.71098	3.07463	2.44899	1.33523	0.601416	0	2730800	Normalized LFQ intensity	1.58151	-0.00360676	2.85242	1019.24	1019.24	1074.17	0.793047	808.309	0.685814	30.5216	High confidence
AZD-7762	4 cell line mix	Kinobeads	EIF3J	1	1.55692	1.74695	1.73928	1.64777	1.61713	1.39829	0.991026	0.16656	57322000	Normalized LFQ intensity	1.79603	0.134178	1.54978	3768.25	3768.25	2642.11	1.10588	3768.25	0.816869	8.39281	High confidence
AZD-7762	4 cell line mix	Kinobeads	ERLIN2	1	0.425134	0	0	0	0.346032	0	0	0	3118200	Normalized LFQ intensity	6.12496	0.0486199	1.00374	2.79969	2.79969	0.744991	1.07373	2.79969	0.892121	-3.73222	Low confidence
AZD-7762	4 cell line mix	Kinobeads	FER	1	1.27168	1.27376	1.24501	0.749585	0.519454	0.332303	0.193188	0.0126609	149440000	Normalized LFQ intensity	1.14777	0.0990189	1.21415	200.296	200.296	111.544	0.422267	84.5785	0.942647	-3.04429	High confidence
AZD-7762	4 cell line mix	Kinobeads	FES	1	1.82151	1.37438	1.31414	1.23969	1.06339	0.674986	0.443076	0.137059	38913000	Normalized LFQ intensity	0.971644	0.111887	1.39211	862.353	862.353	829.168	0.369564	318.694	0.837774	7.2099	High confidence
AZD-7762	4 cell line mix	Kinobeads	FRK	1	1.28088	1.41015	1.46362	1.33659	1.29704	0.936365	0.911543	0.389442	113710000	Normalized LFQ intensity	1.00298	0.293286	1.30334	3554.59	3554.59	4611.21	0.339663	1207.36	0.81953	0.702311	High confidence
AZD-7762	4 cell line mix	Kinobeads	FYN	1	1.12105	1.31538	1.15906	0.962855	0.835795	0.500496	0.362662	0.118681	103790000	Normalized LFQ intensity	0.994564	0.121887	1.15305	658.258	658.258	336.893	0.431007	283.714	0.949535	-7.71568	High confidence
AZD-7762	4 cell line mix	Kinobeads	GAK	1	1.34606	2.03327	2.03463	1.34704	0.95161	0.28509	0.157402	0.0156888	171880000	Normalized LFQ intensity	1.82689	0.0708287	1.58398	359.022	359.022	249.364	0.56156	201.612	0.81691	15.1423	High confidence
AZD-7762	4 cell line mix	Kinobeads	GRB2	1	0.975385	1.13819	1.25123	1.08765	0.639692	0.486269	0	0.488346	4066000	Normalized LFQ intensity	2.37996	0.303239	1.10006	285.587	285.587	156.58	0.623754	178.136	0.846892	2.43431	High confidence
AZD-7762	4 cell line mix	Kinobeads	HCK	1	1.32894	1.33633	1.18428	0.834573	0.493844	0.193926	0.0863237	0.0133948	254000000	Normalized LFQ intensity	1.3307	0.0443833	1.23166	198.529	198.529	70.2249	0.518348	102.907	0.961928	-5.21928	High confidence
AZD-7762	4 cell line mix	Kinobeads	INPPL1	1	4.12559	2.94274	0.891418	0.959514	0.353782	0	0	0	1669700	Normalized Intensity	12.8686	0.262721	2.68945	27.6475	27.6475	102.885	0.483409	13.3651	0.661689	32.3874	High confidence
AZD-7762	4 cell line mix	Kinobeads	IRAK4	1	1.26763	1.18684	1.30536	1.05396	0.665704	0.292474	0.103468	0	96128000	Normalized LFQ intensity	1.4032	0.00863137	1.19594	393.176	393.176	128.04	0.774264	304.422	0.967921	-7.4527	High confidence
AZD-7762	4 cell line mix	Kinobeads	JAK2	1	1.5272	1.46398	1.40994	1.66203	1.26079	1.00681	1.00047	0	1798700	Normalized LFQ intensity	1.25059	-0.0083621	1.38091	4608.94	4608.94	3741.72	0.798016	3678.01	0.830388	6.88935	High confidence
AZD-7762	4 cell line mix	Kinobeads	KLHL6	1	0.947908	0.924844	1.00088	0.828817	0.996492	0.912128	0.555266	0.0832755	11403000	Normalized Intensity	2.74376	0.0814459	0.949534	3206.51	3206.51	455.506	0.740829	2375.47	0.969464	-17.3194	Low confidence
AZD-7762	4 cell line mix	Kinobeads	LCK	1	1.31072	1.36789	1.41266	1.2478	1.39889	0.857346	0.861818	0.33808	238910000	Normalized LFQ intensity	1.07856	0.27585	1.28892	2940.84	2940.84	3304.76	0.440511	1295.47	0.817928	1.68806	High confidence
AZD-7762	4 cell line mix	Kinobeads	LYN	1	1.14295	1.30641	1.24099	1.00943	0.957281	0.567111	0.424264	0.11795	346060000	Normalized LFQ intensity	1.02745	0.111513	1.16966	956.945	956.945	506.2	0.501873	480.265	0.942648	-6.59913	High confidence
AZD-7762	4 cell line mix	Kinobeads	MAP2K1	1	1.29648	1.56752	1.42699	1.53101	1.28105	0.962042	0.522662	0	11990000	Normalized LFQ intensity	1.45821	-0.00155645	1.36283	2039.07	2039.07	1004.14	1.23132	2039.07	0.897279	3.13515	High confidence
AZD-7762	4 cell line mix	Kinobeads	MAP2K2	1	1.01685	1.60046	1.05379	1.47662	0.910031	0.730685	0.387362	0.0917479	21876000	Normalized LFQ intensity	1.26999	0.0884438	1.21651	1217.44	1217.44	1079.31	1.17379	1217.44	0.793579	7.90215	High confidence
AZD-7762	4 cell line mix	Kinobeads	MAP2K5	1	0.914203	1.42524	1.16059	0.692769	0.384068	0.0983002	0	0	18234000	Normalized LFQ intensity	1.5788	0.0120465	1.13095	168.13	168.13	81.6389	0.875759	147.241	0.920554	1.3459	High confidence
AZD-7762	4 cell line mix	Kinobeads	MAP3K11	1	1.24951	1.21591	1.22907	0.873966	0	0	0	0	3256100	Normalized LFQ intensity	6.89096	-0.00149962	1.17362	116.837	116.837	71.4721	0.696515	81.379	0.985784	-12.0434	High confidence
AZD-7762	4 cell line mix	Kinobeads	MAP4K1	1	2.68989	3.87273	2.23127	1.54257	0	0	0	0	588500	Normalized Intensity	3.98878	-0.00395606	2.45276	113.817	113.817	76.3335	0.726208	82.6549	0.740706	29.731	Low confidence
AZD-7762	4 cell line mix	Kinobeads	MAP4K2	1	1.63335	1.79492	1.1777	0.616794	0.208878	0	0	0	8532300	Normalized LFQ intensity	1.82332	0.0103022	1.45827	84.8183	84.8183	39.5743	0.590017	50.0442	0.905164	8.26003	High confidence
AZD-7762	4 cell line mix	Kinobeads	MAP4K3	1	1.88534	1.7703	2.07588	1.51041	1.06532	0.636722	0	0	7919400	Normalized LFQ intensity	1.45029	-0.00205616	1.66885	554.315	554.315	407.116	0.655746	363.49	0.846216	14.0803	High confidence
AZD-7762	4 cell line mix	Kinobeads	MAP4K4	1	1.82106	1.77041	1.20691	0	0	0	0	0	1367100	Normalized LFQ intensity	7.91976	-0.00170019	1.53049	35.4323	35.4323	48.8402	1.01351	35.4323	0.918117	9.01839	High confidence
AZD-7762	4 cell line mix	Kinobeads	MAP4K5	1	2.07179	2.13859	1.98476	1.30009	0.827017	0.331067	0.143148	0	63794000	Normalized LFQ intensity	1.42994	0.0306455	1.79183	265.282	265.282	211.275	0.744124	197.402	0.833498	16.1958	High confidence
AZD-7762	4 cell line mix	Kinobeads	MARK2	1	1.32968	1.3514	1.38823	1.05828	0.870774	0.445958	0.196076	0.0159328	100800000	Normalized LFQ intensity	1.19521	0.0149195	1.26184	587.352	587.352	264.967	0.753322	442.465	0.945931	-2.72561	High confidence
AZD-7762	4 cell line mix	Kinobeads	MARK3	1	1.29934	1.3787	1.64612	1.28943	0.847288	0.231393	0.21165	0	13660000	Normalized LFQ intensity	1.89757	0.0275287	1.33675	415.887	415.887	201.678	0.770892	320.604	0.913749	4.08011	High confidence
AZD-7762	4 cell line mix	Kinobeads	MARK4	1	1.92321	1.02952	1.42226	0.987933	1.28548	0	0	0	230380	Normalized Intensity	8.84491	-0.0019834	1.27543	570.869	570.869	1719.91	0.831452	474.65	0.831098	13.0183	High confidence
AZD-7762	4 cell line mix	Kinobeads	MELK	1	1.403	1.47675	1.786	1.24627	1.29112	1.10577	1.01153	0	4579900	Normalized LFQ intensity	1.46599	-0.0020761	1.35832	5128.98	5128.98	4260.98	0.883754	4532.76	0.809201	7.94765	High confidence
AZD-7762	4 cell line mix	Kinobeads	MYLK3	1	1.31044	0.921236	0.775812	0.682323	1.12633	0.84951	0.628715	0	400690	Normalized Intensity	1.79737	-0.00480853	0.964337	4190.6	4190.6	4026.79	0.870308	3647.11	0.756976	4.93531	Low confidence
AZD-7762	4 cell line mix	Kinobeads	PAG1	1	1.31855	1.64961	1.50772	1.22803	1.032	0.513873	0.368592	0	8180800	Normalized LFQ intensity	1.13227	-0.00162747	1.36907	806.213	806.213	599.82	0.49264	397.173	0.888244	5.10512	High confidence
AZD-7762	4 cell line mix	Kinobeads	PAK4	1	1.32406	1.27466	1.24875	0.856493	0.601265	0.326352	0.167791	0.0173011	172380000	Normalized LFQ intensity	1.11191	0.0589135	1.22572	276.074	276.074	130.103	0.600921	165.899	0.953299	-4.56616	High confidence
AZD-7762	4 cell line mix	Kinobeads	PDCD10	1	2.993	2.3979	1.88035	2.19304	1.30109	1.15153	0.748085	0.415707	1370700	Normalized Intensity	1.11486	0.460477	2.11434	581.228	581.228	1063.18	1.07008	581.228	0.598303	24.3251	High confidence
AZD-7762	4 cell line mix	Kinobeads	PDGFRB	1	2.25398	2.16117	2.48361	1.58988	2.08885	0	0	0	2482000	Normalized LFQ intensity	9.69174	-0.00256243	1.9298	631.725	631.725	1195.5	0.873974	552.111	0.834977	20.2288	High confidence
AZD-7762	4 cell line mix	Kinobeads	PDPK1;PDPK2P	1	1.94232	2.16133	1.40229	0.96839	0	0	0	0	5716500	Normalized LFQ intensity	2.83474	-0.0208943	1.6415	111.334	111.334	42.0628	1.04203	111.334	0.866192	14.9845	High confidence
AZD-7762	4 cell line mix	Kinobeads	PKN1	1	1.48809	1.29525	1.4846	1.50437	1.50635	1.07423	0.733757	0.224254	12581000	Normalized LFQ intensity	1.63722	0.212761	1.37635	2470.51	2470.51	1330.32	0.874092	2159.45	0.854626	3.38809	High confidence
AZD-7762	4 cell line mix	Kinobeads	PKN2	1	1.4125	1.44212	1.33219	1.87747	1.62502	1.18022	1.0097	0.318247	4827800	Normalized LFQ intensity	1.58476	0.285814	1.43647	3792.97	3792.97	3546.63	0.815959	3094.91	0.710441	9.81278	High confidence
AZD-7762	4 cell line mix	Kinobeads	PLK4	1	1.36623	2.22576	1.35641	1.57267	1.23955	0.623813	0.734883	0	2732800	Normalized LFQ intensity	0.946619	-0.00202861	1.52039	1418.55	1418.55	2553.43	0.509269	722.426	0.694881	16.5973	High confidence
AZD-7762	4 cell line mix	Kinobeads	PRKAA1	1	1.2112	1.18554	1.24112	1.07837	1.00861	0.594144	0.455552	0.100032	359190000	Normalized LFQ intensity	1.07194	0.0916356	1.16433	1195	1195	531.038	0.637811	762.185	0.957043	-9.39845	High confidence
AZD-7762	4 cell line mix	Kinobeads	PRKAB1	1	1.2451	1.45971	1.43723	1.25686	1.08758	0.650093	0.408207	0.0978549	132800000	Normalized LFQ intensity	1.29762	0.114399	1.29095	999.772	999.772	535.331	0.662068	661.917	0.917131	-0.329726	High confidence
AZD-7762	4 cell line mix	Kinobeads	PRKAB2	1	1.42642	1.23239	1.35442	1.29976	0.998758	0.448643	0.34881	0.0459097	27221000	Normalized LFQ intensity	1.58541	0.127402	1.27215	640.092	640.092	307.874	0.601053	384.729	0.929227	-0.797831	High confidence
AZD-7762	4 cell line mix	Kinobeads	PRKAG1	1	1.39016	1.36408	1.39207	1.19784	0.995642	0.624442	0.447907	0.104725	630800000	Normalized LFQ intensity	1.06729	0.109117	1.29098	927.684	927.684	565.043	0.632872	587.105	0.924062	-1.67768	High confidence
AZD-7762	4 cell line mix	Kinobeads	PRKAG2	1	1.3304	1.29722	1.55121	1.25009	1.25554	0.642964	0.459363	0	7526200	Normalized LFQ intensity	1.26912	-0.00152986	1.30531	1387.75	1387.75	866	0.644818	894.846	0.900069	2.45621	High confidence
AZD-7762	4 cell line mix	Kinobeads	PRKCD	1	1.11149	1.44223	1.46585	1.59856	1.57368	0.965882	0.63159	0.602553	4072500	Normalized LFQ intensity	6.41288	0.616706	1.36531	979.651	979.651	230.608	0.947106	927.833	0.738012	6.27769	Low confidence
AZD-7762	4 cell line mix	Kinobeads	PRKD2	1	1.35982	2.36454	1.58942	1.46846	1.38562	1.03389	0.661702	0.142054	46801000	Normalized LFQ intensity	1.1237	0.101013	1.56945	1761.36	1761.36	2253.86	0.659146	1161	0.674525	16.8665	High confidence
AZD-7762	4 cell line mix	Kinobeads	PRKD3	1	1.04526	1.33153	1.53375	1.51008	1.47305	0.941332	0.687272	0	6991900	Normalized LFQ intensity	1.51046	-0.00152713	1.30678	2885.31	2885.31	1878.51	0.740225	2135.78	0.831694	6.73275	High confidence
AZD-7762	4 cell line mix	Kinobeads	PRKX;PRKY	1	1.11746	1.1575	1.31938	0.987057	0.732125	0.351023	0	0	5240400	Normalized LFQ intensity	1.41148	-0.0276121	1.14129	505.736	505.736	162.716	0.812178	410.748	0.964958	-7.04697	High confidence
AZD-7762	4 cell line mix	Kinobeads	PTK2	1	1.40043	1.4226	1.45554	1.2944	1.22745	0.876295	0.830764	0.357878	723550000	Normalized LFQ intensity	0.946097	0.291569	1.32417	2322.39	2322.39	2663.1	0.408006	947.546	0.840026	0.764002	High confidence
AZD-7762	4 cell line mix	Kinobeads	PTK2B	1	1.38467	1.42587	1.56012	1.32604	1.17042	0.76744	0.712863	0.245677	239720000	Normalized LFQ intensity	1.02722	0.233441	1.3491	1467.41	1467.41	1449.57	0.414584	608.365	0.848971	3.0516	High confidence
AZD-7762	4 cell line mix	Kinobeads	PTK6	1	1.62183	1.85106	1.64657	1.77975	1.72365	1.26168	0.793008	0	2716700	Normalized LFQ intensity	1.64086	-0.00183974	1.60016	2831.7	2831.7	1642.49	0.483081	1367.94	0.832751	10.4711	High confidence
AZD-7762	4 cell line mix	Kinobeads	Q6ZSR9	1	1.81043	1.96381	1.4171	0.875208	0.619037	0	0	0	19834000	Normalized LFQ intensity	1.40622	-0.00212346	1.57483	157.701	157.701	110.091	0.761466	120.084	0.86671	12.5973	High confidence
AZD-7762	4 cell line mix	Kinobeads	RASSF5	1	1.25217	1.40894	1.03774	0.757393	0	0	0	0	5583200	Normalized LFQ intensity	3.75906	-0.00200031	1.17763	116.252	116.252	26.0539	0.983194	114.298	0.962268	-3.17409	High confidence
AZD-7762	4 cell line mix	Kinobeads	RET	1	1.48892	1.15019	0.87636	0.328616	0.180598	0.0371098	0	0	84378000	Normalized LFQ intensity	1.5966	0.0283233	1.23996	52.628	52.628	19.5547	0.440569	23.1863	0.948183	-1.27845	High confidence
AZD-7762	4 cell line mix	Kinobeads	RPS6KA4	1	1.22883	1.29978	1.3113	1.1881	1.09846	0.714611	0.524567	0.157685	62502000	Normalized LFQ intensity	1.15679	0.146387	1.21788	1423.74	1423.74	696.136	0.617388	879	0.93958	-6.31274	High confidence
AZD-7762	4 cell line mix	Kinobeads	RPS6KA6	1	1.22862	1.27636	1.22008	1.32846	1.16144	0.781797	0.726269	0.103259	61317000	Normalized LFQ intensity	0.965126	-0.0263589	1.2147	3586.93	3586.93	3235.55	0.421785	1512.91	0.91393	-3.42637	High confidence
AZD-7762	4 cell line mix	Kinobeads	SIK2	1	0.881002	0.529207	0.327803	0.104751	0.0463245	0	0	0	21845000	Normalized LFQ intensity	1.06172	0.000862158	1.01476	13.0792	13.0792	1.60325	0.518256	6.77838	0.995481	-29.8397	High confidence
AZD-7762	4 cell line mix	Kinobeads	SIK3	1	0.887011	0.792955	0.594569	0.359516	0.234769	0	0.0349111	0.0168974	4584500	Normalized Intensity	0.805641	-0.0123768	0.991909	52.8342	52.8342	10.6958	0.818608	43.2505	0.992929	-25.8275	High confidence
AZD-7762	4 cell line mix	Kinobeads	SLK	1	1.46921	1.47084	1.4998	1.45422	1.38445	0.705069	0.504285	0.0635741	169340000	Normalized LFQ intensity	1.48958	0.108233	1.3969	1227.69	1227.69	779.009	0.890695	1093.5	0.890003	4.07022	High confidence
AZD-7762	4 cell line mix	Kinobeads	SRC	1	1.08138	1.20399	1.15898	0.795734	0.588259	0.293289	0.193466	0.0470601	394640000	Normalized LFQ intensity	1.15499	0.0871729	1.11939	280.429	280.429	104.059	0.388259	108.879	0.968051	-10.1828	High confidence
AZD-7762	4 cell line mix	Kinobeads	STK10	1	1.44565	1.52028	1.43881	1.2114	0.800244	0.268855	0.120935	0	48665000	Normalized LFQ intensity	1.56687	0.0104233	1.35464	392.795	392.795	163.303	0.915468	359.591	0.93833	1.24657	High confidence
AZD-7762	4 cell line mix	Kinobeads	STK3	1	1.36231	1.47279	1.19693	0.631192	0.275804	0.0536554	0	0	59238000	Normalized LFQ intensity	1.69623	-0.00126324	1.28745	111.098	111.098	38.7015	0.764244	84.9058	0.95118	-0.704363	High confidence
AZD-7762	4 cell line mix	Kinobeads	STK4	1	1.2478	1.50955	1.1459	0.424653	0.268948	0.0868384	0.0149116	0	44880000	Normalized LFQ intensity	2.45024	0.0767361	1.25501	74.0078	74.0078	22.5546	0.762521	56.4325	0.93952	0.772828	High confidence
AZD-7762	4 cell line mix	Kinobeads	SYK	1	1.19768	1.21425	1.15352	0.980421	0.906421	0.642741	0.430714	0.0210698	116730000	Normalized LFQ intensity	0.797496	-0.087643	1.14607	1769.86	1769.86	944.171	0.838521	1484.06	0.969322	-12.2926	High confidence
AZD-7762	4 cell line mix	Kinobeads	TEC	1	1.33781	1.40526	1.31236	1.14551	1.23319	0.973947	0.918703	0.381447	59677000	Normalized LFQ intensity	0.830643	0.146018	1.25365	6484.93	6484.93	12705.9	0.402382	2609.42	0.846986	-2.31451	High confidence
AZD-7762	4 cell line mix	Kinobeads	TNIK	1	1.85202	2.9408	1.89733	0.832611	0	0	0	0	609120	Normalized Intensity	4.71903	-0.00281551	1.9247	94.4633	94.4633	55.0865	1.02305	94.4633	0.796429	22.497	High confidence
AZD-7762	4 cell line mix	Kinobeads	TNK2	1	1.49733	1.24169	1.42505	1.23699	1.1887	0.754419	0.710662	0	13380000	Normalized LFQ intensity	0.986585	-0.00149427	1.29133	2423.98	2423.98	1999.01	0.450162	1091.19	0.880172	2.54748	High confidence
AZD-7762	4 cell line mix	Kinobeads	ULK1	1	1.11125	1.24762	1.35441	1.18086	0	0	0	0	2828400	Normalized LFQ intensity	9.08987	-0.00144431	1.1804	172.759	172.759	156.098	0.668058	115.413	0.977139	-6.89717	High confidence
AZD-7762	4 cell line mix	Kinobeads	ULK3	1	1.45611	1.31034	1.42075	1.41957	1.41696	0.994974	0.904058	0.284263	79958000	Normalized LFQ intensity	1.15559	0.191059	1.33371	3940.2	3940.2	4132.33	0.453962	1788.7	0.841744	1.73251	High confidence
AZD-7762	4 cell line mix	Kinobeads	YES1	1	1.38115	1.19197	1.79304	0.912981	0.920901	0.666368	0.387343	0	23067000	Normalized LFQ intensity	0.893607	-0.0333525	1.29857	1052.28	1052.28	1338.78	0.41317	434.77	0.791806	9.92539	High confidence
AZD-8055	4 cell line mix	Kinobeads	CNOT2	1	1.17038	0.829593	0.730851	0.28731	0.23374	0.199488	0.31623	0.139893	3689400	Normalized Intensity	1.54973	0.208538	1.05908	32.853	32.853	11.7097	1.38243	32.853	0.953029	-9.03578	Low confidence
AZD-8055	4 cell line mix	Kinobeads	FECH	1	1.02582	1.13043	0.95218	1.0443	1.01851	0.888644	0.780562	0.256052	71808000	Normalized LFQ intensity	1.04682	0.093368	1.03394	6930.63	6930.63	5513.32	0.994935	6895.53	0.964216	-18.6734	High confidence
AZD-8186	4 cell line mix	Kinobeads	ERN2	1	0.745512	0.906111	0.807003	0.850863	1.13608	0.76405	0.477602	0.30693	6840000	Normalized Intensity	2.4165	0.313459	0.903721	1915.34	1915.34	1124.13	0.783383	1500.45	0.795046	-3.51199	Low confidence
AZD-8186	4 cell line mix	Kinobeads	NPM1	1	0.947051	0.732708	1.05302	0.960456	0.773995	0.522835	0.453237	0.390462	286790000	Normalized LFQ intensity	1.97147	0.415691	0.940937	481.78	481.78	281.128	1.30523	481.78	0.875187	-8.09899	High confidence
AZD-8186	4 cell line mix	Kinobeads	TOP2B	1	0.804408	0.664482	1.11998	0.975729	0.732307	0.547022	0.187675	0.170148	37148000	Normalized LFQ intensity	1.73729	0.144093	0.905039	936.085	936.085	542.712	1.19774	936.085	0.845505	-0.79541	High confidence
AZD-8330	4 cell line mix	Kinobeads	EIF2AK1	1	0.829642	0.942515	0.757439	0.75296	0.802304	0.966618	0	0	2596400	Normalized LFQ intensity	14.2181	-0.00167788	0.864508	1975.65	1975.65	5318.42	0.921519	1820.6	0.947917	-8.00535	Low confidence
AZD-8330	4 cell line mix	Kinobeads	MAP2K1	1	1.66934	1.09817	0.531795	0	0	0	0	0.111015	24513000	Normalized LFQ intensity	2.40673	0.0158367	1.30844	24.3794	24.3794	8.56508	1.23132	24.3794	0.919704	4.31321	High confidence
AZD-8330	4 cell line mix	Kinobeads	MAP2K2	1	1.09193	0.710055	0.215285	0.013622	0.0168303	0	0.0161277	0.0271495	60637000	Normalized LFQ intensity	2.14959	0.0136468	1.0555	14.5267	14.5267	1.3603	1.17379	14.5267	0.994276	-25.0319	High confidence
AZD-8330	4 cell line mix	Kinobeads	MAP2K5	1	1.64611	1.49962	1.58454	1.55212	1.34458	1.20266	0.893132	0.364297	40172000	Normalized LFQ intensity	1.24622	0.30428	1.45008	3033.56	3033.56	2848.78	0.875759	2656.66	0.80134	5.26664	High confidence
Bafetinib	4 cell line mix	Kinobeads	ABL1	1	0.594796	1.04552	0.531689	0.244051	0.0140123	0.00442674	0.00544619	0.0058544	91125000	Normalized LFQ intensity	1.77366	0.0047606	0.879474	48.1404	48.1404	25.4709	0.547922	26.3772	0.898477	-0.366937	High confidence
Bafetinib	4 cell line mix	Kinobeads	ABL2	1	1.4403	0.753886	0.681498	0.13867	0.0140921	0.00909394	0	0	89351000	Normalized LFQ intensity	1.42165	-0.00148514	1.17049	29.7621	29.7621	14.7619	0.331378	9.86248	0.920543	1.51554	High confidence
Bafetinib	4 cell line mix	Kinobeads	ARAF	1	1.15244	0.994895	1.23549	1.13029	0.979753	0.925658	0.771022	0.377449	4710000	Normalized LFQ intensity	0.924421	0.251044	1.09877	4643.88	4643.88	5723.98	0.623067	2893.45	0.903374	-10.1518	High confidence
Bafetinib	4 cell line mix	Kinobeads	BCR	1	1.80287	1.02115	0.779508	0.215314	0	0.39004	0	0	19161000	Normalized LFQ intensity	1.79729	0.0925454	1.34309	30.4944	30.4944	18.9502	0.477847	14.5717	0.838895	10.4582	High confidence
Bafetinib	4 cell line mix	Kinobeads	BRAF	1	1.08098	1.10356	1.04163	0.953944	0.924611	0.597031	0.326811	0.111398	19564000	Normalized LFQ intensity	1.19606	0.0934291	1.05409	1134.52	1134.52	195.796	1.11087	1134.52	0.990174	-24.434	High confidence
Bafetinib	4 cell line mix	Kinobeads	CDC23	1	1.74928	1.16195	1.62327	1.06483	1.5175	0.856762	0.638905	0.154354	983260	Normalized Intensity	1.30119	0.136856	1.35973	1925.04	1925.04	2029.67	1.00879	1925.04	0.729444	11.4419	Low confidence
Bafetinib	4 cell line mix	Kinobeads	CSK	1	0.82701	0.862383	0.840303	0.861101	0.794203	0.833068	0.753016	0.43162	1033500000	Normalized LFQ intensity	3.72263	0.431684	0.860298	4001.86	4001.86	NA	0.538187	2153.75	0.862377	-16.0905	High confidence
Bafetinib	4 cell line mix	Kinobeads	DDR1	1	0.859064	0.725142	0.424696	0	0	0	0	0	11500000	Normalized LFQ intensity	1.59296	-0.00231271	0.945969	23.0359	23.0359	4.00378	0.627266	14.4497	0.98926	-20.7811	High confidence
Bafetinib	4 cell line mix	Kinobeads	DDR2	1	1.18923	0.957112	0.851078	0.322948	0.0245968	0	0	0	33472000	Normalized LFQ intensity	1.79206	-0.00923117	1.06704	62.6345	62.6345	10.7449	0.762065	47.7316	0.987037	-15.8461	High confidence
Bafetinib	4 cell line mix	Kinobeads	EPHA2	1	0.736021	0.737586	0.694828	0.657717	0.396555	0.160873	0.0859013	0.0500143	52263000	Normalized LFQ intensity	0.582528	-0.0495389	0.918229	217.932	217.932	145.86	0.412958	89.9966	0.953984	-11.6623	High confidence
Bafetinib	4 cell line mix	Kinobeads	EPHA4	1	1.06103	0.944761	0.715339	0.974774	0.845113	0.950188	0.709196	0.329912	6356400	Normalized LFQ intensity	8.10775	0.329911	0.927321	3211.87	3211.87	3001.31	0.616594	1980.42	0.809216	-6.21483	High confidence
Bafetinib	4 cell line mix	Kinobeads	EPHA5	1	1.25627	1.16265	1.11739	1.13916	0.816645	0	0.67953	0	3754400	Normalized LFQ intensity	0.907586	-0.00072736	1.18266	576.525	576.525	NA	0.598997	345.337	0.744289	10.2086	Low confidence
Bafetinib	4 cell line mix	Kinobeads	EPHB2	1	1.01064	0.991793	1.0081	1.00328	0.893783	0.875316	0.798714	0.251679	276720000	Normalized LFQ intensity	0.634503	-1.36968	1.00481	101472	101472	188609	0.524262	53198.1	0.990143	-31.4983	High confidence
Bafetinib	4 cell line mix	Kinobeads	EPHB3	1	0.993304	1.06516	0.879501	0.918353	0.97822	0.837164	0.635547	0	8728500	Normalized LFQ intensity	1.2788	-0.0907665	0.976186	5190.38	5190.38	2617.05	0.87586	4546.05	0.974377	-17.5117	High confidence
Bafetinib	4 cell line mix	Kinobeads	EPHB4	1	1.02817	0.963204	1.13155	0.99079	0.929778	0.671983	0.594303	0.201568	19254000	Normalized LFQ intensity	0.840054	0.103597	1.03759	2625.9	2625.9	1813.66	0.494832	1299.38	0.958811	-15.3211	High confidence
Bafetinib	4 cell line mix	Kinobeads	FRK	1	0.943665	0.890983	1.03352	0.844496	0.780325	0.58617	0.433182	0.203637	159910000	Normalized LFQ intensity	0.794086	0.144561	0.975619	1259.07	1259.07	596.887	0.339663	427.66	0.9735	-20.0008	High confidence
Bafetinib	4 cell line mix	Kinobeads	FYN	1	0.945409	0.933097	0.86517	0.948147	0.911	0.773116	0.626635	0.331939	95646000	Normalized LFQ intensity	0.987715	0.261737	0.946643	3350.66	3350.66	1867.57	0.431007	1444.16	0.973138	-24.8666	High confidence
Bafetinib	4 cell line mix	Kinobeads	GRB2	1	0.78677	0.973135	0.551477	0.258717	0.224841	0.198013	0.246812	0.215236	6577100	Normalized LFQ intensity	9.20141	0.228721	0.919976	29.5712	29.5712	3.1368	0.623754	18.4451	0.968408	-15.0062	High confidence
Bafetinib	4 cell line mix	Kinobeads	INPPL1	1	1.06294	0.861485	0.505372	0	0	0	0	0	3743900	Normalized LFQ intensity	2.14912	-0.00142913	1.01587	28.1859	28.1859	2.87953	0.483409	13.6253	0.993849	-23.6769	High confidence
Bafetinib	4 cell line mix	Kinobeads	IRAK1	1	0.971211	1.18767	1.08829	1.15041	1.09014	1.01178	0.852975	0.58041	12588000	Normalized LFQ intensity	1.69473	0.568419	1.08137	3373.82	3373.82	1798.11	0.610351	2059.22	0.86945	-13.2928	Low confidence
Bafetinib	4 cell line mix	Kinobeads	LCK	1	1.01703	1.02652	0.912331	0.850888	0.657178	0.483658	0.312299	0.114397	342740000	Normalized LFQ intensity	0.730708	0.0633876	1.0275	667.169	667.169	133.205	0.440511	293.895	0.995328	-32.4294	High confidence
Bafetinib	4 cell line mix	Kinobeads	LYN	1	0.984803	0.931	0.895539	0.863945	0.628816	0.342363	0.235127	0.083811	355000000	Normalized LFQ intensity	1.0098	0.0824751	0.978502	475.423	475.423	76.6227	0.501873	238.602	0.994113	-29.4094	High confidence
Bafetinib	4 cell line mix	Kinobeads	MAP2K5	1	0.801432	0.825294	0.789145	0.905666	0.831235	0.742943	0.706082	0.402554	15617000	Normalized LFQ intensity	0.704184	0.148551	0.872079	13008.5	13008.5	37535	0.875759	11392.3	0.850329	-14.0229	High confidence
Bafetinib	4 cell line mix	Kinobeads	MAPK11	1	1.56408	0.944361	1.32629	1.05307	1.2601	1.02777	0.828681	0.552663	2252300	Normalized LFQ intensity	1.51757	0.545197	1.19364	2380.9	2380.9	2684.54	0.723785	1723.26	0.592572	5.38307	Low confidence
Bafetinib	4 cell line mix	Kinobeads	MAPK14	1	0.879782	0.95928	0.799023	0.859581	0.624797	0.497638	0.309095	0.0999145	597480000	Normalized LFQ intensity	0.627946	-0.00991444	0.963731	1047.24	1047.24	657.543	0.512104	536.297	0.975053	-18.7472	High confidence
Bafetinib	4 cell line mix	Kinobeads	MAPKAPK2	1	0.900665	0.83422	0.786915	0.816287	0.616308	0.425014	0.230134	0.239432	7235900	Normalized LFQ intensity	0.987855	0.195905	0.909463	420.673	420.673	162.142	0.7227	304.02	0.96447	-16.993	High confidence
Bafetinib	4 cell line mix	Kinobeads	MAPKAPK3	1	0.740945	0.882242	0.354241	0	0	0	0	0	340700	Normalized Intensity	5.4313	-0.000974207	0.875542	27.9576	27.9576	4.95668	0.826554	23.1085	0.977035	-13.7581	High confidence
Bafetinib	4 cell line mix	Kinobeads	MYLK	1	1.07158	1.13945	1.36207	0.723462	1.01932	0.675096	0.668865	0.344112	79291000	Normalized Intensity	0.721033	0.283653	1.11234	1451.44	1451.44	2822.34	0.833234	1209.39	0.727385	2.67532	Low confidence
Bafetinib	4 cell line mix	Kinobeads	NQO2	1	1.13992	1.03262	1.05379	0.943023	0.902925	0.897719	1.02916	0.43904	90516000	Normalized LFQ intensity	8.05034	0.43908	0.999976	6868.93	6868.93	28500.6	1.06667	6868.93	0.854619	-10.6604	Low confidence
Bafetinib	4 cell line mix	Kinobeads	PDGFRB	1	1.22881	1.08604	1.36687	1.34703	1.45456	1.19866	0.843883	0.189	6900400	Normalized LFQ intensity	2.75928	0.18629	1.24492	3583.52	3583.52	1474.8	0.873974	3131.91	0.868931	0.000412022	High confidence
Bafetinib	4 cell line mix	Kinobeads	PIP4K2C	1	1.03185	0.968931	1.07189	1.21065	1.09156	1.00647	0.959362	0.531505	3827800	Normalized LFQ intensity	1.74606	0.49285	1.05881	6818.43	6818.43	9548.58	0.907123	6185.15	0.863835	-12.6732	Low confidence
Bafetinib	4 cell line mix	Kinobeads	RET	1	1.14579	1.07182	1.0554	1.2574	1.07884	0.964737	0.875746	0.443643	52062000	Normalized LFQ intensity	1.16969	0.356381	1.10208	5482.77	5482.77	5683.27	0.440569	2415.54	0.896373	-11.3114	High confidence
Bafetinib	4 cell line mix	Kinobeads	RIPK2	1	1.09152	1.14657	1.06414	1.00532	1.00362	1.00377	0.804109	0.363248	180850000	Normalized LFQ intensity	1.2955	0.290912	1.05934	5236.31	5236.31	5095.03	0.280618	1469.4	0.962689	-20.0693	High confidence
Bafetinib	4 cell line mix	Kinobeads	RIPK3	1	0.952586	1.01794	0.833007	0.758288	0.611195	0.412229	0	0	9007500	Normalized LFQ intensity	0.884509	-0.0756279	0.978607	566.048	566.048	212.891	0.894178	506.148	0.971487	-12.9735	High confidence
Bafetinib	4 cell line mix	Kinobeads	ZAK	1	1.06785	0.943023	0.850127	0.413991	0.273338	0.0733164	0	0	28679000	Normalized LFQ intensity	1.12593	0.0036502	1.044	87.5554	87.5554	16.8569	0.743597	65.1059	0.990211	-20.4865	High confidence
Barasertib	4 cell line mix	Kinobeads	AURKA	1	1.23048	1.41116	1.04214	0.762797	0.455898	0.419378	0.266067	0.0856899	91916000	Normalized LFQ intensity	1.21374	0.206117	1.21063	137.552	137.552	89.2868	0.353704	48.6528	0.917002	-0.943693	High confidence
Barasertib	4 cell line mix	Kinobeads	CSNK2A1;CSNK2A3	1	0.60129	1.42468	1.34585	1.33026	1.28241	1.74921	0	0.0267538	65653000	Normalized LFQ intensity	11.392	-0.00120008	1.24774	2070.52	2070.52	2971.53	1.01946	2070.52	0.752034	14.5282	Low confidence
Barasertib	4 cell line mix	Kinobeads	CSNK2A2	1	0.686873	1.89196	1.64442	1.45755	1.48793	2.31998	0.00797524	0.00631129	91087000	Normalized LFQ intensity	12.2401	0.00438067	1.49839	2022.47	2022.47	5240.88	0.962701	1947.03	0.662694	21.8422	Low confidence
Barasertib	4 cell line mix	Kinobeads	CSNK2B	1	0.834288	2.15146	1.8413	1.65634	1.78505	1.96458	0	0	39080000	Normalized LFQ intensity	11.7096	-0.00213535	1.60476	2044.41	2044.41	4144.19	1.08129	2044.41	0.730271	20.2764	Low confidence
Barasertib	4 cell line mix	Kinobeads	DYRK1A	1	1.09824	1.45851	1.23437	1.38881	1.43805	1.32502	0	0	8692400	Normalized LFQ intensity	10.107	-0.00164861	1.27797	1821.14	1821.14	2287.05	0.933007	1699.13	0.932238	1.54231	Low confidence
Barasertib	4 cell line mix	Kinobeads	EGFR	1	1.44256	1.71721	1.73442	1.26488	1.39517	0.855791	0.721248	0	6366600	Normalized LFQ intensity	1.06148	-0.00172465	1.45199	2186.85	2186.85	2125.75	0.793047	1734.27	0.819703	9.33296	High confidence
Barasertib	4 cell line mix	Kinobeads	EIF3J	1	0.536741	1.69173	1.56123	1.94888	2.00372	2.49159	0	0	21798000	Normalized LFQ intensity	14.1507	-0.00172121	1.60484	2094.19	2094.19	8371.94	1.10588	2094.19	0.608266	25.2823	Low confidence
Barasertib	4 cell line mix	Kinobeads	FLT3	1	2.80731	3.89933	2.25831	2.21137	1.72981	0.512935	0.275182	0	2852800	Normalized Intensity	1.57294	-0.00156114	2.48757	477.756	477.756	517.651	0.537356	256.725	0.672008	30.087	High confidence
Barasertib	4 cell line mix	Kinobeads	HCK	1	1.2468	1.11175	1.30593	1.10677	1.06857	0.997419	0.849888	0.42512	635990000	Normalized LFQ intensity	0.914972	0.272489	1.15569	5568.19	5568.19	7948.33	0.518348	2886.26	0.885676	-8.40059	High confidence
Barasertib	4 cell line mix	Kinobeads	LYN	1	1.16488	1.12064	1.17529	1.10606	1.02681	0.995505	0.854755	0.409872	1028800000	Normalized LFQ intensity	0.945721	0.230906	1.11112	7238.95	7238.95	7922.26	0.501873	3633.04	0.950689	-17.4926	High confidence
Barasertib	4 cell line mix	Kinobeads	MAP2K5	1	1.21859	1.72843	1.0373	0.796339	0.623284	0.453621	0.414874	0.365114	19383000	Normalized LFQ intensity	1.56698	0.419819	1.28473	93.3985	93.3985	84.969	0.875759	81.7946	0.793057	6.80936	High confidence
Barasertib	4 cell line mix	Kinobeads	MAP4K5	1	1.32598	1.23611	1.24396	1.18012	1.35364	0.942594	0.724035	0.202986	136270000	Normalized LFQ intensity	1.3947	0.167199	1.22078	3005.03	3005.03	1582.81	0.744124	2236.12	0.907189	-3.87672	High confidence
Barasertib	4 cell line mix	Kinobeads	MST1R	1	1.26807	1.21214	1.40622	1.18828	1.53197	1.07449	0.678689	0.461293	4053900	Normalized LFQ intensity	2.42645	0.470243	1.26359	1858.33	1858.33	1060.45	0.761926	1415.91	0.80776	1.2033	High confidence
Barasertib	4 cell line mix	Kinobeads	PDGFRB	1	1.35521	1.08982	1.43339	1.27258	1.13206	0.893339	0.68512	0	14301000	Normalized LFQ intensity	1.19721	-0.00271417	1.22441	3080.04	3080.04	1853.77	0.873974	2691.88	0.900395	-0.225448	High confidence
Barasertib	4 cell line mix	Kinobeads	RAB6A	1	0.69646	0.702983	0.541616	0	0	0	0	0.343429	9102900	Normalized LFQ intensity	7.13066	0.0680816	0.799944	32.6533	32.6533	26.1948	1.61943	32.6533	0.870379	-0.056487	Low confidence
Barasertib	4 cell line mix	Kinobeads	RET	1	1.39505	1.37335	1.29447	0.848865	0.908809	0.365563	0.0771282	0	45391000	Normalized LFQ intensity	1.14957	-0.00149951	1.25083	475.155	475.155	260.193	0.440569	209.339	0.922668	1.33709	High confidence
Barasertib	4 cell line mix	Kinobeads	RIPK2	1	1.33752	1.27883	1.42812	1.11208	1.20111	1.09981	0.941933	0.396876	404890000	Normalized LFQ intensity	1.0384	0.228498	1.23597	6591.06	6591.06	11868.1	0.280618	1849.57	0.837897	-2.39961	High confidence
Barasertib_HQPA	4 cell line mix	Kinobeads	AURKA	1	1.25735	1.23754	1.11843	0.926644	0.78532	0.696401	0.529939	0.266843	101720000	Normalized LFQ intensity	0.698525	0.220871	1.1699	806.218	806.218	768.025	0.353704	285.163	0.925851	-7.77603	High confidence
Barasertib_HQPA	4 cell line mix	Kinobeads	AURKB	1	0.818251	0	0	0	0	0	0	0	7793200	Normalized LFQ intensity	6.49266	0.00166221	1.00015	3.77967	3.77967	0.0362572	0.585272	2.21214	0.999978	-77.3907	High confidence
Barasertib_HQPA	4 cell line mix	Kinobeads	CSNK2A1;CSNK2A3	1	1.04597	1.24673	0.917542	1.07292	0.886347	0.879795	0.547109	0.108925	101890000	Normalized LFQ intensity	0.93944	-0.029106	1.05953	3746.56	3746.56	4137.86	1.01946	3746.56	0.922567	-7.069	High confidence
Barasertib_HQPA	4 cell line mix	Kinobeads	CSNK2A2	1	1.19791	1.49575	1.22779	1.38596	1.0158	0.990137	0.495483	0.0370946	149030000	Normalized LFQ intensity	1.32705	-0.00378077	1.24462	2302.56	2302.56	1226.31	0.962701	2216.67	0.893416	1.19226	High confidence
Barasertib_HQPA	4 cell line mix	Kinobeads	CSNK2B	1	1.13223	1.64546	1.48801	1.44937	0.97764	1.39608	0.786604	0.0559301	66776000	Normalized LFQ intensity	6.49608	0.0558865	1.29847	3169.52	3169.52	1002.8	1.08129	3169.52	0.781829	8.6928	High confidence
Barasertib_HQPA	4 cell line mix	Kinobeads	EGFR	1	0.832166	1.31038	1.19655	1.20879	0.724476	0.97355	0.4949	0.110129	11907000	Normalized LFQ intensity	1.10528	0.0313275	1.08189	2844.01	2844.01	3186.65	0.793047	2255.43	0.781064	4.5985	High confidence
Barasertib_HQPA	4 cell line mix	Kinobeads	EIF2AK1	1	0.727679	1.34239	1.24167	1.15239	1.03611	0.963714	0.76103	0	4670900	Normalized LFQ intensity	1.74708	-0.00137359	1.07973	4694.69	4694.69	3977.09	0.921519	4326.25	0.813161	3.77724	Low confidence
Barasertib_HQPA	4 cell line mix	Kinobeads	EIF3J	1	1.0294	1.64118	1.27697	1.34277	1.13615	1.55917	0.58896	0.0445429	43221000	Normalized LFQ intensity	7.87636	0.0444643	1.28368	2909.03	2909.03	494.92	1.10588	2909.03	0.810645	7.90744	High confidence
Barasertib_HQPA	4 cell line mix	Kinobeads	FLT3	1	1.28963	1.07936	0.867231	0.960388	0.435682	0.136411	0.130187	0	4428000	Normalized Intensity	1.54803	0.0437811	1.08739	237.265	237.265	82.0061	0.537356	127.495	0.947878	-4.24234	High confidence
Barasertib_HQPA	4 cell line mix	Kinobeads	KLHL6	1	0.988568	1.08085	0.756001	1.33698	1.1885	1.23092	0.659419	0.0930584	6324200	Normalized Intensity	5.93362	0.0939945	1.08333	3149.27	3149.27	649.691	0.740829	2333.07	0.809502	3.14851	Low confidence
Barasertib_HQPA	4 cell line mix	Kinobeads	LCK	1	1.20205	1.29313	1.1291	0.992881	1.02149	0.902535	0.821465	0.374048	1057600000	Normalized LFQ intensity	0.693238	0.141901	1.14422	6111.79	6111.79	8438.53	0.440511	2692.31	0.887518	-7.98101	High confidence
Barasertib_HQPA	4 cell line mix	Kinobeads	MAP2K5	1	1.14038	1.1731	0.999307	0.741343	0.637613	0.434374	0.262509	0	15359000	Normalized LFQ intensity	0.729212	-0.00120107	1.11632	462.252	462.252	258.961	0.875759	404.821	0.966213	-11.0093	High confidence
Barasertib_HQPA	4 cell line mix	Kinobeads	MAP4K5	1	1.15497	1.09363	1.06525	0.886022	0.832424	0.565438	0.339244	0.0443579	162500000	Normalized LFQ intensity	0.789917	-0.0357357	1.09037	1210.02	1210.02	449.181	0.744124	900.406	0.982351	-18.2147	High confidence
Barasertib_HQPA	4 cell line mix	Kinobeads	MST1R	1	1.39742	1.71855	1.49709	1.06838	1.14786	1.09026	0.736229	0	8529800	Normalized LFQ intensity	1.12291	-0.00978359	1.33354	3291.05	3291.05	2937.53	0.761926	2507.54	0.811363	7.87859	High confidence
Barasertib_HQPA	4 cell line mix	Kinobeads	PTK6	1	1.18203	1.20564	0.941709	0.86624	0.983742	0.854244	0	0	5322500	Normalized LFQ intensity	12.9686	-0.00144048	1.0299	1129.87	1129.87	NA	0.483081	545.821	0.945742	-4.75904	High confidence
Barasertib_HQPA	4 cell line mix	Kinobeads	RET	1	1.18518	1.16594	1.22932	0.944843	1.04226	0.854437	0.516168	0.0476272	65556000	Normalized LFQ intensity	1.04815	-0.045504	1.12086	2901.92	2901.92	1665.83	0.440569	1278.5	0.951597	-9.10995	High confidence
Baricitinib	4 cell line mix	Kinobeads	AAK1	1	1.11934	0.804504	0.694392	0.530616	0.234002	0.139398	0.0546833	0.0704237	703520000	Normalized LFQ intensity	0.865883	0.0436127	1.0509	69.0325	69.0325	25.9822	0.673073	46.4639	0.974609	-13.6324	High confidence
Baricitinib	4 cell line mix	Kinobeads	AP2A1	1	0.949089	0.719774	0.698678	0.654786	0.26875	0.176111	0.0875968	0.114263	79941000	Normalized LFQ intensity	0.735239	0.0507117	0.974004	103.35	103.35	56.8152	0.918545	94.932	0.958425	-11.5391	High confidence
Baricitinib	4 cell line mix	Kinobeads	AP2A2	1	0.834685	0.763269	0.225143	0.663797	0.120493	0	0	0.0709766	6782800	Normalized Intensity	0.637393	-0.00103756	1.00375	32.1179	32.1179	41.9363	0.937034	30.0956	0.825515	3.308	High confidence
Baricitinib	4 cell line mix	Kinobeads	AP2B1	1	1.01662	0.988027	0.881361	0.819734	0.777054	0.486143	0.518893	0.644258	55763000	Normalized LFQ intensity	1.16253	0.55059	0.995893	153.137	153.137	113.687	1.0069	153.137	0.896822	-13.6382	High confidence
Baricitinib	4 cell line mix	Kinobeads	BMP2K	1	1.02222	0.861241	0.901533	0.731532	0.519208	0.342579	0.149067	0.0715627	160720000	Normalized LFQ intensity	0.784306	0.0334261	0.999168	326.795	326.795	85.004	0.660952	215.996	0.989482	-23.6672	High confidence
Baricitinib	4 cell line mix	Kinobeads	CAMK2D	1	1.06967	0.89743	1.04265	0.999152	0.901298	0.725828	0.22266	0.0454665	3122800000	Normalized LFQ intensity	1.98259	0.0362386	0.99409	1530.42	1530.42	247.276	0.203913	312.074	0.981093	-17.8665	High confidence
Baricitinib	4 cell line mix	Kinobeads	CAMK2G	1	1.25447	1.05798	1.12451	1.06386	1.02076	0.6338	0.160265	0.042636	809010000	Normalized LFQ intensity	1.97372	0.0359257	1.10145	1118.29	1118.29	208.672	0.217204	242.897	0.975932	-12.878	High confidence
Baricitinib	4 cell line mix	Kinobeads	CIT	1	1.12636	0.88706	0.987916	1.0922	0.820124	0.874691	0.585728	0.178582	341120000	Normalized LFQ intensity	0.913149	0.0326825	1.01381	4361.01	4361.01	6000.94	1.21394	4361.01	0.916893	-8.85934	High confidence
Baricitinib	4 cell line mix	Kinobeads	CLK1	1	1.26459	0.851355	1.17343	1.37638	0	0.812105	0.573576	0	16778000	Normalized LFQ intensity	0.5986	-0.00102936	1.12757	1087.26	1087.26	5189.23	0.715477	777.913	0.49828	17.0451	Low confidence
Baricitinib	4 cell line mix	Kinobeads	CSNK1G1	1	0.876785	0.706671	1.01965	1.20864	0.861826	1.185	0	0	7224600	Normalized LFQ intensity	12.7887	-0.00484002	0.979802	2025.65	2025.65	4219.3	0.865559	1753.32	0.884143	2.07029	Low confidence
Baricitinib	4 cell line mix	Kinobeads	CSNK1G2	1	0.890804	1.13849	1.07181	1.13508	0.544788	0	0	0	4857300	Normalized Intensity	10.7462	-0.000424367	1.04724	302.289	302.289	25.2024	0.875279	264.588	0.979458	-11.4937	Low confidence
Baricitinib	4 cell line mix	Kinobeads	CSNK2B	1	1.09248	1.14261	1.31205	1.44063	1.0197	0.93165	0.745028	0.366438	162820000	Normalized LFQ intensity	1.19143	0.33222	1.18007	2521.2	2521.2	2264.98	1.08129	2521.2	0.811114	-0.350711	High confidence
Baricitinib	4 cell line mix	Kinobeads	DNAJB11	1	0.860062	1.2149	0.691389	0.369267	0.429224	0.10841	0	0.256644	5143700	Normalized Intensity	1.45401	0.161258	1.02368	56.4234	56.4234	43.9262	1.59397	56.4234	0.871505	1.25859	Low confidence
Baricitinib	4 cell line mix	Kinobeads	EIF2AK1	1	1.08585	0.798479	0.796561	0.866799	0.628532	0	0	0	28075000	Normalized LFQ intensity	4.11327	-0.00161308	0.910688	363.947	363.947	139.916	0.921519	335.384	0.959283	-7.71336	High confidence
Baricitinib	4 cell line mix	Kinobeads	EWSR1	1	0.691583	0.854507	0	0	0	0	0	0	5748800	Normalized LFQ intensity	12.148	-0.00136597	0.84883	18.7603	18.7603	47.5902	1.6541	18.7603	0.967996	-10.6471	Low confidence
Baricitinib	4 cell line mix	Kinobeads	GAK	1	0.9672	0.829406	0.957733	1.03946	0.767565	0.820234	0.640436	0.293949	914030000	Normalized LFQ intensity	0.681216	0.00833043	0.959368	8657.87	8657.87	30762.4	0.56156	4861.91	0.897418	-11.2842	High confidence
Baricitinib	4 cell line mix	Kinobeads	KLHL6	1	0.886123	1.10273	1.04986	1.19923	0.422242	0.304446	0.276883	0.132043	14621000	Normalized Intensity	10.5665	0.23778	1.04759	267.269	267.269	166.073	0.740829	198.001	0.948647	-6.98562	Low confidence
Baricitinib	4 cell line mix	Kinobeads	MAP3K1	1	1.12014	0.838561	0.922853	1.08478	0.703948	0.762626	0.667131	0.43758	273210000	Normalized LFQ intensity	0.492918	0.25027	1.0225	3276.55	3276.55	12771.7	0.577183	1891.17	0.772487	-5.11395	High confidence
Baricitinib	4 cell line mix	Kinobeads	MARK2	1	1.12319	0.906372	0.860245	0.69204	0.378859	0.212113	0.0346908	0.0779404	382550000	Normalized LFQ intensity	0.981807	0.0374894	1.03649	166.14	166.14	46.6369	0.753322	125.157	0.982353	-16.5945	High confidence
Baricitinib	4 cell line mix	Kinobeads	MARK3	1	1.16341	0.855216	0.702167	0.576713	0.37009	0.305802	0	0	49067000	Normalized LFQ intensity	0.656937	-0.0383886	1.07646	134.689	134.689	90.0495	0.770892	103.83	0.954821	-8.14055	High confidence
Baricitinib	4 cell line mix	Kinobeads	PDPK1;PDPK2P	1	0.974277	0.979409	0.973338	1.03417	0.902303	1.094	0.705407	0	27738000	Normalized LFQ intensity	8.95951	-0.000681932	0.993931	3315.17	3315.17	1491.15	1.04203	3315.17	0.976808	-17.9775	High confidence
Baricitinib	4 cell line mix	Kinobeads	PIP4K2A;PIP4K2B	1	1.86624	1.39285	1.27557	1.0105	0.681064	0.185706	0.402297	0.436636	4563300	Normalized Intensity	1.60444	0.344586	1.40802	144.831	144.831	108.603	0.873039	126.443	0.812732	9.39469	High confidence
Baricitinib	4 cell line mix	Kinobeads	PKN1	1	1.18801	0.891763	0.822513	0.711653	0.387435	0	0.238639	0.245469	52844000	Normalized LFQ intensity	1.31713	0.158591	1.02824	118.549	118.549	72.3919	0.874092	103.623	0.91814	-3.31836	High confidence
Baricitinib	4 cell line mix	Kinobeads	PKN2	1	0.6915	0.814992	0.812465	0.759906	0.474806	0	0	0	15604000	Normalized LFQ intensity	2.9438	-0.00213585	0.821702	329.521	329.521	62.4362	0.815959	268.876	0.960687	-10.0029	High confidence
Baricitinib	4 cell line mix	Kinobeads	PPP4R2	1	0.94778	0.676024	0.570939	0.542458	0	0	0	0	5870100	Normalized LFQ intensity	0.808295	-0.0562504	0.987155	56.358	56.358	34.7593	1.14303	56.358	0.94268	-5.80073	Low confidence
Baricitinib	4 cell line mix	Kinobeads	PRKACA	1	1.16059	1.12934	1.15205	1.09382	0.876178	0.987437	0.717404	0.249082	398050000	Normalized LFQ intensity	0.773383	-0.0458355	1.1049	7650.99	7650.99	12207.5	0.470095	3596.7	0.932128	-10.8119	High confidence
Baricitinib	4 cell line mix	Kinobeads	PRKCA	1	1.0423	0.689781	0.906272	0.964549	0.871843	0.672937	0.432855	0	61111000	Normalized LFQ intensity	1.15204	-0.0541458	0.925608	2843.97	2843.97	1891.47	0.728153	2070.85	0.912499	-6.09426	High confidence
Baricitinib	4 cell line mix	Kinobeads	PRKCB	1	1.00723	0.809897	0.906813	1.0333	0.785203	0.776874	0.675401	0.245451	160570000	Normalized LFQ intensity	0.55365	-0.499966	0.961568	32991.4	32991.4	130528	0.797918	26324.4	0.902695	-10.9645	High confidence
Baricitinib	4 cell line mix	Kinobeads	PRKCD	1	1.02473	0.914472	1.14129	1.20647	0.646432	0.722852	0.540155	0.292389	52621000	Normalized LFQ intensity	0.921855	0.27771	1.04626	1135.12	1135.12	1452.91	0.947106	1075.08	0.806683	-0.861813	High confidence
Baricitinib	4 cell line mix	Kinobeads	Q6ZSR9	1	1.18319	0.729231	0.782115	0.634301	0.136871	0.0659464	0	0	125980000	Normalized LFQ intensity	0.997746	-0.0324255	1.02793	103.084	103.084	57.5167	0.761466	78.4951	0.937841	-3.54361	High confidence
Baricitinib	4 cell line mix	Kinobeads	RET	1	1.37701	0.860658	0.996653	1.44975	1.011	0.780093	0.518502	0.0742815	99948000	Normalized LFQ intensity	1.27996	0.0461035	1.12773	2209.17	2209.17	1933.75	0.440569	973.294	0.794276	5.57873	High confidence
Baricitinib	4 cell line mix	Kinobeads	ROCK1	1	1.10621	0.928491	0.843531	0.954352	0.621447	0.374283	0.190494	0.0554288	810940000	Normalized LFQ intensity	0.99407	0.0390758	1.00645	530.377	530.377	203.937	0.909344	482.295	0.967098	-12.5308	High confidence
Baricitinib	4 cell line mix	Kinobeads	ROCK2	1	1.08543	1.05753	0.975674	1.15054	0.75813	0.571574	0.318486	0.132111	735080000	Normalized LFQ intensity	1.17711	0.129171	1.05764	866.934	866.934	336.453	0.871861	755.846	0.959512	-11.4924	High confidence
Baricitinib	4 cell line mix	Kinobeads	SEPT9	1	0.628341	0.975408	0.856964	0.365108	0.436219	0.108301	0.134757	0.192697	7128300	Normalized Intensity	1.64979	0.177522	0.886856	84.1132	84.1132	93.5894	1.42895	84.1132	0.851212	-0.22492	Low confidence
Baricitinib	4 cell line mix	Kinobeads	TNK1	1	0.961658	0.95263	0.979054	0.948229	1.49091	0.993692	0	0	13489000	Normalized LFQ intensity	7.74299	-0.00174499	1.05518	1437.49	1437.49	4898.24	0.432597	621.852	0.881537	3.50185	Low confidence
Baricitinib	4 cell line mix	Kinobeads	ULK1	1	1.2365	0.955879	1.45253	1.64631	1.02935	0.896697	0	0	7731100	Normalized LFQ intensity	5.27331	-0.00173497	1.22032	1212.72	1212.72	NA	0.668058	810.166	0.851219	8.2862	High confidence
BGT-226	4 cell line mix	Kinobeads	CAPZA1	1	0.833184	1.01853	1.37466	0.756526	1.10656	0.737147	0.763664	0.355558	8013600	Normalized Intensity	0.824257	0.196606	1.02126	5559.07	5559.07	21634.2	0.979697	5446.2	0.596093	4.79788	Low confidence
BGT-226	4 cell line mix	Kinobeads	CLK1	1	0.970923	0.996984	1.07824	0.800415	0.608342	0	0	0	4277600	Normalized LFQ intensity	2.06074	-0.0301933	0.992147	344.236	344.236	58.4208	0.715477	246.293	0.982009	-14.0998	High confidence
BGT-226	4 cell line mix	Kinobeads	CSNK2A1;CSNK2A3	1	1.73921	1.86828	2.09619	1.75403	1.60478	1.43379	1.33222	0.42361	46017000	Normalized LFQ intensity	1.10861	0.155789	1.67768	7666.75	7666.75	20615	1.01946	7666.75	0.660248	13.5323	High confidence
BGT-226	4 cell line mix	Kinobeads	CSNK2A2	1	1.48102	1.4413	1.46409	1.17732	1.22983	1.11639	0.925258	0.17026	79873000	Normalized LFQ intensity	0.899015	-0.204775	1.31851	8815.41	8815.41	18556.6	0.962701	8486.61	0.861888	1.44056	High confidence
BGT-226	4 cell line mix	Kinobeads	CSNK2B	1	2.37253	2.32309	2.26654	2.22014	2.53673	1.81834	1.64601	0.531718	34725000	Normalized LFQ intensity	1.61356	0.438868	2.09858	5237.09	5237.09	10490.9	1.08129	5237.09	0.573356	21.0568	High confidence
BGT-226	4 cell line mix	Kinobeads	DCAF7	1	1.27677	1.66156	1.44092	1.23822	1.01585	0.690233	0.65042	0	2276000	Normalized LFQ intensity	0.872283	-0.0016405	1.34047	1608.65	1608.65	1822.92	0.89643	1442.05	0.845812	6.09073	High confidence
BGT-226	4 cell line mix	Kinobeads	DYRK1A	1	1.2907	1.09983	1.58957	1.30922	1.05995	0.654848	0	0	1908400	Normalized LFQ intensity	2.32045	-0.0032087	1.24205	987.793	987.793	349.329	0.933007	921.618	0.91042	3.46398	High confidence
BGT-226	4 cell line mix	Kinobeads	FECH	1	2.5012	2.60099	2.16988	2.5415	2.1956	1.84348	1.22995	0.231755	35104000	Normalized LFQ intensity	1.65034	0.188915	2.16831	3123.57	3123.57	2952.04	0.994935	3107.75	0.663712	22.1235	High confidence
BGT-226	4 cell line mix	Kinobeads	GLO1	1	0.170462	0	0.10944	0	0	0	0	0	5924500	Normalized Intensity	0.810075	-0.00126667	1.00009	0.378746	0.378746	0.468947	1.27125	0.378746	0.986852	-23.5993	Low confidence
BGT-226	4 cell line mix	Kinobeads	GSK3A	1	1.64458	1.73462	1.593	1.55961	1.4606	1.34439	1.1923	0.475581	207830000	Normalized LFQ intensity	1.17676	0.299684	1.50157	6802.14	6802.14	15851.8	0.500216	3402.54	0.728255	7.10302	High confidence
BGT-226	4 cell line mix	Kinobeads	LAGE3	1	1.55147	1.79373	1.02433	1.24228	1.37553	0.674505	0.654017	0	5517500	Normalized LFQ intensity	0.992559	-0.00175429	1.36161	1855.61	1855.61	2385.18	0.950393	1763.56	0.756315	11.731	High confidence
BGT-226	4 cell line mix	Kinobeads	MELK	1	1.59425	1.68088	1.93634	1.58501	1.74195	1.35466	1.10799	0	3076900	Normalized LFQ intensity	1.75697	-0.002186	1.57669	4617.36	4617.36	3719.17	0.883754	4080.61	0.807537	10.9367	High confidence
BGT-226	4 cell line mix	Kinobeads	MYLK3	1	1.33322	1.67702	1.58161	1.34995	1.70145	1.19133	0	0	1360900	Normalized LFQ intensity	6.54896	-0.00182804	1.44055	1270.2	1270.2	1429.61	0.870308	1105.46	0.897233	7.50123	High confidence
BGT-226	4 cell line mix	Kinobeads	OSGEP	1	1.62511	2.36943	2.25806	1.48189	1.1463	0.648627	0.610691	0	19101000	Normalized LFQ intensity	1.01196	-0.00231942	1.784	757.518	757.518	1362.36	0.959803	727.068	0.710844	19.8301	High confidence
BGT-226	4 cell line mix	Kinobeads	PIP4K2C	1	1.87148	2.13518	1.70289	2.08626	1.6246	1.59717	1.33544	0	2133500	Normalized LFQ intensity	2.04643	-0.00255805	1.72793	5285.42	5285.42	7110.23	0.907123	4794.53	0.751547	15.4323	High confidence
BGT-226	4 cell line mix	Kinobeads	SNAP29	1	0.488755	0	0	0	0	0	0	0	2974500	Normalized LFQ intensity	6.90032	-3.65539e-05	1.00008	2.98038	2.98038	NA	1.10677	2.98038	1	-133.4	Low confidence
BGT-226	4 cell line mix	Kinobeads	TP53RK	1	1.67564	1.90686	1.81567	1.42481	1.36395	0.699859	0.419318	0	14459000	Normalized LFQ intensity	1.25305	-0.00188844	1.59009	1008.88	1008.88	797.661	1.04605	1008.88	0.842902	11.3557	High confidence
BGT-226	4 cell line mix	Kinobeads	TPRKB	1	1.54139	1.94858	2.37731	1.73907	1.37442	0.702767	0	0	4723800	Normalized LFQ intensity	1.94116	-0.00349462	1.71483	761.618	761.618	508.436	0.946797	721.098	0.807459	17.3487	High confidence
BI-2536	4 cell line mix	Kinobeads	ADK	1	1.15237	1.13204	NA	0.972724	0.977257	0.911424	0.676888	0.623572	845750	Normalized LFQ intensity	1.01564	0.59105	1.07972	1162.8	1162.8	782.009	1.12458	1162.8	0.899949	-12.8048	Low confidence
BI-2536	4 cell line mix	Kinobeads	CAMKK2	1	0.869829	1.04743	NA	0.72191	0.583699	0.360424	0.182568	0.0867113	20223000	Normalized LFQ intensity	0.848572	0.0601897	0.982747	387.615	387.615	159.212	0.664348	257.511	0.975618	-13.7169	High confidence
BI-2536	4 cell line mix	Kinobeads	CSNK1E	1	0.970705	0.996835	NA	1.18003	0.760385	0.715416	0.784066	0.390328	7494900	Normalized LFQ intensity	0.57028	0.102329	1.02136	8435.03	8435.03	45122.3	0.85489	7211.02	0.777518	-2.70433	High confidence
BI-2536	4 cell line mix	Kinobeads	EIF3M	1	1.2108	0.793199	NA	0	0	0	0	0	2073600	Normalized LFQ intensity	6.81056	-0.00104238	1.10543	11.4697	11.4697	3.74559	1.28558	11.4697	0.98869	-13.9787	Low confidence
BI-2536	4 cell line mix	Kinobeads	FECH	1	1.10929	1.14321	NA	1.33076	1.02188	1.06206	0.837013	0.430285	38366000	Normalized LFQ intensity	1.59568	0.405723	1.12644	3820.38	3820.38	2878.4	0.994935	3801.03	0.863402	-5.05765	High confidence
BI-2536	4 cell line mix	Kinobeads	GAK	1	0.910208	0.949716	NA	1.07377	1.00259	0.783349	0.809568	0.415006	178650000	Normalized LFQ intensity	0.883729	0.23028	0.984642	8576.58	8576.58	19918.6	0.56156	4816.26	0.891935	-10.9109	High confidence
BI-2536	4 cell line mix	Kinobeads	PDXK	1	1.17757	1.10287	NA	0.884639	0.598962	0.442325	0.211066	0.095269	152210000	Normalized LFQ intensity	0.910453	0.0849952	1.10553	387.401	387.401	145.856	1.42751	387.401	0.978562	-12.8518	High confidence
BI-2536	4 cell line mix	Kinobeads	PHKG2	1	1.35602	1.09866	NA	1.28135	1.09182	0.972474	0.849821	0.605885	2763100	Normalized LFQ intensity	1.12173	0.582382	1.17884	2162.76	2162.76	2498.78	0.969809	2097.47	0.78051	-3.10771	High confidence
BI-2536	4 cell line mix	Kinobeads	PIP4K2C	1	1.35549	1.54893	NA	1.48089	0.95063	0.633384	0.759102	0	1289200	Normalized LFQ intensity	0.756958	-0.158685	1.33169	2689.97	2689.97	5475.68	0.907123	2440.14	0.810455	8.05783	High confidence
BI-2536	4 cell line mix	Kinobeads	PRKD2	1	0.960433	1.07539	NA	1.1917	1.15859	0.918712	0.650409	0.231527	44175000	Normalized LFQ intensity	1.74396	0.219124	1.07413	2941.72	2941.72	1022.57	0.659146	1939.03	0.936599	-8.38835	High confidence
BI-2536	4 cell line mix	Kinobeads	PTK2	1	1.04977	1.06625	NA	1.07223	0.90843	0.695733	0.552882	0.362926	295720000	Normalized LFQ intensity	1.16366	0.361566	1.0525	1072.18	1072.18	295.668	0.408006	437.456	0.982817	-21.4291	High confidence
BI-847325	4 cell line mix	Kinobeads	ABL1	1	1.08911	1.19834	1.19455	1.10642	0.940483	0.967406	0.683076	0.37412	33748000	Normalized LFQ intensity	1.01766	0.303023	1.11343	2905.69	2905.69	2033.4	0.547922	1592.09	0.924652	-11.5609	High confidence
BI-847325	4 cell line mix	Kinobeads	ABL2	1	1.09059	1.29233	1.16202	1.03731	0.959834	1.06631	0.837353	0.547849	68709000	Normalized LFQ intensity	0.950513	0.46122	1.11287	4467.06	4467.06	6631.77	0.331378	1480.28	0.803383	-7.12634	High confidence
BI-847325	4 cell line mix	Kinobeads	AURKA	1	0.973763	1.01268	0.85687	0.604948	0.358367	0.156336	0	0	38257000	Normalized LFQ intensity	1.01249	-0.0167257	1.01495	166.525	166.525	23.2298	0.353704	58.9007	0.995543	-28.3794	High confidence
BI-847325	4 cell line mix	Kinobeads	AURKB	1	0.781359	0.748159	0.861081	0.448803	0	0	0	0	5522300	Normalized LFQ intensity	7.8427	-0.000347052	0.847664	101.526	101.526	16.8825	0.585272	59.4202	0.974455	-12.7542	High confidence
BI-847325	4 cell line mix	Kinobeads	AZI2	1	1.15867	1.04936	0.832167	1.0791	0.626402	0.498757	0.410903	0.040547	13160000	Normalized LFQ intensity	0.64454	-0.0661748	1.07609	1188	1188	1465.14	0.701841	833.788	0.913438	-4.16553	High confidence
BI-847325	4 cell line mix	Kinobeads	BTK	1	1.11766	1.17941	1.29117	1.15895	0.930082	0.763304	0.478003	0.170438	383340000	Normalized LFQ intensity	1.09551	0.140734	1.15115	1504.7	1504.7	686.784	0.390881	588.16	0.946994	-8.94627	High confidence
BI-847325	4 cell line mix	Kinobeads	CDC7	1	1.0705	0.653979	0.823567	0.7965	0.892652	0.735492	0.554397	0	141130	Normalized Intensity	1.40168	-0.0279988	0.873508	4334.52	4334.52	3606.03	0.92117	3992.83	0.85638	-2.74617	High confidence
BI-847325	4 cell line mix	Kinobeads	CDK16	1	1.05337	1.12107	1.17039	0.914948	0.956279	0.686333	0	0	3240400	Normalized LFQ intensity	4.42825	-0.0023318	1.0367	1162.52	1162.52	418.074	0.942646	1095.84	0.971369	-10.6381	High confidence
BI-847325	4 cell line mix	Kinobeads	CDK3	1	0.85022	0.745407	0.868868	0.89978	0.720742	0.427278	0.251125	0.0748301	2177200	Normalized Intensity	1.29774	0.0812186	0.881405	896.517	896.517	347.879	2.154	896.517	0.953206	-12.521	High confidence
BI-847325	4 cell line mix	Kinobeads	CDK6	1	1.05013	0.77393	1.23973	1.37616	1.21314	0.757933	0.691282	0	3791200	Normalized LFQ intensity	1.37244	-0.00136103	1.09621	3620.7	3620.7	3083.73	0.819855	2968.45	0.792918	5.36331	High confidence
BI-847325	4 cell line mix	Kinobeads	CDKL5	1	1.18837	0.694457	0.459176	0.566471	0.231184	0.229656	0	0.286711	365350	Normalized Intensity	0.942012	0.182698	1.09437	22.6055	22.6055	21.6598	0.889376	20.1048	0.85871	0.824437	High confidence
BI-847325	4 cell line mix	Kinobeads	DDR1	1	1.08566	1.54069	1.45668	1.28988	1.00986	0.720814	0.308186	0.314846	4444200	Normalized LFQ intensity	1.631	0.27957	1.2728	746.982	746.982	461.58	0.627266	468.556	0.853715	3.73862	High confidence
BI-847325	4 cell line mix	Kinobeads	DDR2	1	0.912561	0.739584	0.987114	0.944959	0.780634	0.560207	0.317427	0.0388305	20372000	Normalized LFQ intensity	1.14277	0.0148556	0.92239	1525.69	1525.69	684.135	0.762065	1162.67	0.945182	-10.4436	High confidence
BI-847325	4 cell line mix	Kinobeads	FECH	1	1.28732	1.2548	1.30676	1.42127	1.26551	1.22966	0.953509	0.46511	10192000	Normalized LFQ intensity	3.13644	0.464148	1.25452	3498.28	3498.28	2462.31	0.994935	3480.56	0.856823	-4.28101	High confidence
BI-847325	4 cell line mix	Kinobeads	FER	1	1.1672	1.12096	1.20634	1.06972	0.880141	0.638972	0.406713	0.202251	72602000	Normalized LFQ intensity	1.11524	0.193709	1.12756	910.976	910.976	304.844	0.422267	384.675	0.971099	-14.8498	High confidence
BI-847325	4 cell line mix	Kinobeads	FGFR1	1	1.03497	1.18704	1.02398	1.34653	1.08878	1.15408	0.747681	0	1571300	Normalized LFQ intensity	5.47783	-0.00131214	1.11952	3409.54	3409.54	1419.77	0.736349	2510.61	0.927899	-5.03132	High confidence
BI-847325	4 cell line mix	Kinobeads	FLT3	1	1.0168	1.06373	1.23926	0.795358	0.540351	0	0	0	1870200	Normalized LFQ intensity	1.7627	-0.0301997	1.06691	274.588	274.588	71.5616	0.537356	147.551	0.967237	-7.45797	High confidence
BI-847325	4 cell line mix	Kinobeads	FRK	1	1.13311	1.27591	1.36793	1.14001	1.02689	0.903842	0.705894	0.375601	58567000	Normalized LFQ intensity	0.98782	0.322207	1.18588	2165.73	2165.73	1804.83	0.339663	735.617	0.881368	-5.20931	High confidence
BI-847325	4 cell line mix	Kinobeads	FYN	1	1.02603	1.21992	1.13215	0.914466	0.698424	0.592247	0.460227	0.278065	40309000	Normalized LFQ intensity	0.94304	0.303779	1.10231	434.286	434.286	299.462	0.431007	187.18	0.934872	-9.50171	High confidence
BI-847325	4 cell line mix	Kinobeads	HCK	1	1.1422	1.30206	1.28824	1.04242	0.860955	0.796141	0.557853	0.211492	128200000	Normalized LFQ intensity	0.796159	0.123722	1.17497	1735.62	1735.62	1600.18	0.518348	899.657	0.910752	-4.96268	High confidence
BI-847325	4 cell line mix	Kinobeads	IKBKE	1	0.982226	1.1498	1.18742	1.03465	0.577855	0.561292	0	0	3640800	Normalized LFQ intensity	1.14461	-0.0482753	1.08531	657.658	657.658	352.894	0.620827	408.292	0.928092	-1.99821	High confidence
BI-847325	4 cell line mix	Kinobeads	INCENP	1	1.0943	0.845818	0.662941	0.558229	0	0	0	0	753760	Normalized LFQ intensity	1.1178	-0.0394303	1.02155	73.2185	73.2185	30.934	0.892521	65.349	0.960364	-7.31533	High confidence
BI-847325	4 cell line mix	Kinobeads	LATS1	1	1.01544	1.07909	1.15576	0.941228	0.713187	0.551028	0	0	5848800	Normalized LFQ intensity	1.24884	-0.0586756	1.05198	805.837	805.837	277.742	0.787536	634.626	0.96103	-8.2294	High confidence
BI-847325	4 cell line mix	Kinobeads	LCK	1	1.12572	1.31079	1.21237	0.925608	0.578606	0.382332	0.241211	0.11012	214140000	Normalized LFQ intensity	1.3369	0.173196	1.16971	260.057	260.057	113.331	0.440511	114.558	0.952433	-6.46473	High confidence
BI-847325	4 cell line mix	Kinobeads	LYN	1	1.05957	1.15576	1.11843	0.742258	0.45732	0.26254	0.149653	0.0545541	194650000	Normalized LFQ intensity	1.32609	0.107423	1.09638	192.935	192.935	55.6354	0.501873	96.829	0.976636	-13.0339	High confidence
BI-847325	4 cell line mix	Kinobeads	MAP2K1	1	0.9927	0.936685	1.05707	0.911448	0.451351	0	0	0	9265900	Normalized LFQ intensity	2.64267	-0.0101892	0.993299	279.393	279.393	19.7257	1.23132	279.393	0.995207	-25.8477	High confidence
BI-847325	4 cell line mix	Kinobeads	MAP2K2	1	1.14381	1.1172	1.27833	0.881069	0.298364	0.118731	0	0	13698000	Normalized LFQ intensity	2.26796	0.0301873	1.13453	181.093	181.093	35.933	1.17379	181.093	0.977356	-9.90671	High confidence
BI-847325	4 cell line mix	Kinobeads	MAP2K5	1	0.873175	0.91902	0.867899	0.584231	0.432197	0.138556	0.10077	0	11472000	Normalized LFQ intensity	0.928562	-0.000974832	0.96218	201.694	201.694	48.9295	0.875759	176.635	0.987977	-21.1533	High confidence
BI-847325	4 cell line mix	Kinobeads	MAP4K1	1	1.21588	1.47582	1.93958	2.06487	1.30705	0.591771	0.607673	0	539550	Normalized Intensity	1.35419	-0.00196833	1.52634	1205.18	1205.18	2048.79	0.726208	875.209	0.705398	17.1399	High confidence
BI-847325	4 cell line mix	Kinobeads	MAP4K5	1	1.02306	1.06487	1.30545	1.08918	0.955167	0.742983	0.421446	0.0616064	35689000	Normalized LFQ intensity	1.20493	0.031336	1.09812	1824.06	1824.06	756.582	0.744124	1357.33	0.946093	-7.95951	High confidence
BI-847325	4 cell line mix	Kinobeads	MAPKAPK5	1	1.00259	0.942066	1.26793	1.40151	0.789974	0.654256	0.453634	0.138571	1044300	Normalized Intensity	1.22802	0.152502	1.10293	1198.77	1198.77	1122.21	0.929367	1114.09	0.816725	3.40433	Low confidence
BI-847325	4 cell line mix	Kinobeads	MDH1	1	0.643685	0	0	0	0	0	0	0	2424300	Normalized LFQ intensity	4.47027	-0.00524433	0.999941	3.42994	3.42994	0.0516105	1.38588	3.42994	0.999844	-61.1554	Low confidence
BI-847325	4 cell line mix	Kinobeads	MDN1	1	1.05555	0.949728	1.09708	0.887027	1.08821	0.908265	0	0	38435000	Normalized LFQ intensity	7.90171	-0.00138369	1.01293	1314.75	1314.75	2406.59	1.27125	1314.75	0.978296	-13.5284	Low confidence
BI-847325	4 cell line mix	Kinobeads	MELK	1	1.01313	1.02021	1.17256	1.01714	0.824275	0.603065	0	0	1588600	Normalized LFQ intensity	2.05105	-0.00420944	1.02799	1038.28	1038.28	269.386	0.883754	917.586	0.966347	-9.51104	High confidence
BI-847325	4 cell line mix	Kinobeads	PDGFRB	1	0.981755	0.685945	0.815585	0.828769	0.733422	0.663423	0	0	2925900	Normalized LFQ intensity	5.56939	-0.00171933	0.841031	1266.36	1266.36	1250.29	0.873974	1106.77	0.928729	-5.81527	High confidence
BI-847325	4 cell line mix	Kinobeads	PDPK1;PDPK2P	1	1.31516	1.36532	1.43664	1.04144	1.10949	1.26776	0.773464	0	1912100	Normalized LFQ intensity	6.12145	-0.00140168	1.2195	3283.53	3283.53	1328.9	1.04203	3283.53	0.889021	0.907867	High confidence
BI-847325	4 cell line mix	Kinobeads	PLK4	1	1.26517	1.56156	1.25133	1.20946	0.723086	0.701001	0	0	939750	Normalized LFQ intensity	1.18739	-0.00187797	1.27406	653.414	653.414	451.573	0.509269	332.764	0.885455	5.40474	High confidence
BI-847325	4 cell line mix	Kinobeads	PRKAA1	1	1.10297	1.30116	1.13656	1.04133	0.981575	1.04631	0.84029	0.541415	152180000	Normalized LFQ intensity	0.886615	0.433937	1.1177	4782.59	4782.59	7068.22	0.637811	3050.39	0.823564	-8.05759	High confidence
BI-847325	4 cell line mix	Kinobeads	PRKAG2	1	0.917632	0.781874	1.0268	1.68168	1.20675	0.981718	0.751097	0	1283300	Normalized LFQ intensity	2.06591	0.00290827	1.09479	4263.87	4263.87	4264.92	0.644818	2749.42	0.679352	10.6179	High confidence
BI-847325	4 cell line mix	Kinobeads	RET	1	1.02643	1.42072	1.60305	1.04136	0.762911	0.484647	0.177533	0.0381851	32394000	Normalized LFQ intensity	1.26776	0.0569252	1.24557	514.25	514.25	408.26	0.440569	226.563	0.861161	6.21771	High confidence
BI-847325	4 cell line mix	Kinobeads	RNPEP	1	1.27773	1.1139	0.443172	0	0.329822	0	0.232718	0.0785295	1239700	Normalized Intensity	6.00904	0.12841	1.13151	26.3275	26.3275	22.9914	1.20183	26.3275	0.937461	-1.89931	Low confidence
BI-847325	4 cell line mix	Kinobeads	RPS6KA1	1	1.06294	1.16533	1.18613	0.942156	0.860107	0.679658	0.411077	0.209219	188080000	Normalized LFQ intensity	0.959987	0.173107	1.09637	1062.34	1062.34	466.947	0.751989	798.865	0.959826	-12.9375	High confidence
BI-847325	4 cell line mix	Kinobeads	RPS6KA3	1	1.08819	1.25962	1.14192	1.02619	0.85109	0.718584	0.484059	0.275583	84601000	Normalized LFQ intensity	0.927241	0.245599	1.12499	1012.61	1012.61	551.898	0.724844	733.983	0.946275	-11.13	High confidence
BI-847325	4 cell line mix	Kinobeads	RPS6KA4	1	1.05371	1.04742	1.16681	1.09667	1.02719	0.832754	0.686546	0.37774	33769000	Normalized LFQ intensity	1.13647	0.344792	1.07636	2363.57	2363.57	979.383	0.617388	1459.24	0.958851	-18.1964	High confidence
BI-847325	4 cell line mix	Kinobeads	SIK2	1	0.880388	1.00367	0.921308	0.955583	0.822418	0.806951	0.627166	0.304109	12056000	Normalized LFQ intensity	0.691698	0.0675056	0.963104	6778.24	6778.24	11898.4	0.518256	3512.86	0.96161	-20.7993	High confidence
BI-847325	4 cell line mix	Kinobeads	SLK	1	1.03659	1.15923	1.08987	0.967223	0.757446	0.646856	0.417777	0.064674	68412000	Normalized LFQ intensity	0.74797	-0.0436024	1.08218	1676.89	1676.89	928.408	0.890695	1493.6	0.971992	-14.9977	High confidence
BI-847325	4 cell line mix	Kinobeads	SRC	1	1.04226	1.21146	1.2262	1.08487	0.90263	0.789767	0.568723	0.351702	182630000	Normalized LFQ intensity	1.02872	0.328977	1.11874	1265.57	1265.57	734.917	0.388259	491.37	0.926873	-10.1316	High confidence
BI-847325	4 cell line mix	Kinobeads	STK10	1	0.889295	1.07446	0.992258	0.682212	0.23319	0.119824	0.0329401	0.00474305	37346000	Normalized LFQ intensity	1.95088	0.0425365	0.998142	148.034	148.034	24.9768	0.915468	135.52	0.985313	-16.7002	High confidence
BI-847325	4 cell line mix	Kinobeads	STK3	1	1.03753	1.17485	1.35666	1.05276	1.00354	0.981294	0.820135	0.288446	20603000	Normalized LFQ intensity	0.971125	0.105646	1.11947	6604.97	6604.97	9596.14	0.764244	5047.81	0.86903	-4.8568	High confidence
BI-847325	4 cell line mix	Kinobeads	STK4	1	1.29102	1.44079	1.52493	1.40125	1.23044	0.740147	0.698361	0.17991	15009000	Normalized LFQ intensity	1.10157	0.170182	1.33854	1658.69	1658.69	1525.43	0.762521	1264.78	0.85307	3.5582	High confidence
BI-847325	4 cell line mix	Kinobeads	TANK	1	1.01441	0.988934	0.999366	1.20506	0.944787	0.548418	0.378774	0.069898	21935000	Normalized LFQ intensity	1.40772	0.0939266	1.04463	1202.28	1202.28	501.425	0.63618	764.866	0.948713	-8.96133	High confidence
BI-847325	4 cell line mix	Kinobeads	TBK1	1	0.981249	1.04926	1.15812	0.91666	0.759208	0.608966	0.369402	0.102418	166640000	Normalized LFQ intensity	0.87004	0.0529049	1.04719	1186.93	1186.93	555.703	0.639531	759.076	0.966033	-13.8728	High confidence
BI-847325	4 cell line mix	Kinobeads	TBKBP1	1	1.04193	1.33202	1.11091	0.780242	0.448967	0.55989	0	0	1468400	Normalized LFQ intensity	0.891047	-0.0226248	1.1401	355.948	355.948	321.502	0.793595	282.478	0.891672	2.25717	High confidence
BI-847325	4 cell line mix	Kinobeads	TEC	1	1.1312	1.14815	1.31661	1.07131	0.99188	0.926211	0.596908	0.294203	31695000	Normalized LFQ intensity	1.17523	0.252379	1.13272	2199.11	2199.11	1138.32	0.402382	884.884	0.921172	-8.34654	High confidence
BI-847325	4 cell line mix	Kinobeads	TNK2	1	1.17952	1.2344	1.06281	1.0861	1.07747	1.1026	0.850198	0.444406	6958000	Normalized LFQ intensity	3.37157	0.443737	1.10751	3442.06	3442.06	1260.14	0.450162	1549.49	0.91879	-13.1109	High confidence
BI-847325	4 cell line mix	Kinobeads	ULK3	1	1.21295	1.23449	1.25376	1.10431	0.809237	0.615127	0.452345	0.0182842	36953000	Normalized LFQ intensity	0.824713	-0.0416413	1.18597	1348.85	1348.85	901.917	0.453962	612.326	0.947956	-6.59098	High confidence
BI-847325	4 cell line mix	Kinobeads	UNC119	1	0.60849	0.846916	0.410948	0.641278	0.402234	0	0	0	517560	Normalized Intensity	0.520031	-0.091668	0.921783	122.161	122.161	186.543	0.72583	88.6683	0.843903	1.14342	High confidence
BI-847325	4 cell line mix	Kinobeads	YES1	1	1.19455	1.59352	1.21313	0.856206	0.546793	0.339872	0.165845	0	9822200	Normalized LFQ intensity	1.19234	0.0785256	1.26581	226.787	226.787	161.491	0.41317	93.7016	0.901595	3.41071	High confidence
Binimetinib	4 cell line mix	Kinobeads	MAP2K1	1	0.996303	0.822554	0.661434	0.331015	0	0	0.218199	0	82759000	Normalized LFQ intensity	1.38679	0.0458968	0.987808	45.2357	45.2357	15.713	1.23132	45.2357	0.963113	-9.54238	High confidence
Binimetinib	4 cell line mix	Kinobeads	MAP2K2	1	0.799943	0.940159	0.49547	0.281175	0	0	0	0.193745	119140000	Normalized LFQ intensity	1.58444	0.0522343	0.940699	36.1968	36.1968	13.3267	1.17379	36.1968	0.946119	-6.79493	High confidence
Binimetinib	4 cell line mix	Kinobeads	NQO2	1	0.942546	0.898918	0.731242	0.842343	0.74048	0.682674	0.526501	0.228352	1047400000	Normalized LFQ intensity	0.378109	-0.305463	0.972848	14699.6	14699.6	24083.8	1.06667	14699.6	0.951109	-17.5068	High confidence
BMS-387032	4 cell line mix	Kinobeads	AFF1	1	0.744319	0.431464	0.221192	0.0619109	0.0400612	0	0	0.0283332	1421300	Normalized Intensity	1.05153	0.00891866	1.00139	7.90995	7.90995	0.496936	0.926593	7.3293	0.998703	-42.339	High confidence
BMS-387032	4 cell line mix	Kinobeads	AFF4	1	0.785831	0.942369	0.404882	0	0.363332	0	0	0	4167900	Normalized LFQ intensity	10.1634	0.0731294	0.909407	28.7877	28.7877	18.6327	1.00904	28.7877	0.909801	-1.59786	High confidence
BMS-387032	4 cell line mix	Kinobeads	C2CD5	1	1.14172	1.28766	1.18936	1.24387	1.10694	1.0156	0.788469	0.315036	95754000	Normalized LFQ intensity	1.24536	0.248819	1.1688	3892.82	3892.82	2535.41	0.545264	2122.61	0.92815	-9.86707	High confidence
BMS-387032	4 cell line mix	Kinobeads	CABLES1	1	1.33799	1.52621	1.63826	1.84622	1.41985	1.21676	1.0848	0.268236	6802400	Normalized LFQ intensity	1.28644	0.143013	1.45652	5459.8	5459.8	8053.52	0.549533	3000.34	0.741639	9.20293	High confidence
BMS-387032	4 cell line mix	Kinobeads	CCNA2	1	1.18253	1.39762	1.17391	1.09685	0.988783	0.681363	0.611206	0.257927	20792000	Normalized LFQ intensity	0.89088	0.229009	1.19544	1244.23	1244.23	1066.56	0.86194	1072.46	0.901617	-4.17925	High confidence
BMS-387032	4 cell line mix	Kinobeads	CCNB1	1	1.04802	1.14646	0.93904	1.06705	0.95519	0.73488	0.545337	0.267229	38084000	Normalized LFQ intensity	1.08703	0.236262	1.0488	1755.18	1755.18	721.065	0.766242	1344.89	0.959833	-15.9052	High confidence
BMS-387032	4 cell line mix	Kinobeads	CCNB2	1	0.887462	1.17254	1.01285	0.970538	0.845692	0.667069	0.481808	0	14499000	Normalized LFQ intensity	0.875084	-0.0873666	1.0206	2683.17	2683.17	1613.2	0.701269	1881.63	0.953056	-10.6086	High confidence
BMS-387032	4 cell line mix	Kinobeads	CCNE1	1	0.972247	1.0279	1.306	0.483142	0.306421	0.412424	0	0	2767300	Normalized Intensity	9.94836	0.179524	1.07654	93.487	93.487	83.1106	0.728854	68.1383	0.887361	2.55753	High confidence
BMS-387032	4 cell line mix	Kinobeads	CCNH	1	1.10344	1.0337	1.11487	1.14079	0.858919	0.620341	0.283313	0	45213000	Normalized LFQ intensity	1.24325	-0.00113931	1.07955	1251.67	1251.67	305.125	0.758128	948.93	0.980081	-15.8288	High confidence
BMS-387032	4 cell line mix	Kinobeads	CCNK	1	1.03215	1.46015	1.23946	0.938991	0.576657	0.267678	0.0967978	0	27548000	Normalized LFQ intensity	1.4009	0.0394338	1.18589	294.818	294.818	147.214	1.1145	294.818	0.928511	-0.0132846	High confidence
BMS-387032	4 cell line mix	Kinobeads	CCNT1	1	0.694342	0.591875	0.0927677	0.0510968	0.0019125	0.00209578	0	0.0173676	56553000	Normalized LFQ intensity	1.24404	-0.00654068	0.964223	9.91467	9.91467	3.12512	0.983173	9.74784	0.972054	-13.9848	High confidence
BMS-387032	4 cell line mix	Kinobeads	CCNT2	1	1.03022	0.880862	0.445984	0.226917	0	0	0	0	5601300	Normalized LFQ intensity	1.40788	-0.0010293	1.03972	28.7237	28.7237	4.29298	0.880012	25.2772	0.991622	-21.7231	High confidence
BMS-387032	4 cell line mix	Kinobeads	CDK1	1	0.983122	1.22475	1.05742	1.11838	0.956015	0.72475	0.500709	0.165683	258480000	Normalized LFQ intensity	1.1207	0.13458	1.0813	1789.62	1789.62	788.93	0.685984	1227.65	0.950697	-11.163	High confidence
BMS-387032	4 cell line mix	Kinobeads	CDK12	1	1.09786	1.34848	0.997793	0.884414	0.589159	0.312103	0.195579	0.525566	199570000	Normalized LFQ intensity	1.71877	0.34041	1.12331	166.593	166.593	90.8652	1.11983	166.593	0.883205	-0.993	High confidence
BMS-387032	4 cell line mix	Kinobeads	CDK13	1	0.924043	1.0138	0.979444	0.689917	0.644006	0	0	0	7987700	Normalized LFQ intensity	1.67791	-0.0436241	0.959646	356.143	356.143	108.609	1.24846	356.143	0.963631	-8.47092	High confidence
BMS-387032	4 cell line mix	Kinobeads	CDK16	1	1.29224	1.34518	0.996603	0.778319	0	0	0	0	8144100	Normalized LFQ intensity	3.7476	-0.00762705	1.1614	120.163	120.163	28.4999	0.942646	113.272	0.96347	-3.6926	High confidence
BMS-387032	4 cell line mix	Kinobeads	CDK17	1	0.401915	0.255936	0	0	0	0	0	0	684000	Normalized Intensity	0.959155	-0.00447597	0.999083	2.18776	2.18776	0.53991	1.02071	2.18776	0.988147	-23.8986	High confidence
BMS-387032	4 cell line mix	Kinobeads	CDK2	1	1.17011	1.19263	1.0836	0.918291	0.615236	0.349199	0.172392	0.0172708	326670000	Normalized LFQ intensity	1.05716	0.0330913	1.13179	385.241	385.241	113.302	0.532482	205.134	0.981288	-14.725	High confidence
BMS-387032	4 cell line mix	Kinobeads	CDK4	1	1.23244	1.46377	1.43017	1.09703	1.44215	0.936522	0.825983	0	2509400	Normalized LFQ intensity	1.36719	-0.0014611	1.26743	3963.63	3963.63	2775.4	1	3963.63	0.852532	4.15641	High confidence
BMS-387032	4 cell line mix	Kinobeads	CDK5	1	0.994259	1.0877	1.08064	1.18082	1.16918	0.936716	0.895317	0.281319	625740000	Normalized LFQ intensity	1.34237	0.158625	1.07753	7604.88	7604.88	8283.11	0.523615	3982.03	0.927939	-11.6466	High confidence
BMS-387032	4 cell line mix	Kinobeads	CDK6	1	1.26809	1.43659	1.01733	0.785249	0.410227	0.185714	0	0	11673000	Normalized LFQ intensity	1.22509	-0.00146718	1.22143	172.673	172.673	76.4074	0.819855	141.567	0.947118	-1.87338	High confidence
BMS-387032	4 cell line mix	Kinobeads	CDK7	1	1.1777	1.17761	1.22647	1.22081	0.977074	0.694281	0.394097	0.0693044	72817000	Normalized LFQ intensity	1.2274	0.0561759	1.1628	1381.83	1381.83	450.994	0.725457	1002.46	0.966589	-11.0375	High confidence
BMS-387032	4 cell line mix	Kinobeads	CDK9	1	0.964639	0.837577	0.602727	0.349882	0.15264	0.0687694	0.0288873	0	130470000	Normalized LFQ intensity	0.960097	0.00806773	1.01359	47.8083	47.8083	2.96947	0.711499	34.0155	0.999141	-43.9864	High confidence
BMS-387032	4 cell line mix	Kinobeads	CKS1B	1	0.827196	1.38128	1.47272	0.959306	0.939761	0.344345	0.314218	0	6408700	Normalized LFQ intensity	1.46458	0.0725362	1.15132	627.601	627.601	516.556	0.69147	433.967	0.823164	7.21358	High confidence
BMS-387032	4 cell line mix	Kinobeads	CLK1	1	1.03323	1.46323	1.40079	1.42013	1.41092	1.17824	0.755017	0.382674	8559200	Normalized LFQ intensity	2.38996	0.381029	1.28578	2573.49	2573.49	1202.26	0.715477	1841.27	0.789608	3.3605	High confidence
BMS-387032	4 cell line mix	Kinobeads	CSNK1D	1	1.17199	1.3625	1.40402	1.24122	1.22316	1.19945	1.06155	0.481717	54563000	Normalized LFQ intensity	2.7968	0.478536	1.23056	4642.32	4642.32	NA	0.822647	3818.99	0.825095	-3.55857	High confidence
BMS-387032	4 cell line mix	Kinobeads	DCAF7	1	1.05349	0.860078	1.15969	1.19436	0.973654	0.819604	0.721659	0.354885	7264600	Normalized LFQ intensity	1.07891	0.29873	1.04737	3225.66	3225.66	3321.4	0.89643	2891.58	0.843309	-5.64451	High confidence
BMS-387032	4 cell line mix	Kinobeads	DYRK1A	1	1.09129	1.22157	1.17662	1.28682	1.21278	1.15013	0.775163	0	9691900	Normalized LFQ intensity	3.33077	-0.00131074	1.1649	3690.09	3690.09	1448.16	0.933007	3442.88	0.958754	-9.66094	High confidence
BMS-387032	4 cell line mix	Kinobeads	ERCC2	1	1.18404	1.27076	1.18104	1.26751	1.00157	0.625286	0.328604	0	59546000	Normalized LFQ intensity	1.29969	-0.0012676	1.18486	1224.92	1224.92	418.794	0.904725	1108.22	0.962057	-8.14243	High confidence
BMS-387032	4 cell line mix	Kinobeads	FAM58A;FAM58BP	1	1.59853	1.3886	1.07558	0.787536	0.450287	0.425881	0	0	283530	Normalized Intensity	0.942861	-0.0015954	1.33323	183.163	183.163	156.127	0.722993	132.425	0.89495	5.13224	High confidence
BMS-387032	4 cell line mix	Kinobeads	FAM83B	1	0.960673	1.28204	0.725705	0.923231	1.02598	0.881346	0.729828	0	5002500	Normalized LFQ intensity	1.86342	-0.00102714	0.980159	5115.78	5115.78	4548.09	1.05785	5115.78	0.834902	0.625923	High confidence
BMS-387032	4 cell line mix	Kinobeads	FIBP	1	1.09266	1.07259	1.10062	1.19096	1.06392	0.95362	0.786093	0.286462	60162000	Normalized LFQ intensity	1.24494	0.204204	1.0896	4866.46	4866.46	2698.47	0.570275	2775.22	0.964815	-17.9881	High confidence
BMS-387032	4 cell line mix	Kinobeads	GSK3A	1	1.18102	1.22463	1.09976	0.978349	0.630874	0.339384	0.172094	0.0220629	326480000	Normalized LFQ intensity	1.16736	0.0472078	1.14378	386.714	386.714	114.718	0.500216	193.441	0.978329	-12.9928	High confidence
BMS-387032	4 cell line mix	Kinobeads	GSK3B	1	1.21267	1.20124	1.0498	1.19902	0.737198	0.467407	0.27308	0.0386349	323230000	Normalized LFQ intensity	1.17744	0.0635744	1.14681	643.827	643.827	293.174	0.464999	299.379	0.95235	-6.6134	High confidence
BMS-387032	4 cell line mix	Kinobeads	GSKIP	1	1.11392	0.903458	0	0	0	0	0	0	4649800	Normalized Intensity	6.9878	-0.00105821	1.05699	12.8888	12.8888	3.73961	0.837391	10.793	0.996821	-28.5685	High confidence
BMS-387032	4 cell line mix	Kinobeads	MAPK7	1	1.84105	1.69665	1.46246	1.73555	1.38205	1.15227	1.29556	0.727766	2722800	Normalized LFQ intensity	0.818194	0.548849	1.5298	5665.38	5665.38	19473	0.778912	4412.83	0.509629	10.9734	High confidence
BMS-387032	4 cell line mix	Kinobeads	MET	1	1.29319	1.58465	1.72137	1.27875	1.16407	1.1304	0.428048	0	810400	Normalized Intensity	1.89804	-0.00169038	1.35303	2069.19	2069.19	963.659	0.803492	1662.58	0.851625	7.29579	High confidence
BMS-387032	4 cell line mix	Kinobeads	MLLT1	1	0.158848	0	0	0	0	0	0	0	1831500	Normalized Intensity	2.56371	-0.00233408	0.998577	1.58197	1.58197	0.0859119	1.29512	1.58197	0.999913	-68.6371	Low confidence
BMS-387032	4 cell line mix	Kinobeads	MNAT1	1	1.29922	1.51062	1.08908	1.56811	1.00511	0.722704	0.361629	0.181456	23316000	Normalized LFQ intensity	1.54909	0.191085	1.28159	933.808	933.808	615.079	0.878192	820.063	0.8446	5.42405	High confidence
BMS-387032	4 cell line mix	Kinobeads	PRKD3	1	1.23181	1.28644	1.20216	1.38211	1.53064	1.24539	1.00347	0.270335	6991900	Normalized LFQ intensity	2.93127	0.267099	1.27049	4240.74	4240.74	3965.31	0.740225	3139.1	0.847462	0.262257	High confidence
BMS-387032	4 cell line mix	Kinobeads	STRADA	1	0.413909	0.902216	0.536451	0.631823	0.317804	0.300125	0.305623	0.0679387	3275600	Normalized Intensity	0.199554	-0.460434	0.984271	2807.07	2807.07	16959.3	1.02005	2807.07	0.747547	1.5976	Low confidence
BMS-690514	4 cell line mix	Kinobeads	AAK1	1	0.976812	0.897436	1.00847	0.976737	0.988034	0.858714	0.508161	0.293326	168410000	Normalized LFQ intensity	2.19287	0.291957	0.975691	2100.08	2100.08	280.872	0.673073	1413.51	0.984214	-26.3742	High confidence
BMS-690514	4 cell line mix	Kinobeads	ABL1	1	0.955902	0.673056	0.786693	0.58061	0.480112	0.36012	0.157919	0.100697	132300000	Normalized LFQ intensity	0.465436	-0.0169564	1.00188	233.234	233.234	215.11	0.547922	127.794	0.958151	-13.4497	High confidence
BMS-690514	4 cell line mix	Kinobeads	ABL2	1	1.03872	0.763573	0.713229	0.597648	0.418201	0.32665	0.138518	0.114698	141680000	Normalized LFQ intensity	0.588604	0.0650704	1.02862	121.237	121.237	66.8544	0.331378	40.1752	0.972518	-16.162	High confidence
BMS-690514	4 cell line mix	Kinobeads	BMP2K	1	1.00838	0.883453	0.979013	0.94808	1.02915	0.891851	0.673113	0.446144	80882000	Normalized LFQ intensity	2.00949	0.443183	0.974053	2590.94	2590.94	612.112	0.660952	1712.49	0.950506	-21.1867	High confidence
BMS-690514	4 cell line mix	Kinobeads	CAMK2D	1	0.881483	0.889443	0.933552	0.978418	1.07274	1.06388	0.78005	0.208587	1252000000	Normalized LFQ intensity	7.77378	0.208502	0.974217	3447.12	3447.12	2266.38	0.203913	702.913	0.935635	-13.1969	High confidence
BMS-690514	4 cell line mix	Kinobeads	CAMK2G	1	0.843304	0.810025	0.821831	0.838646	0.963052	0.929453	0.683833	0.17704	479140000	Normalized LFQ intensity	7.34038	0.17703	0.886629	3398.78	3398.78	2259.68	0.217204	738.229	0.928566	-13.4761	High confidence
BMS-690514	4 cell line mix	Kinobeads	CHEK1	1	0.939955	0.973493	0.944561	1.00994	1.03305	0.876515	0.579045	0.352877	15602000	Normalized LFQ intensity	2.14116	0.351755	0.983238	2264.03	2264.03	323.57	0.824825	1867.43	0.981467	-26.6391	High confidence
BMS-690514	4 cell line mix	Kinobeads	CIT	1	1.03214	0.875859	1.07876	0.930965	0.541544	1.28214	0.402027	0.110927	130300000	Normalized LFQ intensity	8.58577	0.111029	0.963051	2780.41	2780.41	965.75	1.21394	2780.41	0.726859	6.14526	Low confidence
BMS-690514	4 cell line mix	Kinobeads	CSK	1	0.855997	0.900766	1.02132	1.04992	1.2305	0.984648	0.70948	0.343226	1061100000	Normalized LFQ intensity	3.29109	0.342889	1.0083	3189.8	3189.8	963.846	0.538187	1716.71	0.831359	-5.29592	High confidence
BMS-690514	4 cell line mix	Kinobeads	CSNK1A1	1	0.877546	1.13981	1.06588	0.977641	1.20466	0.66057	0.465931	0.180863	58727000	Normalized LFQ intensity	1.74391	0.207289	1.04294	1484.9	1484.9	860.182	0.923531	1371.36	0.888788	-3.70287	High confidence
BMS-690514	4 cell line mix	Kinobeads	CSNK1E	1	1.03055	1.16724	0.952293	0.970205	1.07588	0.978146	0.832995	0.484981	22382000	Normalized LFQ intensity	1.71022	0.465711	1.03236	4259.36	4259.36	3058.49	0.85489	3641.28	0.894483	-14.2403	High confidence
BMS-690514	4 cell line mix	Kinobeads	CSNK2A1;CSNK2A3	1	0.798232	0.877825	0.963011	0.823725	1.11232	0.930415	0.654404	0.321061	109270000	Normalized LFQ intensity	5.57428	0.321057	0.929517	3105.18	3105.18	1105.64	1.01946	3105.18	0.835621	-7.10331	High confidence
BMS-690514	4 cell line mix	Kinobeads	CSNK2A2	1	0.784239	0.927976	0.960007	0.920637	1.20289	0.932703	0.57119	0.190117	195140000	Normalized LFQ intensity	3.26957	0.189851	0.964397	2969.32	2969.32	735.618	0.962701	2858.57	0.863853	-4.51173	High confidence
BMS-690514	4 cell line mix	Kinobeads	CSNK2B	1	0.96545	0.97904	0.936014	0.887852	0.537567	0.735684	0.563537	0.228242	47729000	Normalized LFQ intensity	0.379702	-0.280523	1.02401	10612.3	10612.3	47409.2	1.08129	10612.3	0.886533	-7.94803	Low confidence
BMS-690514	4 cell line mix	Kinobeads	DYRK1A	1	0.859699	0.987098	1.023	0.893854	0.945298	0.982284	0.737049	0	8100800	Normalized LFQ intensity	7.4967	-0.000781942	0.955898	3528.04	3528.04	3247.2	0.933007	3291.68	0.974279	-17.8732	High confidence
BMS-690514	4 cell line mix	Kinobeads	EGFR	1	0.99687	0.920211	1.05008	0.673075	0.416189	0.360698	0	0	9961100	Normalized LFQ intensity	0.924793	-0.0220446	1.01914	284.142	284.142	137.376	0.793047	225.338	0.959425	-8.814	High confidence
BMS-690514	4 cell line mix	Kinobeads	EIF3J	1	1.00276	0.905544	0.870527	0.996305	1.05392	1.02245	0.643353	0.283311	46759000	Normalized LFQ intensity	9.38568	0.28331	0.978789	3022.72	3022.72	223.297	1.10588	3022.72	0.948481	-16.1053	High confidence
BMS-690514	4 cell line mix	Kinobeads	EPHB3	1	1.07002	1.11121	1.11976	1.15694	1.25997	0.912583	0.578694	0	4141400	Normalized LFQ intensity	1.75059	-0.00125906	1.11522	3027.69	3027.69	746.748	0.87586	2651.83	0.960682	-10.4405	High confidence
BMS-690514	4 cell line mix	Kinobeads	FLT3	1	0.785692	0.754943	0.774129	0.764653	0.759662	0.649203	0.501189	0	5853700	Normalized LFQ intensity	1.24056	-0.00104798	0.813069	3742.7	3742.7	1881.96	0.537356	2011.16	0.924401	-10.5762	High confidence
BMS-690514	4 cell line mix	Kinobeads	FRK	1	0.73917	0.875078	1.01929	0.967389	1.07037	0.841944	0.626493	0.427659	142630000	Normalized LFQ intensity	2.14567	0.428155	0.942391	2341.83	2341.83	1264.89	0.339663	795.433	0.789184	-6.60387	High confidence
BMS-690514	4 cell line mix	Kinobeads	FYN	1	0.919297	0.857212	0.91525	0.93492	0.871459	0.696382	0.443889	0.318488	149460000	Normalized LFQ intensity	1.63427	0.314155	0.926267	1352.89	1352.89	281.279	0.431007	583.105	0.976652	-24.1121	High confidence
BMS-690514	4 cell line mix	Kinobeads	GAK	1	0.213212	0.0898754	0.0505452	0.00638556	0.00253008	0	0	0.018556	458420000	Normalized LFQ intensity	0.836742	0.00261113	0.999986	0.622383	0.622383	0.12154	0.56156	0.349505	0.999368	-51.0643	High confidence
BMS-690514	4 cell line mix	Kinobeads	HCK	1	0.886686	0.835561	0.894201	0.826111	0.829661	0.621058	0.395468	0.227803	268450000	Normalized LFQ intensity	1.19907	0.20774	0.900673	1373.88	1373.88	421.005	0.518348	712.15	0.968221	-19.9957	High confidence
BMS-690514	4 cell line mix	Kinobeads	LCK	1	0.831091	0.851655	0.852512	0.762831	0.804358	0.567789	0.353697	0.219247	429280000	Normalized LFQ intensity	-1.10955	0.879736	0.192877	1165.95	1165.95	468.317	0.440511	513.616	0.951593	-16.106	High confidence
BMS-690514	4 cell line mix	Kinobeads	LYN	1	0.850129	0.844022	0.963208	0.809725	0.901662	0.696705	0.448908	0.249821	514180000	Normalized LFQ intensity	1.53346	0.242399	0.901834	1766.54	1766.54	600.051	0.501873	886.58	0.942848	-15.2981	High confidence
BMS-690514	4 cell line mix	Kinobeads	MAP2K5	1	0.66955	0.701646	0.806745	0.884348	0.614045	0.446102	0.18784	0	43356000	Normalized LFQ intensity	1.22205	-0.00125647	0.813382	1109.43	1109.43	640.334	0.875759	971.591	0.901322	-5.53647	High confidence
BMS-690514	4 cell line mix	Kinobeads	MAP3K11	1	1.14705	0.943066	0.979926	1.68968	1.77445	1.08635	0.780272	0	9449400	Normalized LFQ intensity	2.25082	-0.00171079	1.24213	3738.83	3738.83	2943.56	0.696515	2604.16	0.661666	13.8398	High confidence
BMS-690514	4 cell line mix	Kinobeads	MAP3K2	1	1.03362	0.878198	0.964844	0.956454	0.87303	0.697314	0.46427	0.262716	43517000	Normalized LFQ intensity	1.16861	0.24013	0.974005	1508.85	1508.85	410.139	0.698286	1053.61	0.97669	-22.1514	High confidence
BMS-690514	4 cell line mix	Kinobeads	MAP3K3	1	0.735168	0.812425	0.887461	0.645081	0.606473	0.472809	0	0	20690000	Normalized LFQ intensity	1.0285	-0.0562612	0.850403	813.509	813.509	476.743	0.67104	545.897	0.916726	-5.28422	High confidence
BMS-690514	4 cell line mix	Kinobeads	MAP4K5	1	0.902976	0.83194	0.996721	0.887674	1.0396	0.917437	0.638339	0.39794	126450000	Normalized LFQ intensity	3.17053	0.397762	0.9425	2783.63	2783.63	637.25	0.744124	2071.37	0.903641	-14.0654	High confidence
BMS-690514	4 cell line mix	Kinobeads	MARK2	1	1.06373	0.881696	0.99562	0.970073	1.03116	1.00286	0.60904	0.331426	224610000	Normalized LFQ intensity	8.32644	0.331471	0.992171	2886.13	2886.13	752.94	0.753322	2174.19	0.959479	-18.6732	High confidence
BMS-690514	4 cell line mix	Kinobeads	MARK3	1	1.02061	0.910184	0.915736	0.917268	0.923872	0.876619	0.472401	0.263222	39131000	Normalized LFQ intensity	2.65262	0.262264	0.948924	2206.99	2206.99	318.658	0.770892	1701.35	0.978263	-23.1938	High confidence
BMS-690514	4 cell line mix	Kinobeads	PHKG2	1	1.05353	0.917221	1.42348	1.37499	1.31919	1.14946	0.965914	0	7088200	Normalized LFQ intensity	3.27207	-0.0015101	1.17801	4761.49	4761.49	32331.9	0.969809	4617.73	0.838195	3.70656	High confidence
BMS-690514	4 cell line mix	Kinobeads	PKMYT1	1	0.788739	0.810288	1.0044	0.889695	1.07989	0.850651	0.584809	0.353066	66579000	Normalized LFQ intensity	2.4264	0.35292	0.926364	2527.29	2527.29	1040.01	0.733505	1853.78	0.830264	-7.14397	High confidence
BMS-690514	4 cell line mix	Kinobeads	PKN1	1	0.816817	0.906272	0.901877	0.747078	0.752083	0.559072	0.260894	0	35728000	Normalized LFQ intensity	0.928493	-0.0442041	0.902407	1537.4	1537.4	600.126	0.874092	1343.83	0.969312	-15.7486	High confidence
BMS-690514	4 cell line mix	Kinobeads	PRKACA	1	0.76444	0.836377	1.00839	0.889573	0.954874	0.711616	0.453329	0.21589	258420000	Normalized LFQ intensity	1.71294	0.214271	0.910684	1949.19	1949.19	786.626	0.470095	916.304	0.9108	-10.0219	High confidence
BMS-690514	4 cell line mix	Kinobeads	PRKACB	1	0.930957	0.948305	0.877507	0.775622	1.02482	0.724378	0.408027	0	27757000	Normalized LFQ intensity	1.63024	-0.0119214	0.927021	2563.36	2563.36	772.907	0.472983	1212.43	0.948318	-10.7932	High confidence
BMS-690514	4 cell line mix	Kinobeads	PRKCA	1	0.961135	0.895312	0.955765	0.863146	0.965887	0.821354	0.505719	0.287738	95351000	Normalized LFQ intensity	2.04928	0.285436	0.941544	2137.9	2137.9	392.677	0.728153	1556.72	0.972032	-22.0453	High confidence
BMS-690514	4 cell line mix	Kinobeads	PRKCD	1	0.930192	0.953043	0.832897	1.00573	0.928065	0.601385	0.350927	0	29117000	Normalized LFQ intensity	1.32686	-0.0108191	0.953558	1838.62	1838.62	520.615	0.947106	1741.36	0.970931	-15.2578	High confidence
BMS-690514	4 cell line mix	Kinobeads	PRKCI	1	0.826026	0.854589	0.91793	0.795079	0.891623	0.656181	0.375915	0	23024000	Normalized LFQ intensity	1.33261	-0.0235248	0.890119	2422.34	2422.34	745.736	1.07425	2422.34	0.965214	-15.2615	High confidence
BMS-690514	4 cell line mix	Kinobeads	PRKD2	1	0.64368	0.574653	0.891214	0.472559	0.350606	0.0888693	0	0	44507000	Normalized LFQ intensity	1.06904	-0.0237496	0.79709	213.024	213.024	158.412	0.659146	140.414	0.871465	-0.887559	High confidence
BMS-690514	4 cell line mix	Kinobeads	PRKD3	1	0.853453	1.17329	1.06887	0.938503	0.608679	0.50042	0	0	18224000	Normalized LFQ intensity	1.16579	-0.0471657	1.02578	665.413	665.413	331.769	0.740225	492.556	0.933053	-3.60395	High confidence
BMS-690514	4 cell line mix	Kinobeads	Q6ZSR9	1	1.09493	0.842152	0.921446	0.801184	0.956707	0.766169	0.441243	0.248982	39422000	Normalized LFQ intensity	1.88446	0.245551	0.939734	1822.43	1822.43	704.388	0.761466	1387.72	0.904081	-8.94752	High confidence
BMS-690514	4 cell line mix	Kinobeads	RET	1	0.813975	0.57302	0.70348	0.511237	0.206187	0.147379	0.0111203	0.0459324	78508000	Normalized LFQ intensity	0.536611	-0.0521542	0.972276	76.5719	76.5719	59.0249	0.440569	33.7352	0.946129	-9.31742	High confidence
BMS-690514	4 cell line mix	Kinobeads	ROCK1	1	1.00186	0.938897	1.04374	0.99194	1.01388	1.1573	0.81707	0.57476	350830000	Normalized LFQ intensity	5.69124	0.574485	1.02109	3097.12	3097.12	435.941	0.909344	2816.35	0.874713	-15.5133	High confidence
BMS-690514	4 cell line mix	Kinobeads	SIK2	1	0.652396	0.566896	0.595047	0.421673	0.326704	0.260857	0.188591	0	42483000	Normalized LFQ intensity	0.287663	-0.130018	0.990424	92.9615	92.9615	89.0522	0.518256	48.1778	0.98406	-23.7003	High confidence
BMS-690514	4 cell line mix	Kinobeads	SLK	1	1.11689	0.932866	1.05028	0.909806	0.753337	0.983877	0.429688	0.225856	199680000	Normalized LFQ intensity	9.71323	0.225854	0.963871	2716.73	2716.73	3395.66	0.890695	2419.78	0.889465	-5.89022	High confidence
BMS-690514	4 cell line mix	Kinobeads	SRC	1	0.796198	0.847474	0.910632	0.933208	0.967073	0.86957	0.6532	0.404223	518670000	Normalized LFQ intensity	2.49721	0.402881	0.908268	2969.16	2969.16	824.711	0.388259	1152.8	0.896209	-15.1081	High confidence
BMS-690514	4 cell line mix	Kinobeads	STK10	1	1.08958	0.846058	0.979532	0.885732	0.842924	0.607511	0.317983	0.0868637	112890000	Normalized LFQ intensity	1.04708	0.0447375	0.980099	1399.17	1399.17	518.409	0.915468	1280.9	0.965039	-14.2538	High confidence
BMS-690514	4 cell line mix	Kinobeads	TGFBR1	1	0.733879	0.889167	0.953149	0.702979	0.939737	0.768249	0.364329	0.253006	36020000	Normalized LFQ intensity	2.94874	0.254354	0.869642	1772.54	1772.54	788.671	0.693169	1228.67	0.863271	-6.44946	High confidence
BMS-690514	4 cell line mix	Kinobeads	TNK2	1	0.874266	0.681222	0.919447	0.726856	0.490384	0.504191	0	0.159255	20066000	Normalized LFQ intensity	0.917239	0.0612608	0.889632	461.217	461.217	394.964	0.450162	207.623	0.86152	-1.64435	High confidence
BMS-690514	4 cell line mix	Kinobeads	YES1	1	1.01688	0.834964	1.0443	0.95575	1.07785	0.908054	0.590653	0.335202	33266000	Normalized LFQ intensity	2.40177	0.334413	0.987128	2484	2484	662.903	0.41317	1026.31	0.922571	-12.7742	High confidence
BMS-690514	4 cell line mix	Kinobeads	ZAK	1	0.795375	0.86478	0.809773	0.62005	0.661197	0.320847	0.184737	0.159229	37394000	Normalized LFQ intensity	0.714156	0.0862025	0.916985	379.64	379.64	239.436	0.743597	282.299	0.944115	-11.6657	High confidence
BMS-754807	4 cell line mix	Kinobeads	AURKA	1	1.23251	1.17615	1.09451	0.805708	0.505155	0.209541	0.134652	0.0351377	104240000	Normalized LFQ intensity	1.24126	0.0652711	1.14799	214.258	214.258	57.3311	0.353704	75.7839	0.97929	-12.8222	High confidence
BMS-754807	4 cell line mix	Kinobeads	AURKB	1	1.12213	1.05053	0.932089	0.823176	0.492632	0	0	0	18168000	Normalized LFQ intensity	1.60629	-0.0355137	1.03478	262.814	262.814	45.2847	0.585272	153.818	0.986849	-16.5138	High confidence
BMS-754807	4 cell line mix	Kinobeads	DDR1	1	1.0699	1.15067	1.07098	1.14531	1.04125	0.909125	0.65979	0	10144000	Normalized LFQ intensity	1.48721	-0.00173419	1.08085	3798.99	3798.99	851.744	0.627266	2382.98	0.98038	-17.9484	High confidence
BMS-754807	4 cell line mix	Kinobeads	DYNLL1	1	1.33737	1.48489	1.53083	1.55142	1.41447	0.737701	0.600705	0.23571	12000000	Normalized LFQ intensity	2.79715	0.391816	1.39345	843.448	843.448	399.224	0.500942	422.519	0.849779	5.13154	High confidence
BMS-754807	4 cell line mix	Kinobeads	EPHA2	1	1.11989	1.11989	1.17287	1.20677	1.06879	1.03097	0.779221	0.408866	77865000	Normalized LFQ intensity	1.64774	0.390332	1.118	3268.34	3268.34	1098.64	0.412958	1349.69	0.947393	-15.9133	High confidence
BMS-754807	4 cell line mix	Kinobeads	FER	1	1.08509	1.12607	1.17545	1.07999	0.99461	0.749957	0.605634	0.271176	279210000	Normalized LFQ intensity	1.01316	0.230965	1.10245	1892.94	1892.94	789.085	0.422267	799.325	0.966851	-16.901	High confidence
BMS-754807	4 cell line mix	Kinobeads	FES	1	1.10502	1.08354	1.16898	1.22494	1.05567	1.00484	0.840557	0.385523	252560000	Normalized LFQ intensity	1.30626	0.321115	1.10955	4786.73	4786.73	3339.35	0.369564	1769	0.935726	-14.1629	High confidence
BMS-754807	4 cell line mix	Kinobeads	FLT3	1	1.12002	1.03914	1.33354	1.31503	1.15768	1.37019	0.800623	0	7336200	Normalized LFQ intensity	6.61383	-0.00135387	1.19083	3345.77	3345.77	1030.69	0.537356	1797.87	0.906278	-1.36077	High confidence
BMS-754807	4 cell line mix	Kinobeads	IGF1R	1	0.867377	0.328546	0.082348	0.0201201	0	0	0	0	156540000	Normalized LFQ intensity	2.03252	0.00656135	1.0056	7.10763	7.10763	0.257416	0.661793	4.70378	0.999126	-44.3997	High confidence
BMS-754807	4 cell line mix	Kinobeads	INSR	1	0.950538	0.712843	0.522151	0	0	0	0	0	27811000	Normalized LFQ intensity	1.58426	-0.00174028	0.970025	26.2676	26.2676	6.11196	0.750837	19.7227	0.982728	-15.7924	High confidence
BMS-754807	4 cell line mix	Kinobeads	MET	1	2.14876	0.834367	0.57728	0	0	0	0	0	806420	Normalized Intensity	1.83348	-0.00214705	1.50429	17.8917	17.8917	13.7255	0.803492	14.3759	0.803266	15.3209	Low confidence
BMS-754807	4 cell line mix	Kinobeads	NEK9	1	1.04805	1.04623	1.0755	0.927784	0.86404	0.624927	0.335834	0.0436477	1153100000	Normalized LFQ intensity	0.983348	-0.00926768	1.04138	1482.23	1482.23	260.146	0.441168	653.911	0.993275	-27.6512	High confidence
BMS-754807	4 cell line mix	Kinobeads	PLK4	1	1.24175	1.49093	0	0	0	0	0	0	5160800	Normalized LFQ intensity	13.361	-0.00156308	1.24424	20.2823	20.2823	24.9469	0.509269	10.3292	0.962508	-2.28538	Low confidence
BMS-754807	4 cell line mix	Kinobeads	PRKAA1	1	1.08541	1.09417	1.03845	0.987911	0.769126	0.602545	0.469353	0.139524	546900000	Normalized LFQ intensity	0.740325	0.0606018	1.07614	1356.76	1356.76	608.241	0.637811	865.354	0.981694	-20.3459	High confidence
BMS-754807	4 cell line mix	Kinobeads	PRKAB1	1	1.43427	1.42528	1.44873	1.44625	1.17391	0.650009	0.528192	0.191638	175210000	Normalized LFQ intensity	1.53515	0.262857	1.35677	830.571	830.571	536.463	0.662068	549.894	0.891119	2.02869	High confidence
BMS-754807	4 cell line mix	Kinobeads	PRKAG1	1	1.22095	1.14577	1.15285	1.19783	0.918491	0.486512	0.466857	0.163572	504520000	Normalized LFQ intensity	1.45664	0.24202	1.1523	646.044	646.044	329.783	0.632872	408.863	0.943153	-7.30996	High confidence
BMS-754807	4 cell line mix	Kinobeads	PRKAG2	1	0.97117	1.02624	0.911168	1.20277	0.95958	0	0	0	4365000	Normalized LFQ intensity	7.98959	-0.00183581	1.02224	422.387	422.387	1512.26	0.644818	272.363	0.977103	-10.5661	High confidence
BMS-754807	4 cell line mix	Kinobeads	PTK2	1	1.03355	0.790064	0.503517	0.263576	0.14171	0.0765138	0.0621236	0.0330238	806780000	Normalized LFQ intensity	1.14202	0.0590188	1.0412	27.6117	27.6117	4.02253	0.408006	11.2657	0.993857	-26.3612	High confidence
BMS-754807	4 cell line mix	Kinobeads	PTK2B	1	1.12927	1.0828	0.984012	0.770086	0.513672	0.394434	0.284415	0.104885	423480000	Normalized LFQ intensity	0.878502	0.14231	1.09365	235.966	235.966	89.6852	0.414584	97.8275	0.978695	-16.5423	High confidence
BMS-754807	4 cell line mix	Kinobeads	RET	1	1.19194	1.21029	1.28961	1.32121	1.16222	0.831743	0.673641	0.371467	86430000	Normalized LFQ intensity	1.37395	0.379176	1.20623	1532.84	1532.84	865.674	0.440569	675.323	0.903228	-6.00888	High confidence
BMS-754807	4 cell line mix	Kinobeads	TNK1	1	0.770687	0.862357	0.70343	0.614554	0.573719	0.167574	0.0855765	0	5370400	Normalized Intensity	0.678684	-0.0721956	0.913108	351.368	351.368	208.445	0.432597	152	0.954534	-10.7279	High confidence
BMS-777607	4 cell line mix	Kinobeads	ABL1	1	0.776426	1.00852	0.828126	0.580727	0.626909	0.430682	0.277424	0.0681384	98850000	Normalized LFQ intensity	0.462235	-0.119761	0.98124	954.5	954.5	1612.31	0.547922	522.992	0.931447	-9.12861	High confidence
BMS-777607	4 cell line mix	Kinobeads	ABL2	1	0.941037	0.969499	0.878948	0.717682	0.797161	0.615678	0.468555	0.228198	116200000	Normalized LFQ intensity	0.415858	-0.129658	1.00383	4551.46	4551.46	9243.69	0.331378	1508.25	0.969158	-20.1937	High confidence
BMS-777607	4 cell line mix	Kinobeads	AURKB	1	0.867469	1.04411	0.974314	1.12318	0.853147	0.666225	0.347075	0	8067000	Normalized LFQ intensity	1.27266	-0.0213823	0.997655	1832.55	1832.55	625.241	0.585272	1072.54	0.958813	-11.1532	High confidence
BMS-777607	4 cell line mix	Kinobeads	DDR1	1	1.44955	1.42389	1.47369	0	0	0	0	0	981890	Normalized Intensity	11.7856	-0.00155959	1.33684	62.2121	62.2121	110.005	0.627266	39.0236	0.963003	-0.169855	High confidence
BMS-777607	4 cell line mix	Kinobeads	DDR2	1	0.681876	1.00232	0.854652	0.424822	0.145661	0.138759	0.204855	0.120913	41431000	Normalized LFQ intensity	3.2983	0.150009	0.890922	84.8517	84.8517	26.6809	0.762065	64.6625	0.937081	-6.85916	High confidence
BMS-777607	4 cell line mix	Kinobeads	FLT3	1	1.06303	1.09019	1.04151	1.05072	0.963292	0	0	0	2406900	Normalized LFQ intensity	6.96048	-0.00113449	1.04911	424.657	424.657	174.147	0.537356	228.192	0.997975	-32.1685	Low confidence
BMS-777607	4 cell line mix	Kinobeads	FRK	1	1.46044	1.15206	1.32752	1.39699	0.942837	0.572109	0.339794	0	53153000	Normalized LFQ intensity	1.2125	-0.00144661	1.27021	971.091	971.091	599.798	0.339663	329.843	0.909427	1.59654	High confidence
BMS-777607	4 cell line mix	Kinobeads	LCK	1	1.21058	1.05453	1.16076	1.29732	1.09228	0.896587	0.805359	0.383349	176740000	Normalized LFQ intensity	1.08069	0.315026	1.14122	3566.27	3566.27	3201.62	0.440511	1570.98	0.882498	-7.14992	High confidence
BMS-777607	4 cell line mix	Kinobeads	MAP2K5	1	0.765421	0.754738	0.735856	0.955511	0.708703	0.736324	0.486963	0.277498	28706000	Normalized LFQ intensity	1.4295	0.260164	0.830145	2380.34	2380.34	1668.98	0.875759	2084.61	0.807305	-6.59999	High confidence
BMS-777607	4 cell line mix	Kinobeads	MAP4K2	1	0.978705	1.02448	0.981078	0.970836	1.02242	1.0632	0.801349	0	7835400	Normalized LFQ intensity	8.6026	-0.000269647	1.00582	3516.38	3516.38	1976.37	0.590017	2074.73	0.992729	-28.539	High confidence
BMS-777607	4 cell line mix	Kinobeads	MET	1	0.738994	0.74809	0	0	0	0	0	0	1023500	Normalized Intensity	6.35026	-0.00119935	0.869577	13.3151	13.3151	8.51244	0.803492	10.6986	0.975984	-13.6631	High confidence
BMS-777607	4 cell line mix	Kinobeads	PLK4	1	13.3194	14.9467	25.5813	18.1049	9.37618	5.74076	1.7669	0.791488	232600	Normalized Intensity	1.90595	1.20907	14.3659	591.671	591.671	1163.02	0.509269	301.32	0.446188	68.9461	Low confidence
BMS-911543	4 cell line mix	Kinobeads	NQO2	1	0.993997	0.955282	1.0693	0.930353	1.0671	0.907377	0.796691	0.352252	389670000	Normalized LFQ intensity	1.32503	0.278023	1.00149	5864.28	5864.28	5103.25	1.06667	5864.28	0.951891	-19.0294	High confidence
Bosutinib	4 cell line mix	Kinobeads	AAK1	1	1.13542	1.22258	1.30805	1.01106	1.20651	0.949523	0.793666	0.546152	327280000	Normalized LFQ intensity	1.36523	0.53343	1.15056	2185.92	2185.92	1626.82	0.673073	1471.28	0.819962	-5.79974	Low confidence
Bosutinib	4 cell line mix	Kinobeads	ABL1	1	1.13405	0.838507	0.617417	0.160924	0.0915999	0.0182087	0.00346543	0	404230000	Normalized LFQ intensity	1.43845	0.0100846	1.05963	34.0434	34.0434	6.36415	0.547922	18.6531	0.986779	-17.1662	High confidence
Bosutinib	4 cell line mix	Kinobeads	ABL2	1	1.16229	0.958635	0.783425	0.360207	0.185784	0.0607257	0	0	528700000	Normalized LFQ intensity	1.25571	0.0137272	1.08139	61.7393	61.7393	12.3339	0.331378	20.459	0.987777	-17.6451	High confidence
Bosutinib	4 cell line mix	Kinobeads	BCR	1	0.690965	0.425952	0.181229	0	0	0	0	0	111730000	Normalized LFQ intensity	1.08514	-0.00177919	0.993274	7.07245	7.07245	0.748794	0.477847	3.37955	0.996381	-32.9435	High confidence
Bosutinib	4 cell line mix	Kinobeads	BMP2K	1	1.24405	1.28776	1.15922	1.00671	1.20407	0.716334	0.448917	0.186459	237190000	Normalized LFQ intensity	1.56536	0.19724	1.1615	1315.86	1315.86	578.832	0.660952	869.72	0.923599	-4.80176	High confidence
Bosutinib	4 cell line mix	Kinobeads	BTK	1	1.15712	0.975952	0.770202	0.409314	0.191016	0.0677061	0.0327484	0.0119424	4495000000	Normalized LFQ intensity	1.2174	0.0263958	1.0818	64.5754	64.5754	12.1202	0.390881	25.2413	0.9897	-19.5112	High confidence
Bosutinib	4 cell line mix	Kinobeads	CLK1	1	0.815531	0.682752	0.67845	0.577321	0.598403	0.651207	0	0	11090000	Normalized LFQ intensity	0.464757	-0.124336	0.906686	835.525	835.525	1610.44	0.715477	597.8	0.813646	0.930761	Low confidence
Bosutinib	4 cell line mix	Kinobeads	CSK	1	1.1779	0.88099	1.06008	0.816299	0.603867	0.316064	0.169001	0.0618874	1945000000	Normalized LFQ intensity	1.01595	0.0563682	1.05117	362.841	362.841	147.683	0.538187	195.276	0.963247	-10.3791	High confidence
Bosutinib	4 cell line mix	Kinobeads	CSNK1D	1	0.82331	0.647327	0.832873	0.752327	0.9871	0.739683	0.636269	0.28907	282900000	Normalized LFQ intensity	1.65301	0.269076	0.835353	4176.36	4176.36	4352.05	0.822647	3435.67	0.735991	-4.26023	Low confidence
Bosutinib	4 cell line mix	Kinobeads	EPHA2	1	1.27461	1.1083	1.13914	0.86192	0.593938	0.240456	0.117852	0.0411123	265990000	Normalized LFQ intensity	1.22436	0.0484444	1.14459	284.769	284.769	84.0359	0.412958	117.598	0.974841	-11.0971	High confidence
Bosutinib	4 cell line mix	Kinobeads	EPHA4	1	1.29598	0.807869	0.734491	0.619488	0.517775	0.207466	0.174275	0.148408	48023000	Normalized LFQ intensity	0.728319	0.11754	1.10488	96.047	96.047	86.9362	0.616594	59.222	0.904058	-2.32976	High confidence
Bosutinib	4 cell line mix	Kinobeads	EPHB2	1	1.54248	1.2908	1.35982	1.07545	0.896551	0.497513	0.301811	0.143335	1750100000	Normalized LFQ intensity	1.15428	0.150171	1.29932	494.374	494.374	295.419	0.524262	259.181	0.912774	0.623043	High confidence
Bosutinib	4 cell line mix	Kinobeads	EPHB3	1	1.72743	1.35359	1.60219	1.36327	1.38787	1.16145	0.596439	0.342196	53719000	Normalized LFQ intensity	2.13635	0.339993	1.41025	1746.05	1746.05	951.892	0.87586	1529.29	0.812551	6.24105	High confidence
Bosutinib	4 cell line mix	Kinobeads	EPHB4	1	1.054	0.990847	0.975993	0.674067	0.487306	0.264871	0.22879	0.0651671	110930000	Normalized LFQ intensity	0.953804	0.102767	1.04582	200.007	200.007	51.107	0.494832	98.9701	0.987573	-21.0853	High confidence
Bosutinib	4 cell line mix	Kinobeads	FANCI	1	0.800696	0.549421	0.803424	0.389555	0	0	0	0	16364000	Normalized LFQ intensity	7.48313	-0.00081676	0.788408	99.7138	99.7138	10.8851	0.965439	96.2676	0.923986	-3.76947	High confidence
Bosutinib	4 cell line mix	Kinobeads	FER	1	1.25825	1.05504	1.22939	1.00331	1.09919	0.870131	0.638292	0.394903	488400000	Normalized LFQ intensity	1.27783	0.376157	1.12098	1816.03	1816.03	988.401	0.422267	766.85	0.899465	-8.17658	High confidence
Bosutinib	4 cell line mix	Kinobeads	FRK	1	1.12804	0.615833	0.791832	0.464565	0.307162	0.131308	0.0460663	0.0286013	349910000	Normalized LFQ intensity	0.711764	-0.00475779	1.04003	79.8414	79.8414	60.3729	0.339663	27.1191	0.926866	-4.1153	High confidence
Bosutinib	4 cell line mix	Kinobeads	FYN	1	1.28387	0.935036	1.08392	0.770527	0.744629	0.383766	0.223172	0.119417	284780000	Normalized LFQ intensity	0.879161	0.0858913	1.09923	414.382	414.382	256.97	0.431007	178.602	0.931549	-5.03314	High confidence
Bosutinib	4 cell line mix	Kinobeads	GAK	1	1.05555	0.836611	0.866083	0.351818	0.233782	0.072572	0.0252505	0.00150053	1574300000	Normalized LFQ intensity	1.21507	0.0213096	1.01525	75.0757	75.0757	19.9507	0.56156	42.1595	0.978559	-13.8566	High confidence
Bosutinib	4 cell line mix	Kinobeads	HCK	1	0.867852	0.795387	0.849228	0.62324	0.494873	0.240434	0.127845	0.0682849	1164300000	Normalized LFQ intensity	0.751939	0.0217676	0.94014	261.88	261.88	89.4899	0.518348	135.745	0.982043	-19.7349	High confidence
Bosutinib	4 cell line mix	Kinobeads	IKBKE	1	1.3566	1.15326	1.30431	1.01834	1.22098	0.624443	0.352105	0	45783000	Normalized LFQ intensity	1.40773	-0.00134486	1.19364	1349.56	1349.56	648.651	0.620827	837.845	0.921294	-1.09646	High confidence
Bosutinib	4 cell line mix	Kinobeads	INPPL1	1	0.669899	0.387468	0.0927987	0.0500443	0.143727	0.0242728	0.126191	0.0589192	9374700	Normalized Intensity	1.33587	0.0709781	0.993746	5.14306	5.14306	1.0765	0.483409	2.4862	0.980832	-19.5279	Low confidence
Bosutinib	4 cell line mix	Kinobeads	LCK	1	0.913123	0.754986	0.793661	0.389296	0.246588	0.103371	0.0484229	0.0304779	1139100000	Normalized LFQ intensity	0.908266	0.019073	0.968758	78.4344	78.4344	23.5526	0.440511	34.5512	0.981598	-17.3814	High confidence
Bosutinib	4 cell line mix	Kinobeads	LYN	1	1.18494	0.819832	0.876847	0.550263	0.412925	0.170605	0.0880712	0.044954	1502900000	Normalized LFQ intensity	0.831851	0.0288799	1.06624	124.849	124.849	61.4465	0.501873	62.6584	0.960211	-9.15975	High confidence
Bosutinib	4 cell line mix	Kinobeads	MAP2K1	1	1.55363	0.975933	1.45561	1.29297	1.1444	1.06337	0.735335	0	19531000	Normalized LFQ intensity	1.48701	-0.00152142	1.24208	3667.53	3667.53	2583.97	1.23132	3667.53	0.832019	5.41929	High confidence
Bosutinib	4 cell line mix	Kinobeads	MAP2K2	1	1.63486	1.26325	1.45441	1.16857	1.23716	0.870852	0.471246	0.275203	50624000	Normalized LFQ intensity	1.53855	0.264876	1.31513	1223.33	1223.33	729.83	1.17379	1223.33	0.846364	3.94986	High confidence
Bosutinib	4 cell line mix	Kinobeads	MAP2K5	1	1.49041	1.78894	1.70946	1.64064	1.53488	1.14788	0.711197	0.274058	51306000	Normalized LFQ intensity	1.60736	0.269566	1.53391	1906.22	1906.22	1266.9	0.875759	1669.39	0.807769	8.62454	High confidence
Bosutinib	4 cell line mix	Kinobeads	MAP3K1	1	1.18066	1.00333	0.968625	0.572206	0.489573	0.266016	0.128843	0	232170000	Normalized LFQ intensity	0.814485	0.0126852	1.10424	184.779	184.779	87.1442	0.577183	106.651	0.969176	-10.9299	High confidence
Bosutinib	4 cell line mix	Kinobeads	MAP3K2	1	1.40201	1.27283	1.41107	1.03505	1.4698	0.703264	0.448175	0.271814	79767000	Normalized LFQ intensity	6.89431	0.359673	1.26511	931.466	931.466	261.909	0.698286	650.43	0.857484	3.16022	High confidence
Bosutinib	4 cell line mix	Kinobeads	MAP3K3	1	1.46266	1.26794	1.60419	1.15258	1.19127	0.824672	0.563728	0	6729100	Normalized LFQ intensity	1.09008	-0.00180164	1.31247	1953.5	1953.5	1428.52	0.67104	1310.87	0.87599	3.88933	High confidence
Bosutinib	4 cell line mix	Kinobeads	MAP3K4	1	1.2568	1.01535	1.21114	1.27881	1.18093	0.810083	0.736984	0.325134	37926000	Normalized LFQ intensity	1.18312	0.295936	1.15976	2435.24	2435.24	1937.97	0.671624	1635.57	0.864407	-3.48862	High confidence
Bosutinib	4 cell line mix	Kinobeads	MAP4K1	1	1.33193	1.24694	1.32881	0.895737	1.09635	0.498864	0.451224	0	12785000	Normalized LFQ intensity	0.933174	-0.00132573	1.21292	1128.94	1128.94	929.866	0.726208	819.843	0.890569	1.64057	High confidence
Bosutinib	4 cell line mix	Kinobeads	MAP4K2	1	1.2606	0.751598	0.960389	0.562821	0.38373	0	0	0	38958000	Normalized LFQ intensity	1.10622	-0.00142438	1.05162	130.811	130.811	75.023	0.590017	77.1804	0.925474	-1.07237	High confidence
Bosutinib	4 cell line mix	Kinobeads	MAP4K3	1	1.72364	1.21976	0.976504	0.694375	0	0	0	0	26515000	Normalized LFQ intensity	1.58206	-0.0331638	1.30769	88.2685	88.2685	48.4082	0.655746	57.8817	0.903774	6.67585	High confidence
Bosutinib	4 cell line mix	Kinobeads	MAP4K5	1	1.25281	0.71193	0.480837	0.0512311	0	0	0	0	208100000	Normalized LFQ intensity	1.50494	-0.00846804	1.11417	21.0567	21.0567	6.6	0.744124	15.6688	0.961872	-6.63159	High confidence
Bosutinib	4 cell line mix	Kinobeads	PAG1	1	1.31025	1.46515	1.07333	0.812334	0.576499	0.276082	0	0	15429000	Normalized LFQ intensity	1.08687	-0.00148347	1.24334	238.522	238.522	129.898	0.49264	117.506	0.935609	-0.168072	High confidence
Bosutinib	4 cell line mix	Kinobeads	PDGFRB	1	1.19916	0.948499	1.13695	0.953099	1.19438	1.06094	0.772755	0.501852	25879000	Normalized LFQ intensity	3.59184	0.501892	1.07216	2917.21	2917.21	786.42	0.873974	2549.57	0.824419	-7.1838	Low confidence
Bosutinib	4 cell line mix	Kinobeads	PKMYT1	1	1.26258	1.19666	1.07121	1.09261	0.938661	0.710992	0.318627	0.124415	151170000	Normalized LFQ intensity	1.22717	0.0948433	1.13425	1194.17	1194.17	379.512	0.733505	875.929	0.96383	-11.0707	High confidence
Bosutinib	4 cell line mix	Kinobeads	Q6ZSR9	1	1.15549	1.30336	1.42947	1.13005	1.22355	0.973005	0.792226	0.563018	127470000	Normalized LFQ intensity	1.41109	0.558023	1.21337	1782.59	1782.59	1395.54	0.761466	1357.38	0.796144	-2.67929	High confidence
Bosutinib	4 cell line mix	Kinobeads	SIK2	1	1.18344	0.936027	0.950485	0.722005	0.708472	0.266896	0.145773	0	96752000	Normalized LFQ intensity	0.878543	-0.00121044	1.05126	396.73	396.73	182.545	0.518256	205.607	0.960878	-9.32001	High confidence
Bosutinib	4 cell line mix	Kinobeads	SIK3	1	1.38693	0.898078	1.08562	1.11445	0	0	0	0	10508000	Normalized LFQ intensity	14.1147	-0.00139561	1.09702	195.897	195.897	854.933	0.818608	160.363	0.952459	-1.37188	Low confidence
Bosutinib	4 cell line mix	Kinobeads	SLK	1	1.16008	1.18203	1.37108	1.07544	1.10958	0.552612	0.165935	0.00655362	400410000	Normalized LFQ intensity	1.93559	0.0118161	1.16763	980.513	980.513	262.51	0.890695	873.338	0.957203	-5.89785	High confidence
Bosutinib	4 cell line mix	Kinobeads	SRC	1	1.27263	0.867137	1.09867	0.750917	0.724835	0.390604	0.209584	0.103583	908970000	Normalized LFQ intensity	0.849857	0.0651298	1.08371	433.637	433.637	308.678	0.388259	168.364	0.916252	-3.21746	High confidence
Bosutinib	4 cell line mix	Kinobeads	STK10	1	1.17423	0.763763	1.19254	0.76679	0.658201	0.590333	0.173047	0.0117168	330510000	Normalized LFQ intensity	0.75251	-0.0825016	1.04064	958.415	958.415	999.13	0.915468	877.399	0.873659	0.707119	High confidence
Bosutinib	4 cell line mix	Kinobeads	STK24	1	1.96302	1.65811	0.460222	0.585118	0	0.476649	0.509458	0	1760500	Normalized Intensity	11.9703	0.313024	1.54039	25.3989	25.3989	80.967	1.06268	25.3989	0.779977	14.9644	Low confidence
Bosutinib	4 cell line mix	Kinobeads	TANK	1	1.14374	1.10925	1.26321	1.05634	1.16551	0.932775	0.674491	0.44648	197770000	Normalized LFQ intensity	1.70377	0.444541	1.12547	1929.23	1929.23	744.032	0.63618	1227.34	0.917354	-11.1579	High confidence
Bosutinib	4 cell line mix	Kinobeads	TBK1	1	1.36365	1.16188	1.33639	1.14458	1.36622	1.01646	0.759886	0.591582	1186100000	Normalized LFQ intensity	2.12331	0.603945	1.22705	1598.2	1598.2	1084.24	0.639531	1022.1	0.796504	-2.31948	High confidence
Bosutinib	4 cell line mix	Kinobeads	TBKBP1	1	1.31018	1.69443	1.62278	1.63684	1.7418	1.37697	1.01975	0.619819	18887000	Normalized LFQ intensity	2.32784	0.618696	1.49587	2741.36	2741.36	1820.18	0.793595	2175.53	0.647628	8.96061	High confidence
Bosutinib	4 cell line mix	Kinobeads	TNIK	1	1.0606	0.537866	0.54976	0.260173	0.15858	0.0552996	0.0619772	0.0207287	6364600	Normalized Intensity	0.866574	0.037941	1.05051	22.5042	22.5042	11.6817	1.02305	22.5042	0.949041	-7.73736	Low confidence
Bosutinib	4 cell line mix	Kinobeads	TNK2	1	2.61572	1.28892	1.78897	1.08891	0.84253	0.484164	0.211435	0	50239000	Normalized LFQ intensity	0.956369	-0.00257106	1.70026	306.457	306.457	486.747	0.450162	137.955	0.69547	20.9334	High confidence
Bosutinib	4 cell line mix	Kinobeads	WEE1	1	1.01146	0.992105	1.0298	0.894049	1.12981	0.854232	0.687588	0.329714	212750000	Normalized LFQ intensity	1.51253	0.308846	1.00684	3200.88	3200.88	1407.95	0.632874	2025.76	0.924324	-13.279	High confidence
Bosutinib	4 cell line mix	Kinobeads	YES1	1	1.46863	1.04294	1.04056	0.828099	0.771842	0.459148	0.277556	0.13141	131630000	Normalized LFQ intensity	0.766787	0.091315	1.18435	415.51	415.51	373.807	0.41317	171.677	0.897523	-0.481234	High confidence
Bosutinib	4 cell line mix	Kinobeads	ZAK	1	1.39243	1.36311	1.2325	1.16836	1.27587	0.784394	0.514225	0.129609	62279000	Normalized LFQ intensity	1.35807	0.123044	1.25249	1630.87	1630.87	809.949	0.743597	1212.71	0.915546	-1.94994	High confidence
Brivanib	4 cell line mix	Kinobeads	CALM1	1	0.739622	1.26996	0.396271	0.651528	0	0	0	0	5802800	Normalized LFQ intensity	1.1754	-0.0326191	0.967884	82.1795	82.1795	81.9921	1.09736	82.1795	0.799347	8.13074	Low confidence
Brivanib	4 cell line mix	Kinobeads	DDR1	1	1.02177	1.06235	0.995506	1.10583	1.09007	0.864548	0.610191	0.459124	15090000	Normalized LFQ intensity	2.01961	0.464661	1.04675	1625.11	1625.11	384.05	0.627266	1019.38	0.966319	-21.6355	High confidence
Brivanib	4 cell line mix	Kinobeads	MAP4K4	1	0.897722	0.813018	0.882545	0.739443	0.730687	0.620976	0.510418	0.229046	3938600	Normalized LFQ intensity	0.329155	-0.429782	0.977541	22756.9	22756.9	33697.6	1.01351	22756.9	0.97919	-25.4885	High confidence
Brivanib	4 cell line mix	Kinobeads	PDGFRB	1	0.925424	1.18063	1.01374	0.898993	1.06203	0.991529	0.71153	0.43975	10838000	Normalized LFQ intensity	3.14507	0.439419	1.01319	2902.3	2902.3	755.913	0.873974	2536.53	0.865701	-9.96357	High confidence
Brivanib	4 cell line mix	Kinobeads	RET	1	1.10744	0.984599	0.989404	1.00636	0.931706	0.941075	0.758094	0.472352	53316000	Normalized LFQ intensity	0.815837	0.312483	1.02301	6490.61	6490.61	12626.5	0.440569	2859.56	0.952397	-21.9717	High confidence
Brivanib	4 cell line mix	Kinobeads	SLK	1	1.01263	1.00502	0.988916	0.921312	0.927157	1.00336	0.707472	0.368768	166530000	Normalized LFQ intensity	8.58112	0.368771	0.979776	3077.27	3077.27	380.173	0.890695	2740.91	0.975783	-25.689	High confidence
Brivanib	4 cell line mix	Kinobeads	STK10	1	0.940729	1.00005	0.918157	0.909822	0.780271	0.808021	0.533305	0.169447	87959000	Normalized LFQ intensity	0.570935	-0.29646	0.983267	11097.8	11097.8	25619.7	0.915468	10159.6	0.974297	-20.9039	High confidence
Brivanib	4 cell line mix	Kinobeads	STRADA	1	0.987325	0.950609	0.896132	1.32671	1.26206	0.887232	0	0	3394500	Normalized LFQ intensity	12.3138	-0.00198264	1.07048	1136.86	1136.86	10380.5	1.02005	1136.86	0.915608	0.202963	Low confidence
Brivanib	4 cell line mix	Kinobeads	VDAC3	1	0.739687	0.348314	0.290318	0.284432	0.165073	0.478129	0.31579	0.22427	2571900	Normalized Intensity	2.50546	0.292427	0.999689	3.72997	3.72997	1.15994	1.26292	3.72997	0.906036	-9.18945	Low confidence
Brivanib_alaninate	4 cell line mix	Kinobeads	DDR1	1	1.01373	1.06114	0.990012	0.977457	0.87865	0.64358	0.690816	0.396164	22012000	Normalized LFQ intensity	0.682331	0.326728	1.03653	1656.1	1656.1	1639.61	0.627266	1038.82	0.947643	-17.9416	High confidence
Brivanib_alaninate	4 cell line mix	Kinobeads	FGFR1	1	0.870684	1.17686	1.19876	1.04738	1.11861	0.803251	0.810553	0	1824000	Normalized LFQ intensity	1.50286	-0.00198408	1.05282	5290.6	5290.6	3130.74	0.736349	3895.73	0.889765	-2.45985	High confidence
Brivanib_alaninate	4 cell line mix	Kinobeads	MAP4K4	1	1.02096	0.861869	0.829747	0.58391	0.745754	0.733536	0.597865	0.259931	3901300	Normalized LFQ intensity	0.285326	-0.483641	1.0064	46183.5	46183.5	178656	1.01351	46183.5	0.844846	-7.31577	High confidence
Brivanib_alaninate	4 cell line mix	Kinobeads	NUAK2	1	0.741512	0.512282	0.39172	0.46819	0.369257	0.457061	0.639036	0.285252	2108800	Normalized Intensity	1.88951	0.435532	0.999364	3.31772	3.31772	1.69429	0.771634	2.56007	0.813628	-6.82289	Low confidence
Brivanib_alaninate	4 cell line mix	Kinobeads	PDGFRB	1	1.14549	1.16538	1.03863	0.908258	0.641383	0.618831	0.463964	0	10854000	Normalized LFQ intensity	0.561709	-0.216155	1.11791	2164.83	2164.83	2614.34	0.873974	1892.01	0.949486	-8.72641	High confidence
Brivanib_alaninate	4 cell line mix	Kinobeads	RET	1	1.06366	1.03339	1.04623	0.99364	0.830038	0.873756	0.75797	0.450728	71775000	Normalized LFQ intensity	0.506345	0.0123004	1.04535	16985.9	16985.9	47129.9	0.440569	7483.48	0.949963	-20.6844	High confidence
Brivanib_alaninate	4 cell line mix	Kinobeads	SLK	1	0.901927	0.902731	0.943927	0.769925	0.499675	0.802647	0.744348	0.388767	269310000	Normalized LFQ intensity	0.283269	0.0475231	1.00277	10651.9	10651.9	50126.6	0.890695	9487.59	0.676046	-3.14818	High confidence
Brivanib_alaninate	4 cell line mix	Kinobeads	STK10	1	1.00932	1.04917	1.02709	1.0033	0.963372	0.915848	0.788187	0.283105	124790000	Normalized LFQ intensity	0.978361	0.0547008	1.01782	9222.53	9222.53	3863.78	0.915468	8442.94	0.995217	-38.1669	High confidence
BYL-719	4 cell line mix	Kinobeads	GAK	1	1.44306	1.4649	1.53228	1.42781	1.4157	1.21078	1.23969	0.640409	160900000	Normalized LFQ intensity	1.26735	0.49041	1.37199	8846.51	8846.51	19778.4	0.56156	4967.84	0.69741	2.20239	High confidence
BYL-719	4 cell line mix	Kinobeads	PRKACG	1	1.42085	1.07882	0.883752	0.855553	1.27706	0.768633	0.644181	0	11480000	Normalized LFQ intensity	1.17474	-0.0639179	1.0845	3875.32	3875.32	4573.14	0.513401	1989.59	0.789333	5.41639	High confidence
Cabozantinib	4 cell line mix	Kinobeads	ABL1	1	1.37746	1.45853	1.38486	1.43593	1.41958	1.17207	0.626584	0.344558	64878000	Normalized LFQ intensity	2.39818	0.345554	1.34591	2004.14	2004.14	766.799	0.547922	1098.11	0.884317	-0.29663	High confidence
Cabozantinib	4 cell line mix	Kinobeads	ABL2	1	1.46822	1.22391	1.3787	1.50664	1.27289	1.24627	0.867769	0.505122	75416000	Normalized LFQ intensity	2.40609	0.502657	1.30927	2770.9	2770.9	1219.75	0.331378	918.214	0.79064	0.969401	High confidence
Cabozantinib	4 cell line mix	Kinobeads	BCR	1	1.03547	1.21696	1.26141	1.05465	0.99656	0.794089	0.732502	0.597654	16075000	Normalized LFQ intensity	1.27513	0.618057	1.1226	716.617	716.617	580.601	0.477847	342.433	0.850181	-8.92885	High confidence
Cabozantinib	4 cell line mix	Kinobeads	DDR1	1	1.7277	1.42794	1.20025	1.45115	0.906	0	0	0	4965200	Normalized LFQ intensity	6.48997	-0.00178754	1.36142	333.668	333.668	181.182	0.627266	209.299	0.919774	6.01596	High confidence
Cabozantinib	4 cell line mix	Kinobeads	DDR2	1	2.0635	2.19068	2.13261	1.20904	1.55554	0.52049	0.041653	0	36602000	Normalized LFQ intensity	1.89125	-0.00218661	1.7516	657.56	657.56	471.146	0.762065	501.103	0.788824	18.8913	High confidence
Cabozantinib	4 cell line mix	Kinobeads	EPHA2	1	1.45153	1.34638	1.33099	1.4535	1.26688	0.976898	0.561209	0.205443	36225000	Normalized LFQ intensity	1.60012	0.199595	1.31752	1806.01	1806.01	796.408	0.412958	745.808	0.904633	-0.775219	High confidence
Cabozantinib	4 cell line mix	Kinobeads	FECH	1	1.49812	1.30647	1.40121	1.49061	1.34632	1.20714	0.82978	0.430984	56360000	Normalized LFQ intensity	1.93167	0.42348	1.34138	2641.39	2641.39	1265.75	0.994935	2628.02	0.831777	0.761417	High confidence
Cabozantinib	4 cell line mix	Kinobeads	FLT3	1	1.86705	1.58371	1.44102	0.720471	0	0	0	0	4249800	Normalized LFQ intensity	3.99435	-0.00247633	1.4763	98.7942	98.7942	20.7906	0.537356	53.0876	0.91718	8.32062	High confidence
Cabozantinib	4 cell line mix	Kinobeads	FRK	1	1.58789	1.4017	1.4381	1.60162	1.29777	0.980842	0.577447	0.204346	81916000	Normalized LFQ intensity	1.5012	0.200274	1.4028	1647.78	1647.78	953.563	0.339663	559.69	0.864721	4.18495	High confidence
Cabozantinib	4 cell line mix	Kinobeads	HCK	1	1.68846	1.49903	1.55626	1.66469	1.35674	1.29934	0.721411	0.380681	173310000	Normalized LFQ intensity	2.15757	0.375639	1.46565	2119.12	2119.12	1106.83	0.518348	1098.44	0.800757	6.63408	High confidence
Cabozantinib	4 cell line mix	Kinobeads	LCK	1	1.54522	1.29747	1.28979	1.41941	1.1538	1.08001	0.765287	0.402152	179520000	Normalized LFQ intensity	1.24366	0.364884	1.30183	2372.12	2372.12	1880.51	0.440511	1044.94	0.821919	1.10701	High confidence
Cabozantinib	4 cell line mix	Kinobeads	LYN	1	1.14862	1.11723	1.11858	1.26438	1.01021	0.964684	0.826077	0.568655	320010000	Normalized LFQ intensity	1.1338	0.538606	1.12052	2656.9	2656.9	2042.04	0.501873	1333.43	0.867085	-11.1885	High confidence
Cabozantinib	4 cell line mix	Kinobeads	MAP2K5	1	1.38216	1.52632	1.44463	1.39123	1.35897	1.19053	0.909711	0.527516	8910900	Normalized LFQ intensity	1.58696	0.511766	1.35321	2726.29	2726.29	1795.58	0.875759	2387.57	0.80021	0.660705	High confidence
Cabozantinib	4 cell line mix	Kinobeads	NTRK1	1	1.23377	1.08843	1.51979	1.63389	1.10377	1.0189	1.004	0	1599800	Normalized LFQ intensity	1.71044	-0.00262679	1.2454	5819.48	5819.48	5506.91	0.705864	4107.76	0.784798	7.72988	High confidence
Cabozantinib	4 cell line mix	Kinobeads	PIP4K2C	1	1.21338	1.25645	1.56059	0.9243	1.50121	0.933056	0.685425	0	2547800	Normalized LFQ intensity	1.52177	-0.00154321	1.23421	3198.34	3198.34	2362	0.907123	2901.29	0.796839	7.62461	High confidence
Cabozantinib	4 cell line mix	Kinobeads	PTK6	1	1.99723	1.98705	2.10534	1.87517	1.86288	1.41401	1.0923	0	3002000	Normalized LFQ intensity	1.43765	-0.00227336	1.79929	3649.31	3649.31	3116.49	0.483081	1762.91	0.773399	15.3914	High confidence
Cabozantinib	4 cell line mix	Kinobeads	RET	1	1.37552	1.18536	0.967318	0.715388	0.549433	0.192918	0.0562292	0	74200000	Normalized LFQ intensity	0.962409	-0.00145249	1.19182	195.409	195.409	96.8873	0.440569	86.0913	0.952751	-4.34449	High confidence
Cabozantinib	4 cell line mix	Kinobeads	RIPK2	1	1.61997	1.52095	1.51624	1.77009	1.45008	1.42524	0.851893	0.372631	113030000	Normalized LFQ intensity	2.96608	0.37278	1.47967	2734.97	2734.97	1067.9	0.280618	767.481	0.789375	6.98904	High confidence
Cabozantinib	4 cell line mix	Kinobeads	RIPK3	1	1.39275	1.5589	1.2856	1.4285	1.37814	1.10861	0.632015	0	3947500	Normalized LFQ intensity	1.72931	-0.00154274	1.34195	2750.57	2750.57	1069.73	0.894178	2459.5	0.905871	1.51131	High confidence
Canertinib	4 cell line mix	Kinobeads	BCR	1	1.23896	1.27208	1.37458	1.17421	0.796688	0.848571	0.685176	0.336753	14736000	Normalized LFQ intensity	0.776932	0.283262	1.21915	1437.84	1437.84	2041.76	0.477847	687.067	0.836268	-0.514162	High confidence
Canertinib	4 cell line mix	Kinobeads	BTK	1	1.44248	1.38895	1.35764	1.35192	1.11236	0.917458	0.139166	0.105025	646540000	Normalized LFQ intensity	3.02699	0.0817907	1.27993	1289.13	1289.13	368.021	0.390881	503.898	0.929003	-0.137779	High confidence
Canertinib	4 cell line mix	Kinobeads	CSNK1G2	1	1.11226	0.843496	0.713477	0.857424	0.809852	0.499986	0.523467	0	722280	Normalized Intensity	0.642245	-0.0464587	0.962096	2126.92	2126.92	2501.42	0.875279	1861.65	0.875464	-3.16385	Low confidence
Canertinib	4 cell line mix	Kinobeads	EGFR	1	0.795102	0.254483	0.270946	0.406387	0.276815	0	0	0	7851900	Normalized LFQ intensity	0.419575	-0.0463551	1.01318	10.1022	10.1022	16.5557	0.793047	8.0115	0.858244	-0.744415	High confidence
Canertinib	4 cell line mix	Kinobeads	EPHA5	1	1.42389	1.35168	2.0068	1.22224	1.24254	1.50924	0.915193	0.517609	4015000	Normalized Intensity	4.99729	0.515971	1.394	2905.9	2905.9	1062.85	0.598997	1740.62	0.568815	12.1573	High confidence
Canertinib	4 cell line mix	Kinobeads	EPHA7	1	1.56718	0.487121	0.780173	1.75265	1.24197	0.524562	0.483764	0	664250	Normalized Intensity	1.56931	0.0487304	1.13212	1502.28	1502.28	3391.8	0.791806	1189.51	0.512153	18.8934	High confidence
Canertinib	4 cell line mix	Kinobeads	EPHB4	1	1.20645	1.29233	1.34266	1.36493	1.35745	1.16343	1.03722	0.649727	11593000	Normalized LFQ intensity	1.69878	0.628828	1.25603	4209.2	4209.2	3926.44	0.494832	2082.85	0.764253	-3.74454	High confidence
Canertinib	4 cell line mix	Kinobeads	GAK	1	1.41831	1.36107	1.32579	1.39702	1.16971	1.11232	0.684459	0.290555	206360000	Normalized LFQ intensity	1.61227	0.272005	1.28847	2405.77	2405.77	1073.14	0.56156	1350.98	0.888947	-1.77484	High confidence
Canertinib	4 cell line mix	Kinobeads	INPPL1	1	0.985481	0	1.0335	0.899489	0.762006	0.903794	0	0	3319600	Normalized LFQ intensity	13.5477	-0.000764172	0.797746	2071.1	2071.1	11343	0.483409	1001.19	0.555842	14.6423	Low confidence
Canertinib	4 cell line mix	Kinobeads	RET	1	1.47919	1.33999	1.30935	1.1639	1.07016	0.973641	1.11059	0.595152	80132000	Normalized LFQ intensity	0.664337	0.439048	1.2654	5640.07	5640.07	12083.4	0.440569	2484.84	0.65489	1.44421	High confidence
Canertinib	4 cell line mix	Kinobeads	RIPK2	1	1.57065	1.4581	1.30344	1.57288	1.46992	1.35269	0.634462	0.283197	112150000	Normalized LFQ intensity	3.62384	0.28415	1.39596	2420.97	2420.97	940.877	0.280618	679.367	0.856408	3.77893	High confidence
Canertinib	4 cell line mix	Kinobeads	RIPK3	1	1.45994	1.69925	1.70571	1.60967	1.32072	1.18332	0.654572	0	2417500	Normalized LFQ intensity	1.47181	-0.00169955	1.48043	2521.05	2521.05	1445.56	0.894178	2254.27	0.856829	7.61127	High confidence
Canertinib	4 cell line mix	Kinobeads	STK10	1	1.43689	1.41301	1.46974	1.23119	1.16253	1.14668	1.26578	0.632455	62235000	Normalized LFQ intensity	5.9901	0.63247	1.26659	6357.4	6357.4	43526.5	0.915468	5820	0.653155	1.77112	High confidence
Canertinib	4 cell line mix	Kinobeads	TEC	1	1.33406	1.38603	1.32835	1.37128	1.38278	1.21369	1.11472	0.659104	47873000	Normalized LFQ intensity	1.64071	0.623003	1.29601	5299.02	5299.02	7381.05	0.402382	2132.23	0.757448	-2.75743	High confidence
Canertinib	4 cell line mix	Kinobeads	UNC119	1	0.694517	0.712595	0.770439	0.79353	0.451649	0.864494	0.495622	0.16104	1276700	Normalized Intensity	7.54487	0.160628	0.755549	3103.46	3103.46	897.856	0.72583	2252.59	0.664755	0.869816	Low confidence
Canertinib	4 cell line mix	Kinobeads	ZAK	1	1.25585	1.20921	1.17611	1.04282	0.958114	0.867146	0.574869	0.0971932	17758000	Normalized LFQ intensity	0.788704	-0.108522	1.15582	3790.46	3790.46	3299.13	0.743597	2818.57	0.956149	-10.6746	High confidence
Capmatinib	4 cell line mix	Kinobeads	CDKL5	1	0.976477	1.08447	1.16795	0.981273	0.925804	0.879214	0.374033	0	350290	Normalized Intensity	1.90014	-0.00754687	1.03013	2295.93	2295.93	444.147	0.889376	2041.94	0.969301	-13.2647	Low confidence
Capmatinib	4 cell line mix	Kinobeads	LMAN1	1	2.3667	2.07983	2.73854	2.91785	1.58802	2.05765	1.05301	0	2199600	Normalized Intensity	2.68654	-0.00285687	2.1224	2992.36	2992.36	1742.99	1.46853	2992.36	0.629453	25.409	Low confidence
Capmatinib	4 cell line mix	Kinobeads	MET	1	0.160303	0.0925021	0	0	0	0	0	0	3971800	Normalized Intensity	0.804407	-0.00536718	0.999925	0.420059	0.420059	0.143703	0.803492	0.337514	0.998317	-42.0911	High confidence
Capmatinib	4 cell line mix	Kinobeads	SEC16A	1	0.846158	0.991704	0.961018	0.746167	0.717883	0.920216	0	0	5461900	Normalized LFQ intensity	16.1061	-0.00164821	0.88332	1725.58	1725.58	15393.2	1.18462	1725.58	0.937917	-5.94184	Low confidence
CC-401	4 cell line mix	Kinobeads	AAK1	1	1.20997	1.09539	1.09024	1.01761	1.03904	NA	0.651447	0.195773	339610000	Normalized LFQ intensity	0.989658	0.0781566	1.0943	3874.15	3874.15	2796.05	0.673073	2607.59	0.967014	-12.9187	High confidence
CC-401	4 cell line mix	Kinobeads	AP2A1	1	1.01506	0.996052	1.00237	0.918646	1.0494	NA	0.607131	0.467358	62064000	Normalized LFQ intensity	5.41488	0.467355	0.996922	2482.38	2482.38	3346	0.918545	2280.18	0.972467	-21	Low confidence
CC-401	4 cell line mix	Kinobeads	AP2B1	1	0.92845	0.985071	1.0182	0.943585	0.845942	NA	0.659525	0.488629	29773000	Normalized LFQ intensity	0.792616	0.443498	0.988795	1596.74	1596.74	1076.88	1.0069	1596.74	0.971803	-23.1666	Low confidence
CC-401	4 cell line mix	Kinobeads	BMP2K	1	1.11881	1.02863	1.05428	1.07996	0.89489	NA	0.459985	0.0735099	350040000	Normalized LFQ intensity	0.99079	0.000907376	1.06302	2218.85	2218.85	754.631	0.660952	1466.55	0.985809	-17.7601	High confidence
CC-401	4 cell line mix	Kinobeads	CALR	1	0.600815	1.02424	0.591577	0.600902	0.431361	NA	0.304849	0.568504	23057000	Normalized Intensity	1.44388	0.438551	0.87265	39.6908	39.6908	64.5818	1.41632	39.6908	0.597117	2.68953	Low confidence
CC-401	4 cell line mix	Kinobeads	CSNK1A1	1	0.766074	0.665	0.676548	0.587356	0.582452	NA	0.28883	0.0364622	102340000	Normalized LFQ intensity	0.255355	-0.532472	0.983097	5588.09	5588.09	7766.48	0.923531	5160.78	0.977384	-17.8332	High confidence
CC-401	4 cell line mix	Kinobeads	CSNK1D	1	0.903683	0.71658	0.704453	0.6675	0.477488	NA	0.141284	0	234170000	Normalized LFQ intensity	0.484602	-0.100822	0.975238	348.312	348.312	240.505	0.822647	286.538	0.979122	-15.6736	High confidence
CC-401	4 cell line mix	Kinobeads	CSNK1E	1	0.974928	1.04061	1.01662	1.05671	0.748736	NA	0	0	38711000	Normalized LFQ intensity	9.71063	3.30382e-05	1.01779	333.345	333.345	184.245	0.85489	284.974	0.997176	-27.3332	High confidence
CC-401	4 cell line mix	Kinobeads	CSNK1G1	1	1.01369	0.824205	0.683024	0.654342	0.557378	NA	0	0	15168000	Normalized LFQ intensity	0.605883	-0.120047	0.996875	325.595	325.595	239.769	0.865559	281.821	0.958967	-8.22936	High confidence
CC-401	4 cell line mix	Kinobeads	CSNK1G2	1	1.36207	1.17794	0.972736	0.763424	0	NA	0	0	3363400	Normalized Intensity	3.96754	-0.00188098	1.13033	119.66	119.66	37.7918	0.875279	104.736	0.957629	-2.19004	High confidence
CC-401	4 cell line mix	Kinobeads	CSNK1G3	1	0.717284	0.559397	0.576425	0.489527	0.458561	NA	0.127683	0	85162000	Normalized LFQ intensity	0.32139	-0.108607	0.981636	123.694	123.694	153.619	0.786223	97.2507	0.96487	-13.2195	High confidence
CC-401	4 cell line mix	Kinobeads	CSNK2A1;CSNK2A3	1	0.867642	0.734036	0.725453	0.611317	0.542016	NA	0.176907	0.0429226	321720000	Normalized LFQ intensity	0.376378	-0.21781	0.990657	746.979	746.979	806.583	1.01946	746.979	0.986877	-20.4302	High confidence
CC-401	4 cell line mix	Kinobeads	CSNK2A2	1	0.932692	0.778797	0.723644	0.662086	0.55696	NA	0.146027	0.0134113	476940000	Normalized LFQ intensity	0.458001	-0.175907	0.991407	606.811	606.811	480.532	0.962701	584.178	0.984744	-18.0769	High confidence
CC-401	4 cell line mix	Kinobeads	CSNK2B	1	1.02186	0.895767	0.89806	0.83694	0.745121	NA	0.171437	0.0558374	172950000	Normalized LFQ intensity	1.08743	0.0260153	0.962886	741.452	741.452	224.75	1.08129	741.452	0.986867	-18.3078	High confidence
CC-401	4 cell line mix	Kinobeads	DCAF7	1	0.7981	0.668325	0.559193	0	0	NA	0	0	10837000	Normalized LFQ intensity	1.502	-0.0259419	0.896486	31.2467	31.2467	16.3533	0.89643	28.0105	0.960757	-7.64104	High confidence
CC-401	4 cell line mix	Kinobeads	DYRK1A	1	0.999482	0.735774	0.745225	0.660565	0.320792	NA	0	0	18290000	Normalized LFQ intensity	0.739884	-0.0617559	0.980309	172.451	172.451	86.7297	0.933007	160.898	0.967487	-9.85081	High confidence
CC-401	4 cell line mix	Kinobeads	EIF3J	1	0.942994	1.05359	1.02896	1.00353	0.846163	NA	0.107288	0.0134335	168200000	Normalized LFQ intensity	1.74168	0.0152218	1.01071	783.747	783.747	185.424	1.10588	783.747	0.994217	-22.6658	High confidence
CC-401	4 cell line mix	Kinobeads	FAM83B	1	0.955777	0	0	0	0	NA	0	0	3058400	Normalized LFQ intensity	1.38553	-7.38879e-05	1.17421	2.39226	2.39226	NA	1.05785	2.39226	0.816486	5.79239	Low confidence
CC-401	4 cell line mix	Kinobeads	FECH	1	0.993435	0.90936	0.902584	0.843922	0.81858	NA	0.759071	0.272067	168340000	Normalized LFQ intensity	0.618232	-0.401372	0.942881	32549.2	32549.2	48550.4	0.994935	32384.3	0.950471	-15.2895	High confidence
CC-401	4 cell line mix	Kinobeads	GAK	1	1.08916	1.08517	1.11987	1.11202	0.97424	NA	0.572861	0.185936	2153100000	Normalized LFQ intensity	1.14789	0.133053	1.081	2606.15	2606.15	764.815	0.56156	1463.51	0.98416	-18.5289	High confidence
CC-401	4 cell line mix	Kinobeads	GAPVD1	1	1.49429	1.52904	1.41182	1.49374	1.54192	NA	0.525032	0.556226	23094000	Normalized LFQ intensity	5.79149	0.539688	1.41181	1068.01	1068.01	4165.57	0.994854	1062.51	0.841442	4.1483	Low confidence
CC-401	4 cell line mix	Kinobeads	KLHL6	1	1.05828	1.12564	0.889213	1.00122	0.859498	NA	0.282802	0.0908412	14740000	Normalized Intensity	1.19516	0.0717144	1.02963	1059.33	1059.33	467.652	0.740829	784.782	0.972441	-11.9987	Low confidence
CC-401	4 cell line mix	Kinobeads	MAP4K4	1	1.30314	1.11029	1.19625	1.32148	1.06787	NA	0.835744	0.398214	7536200	Normalized LFQ intensity	1.17918	0.323196	1.17552	4171.84	4171.84	4831.95	1.01351	4171.84	0.871466	-3.6077	High confidence
CC-401	4 cell line mix	Kinobeads	MAPK10	1	1.06476	0.909429	0.738149	1.24762	0.934041	NA	0.627611	0	36811000	Normalized Intensity	2.27701	-0.00391358	0.982926	3858.02	3858.02	5941.83	0.840483	3242.6	0.857102	0.995894	High confidence
CC-401	4 cell line mix	Kinobeads	MAPK8	1	0.87165	0.802743	0.77697	0.713634	0.579936	NA	0.187986	0.0154421	394140000	Normalized LFQ intensity	0.478015	-0.191711	0.965543	982.024	982.024	762.364	0.648022	636.373	0.988779	-20.9628	High confidence
CC-401	4 cell line mix	Kinobeads	MAPK9	1	0.873971	0.820853	0.860777	0.67523	0.532034	NA	0.161355	0	162430000	Normalized LFQ intensity	0.640914	-0.0669423	0.95349	485.814	485.814	204.327	0.699871	340.007	0.988896	-20.2709	High confidence
CC-401	4 cell line mix	Kinobeads	MELK	1	1.3688	1.14232	0.853757	0.842252	0.525841	NA	0	0	58900000	Normalized LFQ intensity	0.955683	-0.045816	1.15783	245.313	245.313	148.13	0.883754	216.796	0.937514	-1.08264	High confidence
CC-401	4 cell line mix	Kinobeads	MYLK3	1	1.47836	1.16889	1.23656	0.963053	0.905027	NA	0	0	6022600	Normalized LFQ intensity	1.43435	-0.0446454	1.20429	554.962	554.962	331.458	0.870308	482.988	0.929293	1.31611	High confidence
[truncated: 4,681 more rows]

## Sheet: in BT-474
Drug	Lysate	Beads	Gene Name	Relative Intensity DMSO	Relative Intensity 3 nM	Relative Intensity 10 nM	Relative Intensity 30 nM	Relative Intensity 100 nM	Relative Intensity 300 nM	Relative Intensity 1000 nM	Relative Intensity 3000 nM	Relative Intensity 30000 nM	DMSO Intensity	Intensity Type	Slope	Bottom	Top	Inflection	EC50	EC50 Standard Error	Correction Factor	Apparent Kd	R2	BIC	Target Classification
[truncated: 299 more rows]

[truncated: 2 more sheets: with Caki-1, Omipalisib Probe]
